# Supplementary material for: Ligand-enabled Ir-catalyzed intermolecular diastereoselective and enantioselective allylic alkylation of 3-substituted indoles
Source: Royal Society of Chemistry journal article supplement (doi:10.1039/c5sc01772f), 2015-01-01
Supplement: c5sc01772f1.pdf [file c5sc01772f1.pdf]

*Supporting Information for*

Ligand-Enabled Ir-Catalyzed Intermolecular Diastereoselective and  
Enantioselective Allylic Alkylation of 3-Substituted Indoles

Xiao Zhang, Wen-Bo Liu, Hang-Fei Tu, and Shu-Li You\*

State Key Laboratory of Organometallic Chemistry, Shanghai Institute of Organic  
Chemistry, Chinese Academy of Sciences, 345 Lingling Lu, Shanghai 200032, China;  
Collaborative Innovation Center of Chemical Science and Engineering (Tianjin)

E-mail: [slyou@sioc.ac.cn](mailto:slyou@sioc.ac.cn)

**Table of Contents**

|                                                                      |         |
|----------------------------------------------------------------------|---------|
| General methods                                                      | S2      |
| Optimization of the reaction conditions                              | S2-3    |
| Experimental details and characterization data                       | S3-18   |
| Procedure for the synthesis of <b>4ma</b>                            | S18-19  |
| Ir-catalyzed asymmetric allylic alkylation of tryptophan derivatives | S19-21  |
| Gram-scale synthesis of <b>4aa</b>                                   | S21-22  |
| Procedure for the synthesis of <b>7</b>                              | S22-23  |
| Procedure for Pt/C catalyzed hydrogenation of compound <b>4aa</b>    | S23-24  |
| Procedure for the synthesis of <b>9</b>                              | S24     |
| Determination of the absolute configuration                          | S25-28  |
| Copies of NMR spectra and HPLC chromatographs                        | S29-134 |

**General methods.** Unless stated otherwise, all reactions were carried out in flame-dried glassware under a dry argon atmosphere. All solvents were freshly distilled according to standard methods prior to use.

$^1\text{H}$  and  $^{13}\text{C}$  NMR spectra were recorded on a Varian instrument (300 MHz and 75 MHz, 400 MHz and 100 MHz, respectively) and internally referenced to tetramethylsilane signal or residual protio solvent signals.  $^{19}\text{F}$  NMR spectra were recorded on Varian instrument (282 MHz and 376 MHz, respectively) and referenced relative to  $\text{CFC}_3$ . Data for  $^1\text{H}$  NMR are recorded as follows: chemical shift ( $\delta$ , ppm), multiplicity (s = singlet, d = doublet, t = triplet, m = multiplet or unresolved, br = broad singlet, coupling constant(s) in Hz, integration). Data for  $^{13}\text{C}$  NMR are reported in terms of chemical shift ( $\delta$ , ppm).

**Table S1. Optimization of the reaction conditions<sup>a</sup>**

| entry             | base                     | t (h) | conv. (%) <sup>b</sup> | dr ( <b>4aa</b> ) <sup>b</sup> | yield ( <b>4aa</b> ) (%) <sup>c</sup> | ee (%) <sup>d</sup> |
|-------------------|--------------------------|-------|------------------------|--------------------------------|---------------------------------------|---------------------|
| 1                 | $\text{Cs}_2\text{CO}_3$ | 5     | >95                    | 5/1                            | 84                                    | 87                  |
| 2                 | -                        | 36    | 45                     | 9/1                            | 42                                    | 86                  |
| 3                 | $\text{K}_2\text{CO}_3$  | 36    | 72                     | 4/1                            | 58                                    | 81                  |
| 4                 | $\text{K}_3\text{PO}_4$  | 36    | 54                     | >20/1                          | 15                                    | 80                  |
| 5                 | DBN                      | 24    | -                      | 9/1                            | -                                     | 91                  |
| 6                 | DBU                      | 15    | 62                     | 10/1                           | -                                     | 90                  |
| 7                 | DABCO                    | 24    | 32                     | 6/1                            | -                                     | 83                  |
| 8                 | P.S.                     | 24    | 23                     | 12/1                           | -                                     | 59                  |
| 9                 | $\text{Et}_3\text{N}$    | 24    | 90                     | 8/1                            | 64                                    | 87                  |
| 10 <sup>e</sup>   | $\text{Et}_3\text{N}$    | 6     | >95                    | 8/1                            | 82                                    | 90                  |
| 11 <sup>e,f</sup> | $\text{Et}_3\text{N}$    | 12    | >95                    | 15/1                           | 70                                    | 95                  |

|                     |                   |    |     |       |    |    |
|---------------------|-------------------|----|-----|-------|----|----|
| 12 <sup>e,f,g</sup> | Et <sub>3</sub> N | 12 | >95 | >20/1 | 82 | 95 |
|---------------------|-------------------|----|-----|-------|----|----|

<sup>a</sup> 2.0 mol% of [Ir(COD)Cl]<sub>2</sub>, 4.0 mol% of **1c**, 100 mol% of base, 150 mol% of **3a** and 100 mol% of **2a** in THF at 50 °C. Unless noted, Ir-catalyst was prepared *via* *n*-PrNH<sub>2</sub> activation. <sup>b</sup> Determined by <sup>1</sup>H NMR of the crude reaction mixture. Unless noted, **4aa/5aa**: >97/3. <sup>c</sup> Isolated yield. <sup>d</sup> Ee of **4aa** was determined by HPLC analysis (Chiralpak IC). <sup>e</sup> 100 mol% of **3a** and 200 mol% of **2a** were used. <sup>f</sup> The reaction was performed at rt. <sup>g</sup> Ir-catalyst was *in situ* prepared by TBD (10 mol%) activation.

### General procedure for Ir-catalyzed intermolecular diastereoselective and enantioselective allylic alkylation of 3-substituted indoles

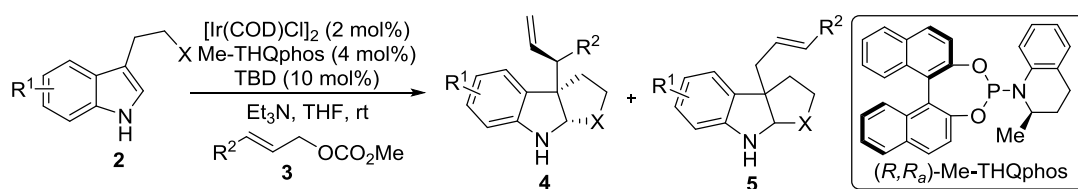

A flame-dried Schlenk tube was cooled to room temperature and filled with argon. To this flask were added [Ir(COD)Cl]<sub>2</sub> (5.4 mg, 0.008 mmol, 2.0 mol%), (*R,R<sub>a</sub>*)-**1c** (7.4 mg, 0.016 mmol, 4.0 mol%), TBD (5.6 mg, 0.04 mmol, 10 mol%), and THF (1.0 mL). The reaction mixture was stirred at room temperature for 10 min, generating an orange solution. To another Schlenk tube were added indole derivative **2** (0.8 mmol, 200 mol%), allylic carbonate **3** (0.40 mmol, 100 mol%), Et<sub>3</sub>N (40.4 mg, 0.40 mmol, 100 mol%), and THF (3 mL). Then, the above pre-formed catalyst solution was transferred to this tube. The reaction mixture was stirred at room temperature until allylic carbonate **3** was fully consumed (monitored by TLC). Upon completion of the reaction, the mixture was concentrated under reduced pressure. The ratio of **4/5** and diastereoselectivity of **4** were determined by <sup>1</sup>H NMR of the crude reaction mixture. Then the residue was purified by silica gel column chromatography (PE/EA = 20/1) to afford the desired product **4**. The characterization data of the products are summarized below.

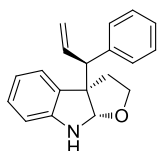

**4aa.** Yellow oil, 82% yield, 95% ee [Daicel Chiralpak IC (0.46 cm x 25 cm), *n*-hexane/2-propanol = 100/1,  $\nu = 1.0 \text{ mL} \cdot \text{min}^{-1}$ ,  $\lambda = 254 \text{ nm}$ ,  $t$  (minor) = 19.96 min,  $t$  (major) = 26.60 min];  $[\alpha]_{\text{D}}^{21} = -22.4$  ( $c = 1.0$ ,  $\text{CHCl}_3$ ).  $^1\text{H}$  NMR (300 MHz,  $\text{CDCl}_3$ , minor diastereomer indicated by \*)  $\delta$  2.17 (dd,  $J = 4.5, 11.7 \text{ Hz}$ , 1H), 2.33 (dt,  $J = 7.2, 11.7 \text{ Hz}$ , 1H), 3.46-3.55 (m, 2H), 3.96 (t,  $J = 7.5 \text{ Hz}$ , 1H), 4.30 (br s, 1H), 5.09 (d,  $J = 17.1 \text{ Hz}$ , 1H), 5.17 (d,  $J = 10.2 \text{ Hz}$ , 1H), 5.39 (s, 1H), 5.44 (s, 1H\*), 6.34 (ddd,  $J = 8.7, 10.2, 16.8 \text{ Hz}$ , 1H), 6.47 (d,  $J = 7.8 \text{ Hz}$ , 1H), 6.68-6.73 (m, 1H), 6.88-6.91 (m, 3H), 7.06 (dt,  $J = 1.2, 7.8 \text{ Hz}$ , 1H), 7.15-7.19 (m, 3H).  $^{13}\text{C}$  NMR (100 MHz,  $\text{CDCl}_3$ )  $\delta$  39.2, 57.4, 61.9, 67.6, 96.6, 108.4, 117.1, 118.5, 124.8, 126.7, 128.1, 128.4, 128.6, 130.2, 137.9, 140.6, 150.5. IR (thin film):  $\nu_{\text{max}} (\text{cm}^{-1}) = 3403, 3348, 2970, 2867, 1606, 1470, 1412, 1360, 1314, 1241, 1154, 1109, 1040, 1011, 957, 915, 744, 722, 700, 663$ ; HRMS (ESI) calcd for  $\text{C}_{19}\text{H}_{20}\text{NO}$   $[\text{M}+\text{H}]^+$ : 278.1539. Found: 278.1529.

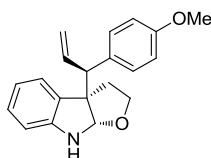

**4ab.** Yellow oil, 79% yield, 96% ee [Agilent 1260 Infinity Analytical SFC system Daicel Chiralpak AD-H (0.46 cm x 15 cm),  $\text{CO}_2$ /2-propanol = 90/10,  $\nu = 1.3 \text{ mL} \cdot \text{min}^{-1}$ ,  $\lambda = 214 \text{ nm}$ ,  $t$  (minor) = 22.01 min,  $t$  (major) = 36.45 min];  $[\alpha]_{\text{D}}^{22} = -0.70$  ( $c = 1.0$ ,  $\text{CHCl}_3$ ).  $^1\text{H}$  NMR (400 MHz,  $\text{CDCl}_3$ , minor diastereomer indicated by \*)  $\delta$  2.16 (dd,  $J = 4.8, 12.0 \text{ Hz}$ , 1H), 2.27-2.35 (m, 1H), 3.47-3.54 (m, 2H), 3.74 (s, 3H), 3.78 (s, 3H\*), 3.96 (t,  $J = 7.6 \text{ Hz}$ , 1H), 4.36 (s, 1H), 4.54 (s, 1H\*), 5.05 (d,  $J = 17.2 \text{ Hz}$ , 1H), 5.15 (d,  $J = 10.4 \text{ Hz}$ , 1H), 5.37 (s, 1H), 5.41 (s, 1H\*), 5.93-6.01 (m, 1H\*), 6.27-6.36 (m, 1H), 6.48 (d,  $J = 8.0 \text{ Hz}$ , 1H), 6.54 (d,  $J = 7.6 \text{ Hz}$ , 1H\*), 6.69-6.72 (m, 3H), 6.80 (d,  $J = 8.4 \text{ Hz}$ , 2H), 6.92 (d,  $J = 7.6 \text{ Hz}$ , 1H), 7.06 (t,  $J = 6.8 \text{ Hz}$ , 1H).  $^{13}\text{C}$  NMR (100 MHz,  $\text{CDCl}_3$ )  $\delta$  39.2, 55.0, 56.6, 61.9, 67.6, 96.6, 108.4, 113.4, 116.8, 118.4, 124.8, 128.3, 129.5, 130.3, 132.7, 138.1, 150.5, 158.2. IR (thin film):  $\nu_{\text{max}} (\text{cm}^{-1})$



= 3400, 2966, 2869, 1608, 1510, 1467, 1412, 1360, 1306, 1243, 1179, 1108, 1034, 953, 916, 832, 808, 742, 656; HRMS (ESI) calcd for C<sub>20</sub>H<sub>22</sub>NO<sub>2</sub> [M+H]<sup>+</sup>: 308.1645. Found: 308.1639.

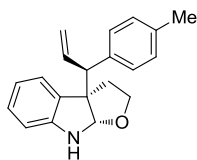

**4ac.** Yellow oil, 79% yield, 97% ee [Daicel Chiralpak IC (0.46 cm x 25 cm), *n*-hexane/2-propanol = 100/1,  $\nu$  = 1.0 mL · min<sup>-1</sup>,  $\lambda$  = 254 nm, *t* (minor) = 19.57 min, *t* (major) = 28.16 min];  $[\alpha]_D^{23}$  = -7.5 (*c* = 1.0, CHCl<sub>3</sub>). <sup>1</sup>H NMR (400 MHz, CDCl<sub>3</sub>, minor diastereomer indicated by \*)  $\delta$  2.17 (dd, *J* = 4.8, 12.0 Hz, 1H), 2.28 (s, 3H), 2.30-2.36 (m, 1H), 3.48-3.54 (m, 2H), 3.97 (t, *J* = 7.6 Hz, 1H), 4.33 (br s, 1H), 5.07 (d, *J* = 17.2 Hz, 1H), 5.14 (d, *J* = 10.0 Hz, 1H), 5.39 (s, 1H), 5.42 (s, 1H\*), 6.32 (ddd, *J* = 8.4, 10.0, 16.8 Hz, 1H), 6.49 (d, *J* = 8.0 Hz, 1H), 6.72 (t, *J* = 6.8 Hz, 1H), 6.78 (d, *J* = 8.4 Hz, 2H), 6.94 (d, *J* = 7.2 Hz, 1H), 6.98 (d, *J* = 8.0 Hz, 2H), 7.06 (t, *J* = 7.2 Hz, 1H). <sup>13</sup>C NMR (100 MHz, CDCl<sub>3</sub>)  $\delta$  21.0, 39.3, 57.1, 61.9, 67.6, 96.6, 108.4, 116.9, 118.5, 124.8, 128.3, 128.5, 128.8, 130.4, 136.2, 137.6, 138.1, 150.5. IR (thin film):  $\nu_{\max}$  (cm<sup>-1</sup>) = 3407, 3352, 2921, 2853, 1607, 1512, 1467, 1411, 1359, 1314, 1241, 1108, 1066, 1041, 1014, 957, 916, 801, 739, 657; HRMS (ESI) calcd for C<sub>20</sub>H<sub>22</sub>NO [M+H]<sup>+</sup>: 292.1696. Found: 292.1685.

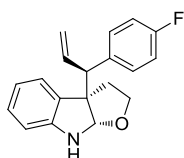

**4ad.** Yellow oil, 80% yield, 95% ee [Agilent 1260 Infinity Analytical SFC system Daicel Chiralpak AD-H (0.46 cm x 15 cm), CO<sub>2</sub>/2-propanol = 95/5,  $\nu$  = 1.3 mL · min<sup>-1</sup>,  $\lambda$  = 230 nm, *t* (minor) = 24.01 min, *t* (major) = 38.60 min];  $[\alpha]_D^{25}$  = -14.2 (*c* = 1.0, CHCl<sub>3</sub>). <sup>1</sup>H NMR (400 MHz, CDCl<sub>3</sub>, minor diastereomer indicated by \*)  $\delta$  2.18 (dd, *J* = 4.4, 11.6 Hz, 1H), 2.31 (dt, *J* = 7.2, 11.6 Hz, 1H), 3.47-3.55 (m, 2H), 3.98 (t, *J* = 8.0 Hz, 1H), 4.35 (br s, 1H), 5.07 (d, *J* = 16.8 Hz, 1H), 5.18 (d, *J* = 10.0

Hz, 1H), 5.33 (s, 1H), 5.43 (s, 1H\*), 6.31 (ddd,  $J = 8.0, 10.0, 16.8$  Hz, 1H), 6.47 (d,  $J = 8.0$  Hz, 1H), 6.71 (dt,  $J = 0.8, 7.6$  Hz, 1H), 6.80-6.87 (m, 4H), 6.92 (d,  $J = 7.6$  Hz, 1H), 7.06 (dt,  $J = 1.2, 8.0$  Hz, 1H).  $^{13}\text{C}$  NMR (100 MHz,  $\text{CDCl}_3$ )  $\delta$  39.2, 56.6, 61.8, 67.7, 96.6, 108.5, 114.8 ( $J = 21.3$  Hz), 117.3, 118.5, 124.7, 128.6, 129.8, 130.0 ( $J = 7.6$  Hz), 136.3 ( $J = 3.1$  Hz), 137.7, 150.5, 161.6 ( $J = 244.4$  Hz).  $^{19}\text{F}$  NMR (376 MHz,  $\text{CDCl}_3$ )  $\delta$  -115.91 (m). IR (thin film):  $\nu_{\text{max}}$  ( $\text{cm}^{-1}$ ) = 3346, 2946, 2869, 1605, 1507, 1469, 1412, 1314, 1222, 1159, 1109, 1042, 1012, 959, 918, 836, 808, 740, 656; HRMS (ESI) calcd for  $\text{C}_{19}\text{H}_{19}\text{FNO}$   $[\text{M}+\text{H}]^+$ : 296.1445. Found: 296.1444.

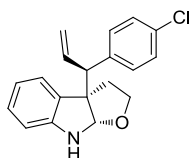

**4ae.** Yellow oil, 68% yield, 95% ee [Daicel Chiralpak IC (0.46 cm x 25 cm),  $n$ -hexane/2-propanol = 100/1,  $\nu = 1.0 \text{ mL} \cdot \text{min}^{-1}$ ,  $\lambda = 254 \text{ nm}$ ,  $t$  (minor) = 20.17 min,  $t$  (major) = 23.74 min];  $[\alpha]_{\text{D}}^{21} = 0.03$  ( $c = 1.0$ ,  $\text{CHCl}_3$ ).  $^1\text{H}$  NMR (400 MHz,  $\text{CDCl}_3$ , minor diastereomer indicated by \*)  $\delta$  2.18 (dd,  $J = 4.4, 11.6$  Hz, 1H), 2.30 (dt,  $J = 7.2, 11.6$  Hz, 1H), 3.47-3.53 (m, 2H), 3.97 (t,  $J = 7.2$  Hz, 1H), 4.34 (br s, 1H), 5.05-5.09 (m, 1H), 5.19 (dd,  $J = 1.2, 10.4$  Hz, 1H), 5.32 (s, 1H), 5.42 (s, 1H\*), 6.30 (ddd,  $J = 8.4, 10.0, 16.8$  Hz, 1H), 6.47 (d,  $J = 7.6$  Hz, 1H), 6.53 (d,  $J = 8.0$  Hz, 1H\*), 6.72 (t,  $J = 7.6$  Hz, 1H), 6.77-6.81 (m, 2H), 6.94 (d,  $J = 7.6$  Hz, 1H), 7.06 (t,  $J = 7.6$  Hz, 1H), 7.11-7.14 (m, 2H).  $^{13}\text{C}$  NMR (100 MHz,  $\text{CDCl}_3$ )  $\delta$  39.3, 56.8, 61.7, 67.6, 96.6, 108.5, 117.5, 118.5, 124.7, 128.2, 128.6, 129.6, 129.9, 132.5, 137.5, 139.1, 150.5. IR (thin film):  $\nu_{\text{max}}$  ( $\text{cm}^{-1}$ ) = 3346, 2969, 2871, 1607, 1486, 1408, 1361, 1315, 1239, 1156, 1091, 1042, 1012, 954, 919, 825, 804, 743, 705, 656; HRMS (ESI) calcd for  $\text{C}_{19}\text{H}_{19}\text{ClNO}$   $[\text{M}+\text{H}]^+$ : 312.1150. Found: 312.1140.

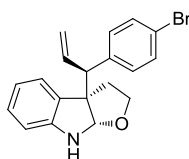

**4af.** Yellow oil, 70% yield, 94% ee [Daicel Chiralpak IC (0.46 cm x 25 cm),

*n*-hexane/2-propanol = 100/1,  $\nu = 1.0 \text{ mL} \cdot \text{min}^{-1}$ ,  $\lambda = 254 \text{ nm}$ ,  $t$  (minor) = 21.82 min,  $t$  (major) = 26.31 min];  $[\alpha]_{\text{D}}^{25} = -0.13$  ( $c = 1.0$ ,  $\text{CHCl}_3$ ).  $^1\text{H}$  NMR (400 MHz,  $\text{CDCl}_3$ , minor diastereomer indicated by \*)  $\delta$  2.19 (dd,  $J = 4.8, 12.0 \text{ Hz}$ , 1H), 2.26-2.34 (m, 1H), 3.48-3.54 (m, 2H), 3.98 (t,  $J = 7.6 \text{ Hz}$ , 1H), 4.32 (s, 1H), 5.07 (d,  $J = 17.2 \text{ Hz}$ , 1H), 5.19 (d,  $J = 10.4 \text{ Hz}$ , 1H), 5.32 (s, 1H), 5.43 (s, 1H\*), 6.25-6.34 (m, 1H), 6.48 (d,  $J = 8.0 \text{ Hz}$ , 1H), 6.70-6.75 (m, 3H), 6.95 (d,  $J = 7.6 \text{ Hz}$ , 1H), 7.07 (t,  $J = 7.6 \text{ Hz}$ , 1H), 7.26-7.29 (m, 2H).  $^{13}\text{C}$  NMR (100 MHz,  $\text{CDCl}_3$ )  $\delta$  39.3, 56.9, 61.7, 67.6, 96.6, 108.5, 117.5, 118.5, 120.7, 124.7, 128.6, 129.6, 130.3, 131.1, 137.4, 139.6, 150.5. IR (thin film):  $\nu_{\text{max}}$  ( $\text{cm}^{-1}$ ) = 3347, 3051, 2924, 2858, 1607, 1483, 1405, 1314, 1239, 1109, 1072, 1042, 1008, 958, 918, 823, 802, 741, 656; HRMS (ESI) calcd for  $\text{C}_{19}\text{H}_{19}\text{BrNO}$   $[\text{M}+\text{H}]^+$ : 356.0645. Found: 356.0639.

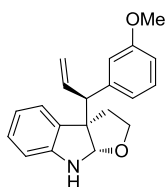

**4ag.** Yellow oil, 66% yield, 95% ee [Daicel Chiralpak IC (0.46 cm x 25 cm), *n*-hexane/2-propanol = 100/1,  $\nu = 1.0 \text{ mL} \cdot \text{min}^{-1}$ ,  $\lambda = 254 \text{ nm}$ ,  $t$  (minor) = 39.92 min,  $t$  (major) = 57.94 min];  $[\alpha]_{\text{D}}^{23} = -20.4$  ( $c = 1.0$ ,  $\text{CHCl}_3$ ).  $^1\text{H}$  NMR (400 MHz,  $\text{CDCl}_3$ , minor diastereomer indicated by \*)  $\delta$  2.21 (dd,  $J = 4.8, 12.0 \text{ Hz}$ , 1H), 2.28-2.36 (m, 1H), 3.49-3.54 (m, 2H), 3.55 (s, 3H), 3.98 (t,  $J = 7.6 \text{ Hz}$ , 1H), 4.32 (br s, 1H), 5.11 (d,  $J = 17.2 \text{ Hz}$ , 1H), 5.18 (d,  $J = 10.0 \text{ Hz}$ , 1H), 5.36 (s, 1H), 5.43 (s, 1H\*), 6.29-6.38 (m, 2H), 6.48 (d,  $J = 8.0 \text{ Hz}$ , 1H), 6.55 (d,  $J = 7.6 \text{ Hz}$ , 1H), 6.71-6.75 (m, 2H), 7.00-7.11 (m, 3H).  $^{13}\text{C}$  NMR (100 MHz,  $\text{CDCl}_3$ )  $\delta$  39.6, 54.8, 57.7, 61.8, 67.5, 96.6, 108.5, 112.9, 113.2, 117.1, 118.4, 121.1, 124.8, 128.4, 129.0, 130.1, 137.8, 142.1, 150.6, 159.0. IR (thin film):  $\nu_{\text{max}}$  ( $\text{cm}^{-1}$ ) = 3403, 3355, 2945, 2867, 1602, 1484, 1468, 1436, 1414, 1316, 1262, 1158, 1041, 1012, 917, 739, 699, 657; HRMS (ESI) calcd for  $\text{C}_{20}\text{H}_{22}\text{NO}_2$   $[\text{M}+\text{H}]^+$ : 308.1645. Found: 308.1639.

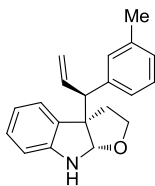

**4ah.** Yellow oil, 78% yield, 94% ee [Agilent 1260 Infinity Analytical SFC system Daicel Chiralpak IC (0.46 cm x 15 cm), CO<sub>2</sub>/2-propanol = 90/10,  $\nu$  = 1.3 mL · min<sup>-1</sup>,  $\lambda$  = 230 nm, t (minor) = 10.56 min, t (major) = 11.34 min]; [ $\alpha$ ]<sub>D</sub><sup>25</sup> = -32.0 (c = 1.0, CHCl<sub>3</sub>). <sup>1</sup>H NMR (400 MHz, CDCl<sub>3</sub>, minor diastereomer indicated by \*)  $\delta$  2.15-2.20 (m, 1H), 2.20 (s, 3H), 2.31 (dt,  $J$  = 6.8, 11.2 Hz, 1H), 3.47-3.53 (m, 2H), 3.96 (t,  $J$  = 7.6 Hz, 1H), 4.24 (br s, 1H), 5.08 (d,  $J$  = 16.8 Hz, 1H), 5.15 (d,  $J$  = 10.0 Hz, 1H), 5.37 (s, 1H), 5.41 (s, 1H\*), 6.32 (ddd,  $J$  = 8.4, 10.0, 16.8 Hz, 1H), 6.47 (d,  $J$  = 7.6 Hz, 1H), 6.55 (d,  $J$  = 8.0 Hz, 1H\*), 6.67-6.73 (m, 3H), 6.93 (d,  $J$  = 7.6 Hz, 1H), 6.98 (d,  $J$  = 7.6 Hz, 1H), 7.03-7.07 (m, 2H). <sup>13</sup>C NMR (100 MHz, CDCl<sub>3</sub>)  $\delta$  21.4, 39.2, 57.5, 61.9, 67.6, 96.5, 108.4, 117.0, 118.5, 124.8, 125.5, 127.4, 127.9, 128.4, 129.5, 130.3, 137.5, 138.0, 140.5, 150.5. IR (thin film):  $\nu_{\max}$  (cm<sup>-1</sup>) = 3406, 3353, 3030, 2970, 2867, 1606, 1469, 1412, 1360, 1314, 1242, 1154, 1041, 1013, 961, 915, 886, 782, 739, 702, 664; HRMS (ESI) calcd for C<sub>20</sub>H<sub>22</sub>NO [M+H]<sup>+</sup>: 292.1696. Found: 292.1697.

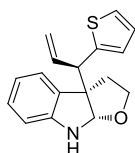

**4ai.** Yellow oil, 85% yield, 93% ee [Agilent 1260 Infinity Analytical SFC system Daicel Chiralpak AD-H (0.46 cm x 15 cm), CO<sub>2</sub>/2-propanol = 85/15,  $\nu$  = 1.3 mL · min<sup>-1</sup>,  $\lambda$  = 230 nm, t (minor) = 16.40 min, t (major) = 20.62 min]; [ $\alpha$ ]<sub>D</sub><sup>23</sup> = -25.7 (c = 1.0, CHCl<sub>3</sub>). <sup>1</sup>H NMR (400 MHz, CDCl<sub>3</sub>, minor diastereomer indicated by \*)  $\delta$  2.18 (dd,  $J$  = 4.8, 12.0 Hz, 1H), 2.30 (dt,  $J$  = 7.2, 11.6 Hz, 1H), 2.49 (dt,  $J$  = 7.2, 11.6 Hz, 1H\*), 3.51-3.57 (m, 1H), 3.93-4.00 (m, 2H), 4.45 (s, 1H), 4.54 (s, 1H\*), 5.07-5.18 (m, 2H), 5.47 (d,  $J$  = 1.6 Hz, 1H), 5.85-5.94 (m, 1H\*), 6.18-6.27 (m, 1H), 6.51 (d,  $J$  = 8.0 Hz, 1H), 6.62 (d,  $J$  = 4.0 Hz, 1H), 6.67 (d,  $J$  = 6.8 Hz, 1H\*), 6.71-6.75 (m, 1H), 6.84-6.87 (m, 1H), 6.90-6.92 (m, 1H\*), 7.02 (d,  $J$  = 7.2 Hz, 1H), 7.07-7.11 (m, 2H). <sup>13</sup>C NMR (100 MHz, CDCl<sub>3</sub>)  $\delta$  39.5, 52.9, 61.9, 67.4, 96.8, 108.4, 117.2, 118.6, 124.2,

124.9, 125.4, 126.2, 128.7, 129.7, 137.8, 142.9, 150.8. IR (thin film):  $\nu_{\max}$  ( $\text{cm}^{-1}$ ) = 3350, 3077, 3051, 2944, 2867, 1607, 1469, 1437, 1358, 1313, 1237, 1153, 1108, 1040, 1012, 954, 918, 739, 696; HRMS (ESI) calcd for  $\text{C}_{17}\text{H}_{18}\text{NOS}$   $[\text{M}+\text{H}]^+$ : 284.1104. Found: 284.1094.

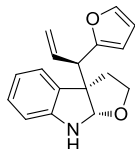

**4aj.** Yellow oil, 54% yield, 95% ee [Daicel Chiralpak IC (0.46 cm x 25 cm), *n*-hexane/2-propanol = 100/1,  $\nu$  = 1.0 mL  $\cdot$  min $^{-1}$ ,  $\lambda$  = 254 nm, *t* (minor) = 22.80 min, *t* (major) = 55.77 min];  $[\alpha]_{\text{D}}^{25}$  = -8.1 (*c* = 1.0,  $\text{CHCl}_3$ ).  $^1\text{H}$  NMR (400 MHz,  $\text{CDCl}_3$ , minor diastereomer indicated by \*)  $\delta$  2.11 (dd, *J* = 4.8, 12.4 Hz, 1H), 2.19 (dd, *J* = 4.8, 12.4 Hz, 1H\*), 2.30 (dt, *J* = 7.2, 12.0 Hz, 1H), 2.52 (dt, *J* = 7.2, 12.0 Hz, 1H\*), 3.48-3.55 (m, 1H), 3.74 (d, *J* = 9.6 Hz, 1H\*), 3.79 (d, *J* = 8.0 Hz, 1H), 3.90-3.94 (m, 1H), 3.97-4.01 (m, 1H\*), 4.55 (s, 1H), 4.99-5.04 (m, 1H), 5.12-5.15 (m, 1H), 5.48 (s, 1H\*), 5.61 (s, 1H), 5.88 (dd, *J* = 0.4, 3.2 Hz, 1H), 6.05 (ddd, *J* = 8.0, 10.4, 17.2 Hz, 1H), 6.27-6.28 (m, 1H), 6.31-6.33 (m, 1H\*), 6.51-6.53 (m, 1H\*), 6.54-6.57 (m, 1H), 6.61-6.52 (m, 1H\*), 6.67-6.71 (m, 1H), 6.80-6.82 (m, 1H), 7.04-7.08 (m, 1H), 7.34-7.40 (m, 1H).  $^{13}\text{C}$  NMR (100 MHz,  $\text{CDCl}_3$ )  $\delta$  38.1, 49.6, 61.3, 67.3, 96.1, 107.3, 108.3, 110.2, 117.9, 118.6, 124.2, 128.4, 130.7, 135.2, 141.2, 150.0, 154.0. IR (thin film):  $\nu_{\max}$  ( $\text{cm}^{-1}$ ) = 3406, 3351, 2968, 2869, 1607, 1483, 1412, 1360, 1315, 1259, 1150, 1069, 1012, 957, 919, 799, 737, 658; HRMS (ESI) calcd for  $\text{C}_{17}\text{H}_{18}\text{NO}_2$   $[\text{M}+\text{H}]^+$ : 268.1332. Found: 268.1332.

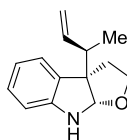

**4ak.** Yellow oil, 46% yield, 93% ee [Agilent 1260 Infinity Analytical SFC system Daicel Chiralcel OJ-H (0.46 cm x 15 cm),  $\text{CO}_2$ /2-propanol = 90/10,  $\nu$  = 1.3 mL  $\cdot$  min $^{-1}$ ,  $\lambda$  = 214 nm, *t* (minor) = 8.61 min, *t* (major) = 10.69 min];  $[\alpha]_{\text{D}}^{25}$  = -45.0 (*c*

= 1.0, CHCl<sub>3</sub>). <sup>1</sup>H NMR (400 MHz, CDCl<sub>3</sub>, minor diastereomer indicated by \*) δ 0.92 (d, *J* = 6.4 Hz, 3H), 1.27 (d, *J* = 6.4 Hz, 3H\*), 2.07 (dd, *J* = 4.4, 11.6 Hz, 1H), 2.18 (dt, *J* = 7.2, 11.6 Hz, 1H), 2.49 (t, *J* = 6.8 Hz, 1H), 3.04 (t, *J* = 6.8 Hz, 1H\*), 3.47-3.53 (m, 1H), 3.88 (t, *J* = 6.8 Hz, 1H\*), 3.96 (t, *J* = 7.6 Hz, 1H), 4.56 (s, 1H), 5.05-5.10 (m, 2H), 5.33 (s, 1H), 5.72-5.81 (m, 1H\*), 5.94-6.03 (m, 1H), 6.56-6.58 (m, 1H), 6.72 (t, *J* = 7.2 Hz, 1H), 7.03-7.09 (m, 2H). <sup>13</sup>C NMR (100 MHz, CDCl<sub>3</sub>) δ 15.2, 39.2, 44.9, 61.3, 67.6, 97.6, 108.1, 115.3, 118.4, 124.6, 128.2, 140.0, 140.4, 150.4. IR (thin film): ν<sub>max</sub> (cm<sup>-1</sup>) = 3406, 3344, 2967, 2933, 2866, 1637, 1607, 1466, 1416, 1360, 1313, 1251, 1222, 1070, 1035, 1001, 952, 914, 741, 659; HRMS (ESI) calcd for C<sub>14</sub>H<sub>18</sub>NO [M+H]<sup>+</sup>: 216.1383. Found: 216.1385.

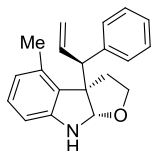

**4ba.** White solid, 50% yield, 97% ee [Daicel Chiralpak IC (0.46 cm x 25 cm), *n*-hexane/2-propanol = 90/10, ν = 1.0 mL · min<sup>-1</sup>, λ = 254 nm, t (minor) = 7.59 min, t (major) = 14.46 min]; [α]<sub>D</sub><sup>24</sup> = -61.2 (c = 1.0, CHCl<sub>3</sub>). <sup>1</sup>H NMR (400 MHz, CDCl<sub>3</sub>, minor diastereomer indicated by \*) δ 2.10-2.24 (m, 2H), 2.34 (s, 3H\*), 2.37 (s, 3H), 3.46-3.52 (m, 1H), 3.60-3.65 (m, 1H), 4.04 (d, *J* = 8.0 Hz, 1H), 4.48 (br s, 1H), 4.85 (d, *J* = 16.8 Hz, 1H), 4.93 (d, *J* = 10.4 Hz, 1H), 5.68 (s, 1H), 5.76 (s, 1H\*), 6.00 (ddd, *J* = 8.0, 10.0, 16.8 Hz, 1H), 6.43 (d, *J* = 7.6 Hz, 1H), 6.56 (d, *J* = 7.6 Hz, 1H), 6.99 (t, *J* = 7.6 Hz, 1H), 7.23-7.34 (m, 5H). <sup>13</sup>C NMR (100 MHz, CDCl<sub>3</sub>) δ 18.7, 35.3, 53.9, 62.2, 67.0, 94.6, 106.2, 116.7, 121.7, 126.9, 128.2, 128.4, 128.9, 129.6, 133.9, 137.9, 140.5, 150.1. IR (thin film): ν<sub>max</sub> (cm<sup>-1</sup>) = 3354, 3057, 2977, 2922, 2868, 1590, 1491, 1464, 1365, 1313, 1260, 1159, 1061, 1022, 998, 968, 919, 742, 700, 677, 655; HRMS (ESI) calcd for C<sub>20</sub>H<sub>22</sub>NO [M+H]<sup>+</sup>: 292.1696. Found: 292.1694. mp = 81.0-84.6 °C.

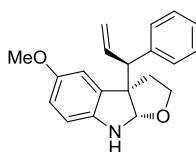

**4ca.** Yellow oil, 74% yield, 91% ee [Agilent 1260 Infinity Analytical SFC system Daicel Chiralpak AD-H (0.46 cm x 15 cm), CO<sub>2</sub>/2-propanol = 85/15,  $\nu$  = 1.3 mL · min<sup>-1</sup>,  $\lambda$  = 230 nm, t (minor) = 10.68 min, t (major) = 14.90 min]; [ $\alpha$ ]<sub>D</sub><sup>21</sup> = +28.6 (c = 1.0, CHCl<sub>3</sub>). <sup>1</sup>H NMR (400 MHz, CDCl<sub>3</sub>, minor diastereomer indicated by \*)  $\delta$  2.16 (dd,  $J$  = 4.4, 12.0 Hz, 1H), 2.34 (dt,  $J$  = 7.6, 12.0 Hz, 1H), 2.44 (dt,  $J$  = 7.6, 12.0 Hz, 1H\*), 3.42-3.54 (m, 2H), 3.65 (s, 3H\*), 3.68 (s, 3H), 3.97 (t,  $J$  = 7.2 Hz, 1H), 4.10 (br s, 1H), 5.10 (d,  $J$  = 17.2 Hz, 1H), 5.18 (d,  $J$  = 10.4 Hz, 1H), 5.38 (s, 1H), 5.42 (s, 1H\*), 6.34 (ddd,  $J$  = 8.8, 10.4, 17.2 Hz, 1H), 6.43-6.46 (m, 2H), 6.49-6.51 (m, 2H\*), 6.65 (dd,  $J$  = 2.4, 8.4 Hz, 1H), 6.91-6.93 (m, 2H), 7.17-7.19 (m, 3H). <sup>13</sup>C NMR (100 MHz, CDCl<sub>3</sub>)  $\delta$  38.8, 55.8, 57.2, 62.3, 67.6, 97.5, 109.5, 111.4, 113.6, 117.3, 126.8, 128.1, 128.7, 132.0, 137.7, 140.6, 144.4, 153.2. IR (thin film):  $\nu_{\text{max}}$  (cm<sup>-1</sup>) = 3359, 3061, 3029, 2943, 2867, 1633, 1598, 1489, 1437, 1259, 1209, 1182, 1153, 1035, 1012, 959, 917, 805, 741, 702, 649; HRMS (ESI) calcd for C<sub>20</sub>H<sub>22</sub>NO<sub>2</sub> [M+H]<sup>+</sup>: 308.1645. Found: 308.1632.

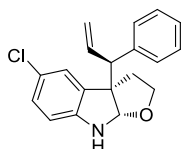

**4da.** Yellow oil, 83% yield, 96% ee [Daicel Chiralpak IC (0.46 cm x 25 cm), *n*-hexane/2-propanol = 100/1,  $\nu$  = 1.0 mL · min<sup>-1</sup>,  $\lambda$  = 254 nm, t (minor) = 14.65 min, t (major) = 18.74 min]; [ $\alpha$ ]<sub>D</sub><sup>20</sup> = +36.4 (c = 1.0, CHCl<sub>3</sub>). <sup>1</sup>H NMR (400 MHz, CDCl<sub>3</sub>, minor diastereomer indicated by \*)  $\delta$  2.14 (dd,  $J$  = 4.4, 12.0 Hz, 1H), 2.28-2.36 (m, 1H), 2.39-2.47 (m, 1H\*), 3.47-3.53 (m, 2H), 3.66 (d,  $J$  = 10.0 Hz, 1H\*), 3.97 (t,  $J$  = 7.6 Hz, 1H), 4.35 (br s, 1H), 5.10 (d,  $J$  = 17.2 Hz, 1H), 5.20 (d,  $J$  = 10.0 Hz, 1H), 5.39 (s, 1H), 5.45 (s, 1H\*), 6.31 (ddd,  $J$  = 8.8, 10.4, 17.2 Hz, 1H), 6.38 (d,  $J$  = 8.0 Hz, 1H), 6.44 (d,  $J$  = 8.0 Hz, 1H\*), 6.84 (d,  $J$  = 2.0 Hz, 1H), 6.90-6.92 (m, 2H), 7.01 (dd,  $J$  = 2.0, 8.4 Hz, 1H), 7.19-7.20 (m, 3H). <sup>13</sup>C NMR (100 MHz, CDCl<sub>3</sub>)  $\delta$  39.1, 57.2, 62.1, 67.6, 96.9, 109.1, 117.7, 123.0, 124.9, 127.0, 128.2, 128.3, 128.6, 132.2, 137.2, 140.2, 149.0. IR (thin film):  $\nu_{\text{max}}$  (cm<sup>-1</sup>) = 3418, 3344, 2972, 2869, 1633, 1604, 1479, 1448, 1360, 1334, 1259, 1223, 1165, 1110, 1066, 1011, 959, 919, 888, 809, 736, 701, 666,

620; HRMS (ESI) calcd for C<sub>19</sub>H<sub>19</sub>ClNO [M+H]<sup>+</sup>: 312.1150. Found: 312.1150.

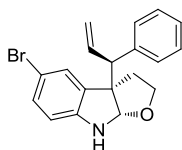

**4ea.** Yellow oil, 81% yield, 96% ee [Daicel Chiralpak IC (0.46 cm x 25 cm), *n*-hexane/2-propanol = 100/1,  $\nu = 1.0 \text{ mL} \cdot \text{min}^{-1}$ ,  $\lambda = 254 \text{ nm}$ ,  $t$  (minor) = 15.11 min,  $t$  (major) = 18.77 min];  $[\alpha]_{\text{D}}^{20} = +48.7$  ( $c = 1.0$ , CHCl<sub>3</sub>). <sup>1</sup>H NMR (400 MHz, CDCl<sub>3</sub>, minor diastereomer indicated by \*)  $\delta$  2.13 (dd,  $J = 4.4, 12.0 \text{ Hz}$ , 1H), 2.31 (dd,  $J = 5.6, 10.4 \text{ Hz}$ , 1H), 3.46-3.53 (m, 2H), 3.65 (d,  $J = 10.0 \text{ Hz}$ , 1H\*), 3.97 (t,  $J = 7.6 \text{ Hz}$ , 1H), 4.37 (s, 1H), 5.10 (d,  $J = 16.8 \text{ Hz}$ , 1H), 5.20 (d,  $J = 10.0 \text{ Hz}$ , 1H), 5.37 (s, 1H), 5.43 (s, 1H\*), 6.26-6.35 (m, 2H), 6.40 (d,  $J = 8.4 \text{ Hz}$ , 1H\*), 6.90-6.92 (m, 2H), 6.96 (d,  $J = 2.0 \text{ Hz}$ , 1H), 7.13-7.20 (m, 4H). <sup>13</sup>C NMR (100 MHz, CDCl<sub>3</sub>)  $\delta$  39.0, 57.1, 62.0, 67.6, 96.7, 109.6, 109.9, 117.7, 127.0, 127.7, 128.2, 128.6, 131.1, 132.7, 137.2, 140.1, 149.5. IR (thin film):  $\nu_{\text{max}}$  (cm<sup>-1</sup>) = 3417, 3342, 3061, 2972, 2869, 1602, 1476, 1448, 1434, 1360, 1334, 1259, 1223, 1163, 1124, 1065, 1035, 1011, 959, 919, 885, 808, 750, 735, 701, 668; HRMS (ESI) calcd for C<sub>19</sub>H<sub>19</sub>BrNO [M+H]<sup>+</sup>: 356.0645. Found: 356.0640.

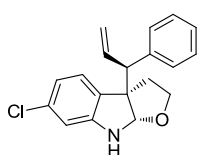

**4fa.** Yellow oil, 81% yield, 95% ee [Agilent 1260 Infinity Analytical SFC system Daicel Chiralpak IC (0.46 cm x 15 cm), CO<sub>2</sub>/2-propanol = 90/10,  $\nu = 1.3 \text{ mL} \cdot \text{min}^{-1}$ ,  $\lambda = 214 \text{ nm}$ ,  $t$  (minor) = 11.54 min,  $t$  (major) = 14.19 min];  $[\alpha]_{\text{D}}^{23} = -5.0$  ( $c = 1.0$ , CHCl<sub>3</sub>). <sup>1</sup>H NMR (400 MHz, CDCl<sub>3</sub>, minor diastereomer indicated by \*)  $\delta$  2.12 (dd,  $J = 4.4, 11.6 \text{ Hz}$ , 1H), 2.33 (dt,  $J = 7.2, 12.0 \text{ Hz}$ , 1H), 3.46-3.52 (m, 2H), 3.97 (t,  $J = 7.6 \text{ Hz}$ , 1H), 4.42 (br s, 1H), 5.09 (d,  $J = 16.8 \text{ Hz}$ , 1H), 5.19 (d,  $J = 10.4 \text{ Hz}$ , 1H), 5.39 (s, 1H), 5.44 (s, 1H\*), 6.01 (ddd,  $J = 8.4, 10.0, 16.8 \text{ Hz}$ , 1H\*), 6.30 (ddd,  $J = 8.4, 10.0, 16.8 \text{ Hz}$ , 1H), 6.44 (d,  $J = 1.6 \text{ Hz}$ , 1H), 6.64 (dd,  $J = 1.6, 7.6 \text{ Hz}$ , 1H), 6.74 (d,  $J = 7.6$



Hz, 1H), 6.90-6.92 (m, 2H), 7.18-7.20 (m, 3H).  $^{13}\text{C}$  NMR (100 MHz,  $\text{CDCl}_3$ )  $\delta$  39.0, 57.1, 61.4, 67.7, 96.8, 108.3, 117.6, 118.2, 125.5, 126.9, 128.2, 128.6, 128.8, 134.0, 137.4, 140.3, 151.4. IR (thin film):  $\nu_{\text{max}}$  ( $\text{cm}^{-1}$ ) = 3418, 3342, 2971, 2868, 1603, 1483, 1452, 1416, 1359, 1313, 1242, 1111, 1069, 1036, 958, 909, 839, 797, 734, 701, 669; HRMS (ESI) calcd for  $\text{C}_{19}\text{H}_{19}\text{ClNO}$   $[\text{M}+\text{H}]^+$ : 312.1150. Found: 312.1150.

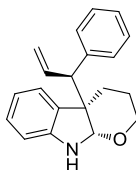

**4ga.** Yellow oil, 53% yield, 91% ee [Agilent 1260 Infinity Analytical SFC system Daicel Chiralcel OJ-H (0.46 cm x 15 cm),  $\text{CO}_2/2$ -propanol = 85/15,  $\nu$  = 1.3  $\text{mL} \cdot \text{min}^{-1}$ ,  $\lambda$  = 230 nm, t (major) = 7.66 min, t (minor) = 13.15 min];  $[\alpha]_{\text{D}}^{25}$  = -20.7 ( $c$  = 1.0,  $\text{CHCl}_3$ ).  $^1\text{H}$  NMR (400 MHz,  $\text{CDCl}_3$ , minor diastereomer indicated by \*)  $\delta$  1.32-1.41 (m, 1H), 1.52-1.58 (m, 1H), 1.94-2.02 (m, 1H), 2.09-2.14 (m, 1H), 3.34 (d,  $J$  = 10.0 Hz, 1H), 3.37-3.43 (m, 1H), 3.60-3.65 (m, 1H), 4.21 (s, 1H), 4.34 (s, 1H\*), 5.06 (s, 1H), 5.10-5.21 (m, 2H), 6.05 (ddd,  $J$  = 10.0, 10.0, 16.8 Hz, 1H\*), 6.32 (ddd,  $J$  = 10.0, 10.0, 16.8 Hz, 1H), 6.50-6.52 (m, 1H), 6.61-6.67 (m, 2H), 6.72-6.75 (m, 2H), 7.08 (dt,  $J$  = 1.2, 7.6 Hz, 1H), 7.11-7.17 (m, 3H).  $^{13}\text{C}$  NMR (100 MHz,  $\text{CDCl}_3$ )  $\delta$  21.0, 25.0, 50.9, 57.4, 61.0, 91.8, 109.3, 117.7, 118.3, 124.6, 126.4, 127.5, 128.0, 129.2, 130.2, 137.5, 140.2, 149.7. IR (thin film):  $\nu_{\text{max}}$  ( $\text{cm}^{-1}$ ) = 3334, 3078, 2918, 1605, 1484, 1464, 1411, 1321, 1235, 1205, 1068, 1012, 945, 914, 745, 713, 638; HRMS (ESI) calcd for  $\text{C}_{20}\text{H}_{22}\text{NO}$   $[\text{M}+\text{H}]^+$ : 292.1696. Found: 292.1693.

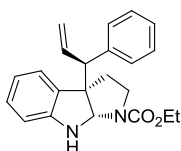

**4ha.** Yellow oil, 69% yield, 97% ee [Daicel Chiralpak IC (0.46 cm x 25 cm),  $n$ -hexane/2-propanol = 80/20,  $\nu$  = 0.4  $\text{mL} \cdot \text{min}^{-1}$ ,  $\lambda$  = 254 nm, t (minor) = 14.37 min, t (major) = 40.95 min];  $[\alpha]_{\text{D}}^{22}$  = -563.5 ( $c$  = 1.0,  $\text{CHCl}_3$ ).  $^1\text{H}$  NMR (400 MHz,  $d_6$ -DMSO)  $\delta$  1.25 (t,  $J$  = 6.4 Hz, 3H), 2.13 (dd,  $J$  = 6.0, 12.4 Hz, 1H), 2.27-2.35 (m,

1H), 2.84-2.91 (m, 1H), 3.57 (t,  $J = 9.6$  Hz, 1H), 3.63 (d,  $J = 8.4$  Hz, 1H), 4.11 (q,  $J = 6.8$  Hz, 2H), 5.06 (d,  $J = 16.8$  Hz, 1H), 5.14 (d,  $J = 10.4$  Hz, 1H), 5.32 (s, 1H), 5.87 (br s, 1H), 6.30-6.39 (m, 1H), 6.51 (d,  $J = 7.6$  Hz, 1H), 6.60 (t,  $J = 7.2$  Hz, 1H), 6.82 (d,  $J = 7.2$  Hz, 1H), 7.00-7.03 (m, 3H), 7.22-7.28 (m, 3H).  $^{13}\text{C}$  NMR (100 MHz,  $d_6$ -DMSO)  $\delta$  14.1, 34.3, 44.6, 56.0, 59.9, 73.1, 78.0, 108.0, 116.4, 116.6, 123.5, 126.0, 127.3, 127.7, 128.3, 129.4, 137.8, 140.3, 150.1, 153.3. IR (thin film):  $\nu_{\text{max}}$  ( $\text{cm}^{-1}$ ) = 3365, 2976, 2879, 1684, 1606, 1467, 1418, 1380, 1347, 1319, 1234, 1198, 1170, 1110, 1049, 920, 892, 744, 701, 673; HRMS (ESI) calcd for  $\text{C}_{22}\text{H}_{25}\text{N}_2\text{O}_2$   $[\text{M}+\text{H}]^+$ : 349.1911. Found: 349.1907.

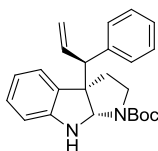

**4ia.** Yellow oil, 58% yield, 98% ee [Daicel Chiralpak AD-H (0.46 cm x 25 cm),  $n$ -hexane/2-propanol = 100/1,  $\nu = 1.0$  mL  $\cdot$  min $^{-1}$ ,  $\lambda = 254$  nm,  $t$  (major) = 22.66 min,  $t$  (minor) = 48.68 min];  $[\alpha]_{\text{D}}^{25} = -242.0$  ( $c = 1.0$ ,  $\text{CHCl}_3$ ).  $^1\text{H}$  NMR (400 MHz,  $\text{CDCl}_3$ , rotamer)  $\delta$  1.42 (s, 6H), 1.50 (s, 3H), 2.13-2.19 (m, 1H), 2.24-2.30 (m, 1H), 2.91-2.98 (m, 1H), 3.46 (d,  $J = 9.2$  Hz, 1H), 3.50-3.69 (m, 1H), 4.45 and 4.89 (s, 1H), 5.09-5.26 (m, 3H), 6.26-6.35 (m, 1H), 6.51 (d,  $J = 8.0$  Hz, 1H), 6.61-6.65 (m, 2H), 6.90-6.92 (m, 2H), 7.03-7.07 (m, 1H), 7.16-7.20 (m, 3H).  $^{13}\text{C}$  NMR (150 MHz,  $\text{CDCl}_3$ , rotamer)  $\delta$  28.4, 28.6, 29.7, 33.6, 33.7, 45.4, 45.8, 56.6, 56.8, 60.4, 61.5, 78.9, 79.7, 80.1, 109.1, 109.3, 117.5, 117.6, 118.0, 118.5, 124.4, 124.5, 126.7, 126.8, 127.86, 127.95, 127.98, 128.5, 128.6, 128.7, 128.8, 129.2, 129.9, 130.0, 137.3, 137.4, 140.4, 149.7, 150.1, 153.4, 154.3. IR (thin film):  $\nu_{\text{max}}$  ( $\text{cm}^{-1}$ ) = 3402, 3030, 2975, 2880, 1684, 1607, 1480, 1398, 1367, 1315, 1252, 1205, 1163, 1112, 1051, 994, 920, 891, 746, 704, 673; HRMS (ESI) calcd for  $\text{C}_{24}\text{H}_{29}\text{N}_2\text{O}_2$   $[\text{M}+\text{H}]^+$ : 377.2224. Found: 377.2215.

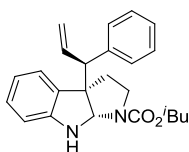

**4ja.** Yellow oil, 58% yield, 96% ee [Phenomenex Lu x 5u Cellulose-4 (0.46 cm x 25 cm), *n*-hexane/2-propanol = 100/1,  $\nu = 1.0 \text{ mL} \cdot \text{min}^{-1}$ ,  $\lambda = 254 \text{ nm}$ ,  $t$  (minor) = 22.27 min,  $t$  (major) = 43.56 min];  $[\alpha]_{\text{D}}^{25} = -109.6$  ( $c = 1.0$ ,  $\text{CHCl}_3$ ).  $^1\text{H}$  NMR (600 MHz,  $d_6$ -DMSO)  $\delta$  0.94-0.95 (m, 6H), 1.94 (br s, 1H), 2.13 (dd,  $J = 6.0, 12.6 \text{ Hz}$ , 1H), 2.29-2.34 (m, 1H), 2.87-2.88 (m, 1H), 3.58 (t,  $J = 9.6 \text{ Hz}$ , 1H), 3.63 (d,  $J = 8.4 \text{ Hz}$ , 1H), 3.83 (br s, 2H), 5.06 (d,  $J = 16.8 \text{ Hz}$ , 1H), 5.14 (dd,  $J = 1.2, 10.2 \text{ Hz}$ , 1H), 5.34 (s, 1H), 5.83 (br s, 1H), 6.34 (ddd,  $J = 9.0, 10.2, 17.4 \text{ Hz}$ , 1H), 6.51 (d,  $J = 8.4 \text{ Hz}$ , 1H), 6.60 (t,  $J = 7.2 \text{ Hz}$ , 1H), 6.82 (d,  $J = 7.2 \text{ Hz}$ , 1H), 7.00-7.02 (m, 3H), 7.20-7.23 (m, 3H).  $^{13}\text{C}$  NMR (150 MHz,  $d_6$ -DMSO)  $\delta$  18.40, 18.43, 27.1, 34.4, 44.6, 56.0, 60.0, 70.1, 78.1, 108.1, 116.5, 116.7, 123.5, 126.1, 127.4, 127.7, 128.3, 129.5, 137.8, 140.3, 150.1, 153.4. IR (thin film):  $\nu_{\text{max}} (\text{cm}^{-1}) = 3360, 2961, 2875, 1687, 1606, 1468, 1418, 1384, 1359, 1319, 1260, 1198, 1109, 1050, 989, 918, 886, 816, 744, 701, 674$ ; HRMS (ESI) calcd for  $\text{C}_{24}\text{H}_{29}\text{N}_2\text{O}_2$   $[\text{M}+\text{H}]^+$ : 377.2224. Found: 377.2223.

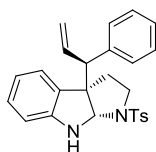

**4ka.** Yellow oil, 67% yield, 99% ee [Daicel Chiralpak AD-H (0.46 cm x 15 cm) and Chiralpak IC (0.46 cm x 25 cm), *n*-hexane/2-propanol/ $\text{Et}_2\text{NH}$  = 80/20/0.1,  $\nu = 0.7 \text{ mL} \cdot \text{min}^{-1}$ ,  $\lambda = 230 \text{ nm}$ ,  $t$  (minor) = 43.60 min,  $t$  (major) = 46.26 min];  $[\alpha]_{\text{D}}^{25} = -157.5$  ( $c = 1.0$ ,  $\text{CHCl}_3$ ).  $^1\text{H}$  NMR (400 MHz,  $\text{CDCl}_3$ , minor diastereomer indicated by \*)  $\delta$  1.96-2.10 (m, 2H), 2.36 (s, 3H\*), 2.45 (s, 3H), 3.03 (dt,  $J = 6.0, 10.8 \text{ Hz}$ , 1H), 3.30 (d,  $J = 9.2 \text{ Hz}$ , 1H), 3.41 (t,  $J = 9.2 \text{ Hz}$ , 1H), 4.58 (s, 1H), 5.01 (d,  $J = 17.2 \text{ Hz}$ , 1H), 5.06 (d,  $J = 10.4 \text{ Hz}$ , 1H), 5.26 (s, 1H), 6.03-6.12 (m, 1H), 6.52 (d,  $J = 8.0 \text{ Hz}$ , 1H), 6.58 (d,  $J = 7.2 \text{ Hz}$ , 1H), 6.64 (t,  $J = 7.6 \text{ Hz}$ , 1H), 6.80 (d,  $J = 7.2 \text{ Hz}$ , 2H), 7.06 (t,  $J = 7.6 \text{ Hz}$ , 1H), 7.13-7.19 (m, 3H), 7.30 (d,  $J = 8.0 \text{ Hz}$ , 2H), 7.69 (d,  $J = 8.0 \text{ Hz}$ , 2H).  $^{13}\text{C}$  NMR (100 MHz,  $\text{CDCl}_3$ )  $\delta$  21.5, 34.8, 47.5, 56.6, 62.0, 81.7, 109.6, 117.8, 118.7, 124.3, 126.9, 127.1, 128.1, 128.6, 128.8, 129.4, 129.7, 136.3, 136.9, 140.0, 143.4, 149.5. IR (thin film):  $\nu_{\text{max}} (\text{cm}^{-1}) = 3387, 2967, 2917, 1714, 1600, 1486, 1462, 1400, 1337, 1251, 1155, 1112, 1059, 920, 884, 779, 754, 700, 660$ ; HRMS (ESI) calcd for  $\text{C}_{26}\text{H}_{27}\text{N}_2\text{O}_2\text{S}$

$[M+H]^+$ : 431.1788. Found: 431.1782.

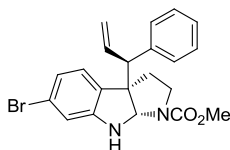

**4la.** Yellow oil, 75% yield, 98% ee [Daicel Chiralpak AD-H (0.46 cm x 25 cm), *n*-hexane/2-propanol = 100/1,  $\nu = 1.0 \text{ mL} \cdot \text{min}^{-1}$ ,  $\lambda = 254 \text{ nm}$ ,  $t$  (minor) = 39.25 min,  $t$  (major) = 44.19 min];  $[\alpha]_D^{23} = -530.0$  ( $c = 1.0$ ,  $\text{CHCl}_3$ ).  $^1\text{H}$  NMR (400 MHz,  $d_6$ -DMSO)  $\delta$  2.07 (dd,  $J = 5.6, 12.4 \text{ Hz}$ , 1H), 2.23-2.31 (m, 1H), 2.81-2.88 (m, 1H), 3.51-3.62 (m, 2H), 3.62 (s, 3H), 5.03 (d,  $J = 16.8 \text{ Hz}$ , 1H), 5.11 (d,  $J = 10.0 \text{ Hz}$ , 1H), 5.28 (s, 1H), 6.24 (br s, 1H), 6.24-6.33 (m, 1H), 6.60 (s, 1H), 6.67 (s, 2H), 6.98-7.00 (m, 2H), 7.20-7.21 (m, 3H).  $^{13}\text{C}$  NMR (100 MHz,  $d_6$ -DMSO)  $\delta$  34.2, 44.7, 51.5, 55.7, 59.8, 78.2, 110.4, 116.8, 118.9, 120.8, 125.1, 126.2, 127.5, 128.2, 129.0, 137.3, 140.0, 151.9, 153.6. IR (thin film):  $\nu_{\text{max}}$  ( $\text{cm}^{-1}$ ) = 3352, 2951, 2875, 1681, 1601, 1452, 1394, 1314, 1230, 1199, 1110, 1051, 989, 954, 920, 850, 777, 752, 724, 700, 625; HRMS (ESI) calcd for  $\text{C}_{21}\text{H}_{22}\text{BrN}_2\text{O}_2$   $[M+H]^+$ : 413.0859. Found: 413.0857.

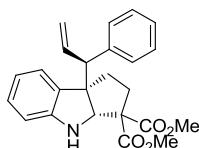

**4na.** Yellow oil, 48% yield, 99% ee [Agilent 1260 Infinity Analytical SFC system Daicel Chiralpak IC (0.46 cm x 15 cm),  $\text{CO}_2$ /2-propanol = 95/5,  $\nu = 1.3 \text{ mL} \cdot \text{min}^{-1}$ ,  $\lambda = 230 \text{ nm}$ ,  $t$  (major) = 20.66 min,  $t$  (minor) = 23.09 min];  $[\alpha]_D^{25} = -74.2$  ( $c = 1.0$ ,  $\text{CHCl}_3$ ).  $^1\text{H}$  NMR (400 MHz,  $\text{CDCl}_3$ )  $\delta$  1.87-1.96 (m, 1H), 2.12-2.28 (m, 3H), 3.37 (br s, 1H), 3.65 (s, 3H), 3.67 (d,  $J = 9.6 \text{ Hz}$ , 1H), 3.79 (s, 3H), 4.58 (s, 1H), 5.08 (d,  $J = 17.2 \text{ Hz}$ , 1H), 5.14 (d,  $J = 10.4 \text{ Hz}$ , 1H), 6.31-6.40 (m, 2H), 6.74-6.81 (m, 3H), 7.01-7.05 (m, 1H), 7.10-7.11 (m, 3H), 7.18 (d,  $J = 7.6 \text{ Hz}$ , 1H).  $^{13}\text{C}$  NMR (100 MHz,  $\text{CDCl}_3$ )  $\delta$  32.0, 38.0, 52.2, 52.7, 59.7, 62.3, 67.8, 69.6, 109.8, 116.5, 118.8, 124.6, 126.4, 127.9, 128.3, 128.9, 132.0, 138.2, 141.3, 151.7, 169.4, 171.9. IR (thin film):  $\nu_{\text{max}}$  ( $\text{cm}^{-1}$ ) = 3387, 2953, 2870, 1726, 1602, 1485, 1453, 1434, 1330, 1261, 1234,

1190, 1152, 1101, 1063, 1025, 993, 918, 742, 702; HRMS (ESI) calcd for  $C_{24}H_{26}NO_4$   $[M+H]^+$ : 392.1856. Found: 392.1854.

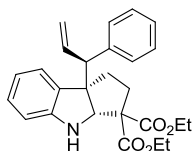

**40a.** Yellow oil, 67% yield, 98% ee [Agilent 1260 Infinity Analytical SFC system Daicel Chiralpak IC (0.46 cm x 15 cm),  $CO_2/2$ -propanol = 95/5,  $v = 1.3$  mL  $\cdot$  min $^{-1}$ ,  $\lambda = 230$  nm,  $t$  (major) = 21.84 min,  $t$  (minor) = 26.37 min];  $[\alpha]_D^{25} = -72.4$  ( $c = 1.0$ ,  $CHCl_3$ ).  $^1H$  NMR (400 MHz,  $CDCl_3$ , minor diastereomer indicated by \*)  $\delta$  1.19 (t,  $J = 7.2$  Hz, 3H), 1.29 (t,  $J = 6.8$  Hz, 3H), 1.87-1.95 (m, 1H), 2.11-2.27 (m, 3H), 3.39 (br s, 1H), 3.67 (d,  $J = 8.8$  Hz, 1H), 4.03-4.11 (m, 1H), 4.16-4.32 (m, 3H), 4.58 (s, 1H), 4.80 (s, 1H\*), 5.08 (d,  $J = 16.8$  Hz, 1H), 5.14 (d,  $J = 10.0$  Hz, 1H), 6.32-6.41 (m, 2H), 6.73-6.77 (m, 1H), 6.79-6.81 (m, 2H), 7.00-7.04 (m, 1H), 7.09-7.13 (m, 3H), 7.18 (d,  $J = 8.4$  Hz, 1H).  $^{13}C$  NMR (100 MHz,  $CDCl_3$ )  $\delta$  14.09, 14.12, 32.0, 37.9, 59.7, 61.0, 61.4, 62.3, 67.8, 69.4, 109.6, 116.4, 118.6, 124.5, 126.3, 127.9, 128.3, 128.9, 131.9, 138.3, 141.4, 151.8, 169.0, 171.6. IR (thin film):  $\nu_{max}$  ( $cm^{-1}$ ) = 3390, 2979, 1724, 1603, 1484, 1466, 1367, 1257, 1231, 1183, 1152, 1098, 1058, 1024, 917, 857, 803, 746, 702; HRMS (ESI) calcd for  $C_{26}H_{30}NO_4$   $[M+H]^+$ : 420.2169. Found: 420.2167.

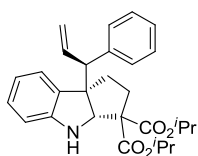

**4pa.** Yellow oil, 54% yield, 97% ee [Agilent 1260 Infinity Analytical SFC system Daicel Chiralpak IC (0.46 cm x 15 cm),  $CO_2/2$ -propanol = 95/5,  $v = 1.3$  mL  $\cdot$  min $^{-1}$ ,  $\lambda = 230$  nm,  $t$  (major) = 14.24 min,  $t$  (minor) = 17.33 min];  $[\alpha]_D^{25} = -81.8$  ( $c = 1.0$ ,  $CHCl_3$ ).  $^1H$  NMR (400 MHz,  $CDCl_3$ )  $\delta$  1.17 (d,  $J = 6.4$  Hz, 3H), 1.19 (d,  $J = 6.4$  Hz, 3H), 1.26 (d,  $J = 4.8$  Hz, 3H), 1.28 (d,  $J = 5.2$  Hz, 3H), 1.85-1.94 (m, 1H), 2.08-2.26 (m, 3H), 3.37 (br s, 1H), 3.67 (d,  $J = 8.8$  Hz, 1H), 4.57 (s, 1H), 4.99-5.14

(m, 4H), 6.32-6.41 (m, 2H), 6.74 (t,  $J = 7.2$  Hz, 1H), 6.80-6.81 (m, 2H), 7.01 (t,  $J = 8.0$  Hz, 1H), 7.09-7.12 (m, 3H), 7.17 (d,  $J = 7.2$  Hz, 1H).  $^{13}\text{C}$  NMR (100 MHz,  $\text{CDCl}_3$ )  $\delta$  21.5, 21.6, 21.7, 32.1, 37.8, 59.7, 62.3, 67.8, 68.4, 68.8, 69.2, 109.5, 116.3, 118.5, 124.5, 126.3, 127.9, 128.3, 128.9, 131.9, 138.4, 141.4, 151.8, 168.4, 171.1. IR (thin film):  $\nu_{\text{max}}$  ( $\text{cm}^{-1}$ ) = 3400, 2980, 1719, 1603, 1485, 1464, 1374, 1260, 1234, 1183, 1156, 1095, 1063, 997, 980, 913, 847, 808, 739, 702; HRMS (ESI) calcd for  $\text{C}_{28}\text{H}_{34}\text{NO}_4$   $[\text{M}+\text{H}]^+$ : 448.2482. Found: 448.2484.

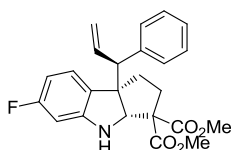

**4qa.** Yellow oil, 42% yield, 99% ee [Agilent 1260 Infinity Analytical SFC system Daicel Chiralpak IC (0.46 cm x 15 cm),  $\text{CO}_2/2$ -propanol = 95/5,  $\nu = 1.3$   $\text{mL} \cdot \text{min}^{-1}$ ,  $\lambda = 230$  nm,  $t$  (major) = 10.15 min,  $t$  (minor) = 12.56 min];  $[\alpha]_{\text{D}}^{24} = -75.8$  ( $c = 1.0$ ,  $\text{CHCl}_3$ ).  $^1\text{H}$  NMR (400 MHz,  $\text{CDCl}_3$ )  $\delta$  1.86-1.94 (m, 1H), 2.13-2.27 (m, 3H), 3.53 (br s, 1H), 3.64 (s, 3H), 3.64-3.66 (m, 1H), 3.78 (s, 3H), 4.61 (s, 1H), 5.08 (d,  $J = 16.8$  Hz, 1H), 5.15 (d,  $J = 10.0$  Hz, 1H), 6.04 (dd,  $J = 2.0, 9.6$  Hz, 1H), 6.31 (ddd,  $J = 8.8, 10.4, 17.2$  Hz, 1H), 6.40-6.45 (m, 1H), 6.81-6.83 (m, 2H), 7.04-7.08 (m, 1H), 7.12-7.14 (m, 3H).  $^{13}\text{C}$  NMR (100 MHz,  $\text{CDCl}_3$ )  $\delta$  31.9, 37.9, 52.3, 52.8, 59.5, 61.6, 67.6, 70.3, 96.9 ( $J = 25.8$  Hz), 104.9 ( $J = 22.8$  Hz), 116.8, 125.0 ( $J = 10.6$  Hz), 126.5, 127.3, 128.0, 128.9, 137.8, 141.1, 153.0 ( $J = 11.4$  Hz), 162.5, 164.9, 170.5 ( $J = 243.6$  Hz).  $^{19}\text{F}$  NMR (376 MHz,  $\text{CDCl}_3$ )  $\delta$  -114.96 (m). IR (thin film):  $\nu_{\text{max}}$  ( $\text{cm}^{-1}$ ) = 3391, 2958, 2321, 1727, 1610, 1493, 1453, 1435, 1329, 1236, 1194, 1146, 1101, 1072, 995, 919, 741, 704; HRMS (ESI) calcd for  $\text{C}_{24}\text{H}_{25}\text{FNO}_4$   $[\text{M}+\text{H}]^+$ : 410.1762. Found: 410.1761.

#### Procedure for the synthesis of 4ma

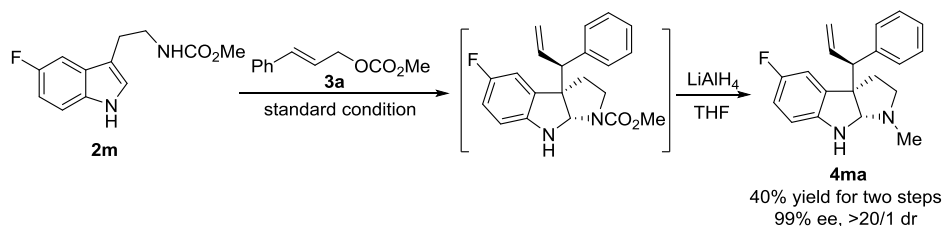

Following the general procedure for Ir-catalyzed intermolecular allylic alkylation of indole derivatives, the reaction of **2m** (239.1 mg, 1.2 mmol) and **3a** (582.0 mg, 2.4 mmol) was conducted under the standard conditions. Upon completion of the reaction, the mixture was concentrated under reduced pressure. The residue was subjected to a short column chromatography (PE/EA = 10/1) to afford the crude product (177.8 mg, 41% yield).

A flame-dried 25mL round bottom flask was cooled to room temperature and filled with argon. To this flask was added  $\text{LiAlH}_4$  (47.9 mg, 1.26 mmol), the atmosphere was exchanged with argon three times before the addition of THF (10 mL) and the slow addition of the solution of the crude product obtained above (147.8 mg, 0.42 mmol) in THF (5 mL). After the reaction was complete (monitored by TLC), the reaction mixture was quenched with water, extracted with ether. The combined organic layers were washed with brine, dried over  $\text{Na}_2\text{SO}_4$ , and filtrated. The solvent was removed under reduced pressure, the residue was purified by silica gel column chromatography (EA/ $\text{Et}_3\text{N}$  = 100/0.1) to afford the desired product **4ma**. Colorless liquid, 126.7 mg, 98% yield, 99% ee [Daicel Chiralcel OD-H (0.46 cm x 25 cm), *n*-hexane/2-propanol = 98/2,  $\nu$  = 0.5 mL · min<sup>-1</sup>,  $\lambda$  = 214 nm, *t* (minor) = 17.91 min, *t* (major) = 22.19 min];  $[\alpha]_{\text{D}}^{29}$  = -19.0 (*c* = 1.0,  $\text{CHCl}_3$ ). <sup>1</sup>H NMR (400 MHz,  $\text{CDCl}_3$ )  $\delta$  2.00-2.06 (m, 1H), 2.32-2.39 (m, 1H), 2.35 (s, 3H), 2.61-2.64 (m, 2H), 3.26 (br s, 1H), 3.47 (d, *J* = 8.8 Hz, 1H), 4.32 (s, 1H), 5.07 (dt, *J* = 1.6, 16.8 Hz, 1H), 5.19 (dt, *J* = 1.2, 10.4 Hz, 1H), 6.31 (ddd, *J* = 8.8, 10.4, 17.2 Hz, 1H), 6.42 (dd, *J* = 4.4, 8.4 Hz, 1H), 6.69-6.78 (m, 2H), 6.85-6.88 (m, 2H), 7.15-7.19 (m, 3H); <sup>13</sup>C NMR (150 MHz,  $\text{CDCl}_3$ )  $\delta$  36.9, 37.9, 52.4, 58.5, 61.9, 86.6, 110.3 (*J* = 8.1 Hz), 112.0 (*J* = 24.2 Hz), 114.3 (*J* = 23.6 Hz), 117.5, 126.7, 128.1, 128.9, 135.2 (*J* = 7.5 Hz), 137.7, 140.6, 147.0, 157.1 (*J* = 234 Hz). <sup>19</sup>F NMR (376 MHz,  $\text{CDCl}_3$ )  $\delta$  -125.7 (m). IR (thin film):  $\nu_{\text{max}}$  (cm<sup>-1</sup>) = 3390, 2930, 2857, 2790, 1603, 1486, 1448, 1347, 1247, 1184, 1158, 1113, 996, 917, 871, 804, 750, 702, 670; HRMS (ESI) calcd for  $\text{C}_{20}\text{H}_{22}\text{FN}_2$  [*M*+*H*]<sup>+</sup>: 309.1762. Found: 309.1764.

#### Ir-catalyzed asymmetric allylic alkylation of tryptophan derivatives

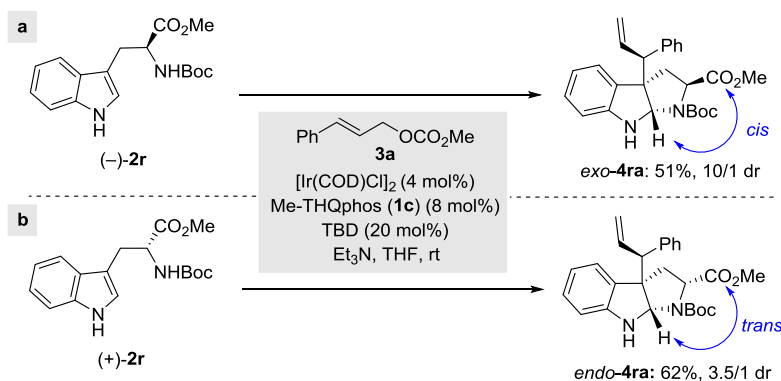

A flame-dried Schlenk tube was cooled to room temperature and filled with argon. To this flask were added [Ir(COD)Cl]<sub>2</sub> (10.8 mg, 0.016 mmol, 4.0 mol%), (*R,R*)-**1c** (14.8 mg, 0.032 mmol, 8.0 mol%), TBD (11.2 mg, 0.08 mmol, 20 mol%), and THF (1.0 mL). The reaction mixture was stirred at room temperature for 10 min, generating an orange solution. To another Schlenk tube were added indole derivative **2r** (0.8 mmol, 200 mol%), allylic carbonate **3a** (0.40 mmol, 100 mol%), Et<sub>3</sub>N (40.4 mg, 0.40 mmol, 100 mol%), and THF (3 mL). Then, the above pre-formed catalyst solution was transferred to this tube. The reaction mixture was stirred at room temperature until allylic carbonate **3** was fully consumed (monitored by TLC). Upon completion of the reaction, the mixture was concentrated under reduced pressure. The ratio of branched/linear ratio and diastereoselectivity of **4ra** were determined by <sup>1</sup>H NMR of the crude reaction mixture. Then the residue was purified by silica gel column chromatography (PE/EA = 20/1) to afford the desired product **4ra**. The characterization data of the products are summarized below.

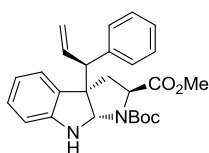

**cis-4ra**. Yellow oil, 51% yield.  $[\alpha]_D^{24} = -226.0$  (*c* = 1.0, CHCl<sub>3</sub>). <sup>1</sup>H NMR (600 MHz, *d*<sub>6</sub>-DMSO)  $\delta$  1.37-1.47 (m, 9H), 2.41-2.55 (m, 2H), 3.56 (d, *J* = 7.8 Hz, 1H), 3.71 (s, 3H), 3.86 (br, 1H), 5.08 (d, *J* = 16.8 Hz, 1H), 5.17 (d, *J* = 10.2 Hz, 1H), 5.32 (s, 1H), 5.86 (br s, 1H), 6.35 (ddd, *J* = 10.2, 10.2, 17.4 Hz, 1H), 6.58 (d, *J* = 7.8 Hz, 1H), 6.62 (t, *J* = 7.8 Hz, 1H), 6.80 (br s, 1H), 6.94 (t, *J* = 4.2 Hz, 2H), 7.04 (t, *J* = 7.8



Hz, 1H), 7.20-7.21 (m, 3H).  $^{13}\text{C}$  NMR (100 MHz,  $d_6$ -DMSO)  $\delta$  27.6, 38.2, 51.4, 55.7, 58.7, 66.1, 108.7, 116.9, 117.0, 123.8, 125.8, 126.2, 127.5, 127.6, 128.1, 128.4, 129.3, 137.4, 139.9, 149.4, 152.5, 172.3. IR (thin film):  $\nu_{\text{max}}$  ( $\text{cm}^{-1}$ ) = 3399, 2977, 2322, 1747, 1690, 1607, 1482, 1392, 1362, 1333, 1316, 1258, 1198, 1155, 1048, 1032, 994, 922, 899, 863, 780, 749, 701; HRMS (ESI) calcd for  $\text{C}_{26}\text{H}_{31}\text{N}_2\text{O}_4$   $[\text{M}+\text{H}]^+$ : 435.2278. Found: 435.2278.

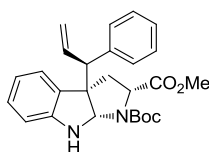

**trans-4ra.** Yellow oil, 62% yield.  $[\alpha]_{\text{D}}^{24} = -110.6$  ( $c = 1.0$ ,  $\text{CHCl}_3$ ).  $^1\text{H}$  NMR (600 MHz,  $d_6$ -DMSO, minor diastereomer indicated by \*)  $\delta$  1.39-1.44 (m, 9H), 2.41 (d,  $J = 13.2$  Hz, 1H), 2.71 (t,  $J = 12.0$  Hz, 1H), 3.16 (s, 3H), 3.63 (d,  $J = 4.8$  Hz, 1H), 4.29 (d,  $J = 5.4$  Hz, 1H), 5.08 (d,  $J = 16.8$  Hz, 1H), 5.12 (d,  $J = 8.4$  Hz, 1H\*), 5.14 (d,  $J = 10.2$  Hz, 1H), 5.28 (d,  $J = 17.4$  Hz, 1H\*), 5.37 (s, 1H), 6.00-6.06 (m, 1H\*), 6.31 (ddd,  $J = 10.2, 10.2, 18.6$  Hz, 1H), 6.52-6.54 (m, 2H), 6.70 (d,  $J = 7.2$  Hz, 1H), 6.98 (t,  $J = 7.8$  Hz, 1H), 7.01 (d,  $J = 3.0$  Hz, 2H), 7.23-7.26 (m, 3H).  $^{13}\text{C}$  NMR (100 MHz,  $d_6$ -DMSO)  $\delta$  27.7, 38.4, 50.8, 55.6, 58.7, 73.2, 79.2, 108.2, 112.9, 116.3, 116.7, 117.0, 123.7, 125.8, 126.2, 126.4, 127.5, 127.6, 128.0, 128.3, 128.6, 128.9, 137.7, 140.1, 141.8, 144.0, 150.4, 152.7, 170.9. IR (thin film):  $\nu_{\text{max}}$  ( $\text{cm}^{-1}$ ) = 3404, 2976, 2322, 1754, 1734, 1690, 1608, 1483, 1453, 1389, 1366, 1322, 1230, 1168, 1112, 1033, 994, 903, 863, 744, 720, 700; HRMS (ESI) calcd for  $\text{C}_{26}\text{H}_{31}\text{N}_2\text{O}_4$   $[\text{M}+\text{H}]^+$ : 435.2278. Found: 435.2279.

### Gram-scale synthesis of 4aa

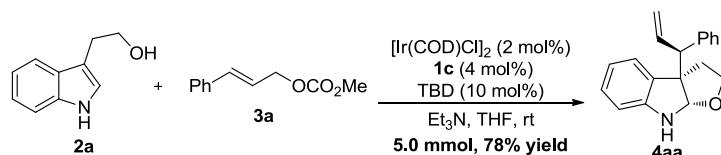

A flame-dried Schlenk tube was cooled to room temperature and filled with argon. To this flask were added  $[\text{Ir}(\text{COD})\text{Cl}]_2$  (67.1 mg, 0.10 mmol, 2.0 mol%), ( $R,R$ )-**1c** (92.2 mg, 0.20 mmol, 4.0 mol%), TBD (69.5 mg, 0.50 mmol, 10 mol%),

and THF (5.0 mL). The reaction mixture was stirred at room temperature for 10 min, yielding an orange solution. To another Schlenk tube were added tryptophol **2a** (1.61 g, 10.0 mmol, 200 mol%), cinnamyl methyl carbonate **3a** (960.0 mg, 5.0 mmol, 100 mol%), Et<sub>3</sub>N (505.0 mg, 5.0 mmol, 100 mol%), and THF (15 mL). Then, the above pre-formed catalyst solution was transferred to this tube. The reaction mixture was stirred at room temperature until allylic carbonate **3a** was fully consumed (monitored by TLC). Upon completion of the reaction, the mixture was concentrated under reduced pressure. The diastereoselectivity of **4aa** was determined by <sup>1</sup>H NMR of the crude reaction mixture. Then the residue was purified by silica gel column chromatography (PE/EA = 20/1) to afford the desired product **4aa** (1.08 g, 19/1 dr, 78% yield, 95% ee).

#### Procedure for the synthesis of **7**

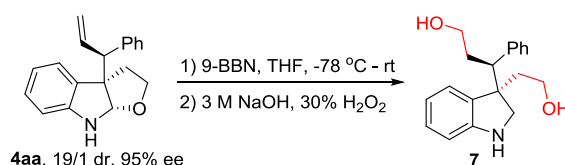

Compound **4aa** (170.4 mg, 0.62 mmol, 95% ee) was dissolved in degassed THF (4 mL) and then 9-BBN (6.0 mL, 0.5 M in THF, 3.0 mmol) was added at -78 °C. The reaction mixture was allowed to warm to room temperature slowly and stirred overnight. Then the reaction mixture was cooled to 0 °C, 3M aqueous NaOH (1.5 mL) solution was added. After 5 min, 30% H<sub>2</sub>O<sub>2</sub> (2.0 mL) was added by syringe. After 8 h, saturated aqueous Na<sub>2</sub>SO<sub>3</sub> solution was added, then the reaction mixture was extracted three times with Et<sub>2</sub>O (10.0 mL). The combined organic layers were washed with brine, dried over Na<sub>2</sub>SO<sub>4</sub>, filtered, and concentrated. The diastereoselectivity of **7** was determined by <sup>1</sup>H NMR of the crude reaction mixture. Then the residue was purified by silica gel column chromatography (PE:EA = 1:1) to give **7** as yellow oil in 45% yield (83.0 mg). The enantiomeric excess was determined by HPLC analysis [Daicel Chiralpak IC (0.46 cm x 25 cm), *n*-hexane/2-propanol = 80/20,  $\nu$  = 0.7 mL · min<sup>-1</sup>,  $\lambda$  = 230 nm, *t* (minor) = 25.62 min, *t* (major) = 27.46 min] to be 95%.  $[\alpha]_D^{24}$  = -9.9 (*c* = 1.0, CHCl<sub>3</sub>). <sup>1</sup>H NMR (400 MHz, CDCl<sub>3</sub>)  $\delta$  1.53 (dt, *J* = 4.0, 14.0

Hz, 1H), 1.67-1.74 (m, 1H), 1.85-1.91 (m, 2H), 3.04-3.11 (m, 1H), 3.19 (dd,  $J = 4.4$ , 9.6 Hz, 1H), 3.20-3.26 (m, 3H), 3.29-3.40 (m, 3H), 3.43-3.49 (m, 1H), 3.92 (d,  $J = 8.8$  Hz, 1H), 6.71 (d,  $J = 7.6$  Hz, 1H), 6.84 (dt,  $J = 0.8$ , 7.6 Hz, 1H), 7.00 (d,  $J = 7.6$  Hz, 1H), 7.10 (dt,  $J = 1.6$ , 8.0 Hz, 1H), 7.17-7.19 (m, 2H), 7.23-7.32 (m, 3H).  $^{13}\text{C}$  NMR (100 MHz,  $\text{CDCl}_3$ )  $\delta$  35.0, 44.0, 49.4, 52.5, 54.2, 60.0, 61.0, 110.7, 120.1, 123.2, 126.8, 127.9, 128.3, 128.9, 133.4, 141.5, 150.8. IR (thin film):  $\nu_{\text{max}}$  ( $\text{cm}^{-1}$ ) = 2963, 2361, 2337, 1261, 1091, 1020, 866, 798, 699; HRMS (ESI) calcd for  $\text{C}_{19}\text{H}_{24}\text{NO}_2$   $[\text{M}+\text{H}]^+$ : 298.1802. Found: 298.1802.

### Procedure for Pt/C catalyzed hydrogenation of compound 4aa

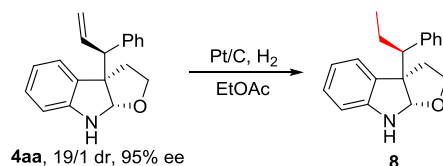

To a solution of **4aa** (164.2 mg, 0.59 mmol, 95% ee) in EtOAc (10.0 mL), Pt/C (63.7 mg, platinum on activated charcoal, 10% Pt basis, 5 mol%) was added. The reaction mixture was stirred under  $\text{H}_2$  atmosphere (1 atm) at room temperature for 24 h. After the reaction was complete (monitored by LC-MS), the crude reaction mixture was filtered with celite and washed with EtOAc. The solvents were removed under reduced pressure. Then the residue was purified by silica gel column chromatography (PE/EA = 9/1) to afford the desired product **8**. White solid, 132.4 mg, 80% yield, 95% ee [Daicel Chiralpak IC (0.46 cm x 25 cm), *n*-hexane/2-propanol = 98/2,  $\nu = 0.5$  mL  $\cdot$  min $^{-1}$ ,  $\lambda = 254$  nm,  $t$  (minor) = 28.95 min,  $t$  (major) = 36.78 min];  $[\alpha]_{\text{D}}^{24} = -32.4$  ( $c = 1.0$ ,  $\text{CHCl}_3$ , minor diastereomer indicated by \*).  $^1\text{H}$  NMR (400 MHz,  $\text{CDCl}_3$ )  $\delta$  0.70 (t,  $J = 7.2$  Hz, 3H), 1.87-1.97 (m, 2H), 2.19-2.22 (m, 2H), 2.72 (dd,  $J = 4.8$ , 10.4 Hz, 1H), 3.43-3.50 (m, 1H), 3.88-3.93 (m, 1H), 4.30 (br s, 1H), 5.35 (s, 1H), 6.44 (d,  $J = 7.6$  Hz, 1H), 6.56 (d,  $J = 8.4$  Hz, 1H\*), 6.66 (t,  $J = 7.6$  Hz, 1H\*), 6.72 (t,  $J = 7.6$  Hz, 1H), 6.84-6.86 (m, 2H), 7.01-7.06 (m, 2H), 7.10-7.14 (m, 3H).  $^{13}\text{C}$  NMR (100 MHz,  $\text{CDCl}_3$ )  $\delta$  12.7, 24.7, 39.5, 55.8, 62.3, 67.6, 96.6, 108.3, 118.3, 124.4, 126.5, 127.8, 128.2, 128.7, 130.6, 141.4, 150.6. IR (thin film):  $\nu_{\text{max}}$  ( $\text{cm}^{-1}$ ) = 3414, 3077, 3020, 2965, 2935, 2871, 1604, 1465, 1410, 1336, 1313, 1260, 1093, 1064, 1004, 966,

946, 877, 744, 708, 657; HRMS (ESI) calcd for C<sub>19</sub>H<sub>22</sub>NO [M+H]<sup>+</sup>: 280.1696. Found: 280.1701. mp = 93-97 °C.

### Procedure for the synthesis of **9**

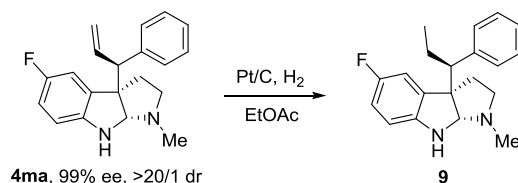

To a solution of **4ma** (71.8 mg, 0.20 mmol, 99% ee) in EtOAc (10.0 mL), Pt/C (12.0 mg, platinum on activated charcoal, 10% Pt basis, 5 mol%) was added. The reaction mixture was stirred under H<sub>2</sub> atmosphere (1 atm) at room temperature for 18 h. After the fully conversion of **4ma** (monitored by LC-MS), the crude reaction mixture was filtrated with celite and washed with EtOAc. The solvents were removed under reduced pressure. Then the residue was purified by silica gel column chromatography (EA/Et<sub>3</sub>N = 100/0.1) to afford the desired product **9**. White solid, 65.0 mg, 90% yield, 98% ee [Daicel Chiralpak AD-H (0.46 cm x 25 cm), *n*-hexane/2-propanol/Et<sub>2</sub>NH = 90/10/0.1,  $\nu$  = 0.5 mL · min<sup>-1</sup>,  $\lambda$  = 280 nm, t (major) = 9.00 min, t (minor) = 27.67 min]; [ $\alpha$ ]<sub>D</sub><sup>26</sup> = -40.1 (c = 1.0, CHCl<sub>3</sub>). <sup>1</sup>H NMR (400 MHz, CDCl<sub>3</sub>, minor diastereomer indicated by \*)  $\delta$  0.70 (t, *J* = 7.2 Hz, 3H), 1.82-1.96 (m, 2H), 2.05-2.11 (m, 1H), 2.21-2.27 (m, 1H), 2.32 (s, 3H), 2.39 (s, 3H\*), 2.49-2.64 (m, 3H), 3.54 (br s, 1H), 4.25 (s, 1H), 4.38 (s, 1H\*), 6.40 (dd, *J* = 4.4, 8.4 Hz, 1H), 6.72-6.78 (m, 2H), 6.83-6.85 (m, 2H), 7.15-7.16 (m, 3H). <sup>13</sup>C NMR (100 MHz, CDCl<sub>3</sub>)  $\delta$  12.8, 24.4, 37.0, 38.2, 52.5, 56.9, 62.4, 86.7, 110.3 (*J* = 8.1 Hz), 111.7 (*J* = 23.4 Hz), 114.0 (*J* = 23.1 Hz), 126.5, 127.8, 129.0, 135.8 (*J* = 7.1 Hz), 141.5, 147.0, 157.1 (*J* = 233.6 Hz). <sup>19</sup>F NMR (376 MHz, CDCl<sub>3</sub>)  $\delta$  -125.9. IR (thin film):  $\nu_{\text{max}}$  (cm<sup>-1</sup>) = 3144, 3073, 3027, 2957, 2928, 2863, 1602, 1487, 1450, 1350, 1254, 1186, 1161, 1111, 1023, 931, 899, 875, 797, 744, 699; HRMS (ESI) calcd for C<sub>20</sub>H<sub>24</sub>FN<sub>2</sub> [M+H]<sup>+</sup>: 311.1918. Found: 311.1916. mp = 88.6-90.9 °C.

## Determination of the absolute configuration

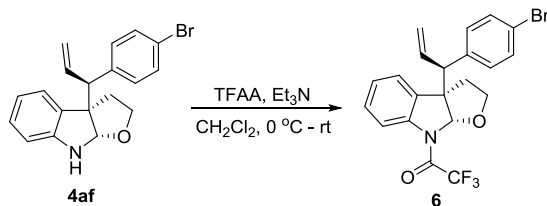

A flame-dried flask was charged with **4af** (340.8 mg, 0.96 mmol, 94% ee), Et<sub>3</sub>N (505.0 mg, 5.0 mmol) and CH<sub>2</sub>Cl<sub>2</sub> (20 mL), and then cooled to 0 °C. A solution of TFAA (425.0 mg, 2.02 mmol) in CH<sub>2</sub>Cl<sub>2</sub> (5 mL) was added dropwise to this flask. Then, the reaction mixture was stirred at room temperature. After the reaction was complete (monitored by TLC), The reaction mixture was quenched by saturated NaHCO<sub>3</sub> aqueous (15 mL), extracted with Et<sub>2</sub>O (25 mL x 3). The combined organic layers were washed with brine, separated, and dried over anhydrous Na<sub>2</sub>SO<sub>4</sub>. The solvent was evaporated, and the residue was purified by silica gel column chromatography (PE/EA = 40/1) to afford the desired product **6**. White solid, 84% yield, >99% ee (after recrystallization) [Daicel Chiralpak IC, *n*-hexane/2-propanol = 100/1,  $\nu$  = 1.0 mL·min<sup>-1</sup>,  $\lambda$  = 254 nm, t (minor) = 10.55 min, t (major) = 11.26 min];  $[\alpha]_D^{24}$  = +49.7 (c = 1.0, CHCl<sub>3</sub>). <sup>1</sup>H NMR (400 MHz, CDCl<sub>3</sub>)  $\delta$  2.32 (dd, *J* = 4.4, 12.0 Hz, 1H), 2.41 (dt, *J* = 7.6, 12.0 Hz, 1H), 2.47 (ddd, *J* = 4.8, 8.8, 11.6 Hz, 1H), 3.57 (d, *J* = 8.4 Hz, 1H), 4.05 (t, *J* = 8.0 Hz, 1H), 5.14 (d, *J* = 16.8 Hz, 1H), 5.25 (d, *J* = 10.0 Hz, 1H), 5.91 (d, *J* = 1.2 Hz, 1H), 6.24 (ddd, *J* = 8.8, 10.0, 16.8 Hz, 1H), 6.63 (d, *J* = 13.6 Hz, 2H), 7.11 (d, *J* = 7.2 Hz, 1H), 7.19-7.23 (m, 1H), 7.27 (d, *J* = 13.6 Hz, 2H), 7.32-7.37 (m, 1H), 8.06 (d, *J* = 8.4 Hz, 1H); <sup>13</sup>C NMR (100 MHz, CDCl<sub>3</sub>)  $\delta$  38.0, 56.5, 61.4, 69.0, 96.2, 115.7 (q, *J* = 287 Hz), 117.7, 118.6, 121.3, 124.6, 125.9, 129.4, 129.9, 131.4, 132.5, 135.9, 137.8, 142.4, 154.8 (q, *J* = 38.0 Hz). <sup>19</sup>F NMR (376 MHz, CDCl<sub>3</sub>)  $\delta$  -70.2. IR (thin film):  $\nu_{\max}$  (cm<sup>-1</sup>) = 2922, 2853, 1699, 1595, 1484, 1462, 1432, 1367, 1281, 1241, 1206, 1146, 1119, 1074, 1020, 928, 871, 823, 770, 725, 692; HRMS (ESI) calcd for C<sub>21</sub>H<sub>18</sub> BrF<sub>3</sub>NO<sub>2</sub> [M+H]<sup>+</sup>: 452.0468. Found: 452.0471. mp = 84.4-85.7 °C.

**X-ray analysis of 6:** In a round-bottom flask, **6** was dissolved in CH<sub>3</sub>OH. Then this solution was placed in refrigerator at -20 °C for one week. Colorless crystal containing CH<sub>3</sub>OH molecule was obtained and suitable for X-ray diffraction. A representative crystal was surveyed on a Bruker APEX diffractometer. All crystallographic calculations were facilitated by the SHELXL-97 system. (CCDC 1060973 contains the supplementary crystallographic data for **6**. These data can be obtained free of charge from the Cambridge Crystallographic Data Centre via [www.ccdc.cam.ac.uk /data request/cif.](http://www.ccdc.cam.ac.uk/data_request/cif))

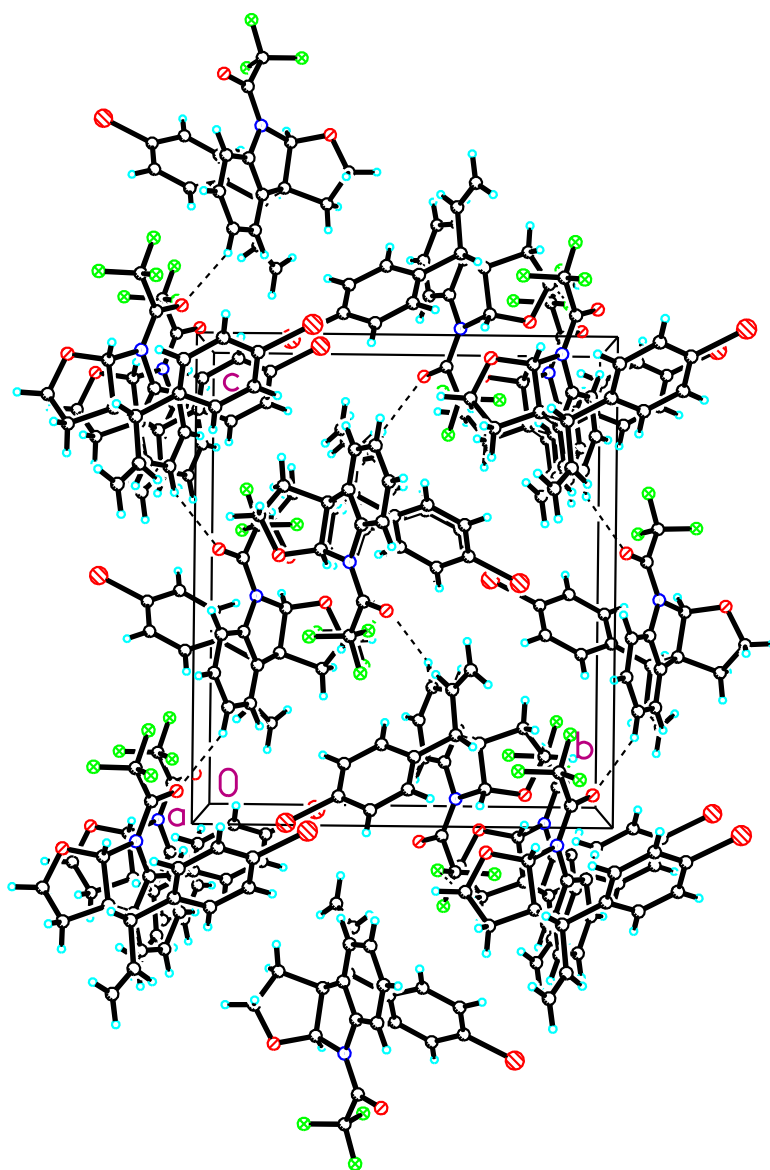

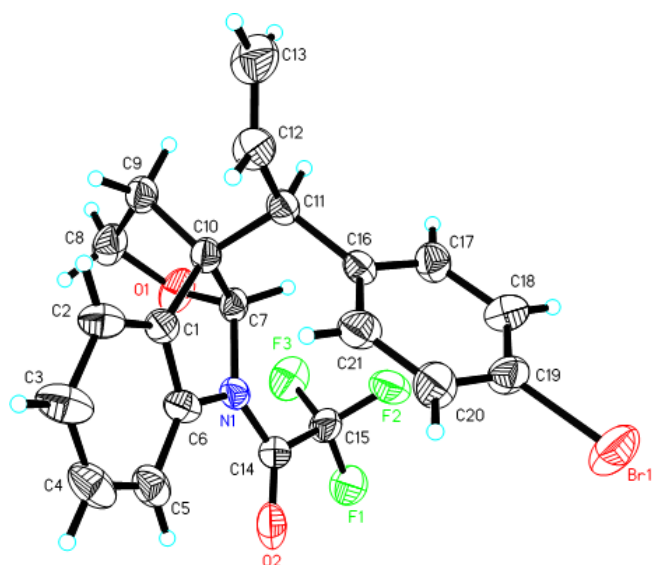

Table 1. Crystal data and structure refinement for cd212454.

|                             |                                                                                                                    |
|-----------------------------|--------------------------------------------------------------------------------------------------------------------|
| Identification code         | cd212454                                                                                                           |
| Empirical formula           | C <sub>21</sub> H <sub>17</sub> Br F <sub>3</sub> N O <sub>2</sub>                                                 |
| Formula weight              | 452.27                                                                                                             |
| Temperature                 | 293(2) K                                                                                                           |
| Wavelength                  | 0.71073 Å                                                                                                          |
| Crystal system, space group | Orthorhombic, P2(1)2(1)2(1)                                                                                        |
| Unit cell dimensions        | a = 9.1964(10) Å    alpha = 90 deg.<br>b = 13.4028(16) Å    beta = 90 deg.<br>c = 15.6110(17) Å    gamma = 90 deg. |
| Volume                      | 1924.2(4) Å <sup>3</sup>                                                                                           |
| Z, Calculated density       | 4, 1.561 Mg/m <sup>3</sup>                                                                                         |
| Absorption coefficient      | 2.181 mm <sup>-1</sup>                                                                                             |
| F(000)                      | 912                                                                                                                |
| Crystal size                | 0.212 x 0.143 x 0.101 mm                                                                                           |

|                                   |                                             |
|-----------------------------------|---------------------------------------------|
| Theta range for data collection   | 2.00 to 25.99 deg.                          |
| Limiting indices                  | -11<=h<=11, -14<=k<=16, -18<=l<=19          |
| Reflections collected / unique    | 11763 / 3776 [R(int) = 0.0602]              |
| Completeness to theta = 25.99     | 100.0 %                                     |
| Absorption correction             | Empirical                                   |
| Max. and min. transmission        | 1.00000 and 0.25258                         |
| Refinement method                 | Full-matrix least-squares on F <sup>2</sup> |
| Data / restraints / parameters    | 3776 / 0 / 253                              |
| Goodness-of-fit on F <sup>2</sup> | 0.946                                       |
| Final R indices [I>2sigma(I)]     | R1 = 0.0419, wR2 = 0.0797                   |
| R indices (all data)              | R1 = 0.0963, wR2 = 0.0953                   |
| Absolute structure parameter      | 0.000(11)                                   |
| Largest diff. peak and hole       | 0.293 and -0.174 e.A <sup>-3</sup>          |



Compound **4aa**'s  $^1\text{H}$  NMR Spectra

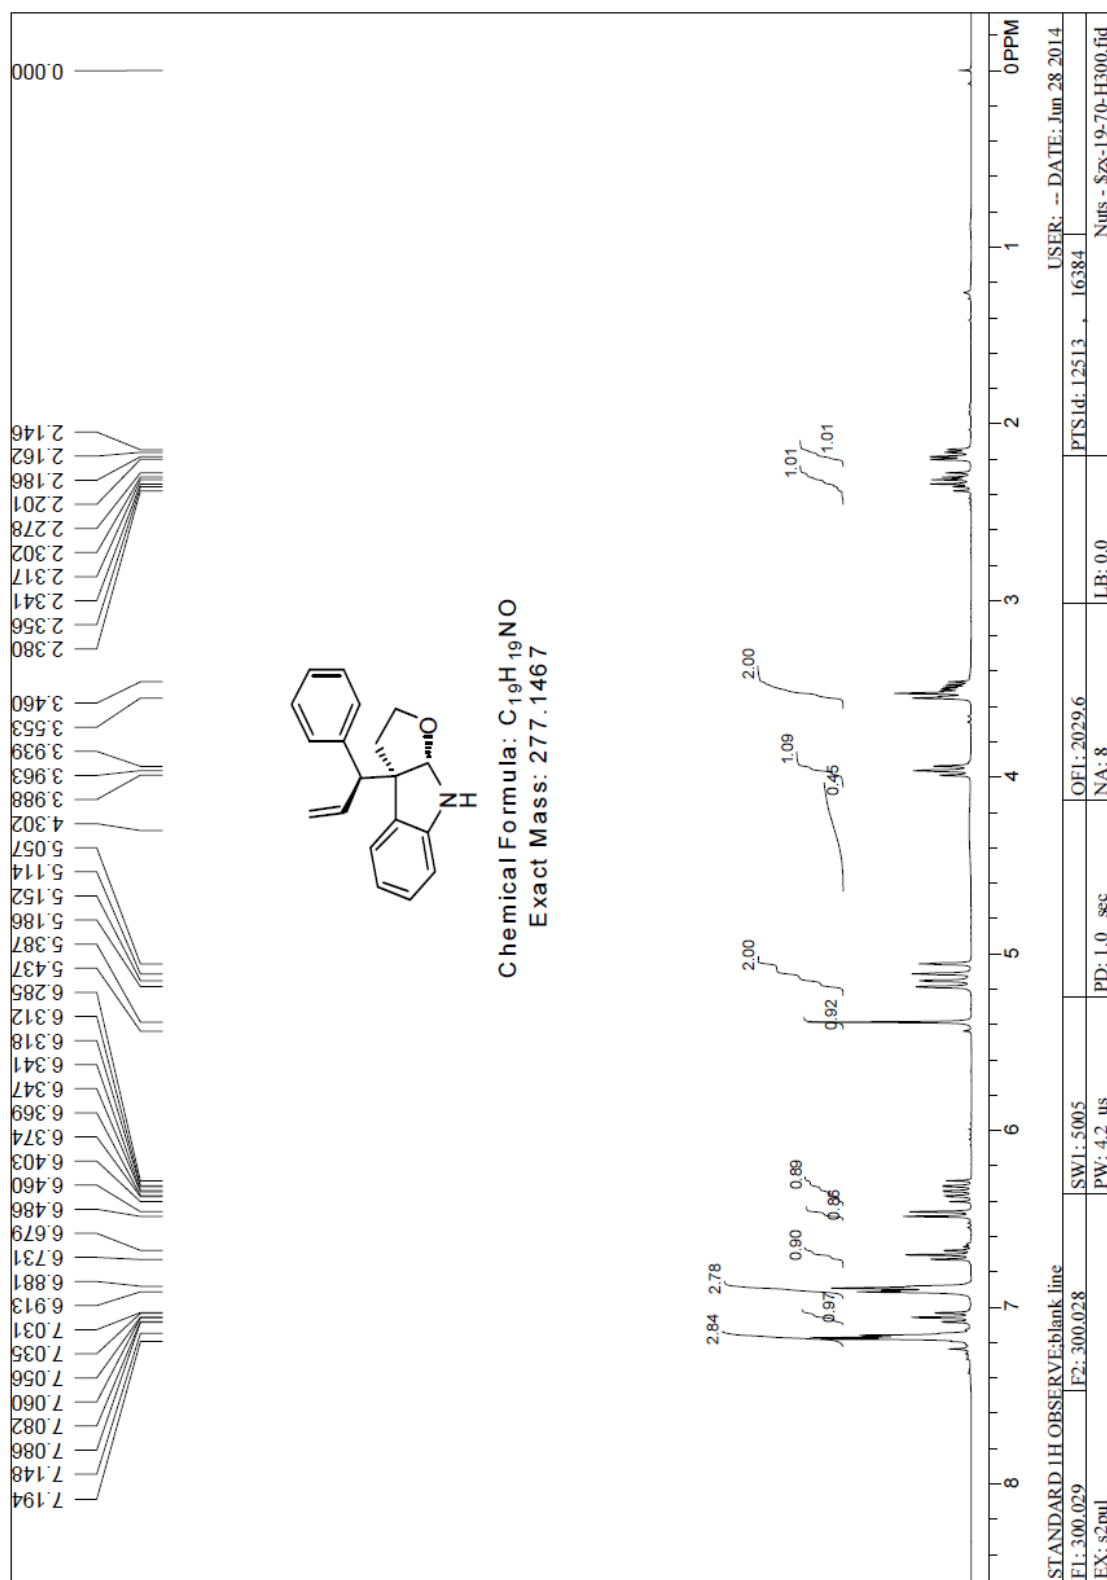

Compound **4aa**'s  $^{13}\text{C}$  NMR Spectra

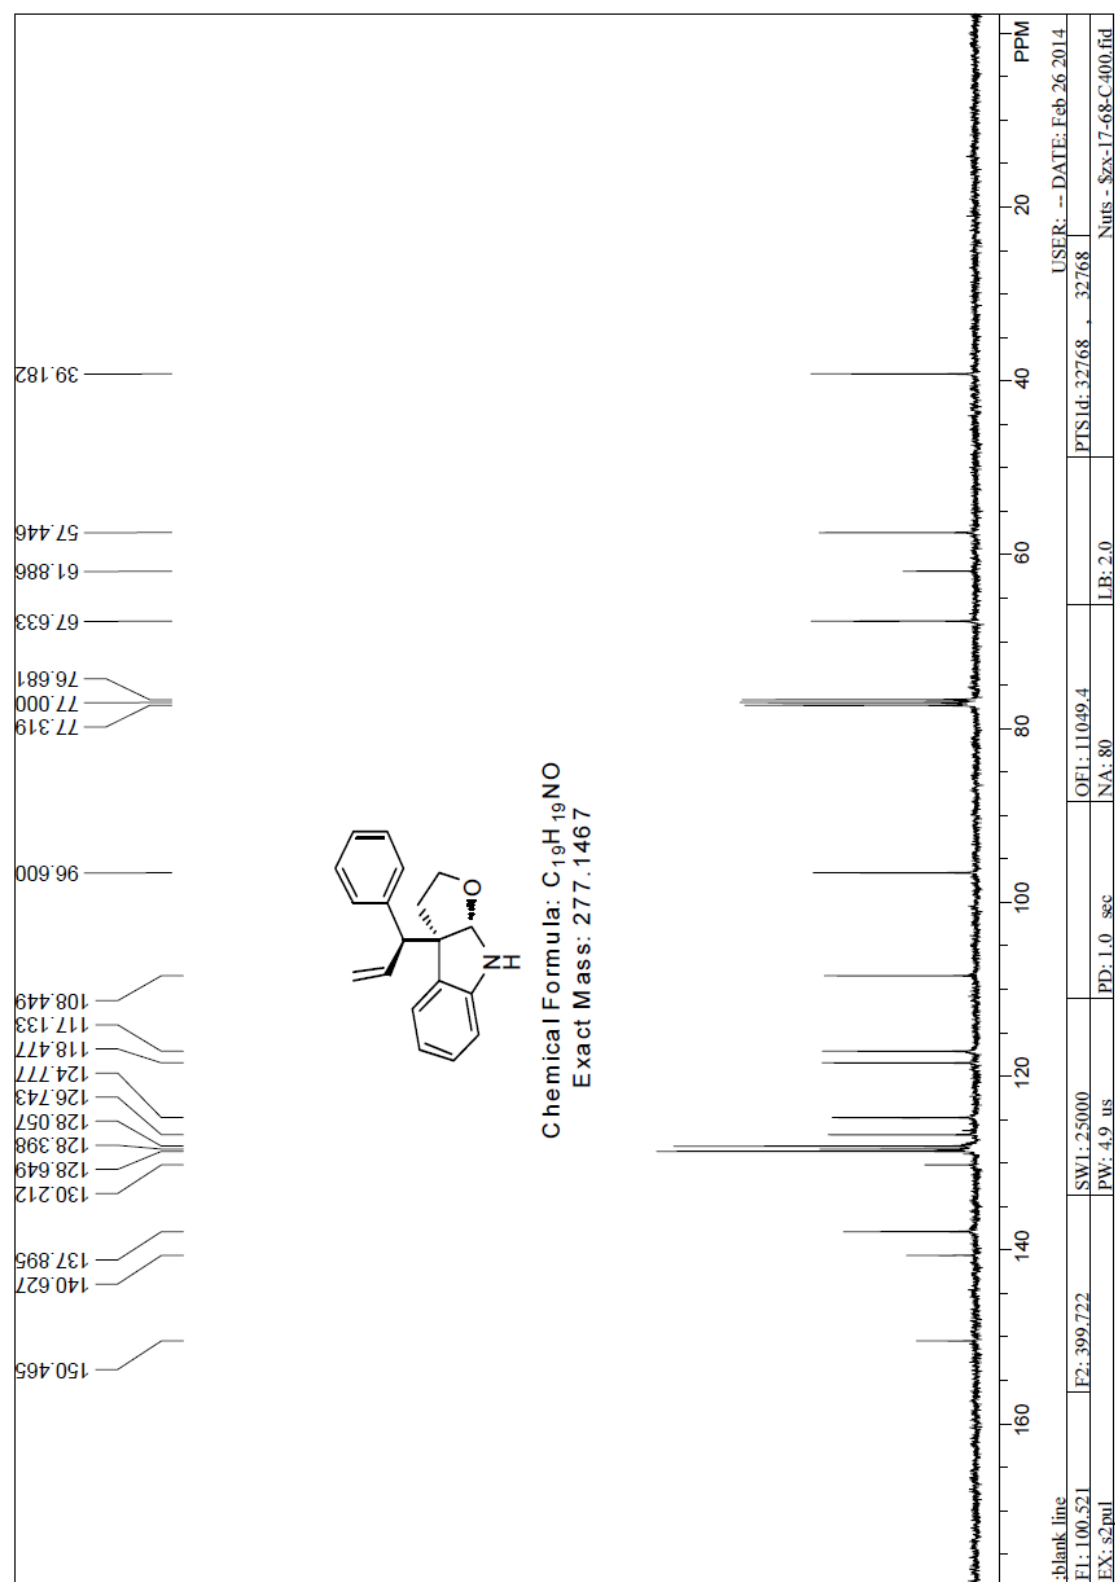

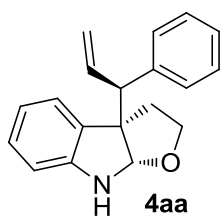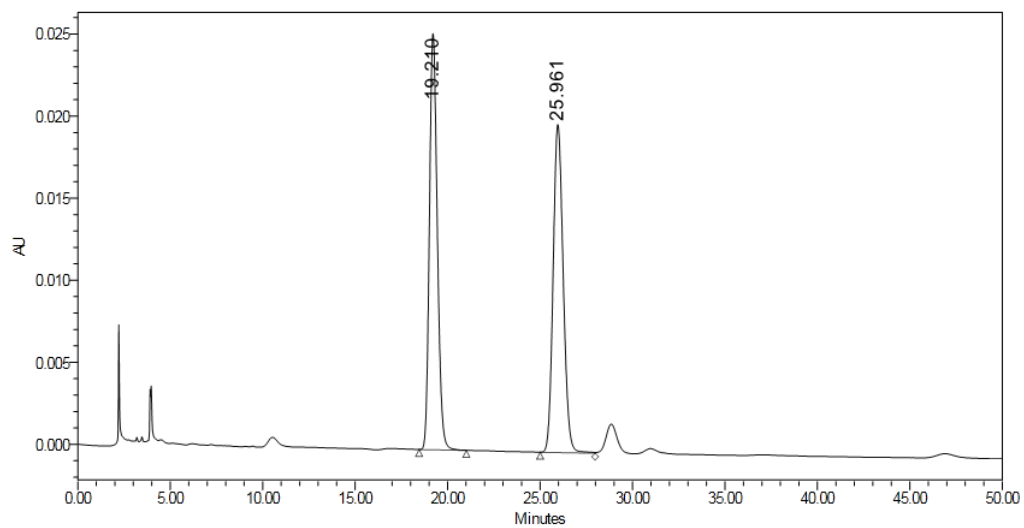

|   | RT<br>(min) | Area<br>(μV*sec) | % Area | Height<br>(μV) | % Height |
|---|-------------|------------------|--------|----------------|----------|
| 1 | 19.210      | 751290           | 49.80  | 25350          | 55.91    |
| 2 | 25.961      | 757291           | 50.20  | 19991          | 44.09    |

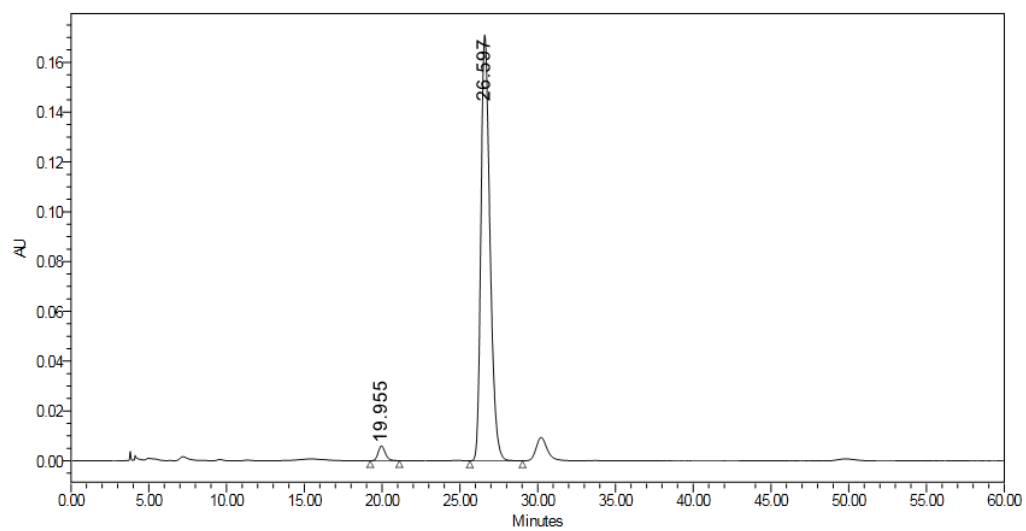

|   | RT<br>(min) | Area<br>(μV*sec) | % Area | Height<br>(μV) | % Height |
|---|-------------|------------------|--------|----------------|----------|
| 1 | 19.955      | 190041           | 2.67   | 5916           | 3.34     |
| 2 | 26.597      | 6917928          | 97.33  | 171004         | 96.66    |

Compound **4ab**'s  $^1\text{H}$  NMR Spectra

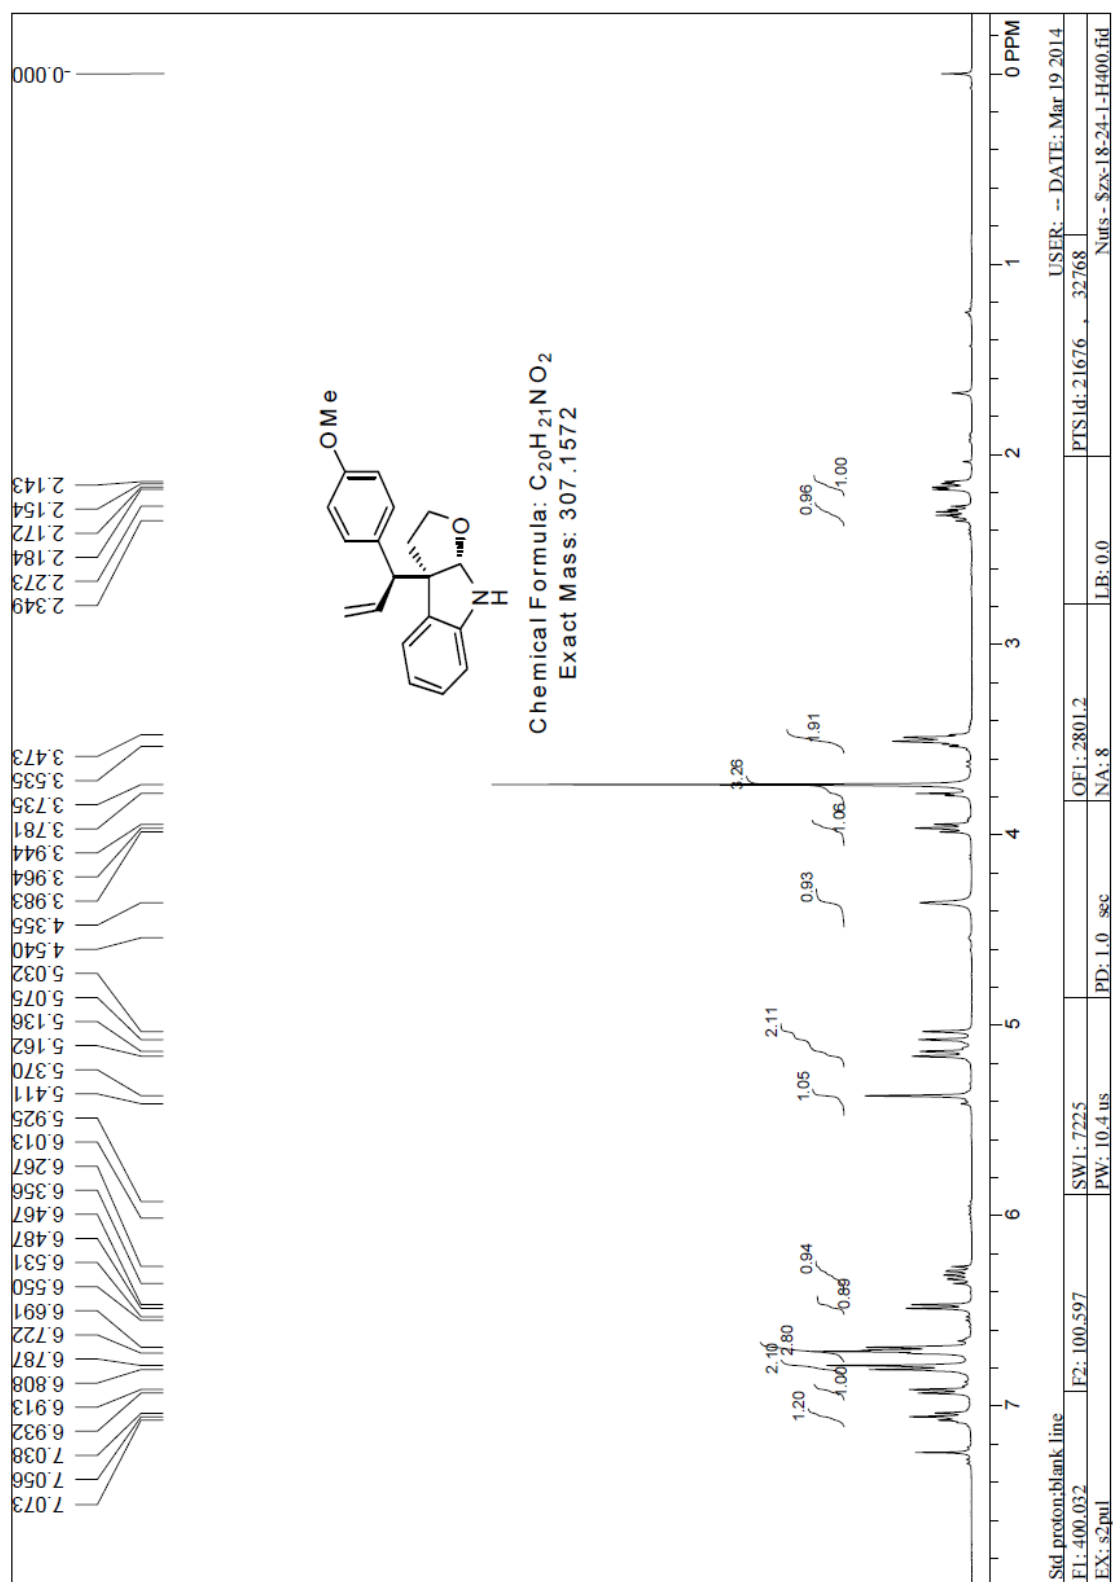

Compound **4ab**'s  $^{13}\text{C}$  NMR Spectra

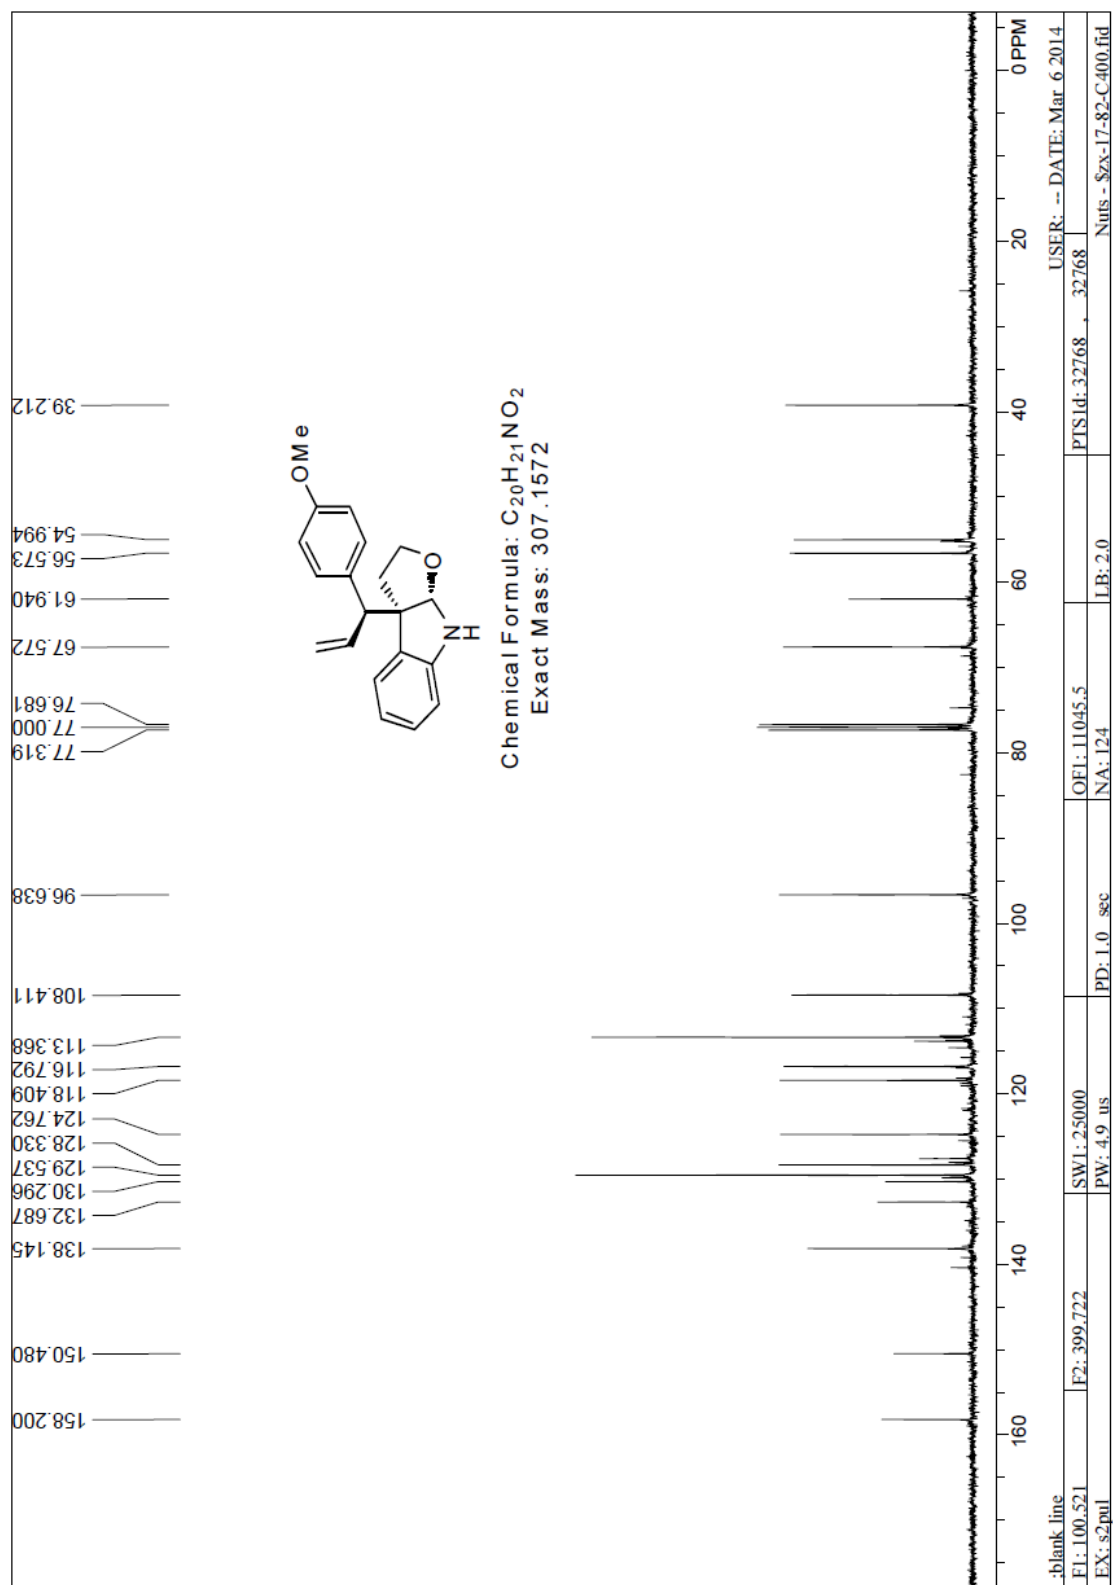

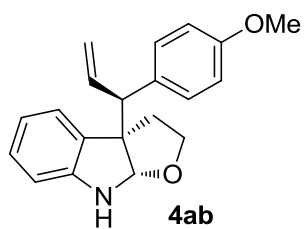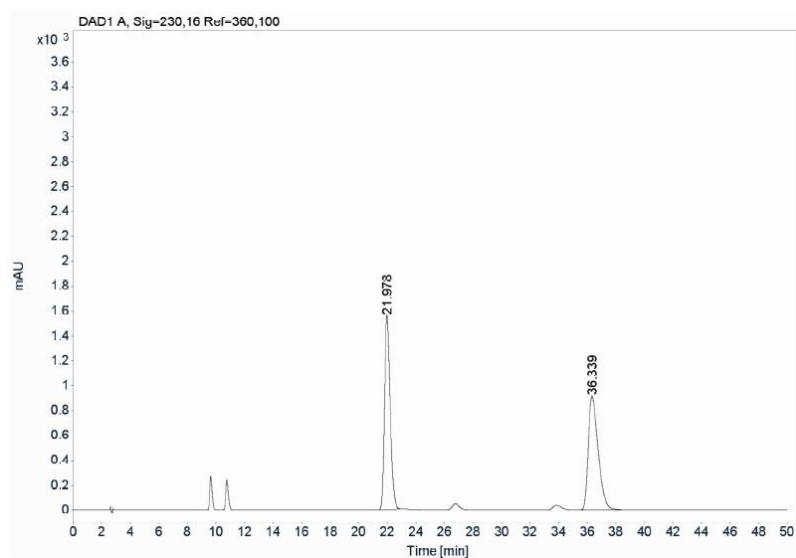

Signal: DAD1 A, Sig=230,16 Ref=360,100

| RT [min] | Type | Width [min] | Area       | Height    | Area%   |
|----------|------|-------------|------------|-----------|---------|
| 21.978   | BV   | 0.4225      | 42917.0703 | 1557.1534 | 49.3744 |
| 36.339   | BB   | 0.6951      | 44004.6602 | 913.3144  | 50.6256 |
|          |      | Sum         | 86921.7305 |           |         |

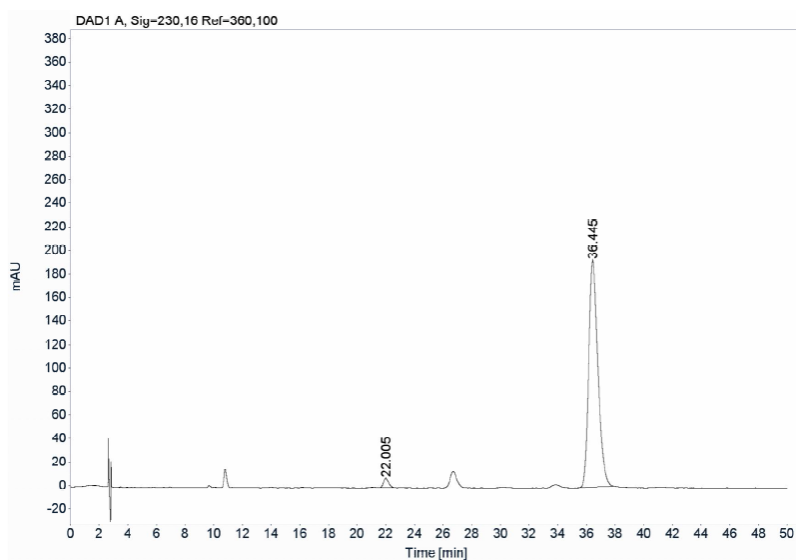

Signal: DAD1 A, Sig=230,16 Ref=360,100

| RT [min] | Type | Width [min] | Area      | Height   | Area%   |
|----------|------|-------------|-----------|----------|---------|
| 22.005   | BB   | 0.3022      | 193.0531  | 7.5778   | 2.1985  |
| 36.445   | BB   | 0.6119      | 8588.0537 | 192.3616 | 97.8015 |
|          |      | Sum         | 8781.1068 |          |         |

Compound **4ac**'s  $^1\text{H}$  NMR Spectra

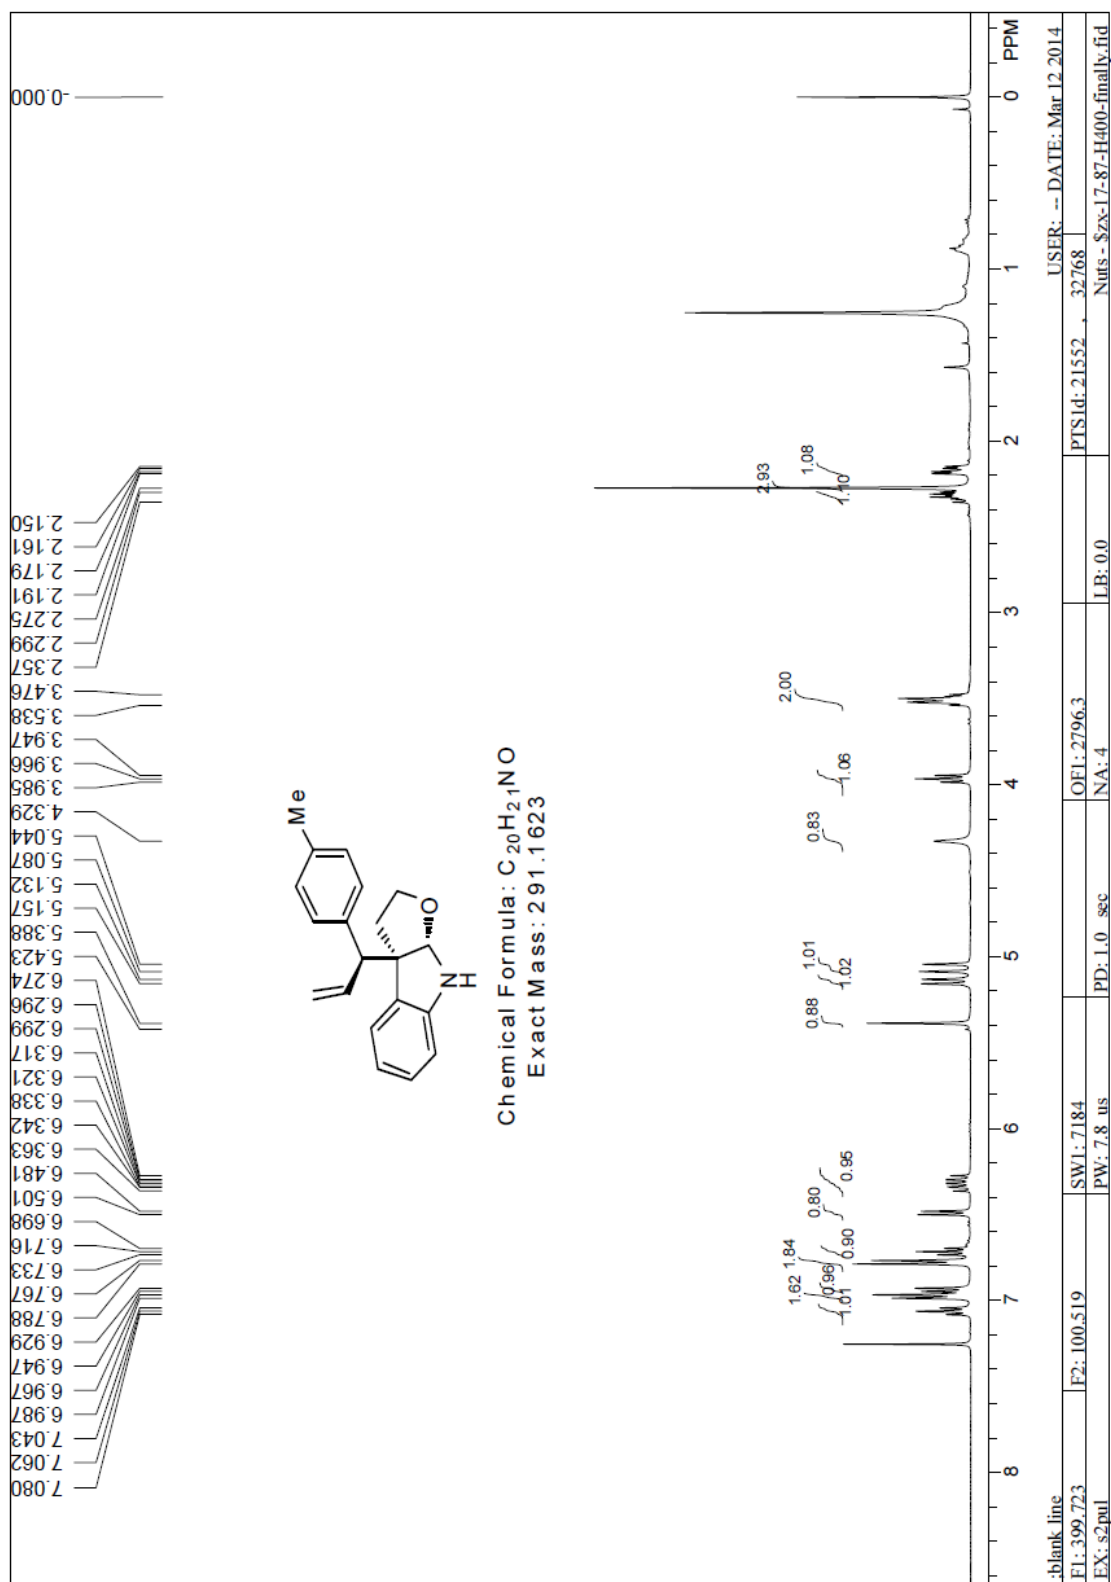

Compound **4ac**'s  $^{13}\text{C}$  NMR Spectra

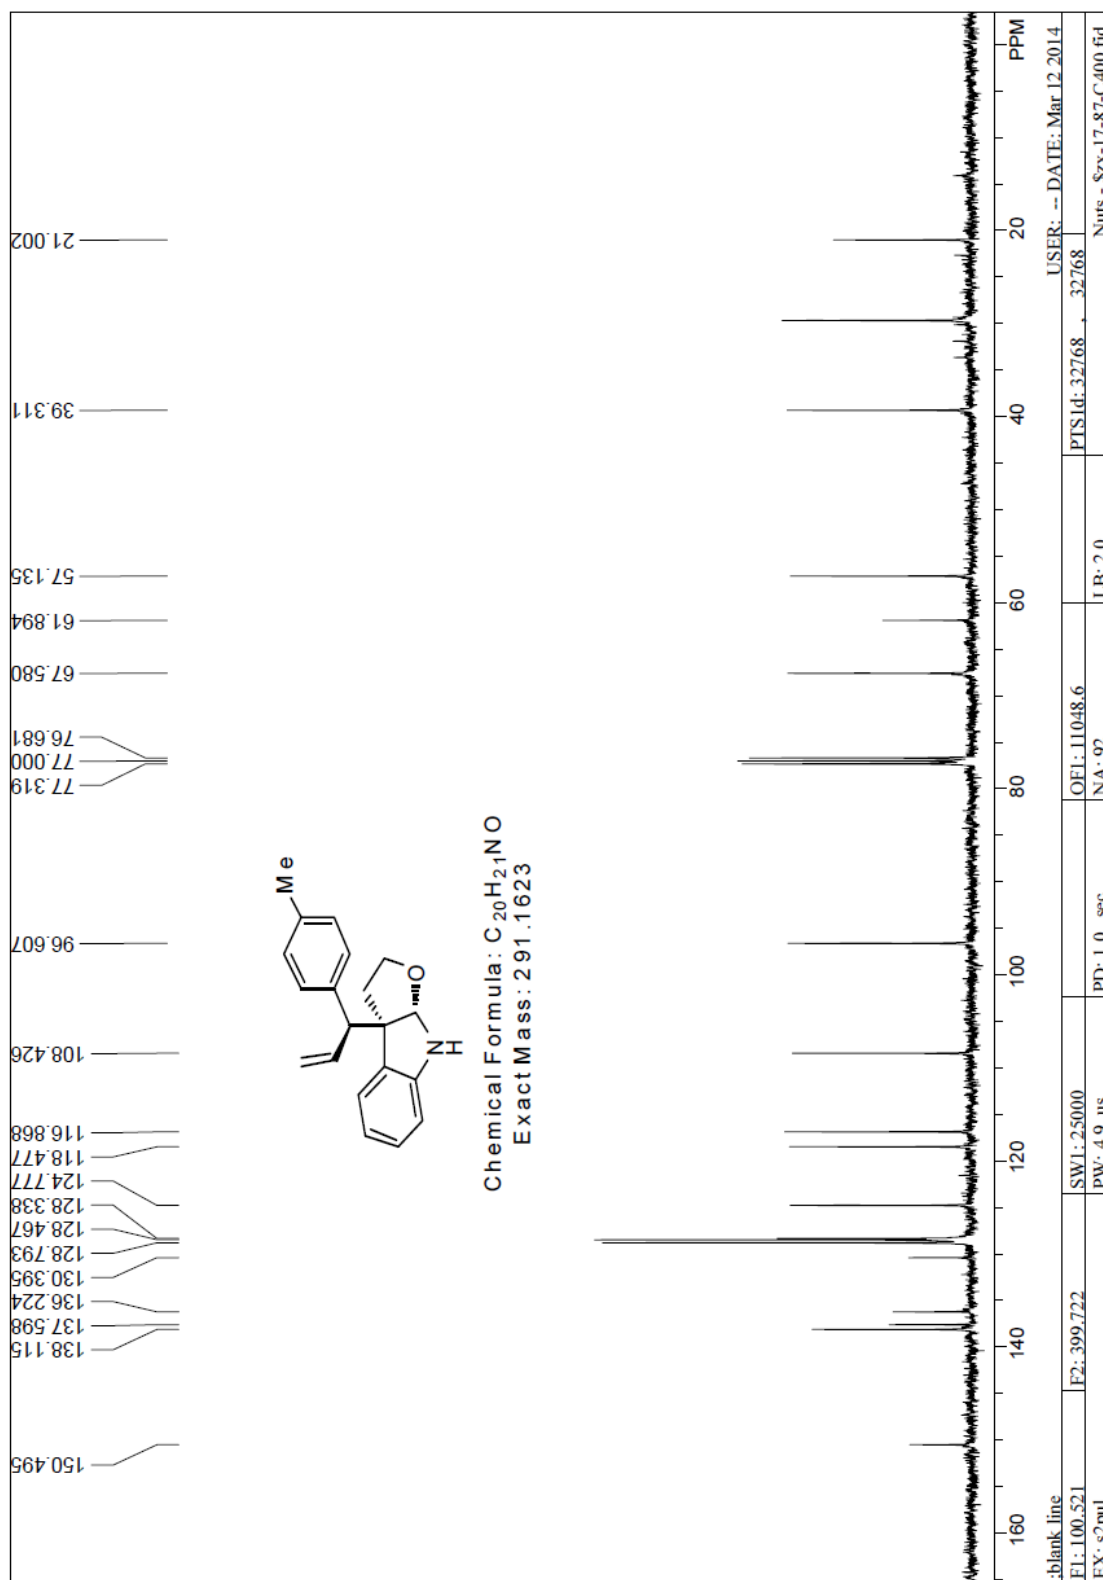



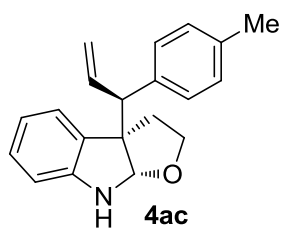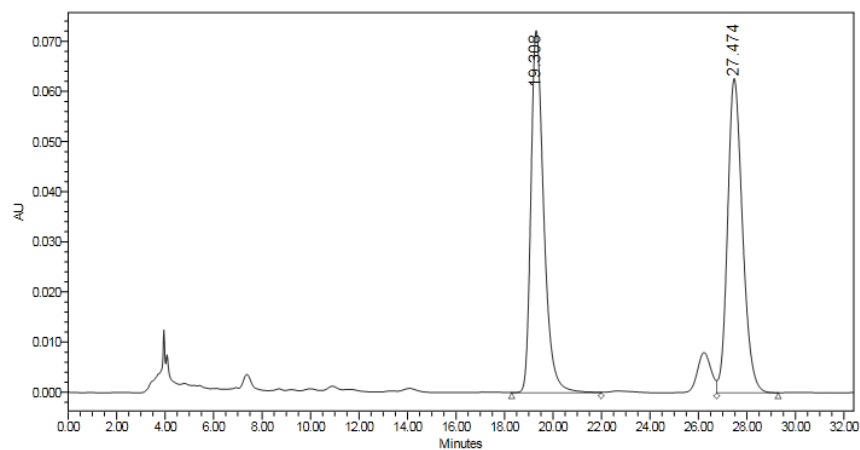

|   | RT<br>(min) | Area<br>( $\mu\text{V}\cdot\text{sec}$ ) | % Area | Height<br>( $\mu\text{V}$ ) | %<br>Height |
|---|-------------|------------------------------------------|--------|-----------------------------|-------------|
| 1 | 19.308      | 2657851                                  | 49.74  | 72193                       | 53.54       |
| 2 | 27.474      | 2685995                                  | 50.26  | 62655                       | 46.46       |

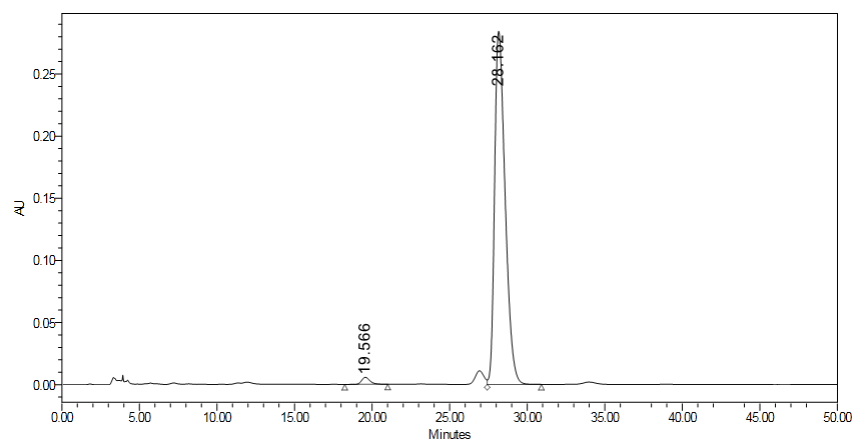

|   | RT<br>(min) | Area<br>( $\mu\text{V}\cdot\text{sec}$ ) | % Area | Height<br>( $\mu\text{V}$ ) | %<br>Height |
|---|-------------|------------------------------------------|--------|-----------------------------|-------------|
| 1 | 19.566      | 214327                                   | 1.57   | 5674                        | 1.96        |
| 2 | 28.162      | 13440920                                 | 98.43  | 284323                      | 98.04       |

Compound **4ad**'s  $^1\text{H}$  NMR Spectra

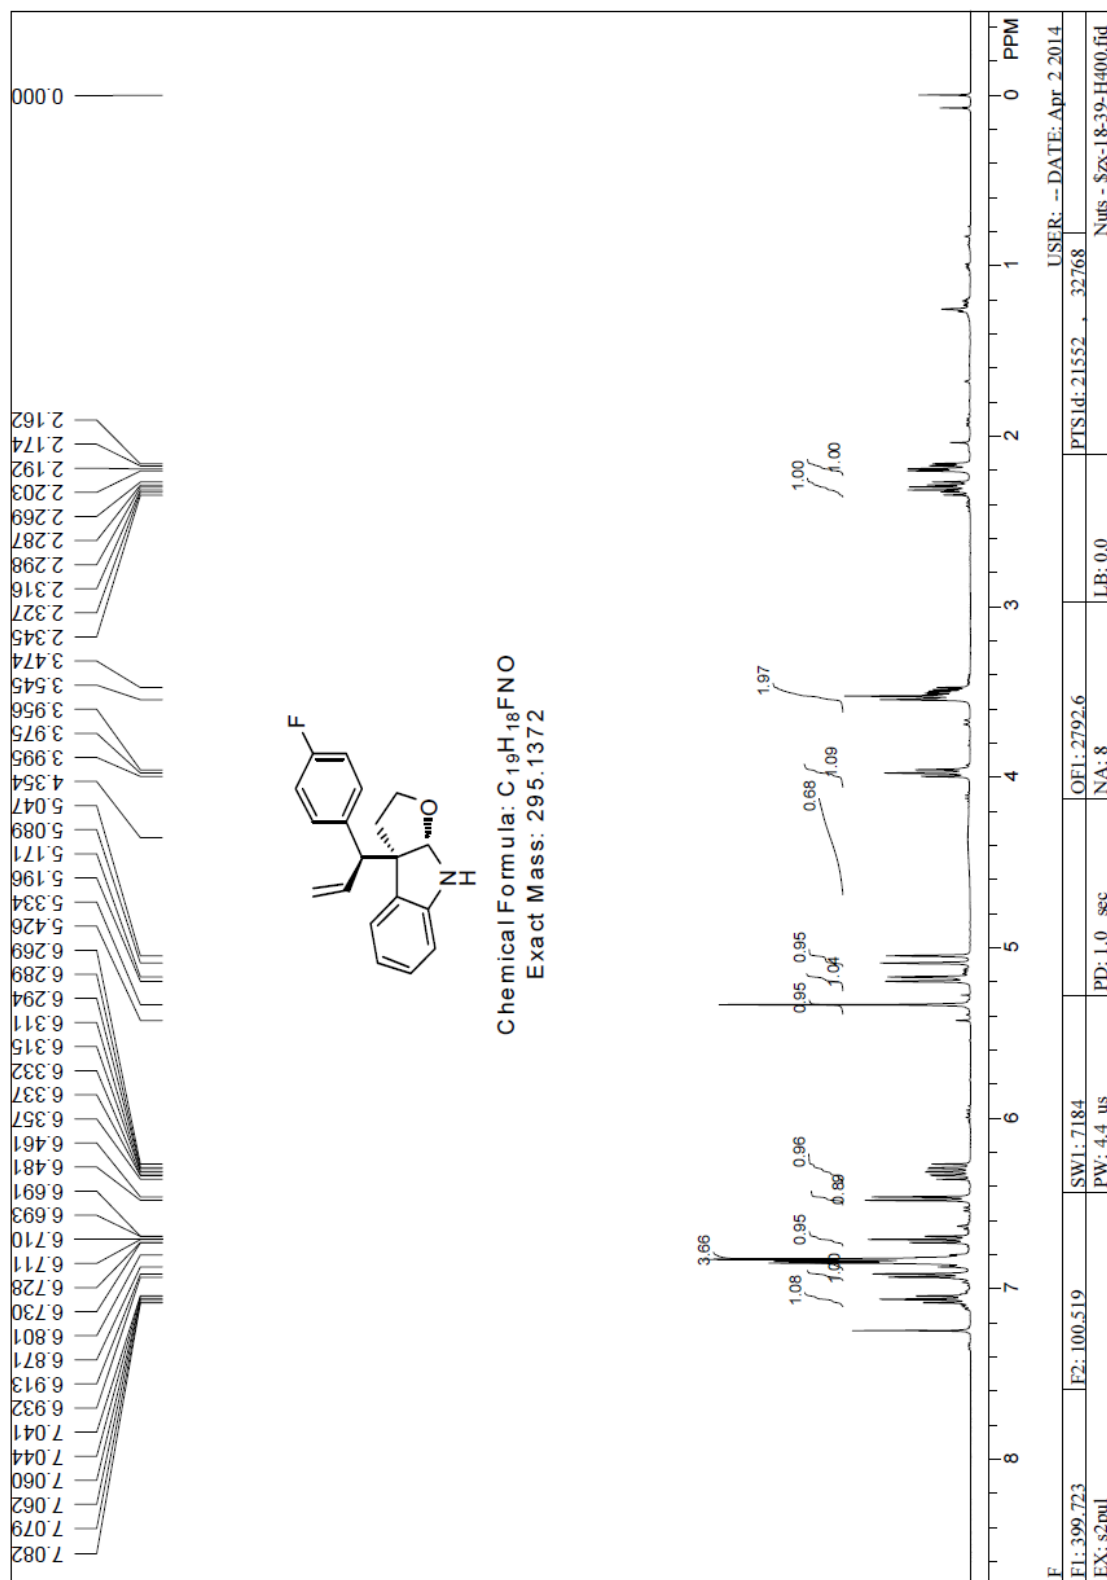

Compound **4ad**'s  $^{13}\text{C}$  NMR Spectra

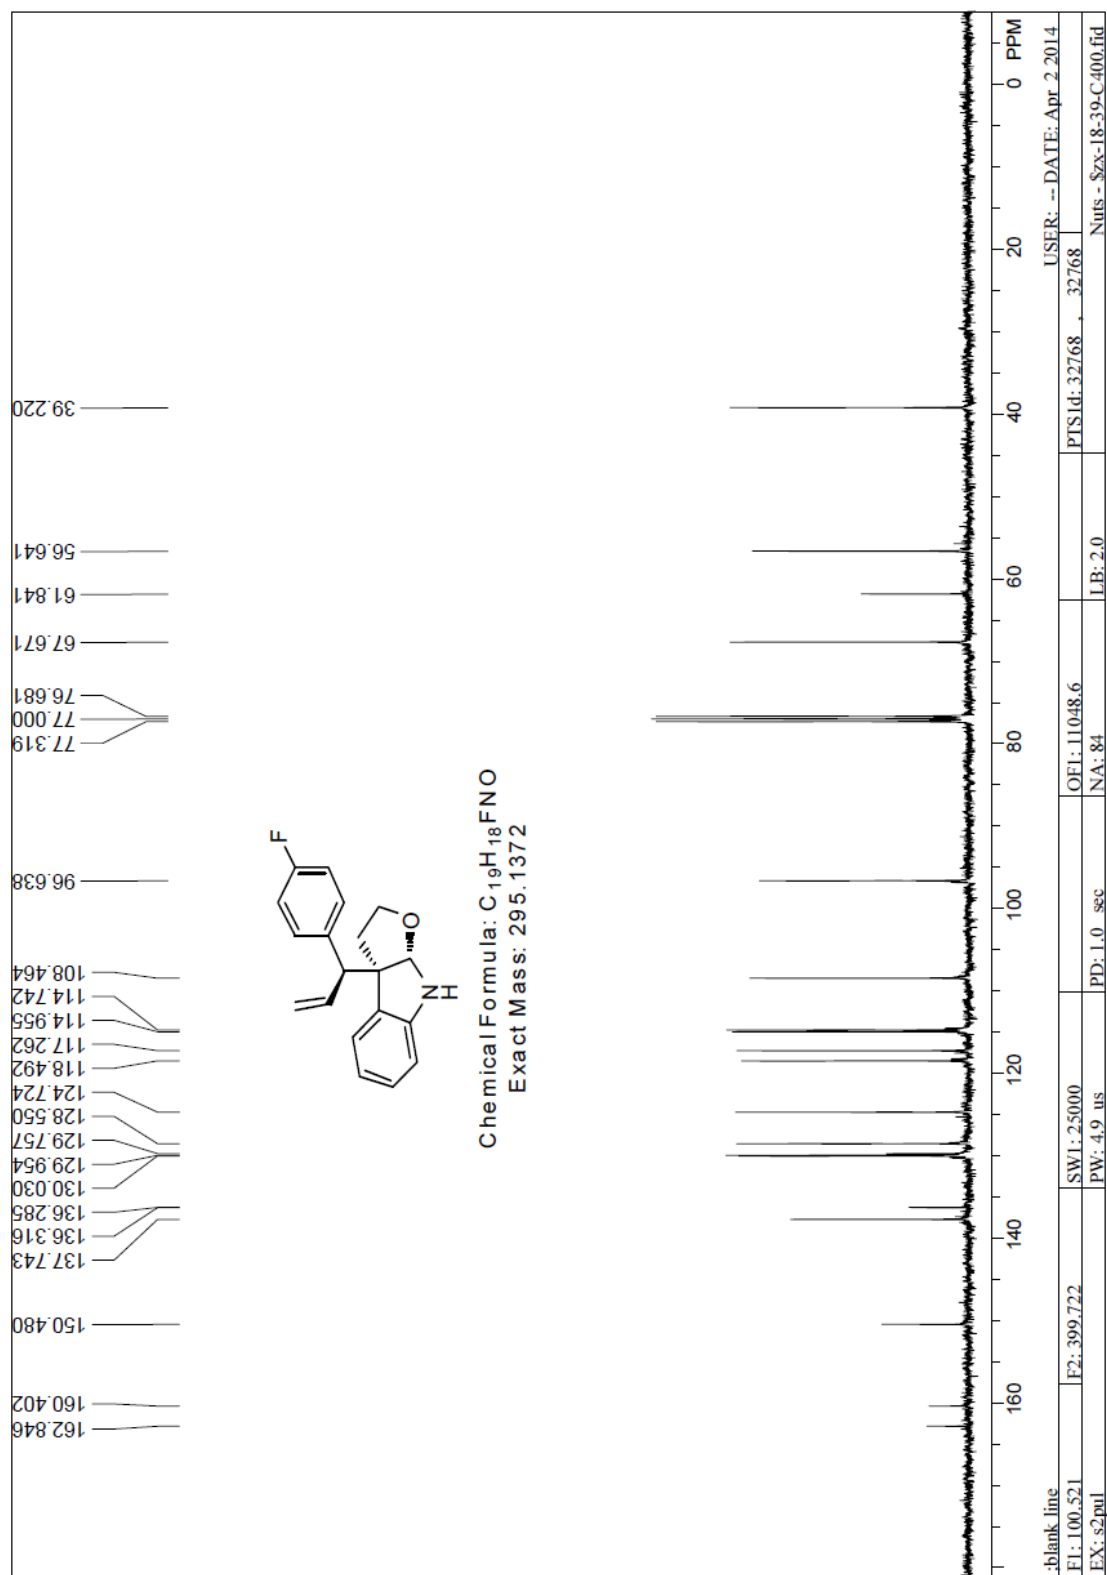

Compound **4ad**'s  $^{19}\text{F}$  NMR Spectra

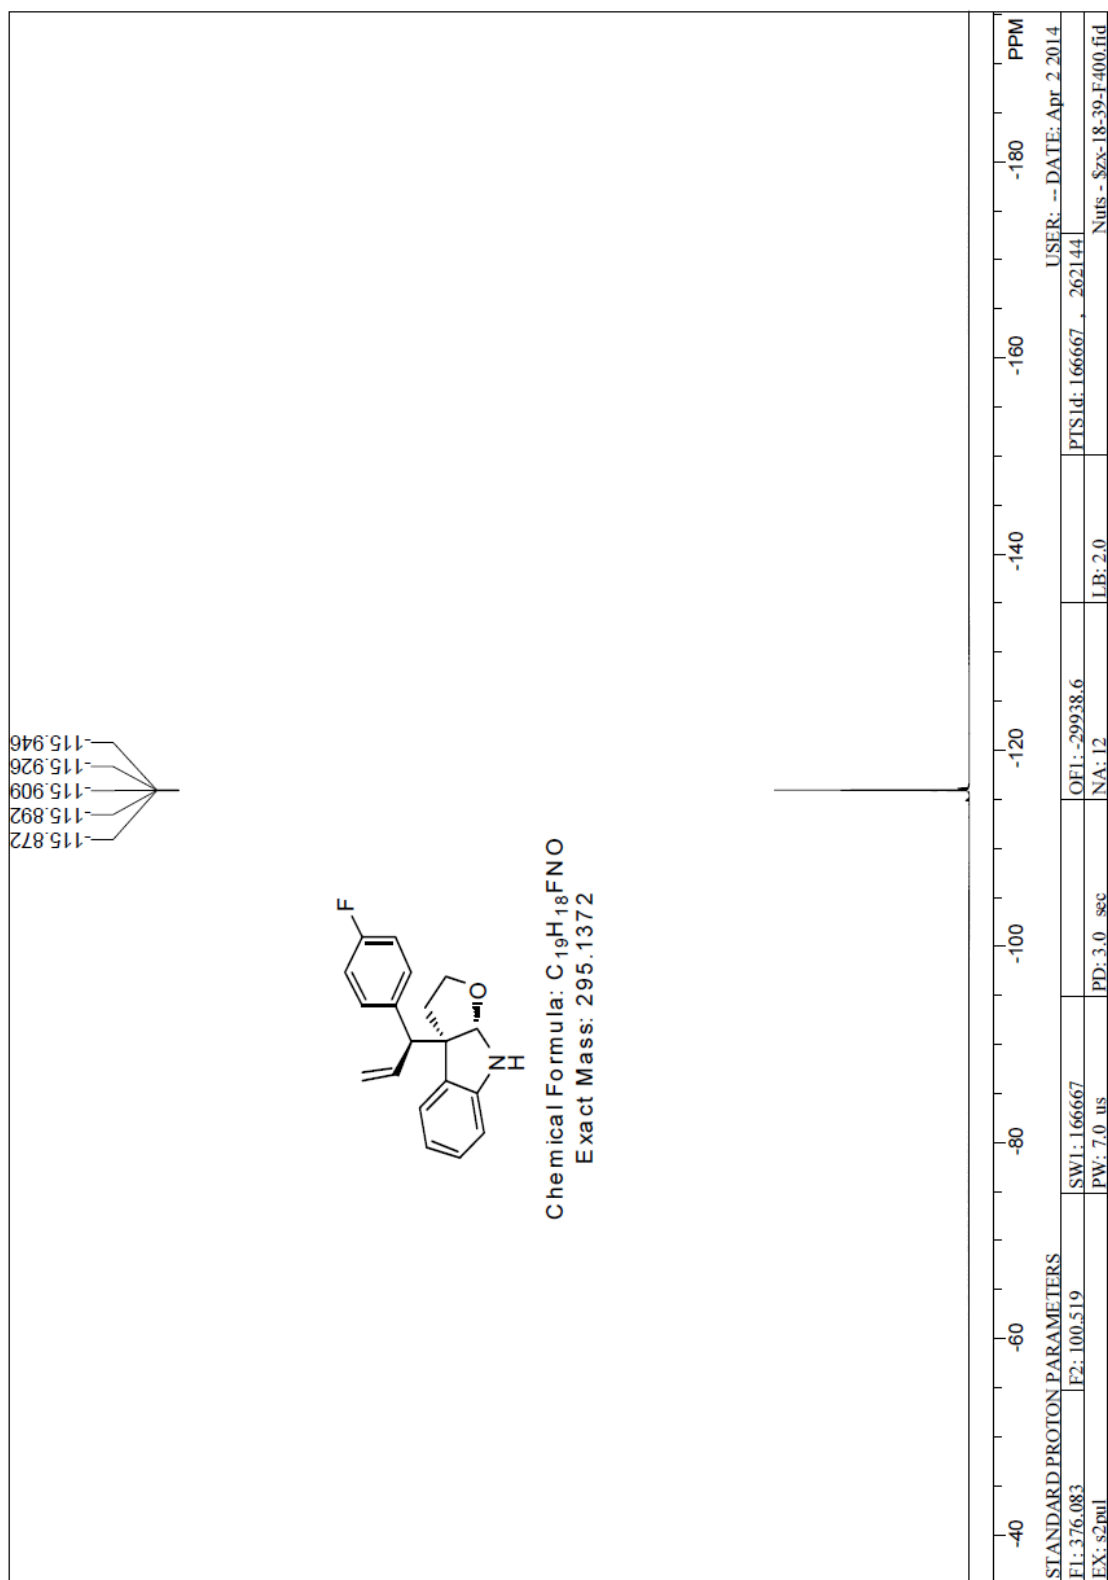

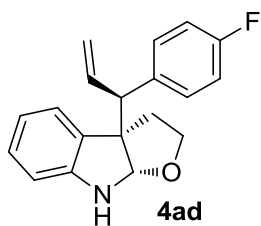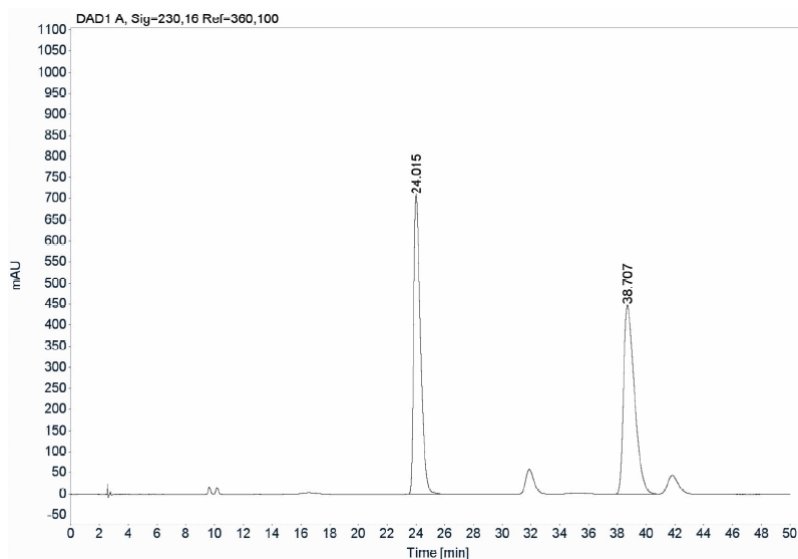

Signal: DAD1 A, Sig=230,16 Ref=360,100

| RT [min] | Type | Width [min] | Area       | Height   | Area%   |
|----------|------|-------------|------------|----------|---------|
| 24.015   | BB   | 0.4991      | 23308.0918 | 706.2087 | 49.9011 |
| 38.707   | BB   | 0.7776      | 23400.4629 | 445.6608 | 50.0989 |
|          |      | Sum         | 46708.5547 |          |         |

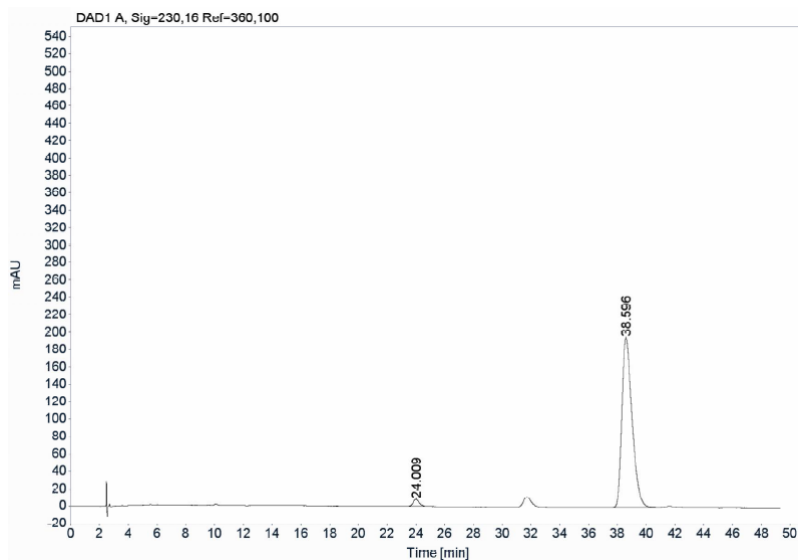

Signal: DAD1 A, Sig=230,16 Ref=360,100

| RT [min] | Type | Width [min] | Area      | Height   | Area%   |
|----------|------|-------------|-----------|----------|---------|
| 24.009   | BB   | 0.3472      | 232.5868  | 7.9521   | 2.3623  |
| 38.596   | BB   | 0.7299      | 9613.2305 | 195.0719 | 97.6377 |
|          |      | Sum         | 9845.8172 |          |         |

Compound **4ae**'s  $^1\text{H}$  NMR Spectra

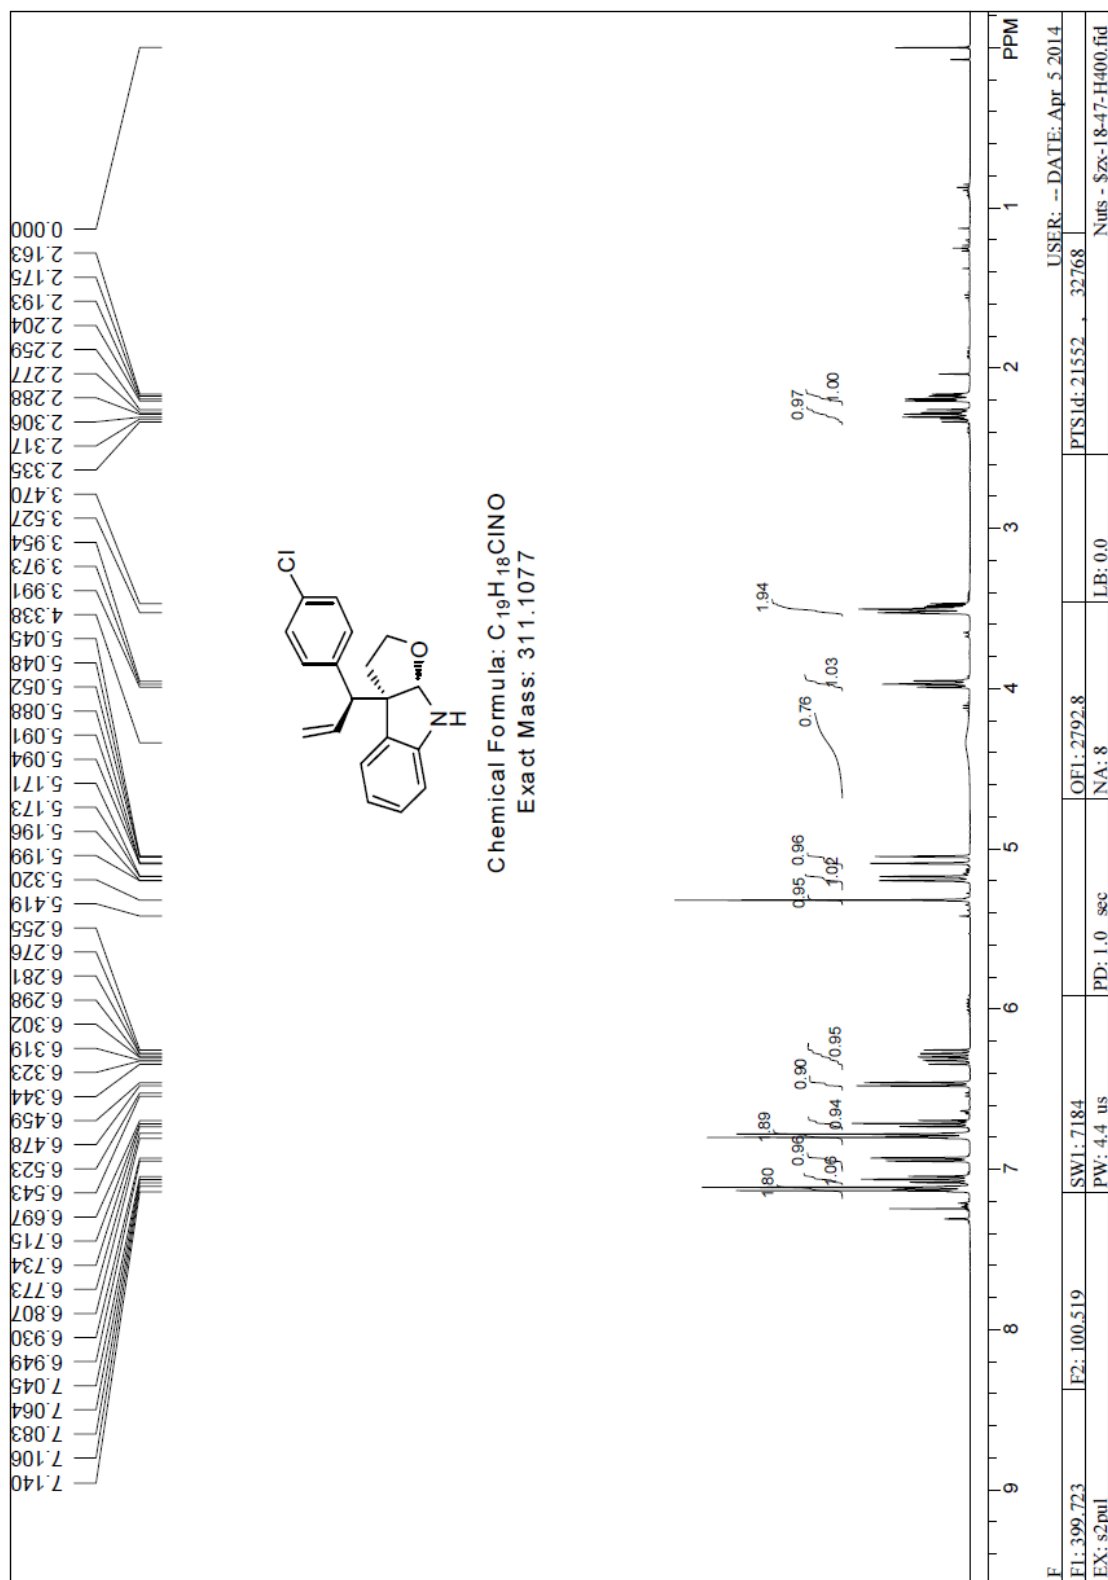

Compound **4ae**'s  $^{13}\text{C}$  NMR Spectra

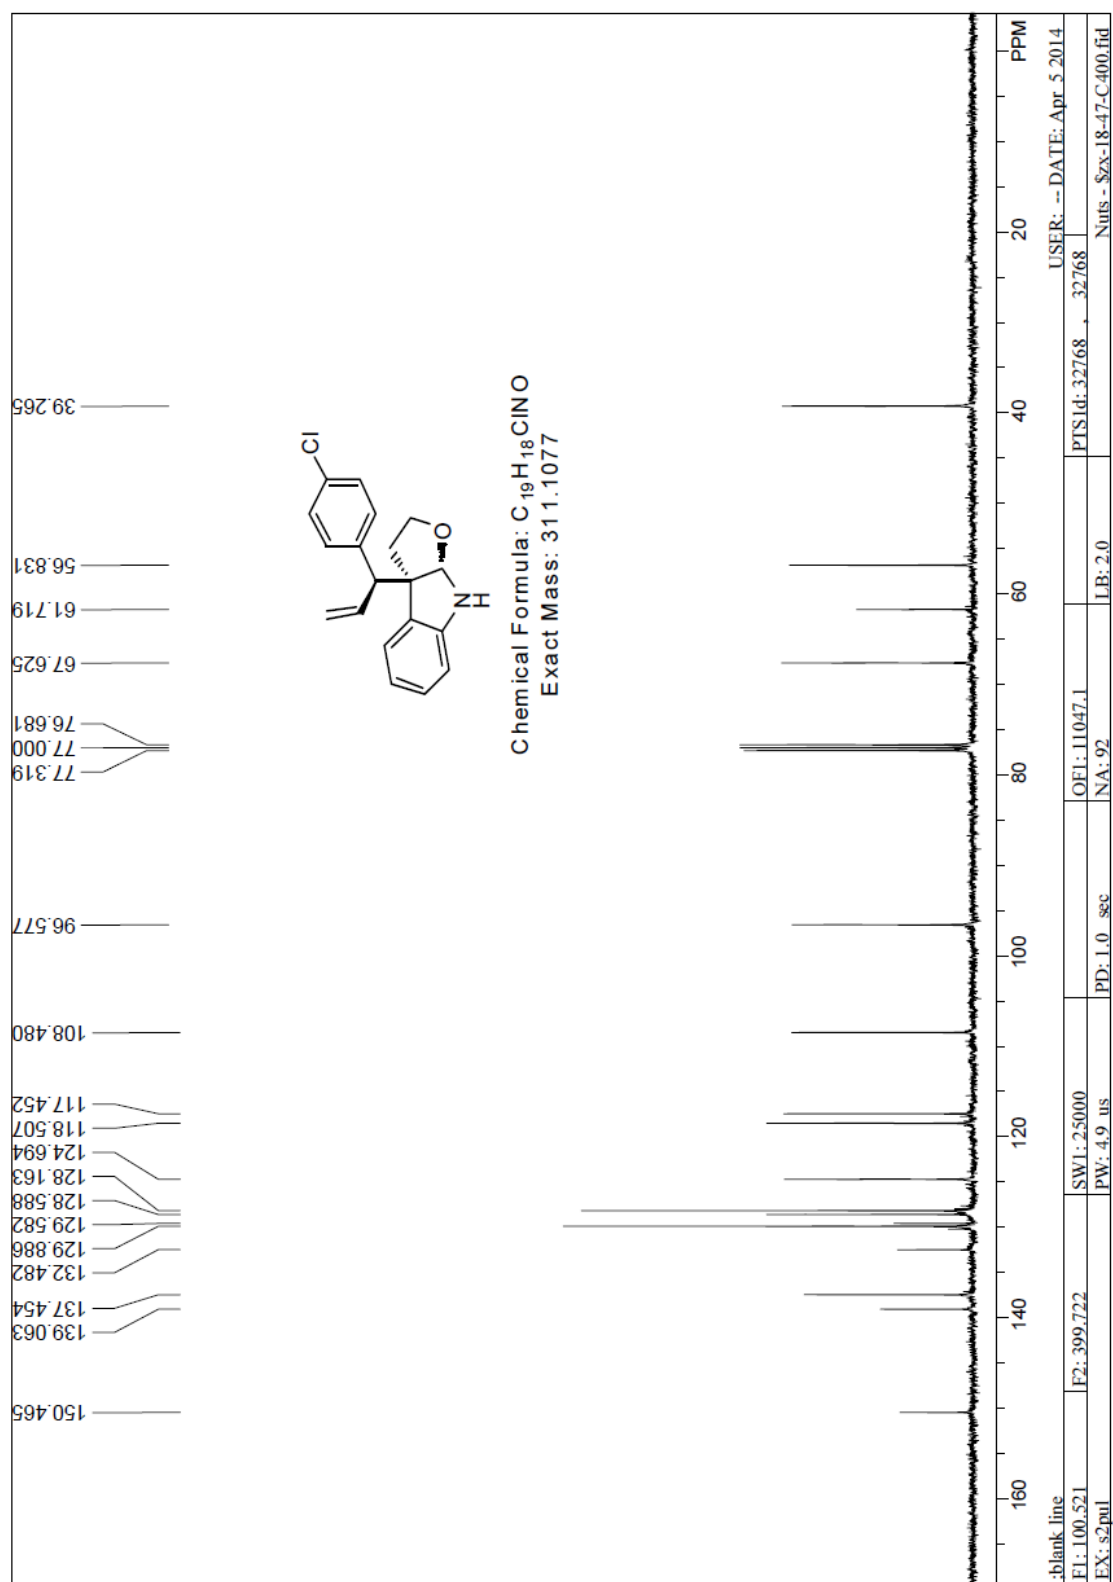

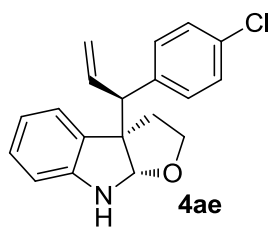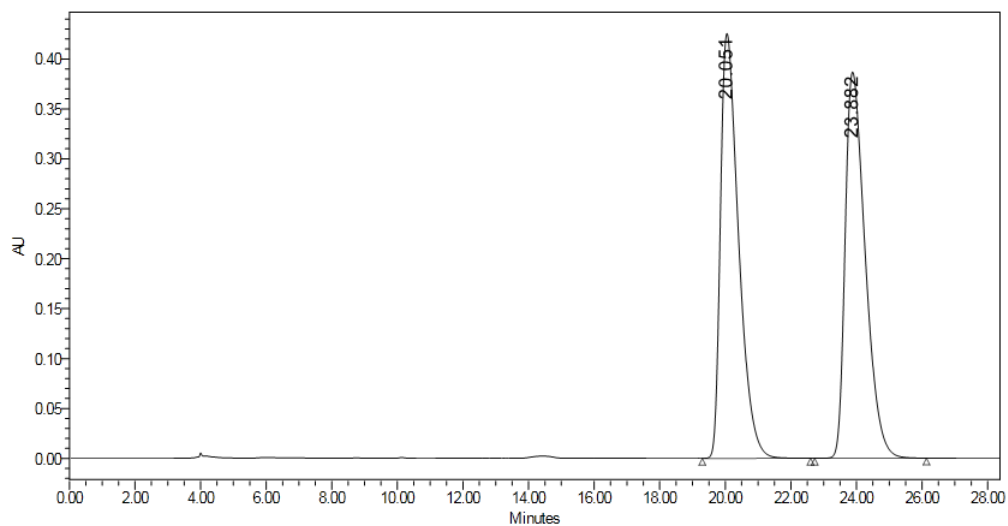

|   | RT<br>(min) | Area<br>(μV*sec) | % Area | Height<br>(μV) | %<br>Height |
|---|-------------|------------------|--------|----------------|-------------|
| 1 | 20.051      | 16356978         | 49.88  | 425374         | 52.38       |
| 2 | 23.882      | 16432981         | 50.12  | 386676         | 47.62       |

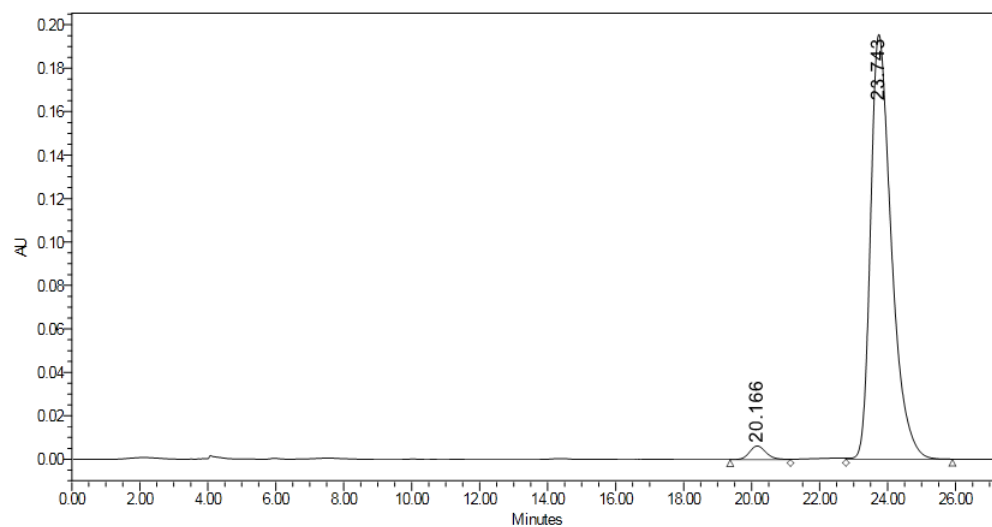

|   | RT<br>(min) | Area<br>(μV*sec) | % Area | Height<br>(μV) | %<br>Height |
|---|-------------|------------------|--------|----------------|-------------|
| 1 | 20.166      | 210953           | 2.47   | 6267           | 3.11        |
| 2 | 23.743      | 8324311          | 97.53  | 195575         | 96.89       |



Compound **4af**'s  $^1\text{H}$  NMR Spectra

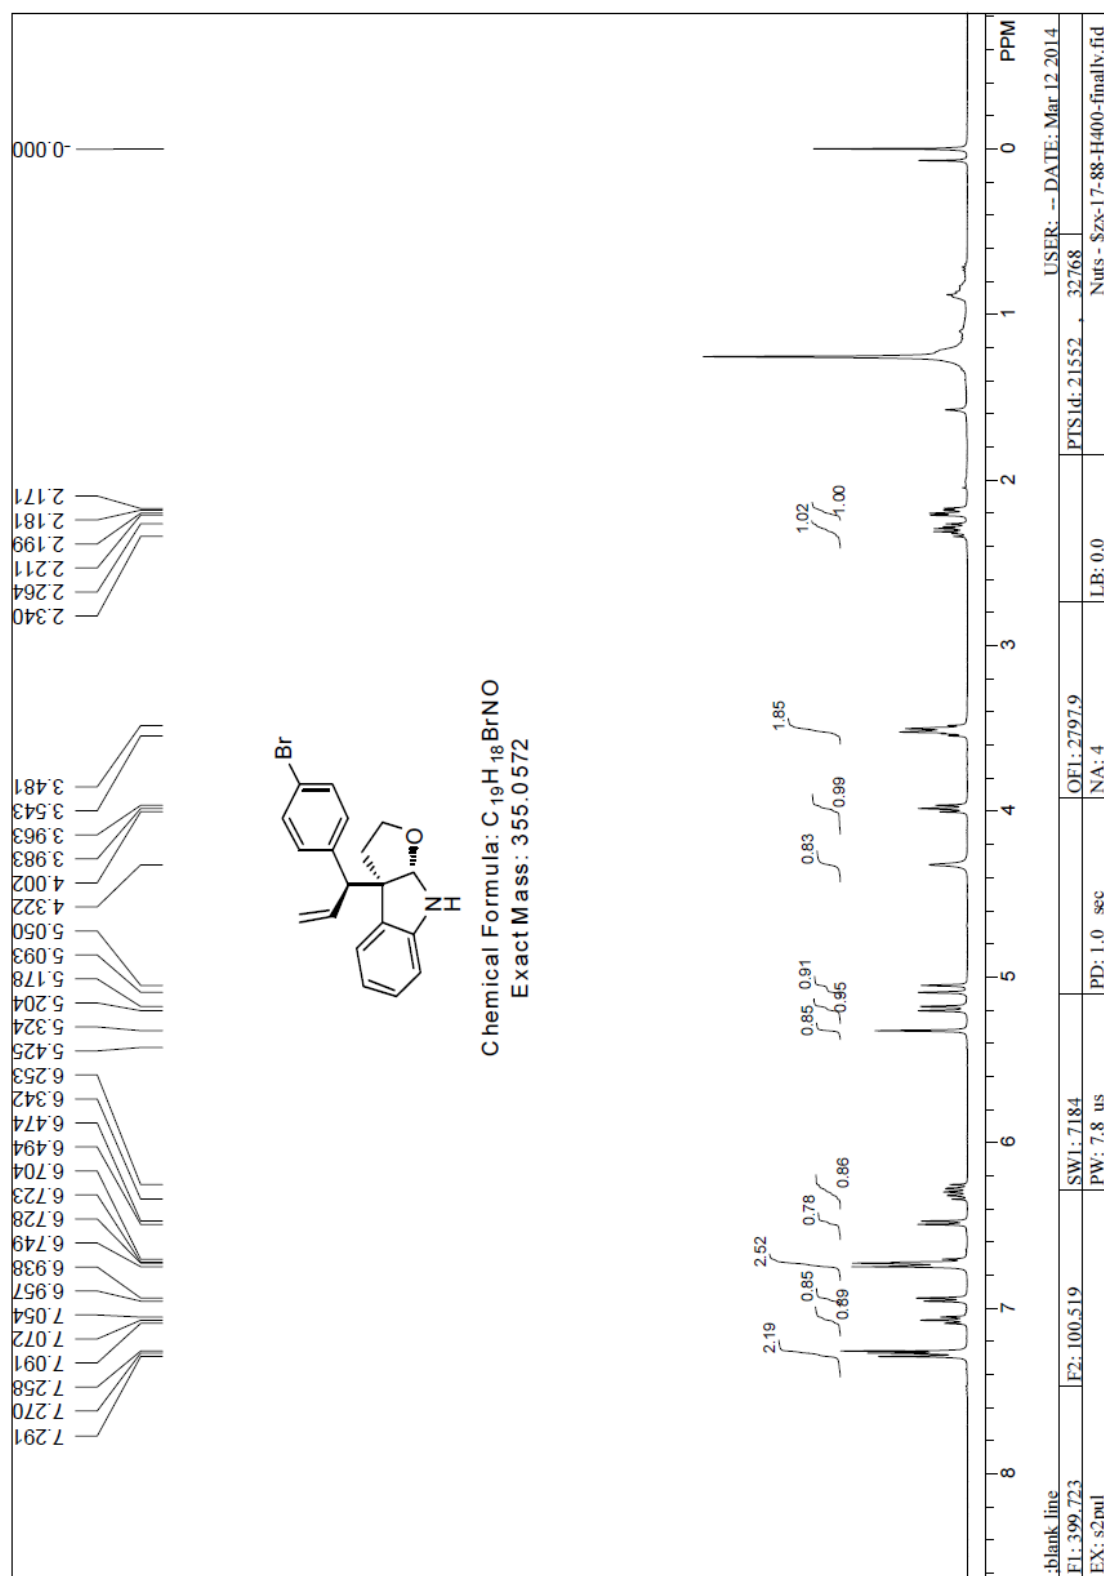

Compound **4af**'s  $^{13}\text{C}$  NMR Spectra

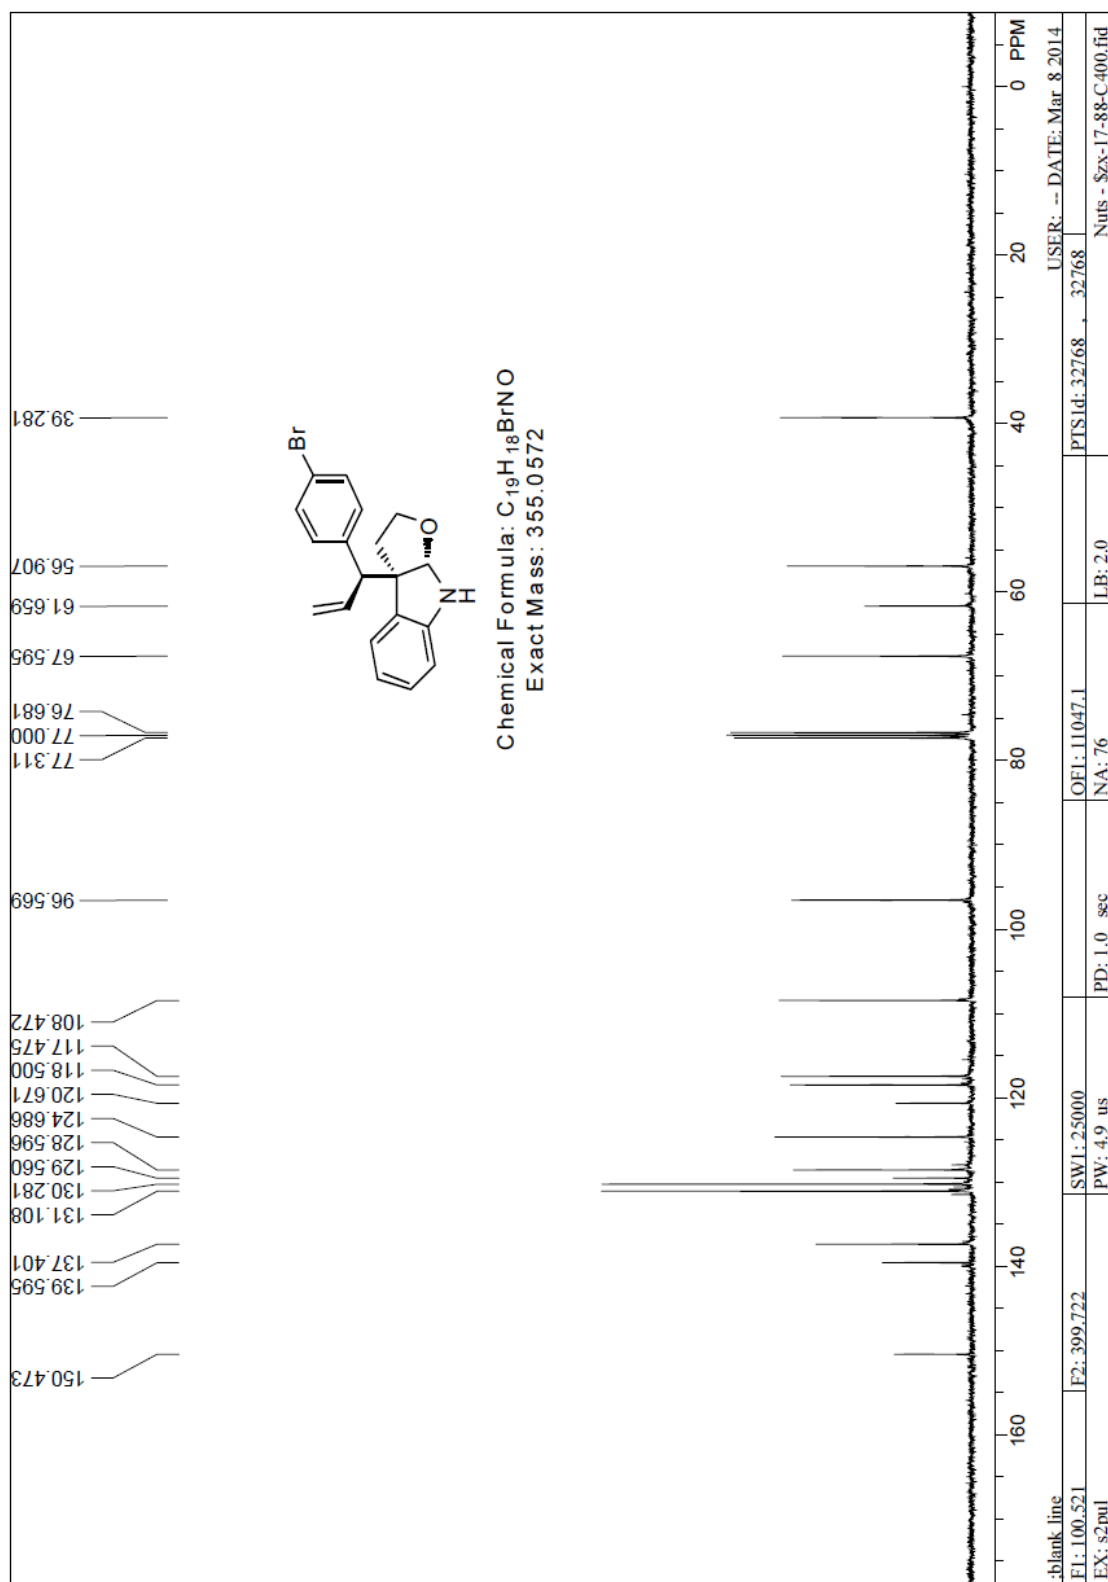

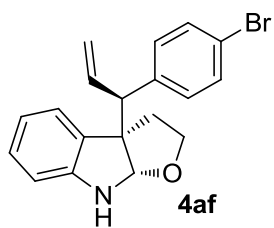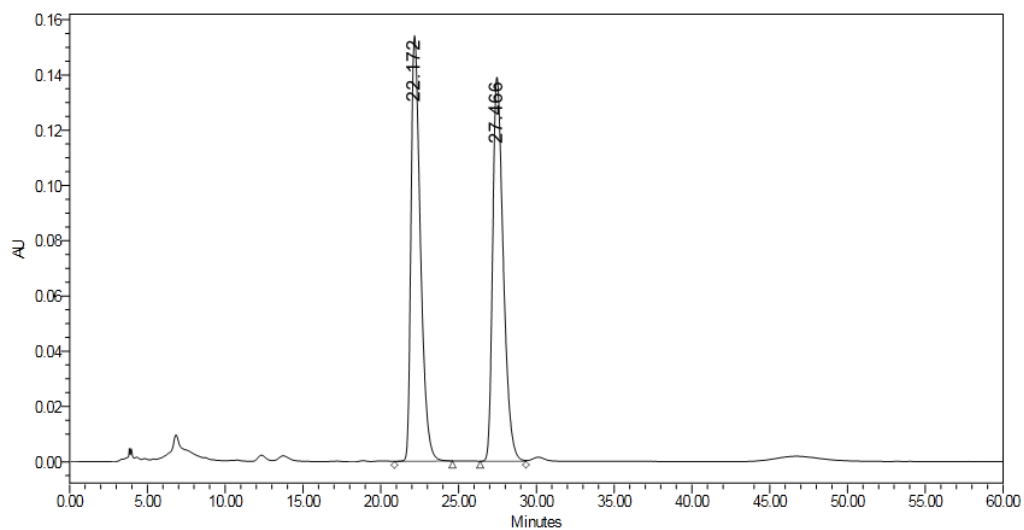

|   | RT<br>(min) | Area<br>(μV*sec) | % Area | Height<br>(μV) | %<br>Height |
|---|-------------|------------------|--------|----------------|-------------|
| 1 | 22.172      | 6505753          | 49.67  | 154117         | 52.58       |
| 2 | 27.466      | 6592312          | 50.33  | 138975         | 47.42       |

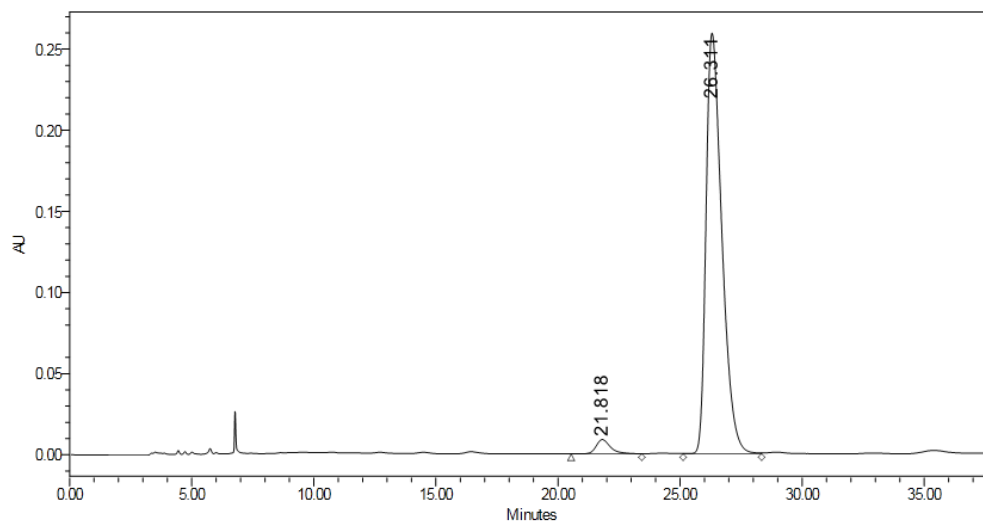

|   | RT<br>(min) | Area<br>(μV*sec) | % Area | Height<br>(μV) | %<br>Height |
|---|-------------|------------------|--------|----------------|-------------|
| 1 | 21.818      | 358175           | 2.98   | 8786           | 3.28        |
| 2 | 26.311      | 11676422         | 97.02  | 259202         | 96.72       |

Compound **4ag**'s  $^1\text{H}$  NMR Spectra

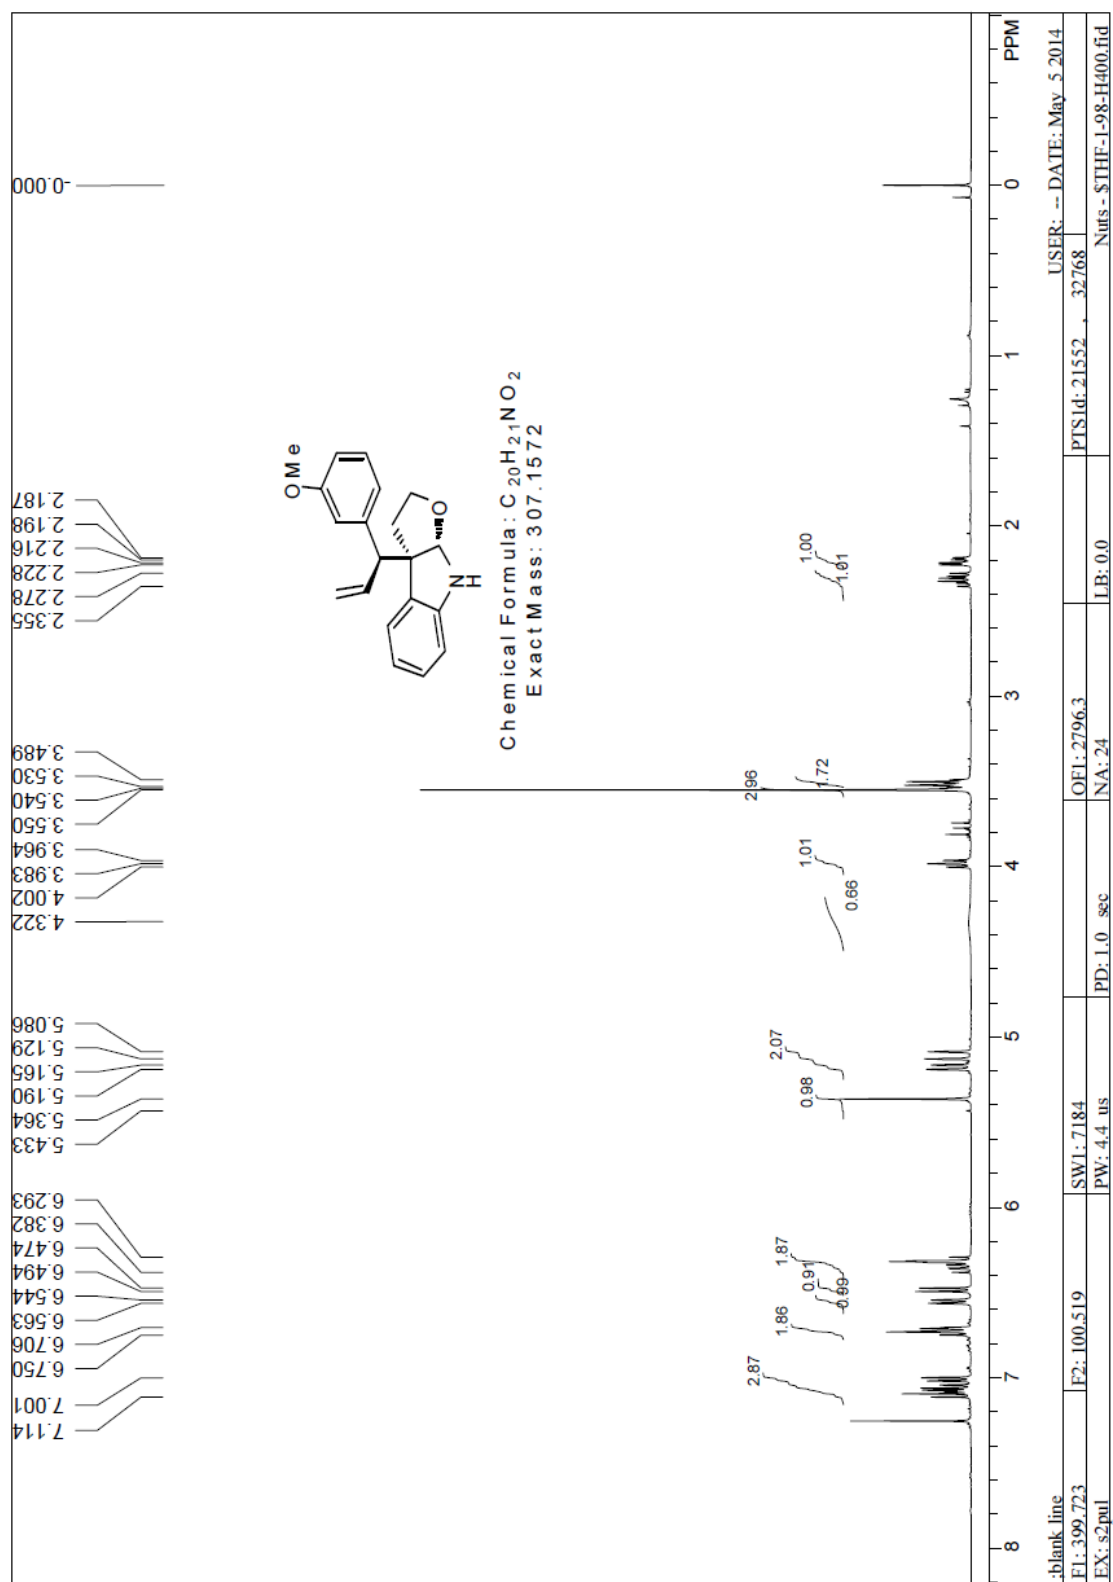

Compound **4ag**'s  $^{13}\text{C}$  NMR Spectra

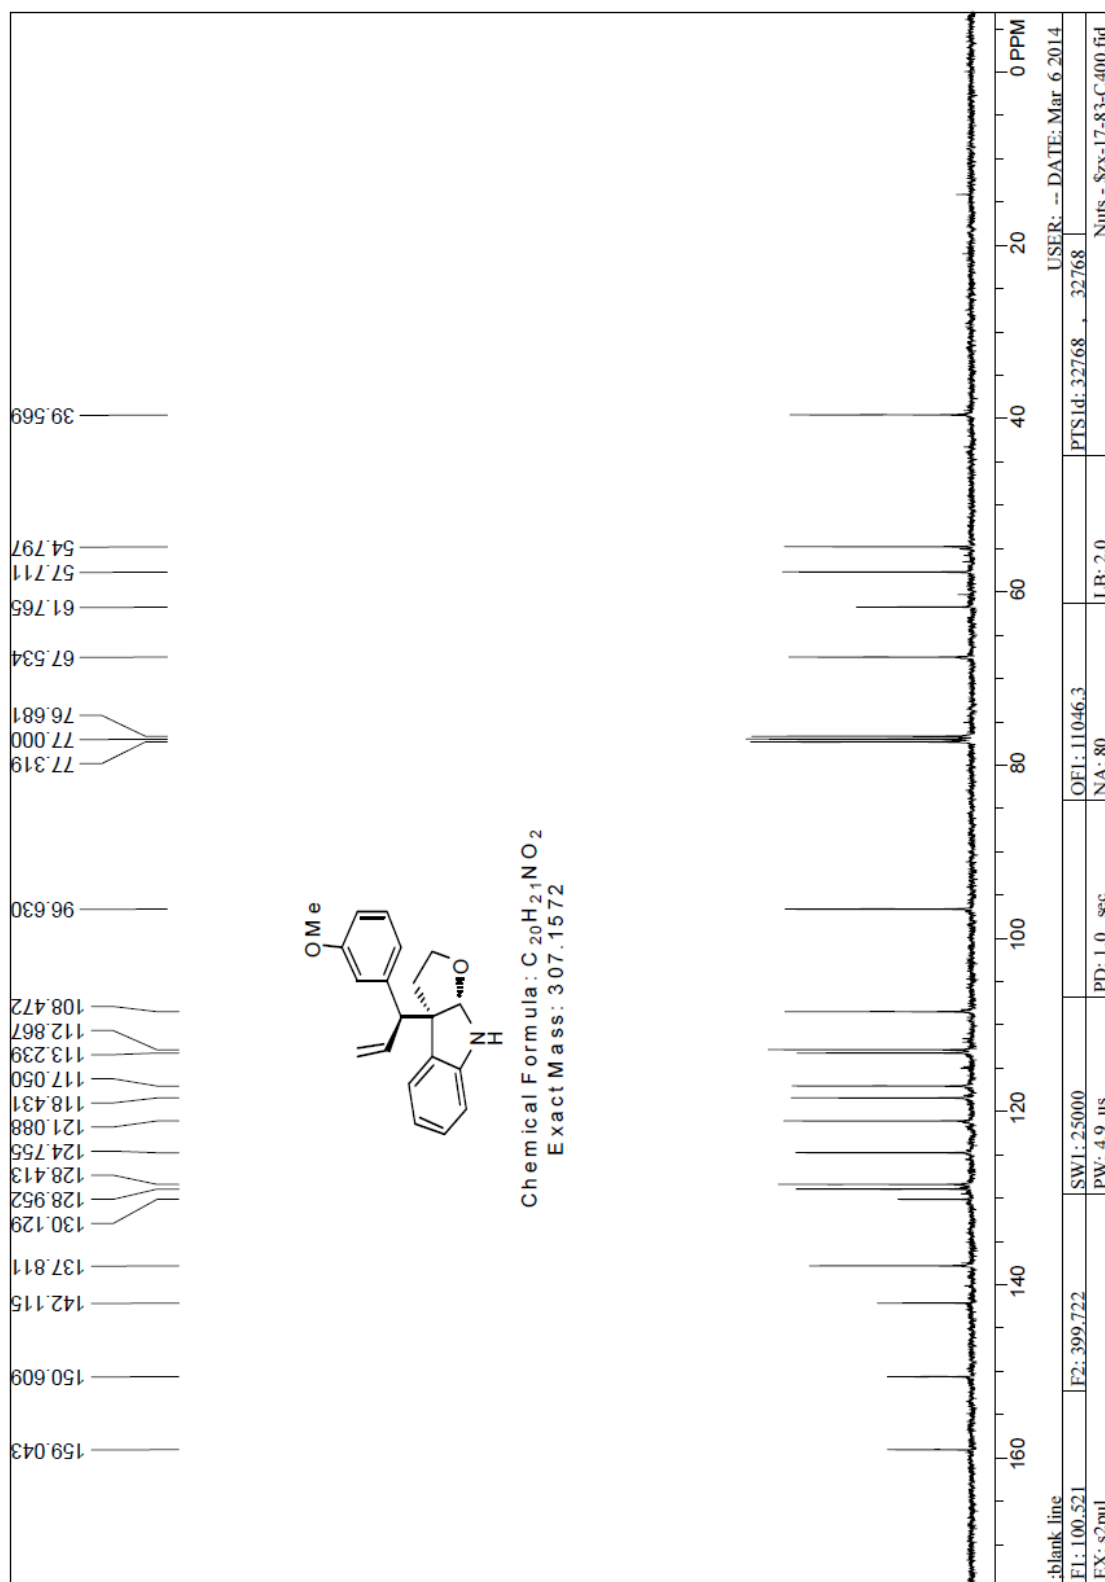

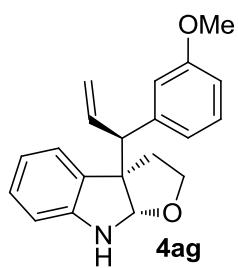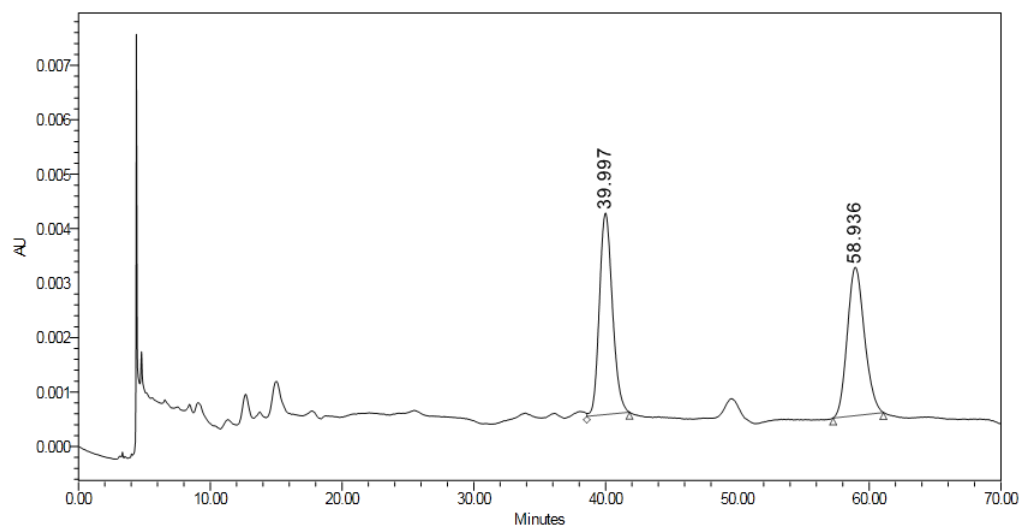

|   | RT<br>(min) | Area<br>(μV*sec) | % Area | Height<br>(μV) | %<br>Height |
|---|-------------|------------------|--------|----------------|-------------|
| 1 | 39.997      | 254165           | 50.70  | 3699           | 57.59       |
| 2 | 58.936      | 247190           | 49.30  | 2724           | 42.41       |

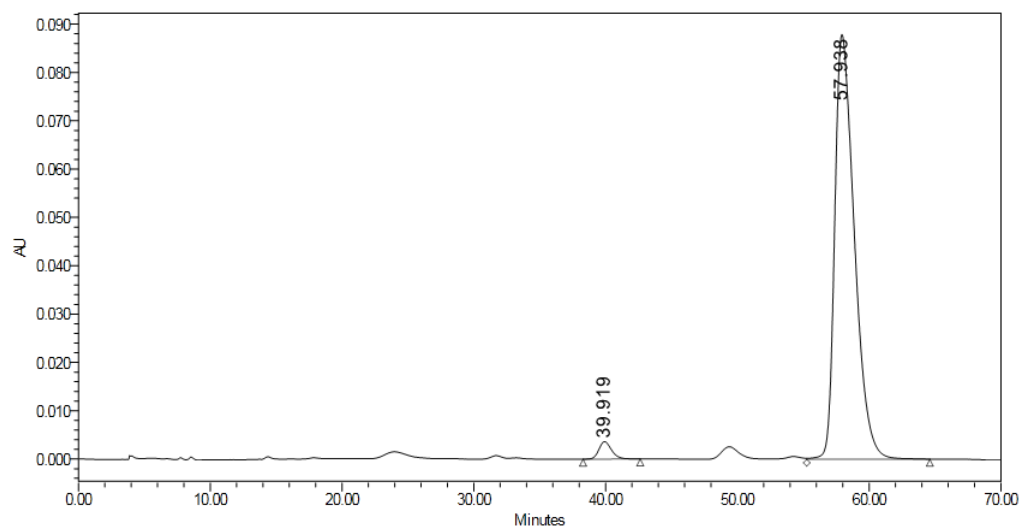

|   | RT<br>(min) | Area<br>(μV*sec) | % Area | Height<br>(μV) | %<br>Height |
|---|-------------|------------------|--------|----------------|-------------|
| 1 | 39.919      | 243165           | 2.61   | 3624           | 3.96        |
| 2 | 57.938      | 9072530          | 97.39  | 87899          | 96.04       |

Compound **4ah**'s  $^1\text{H}$  NMR Spectra

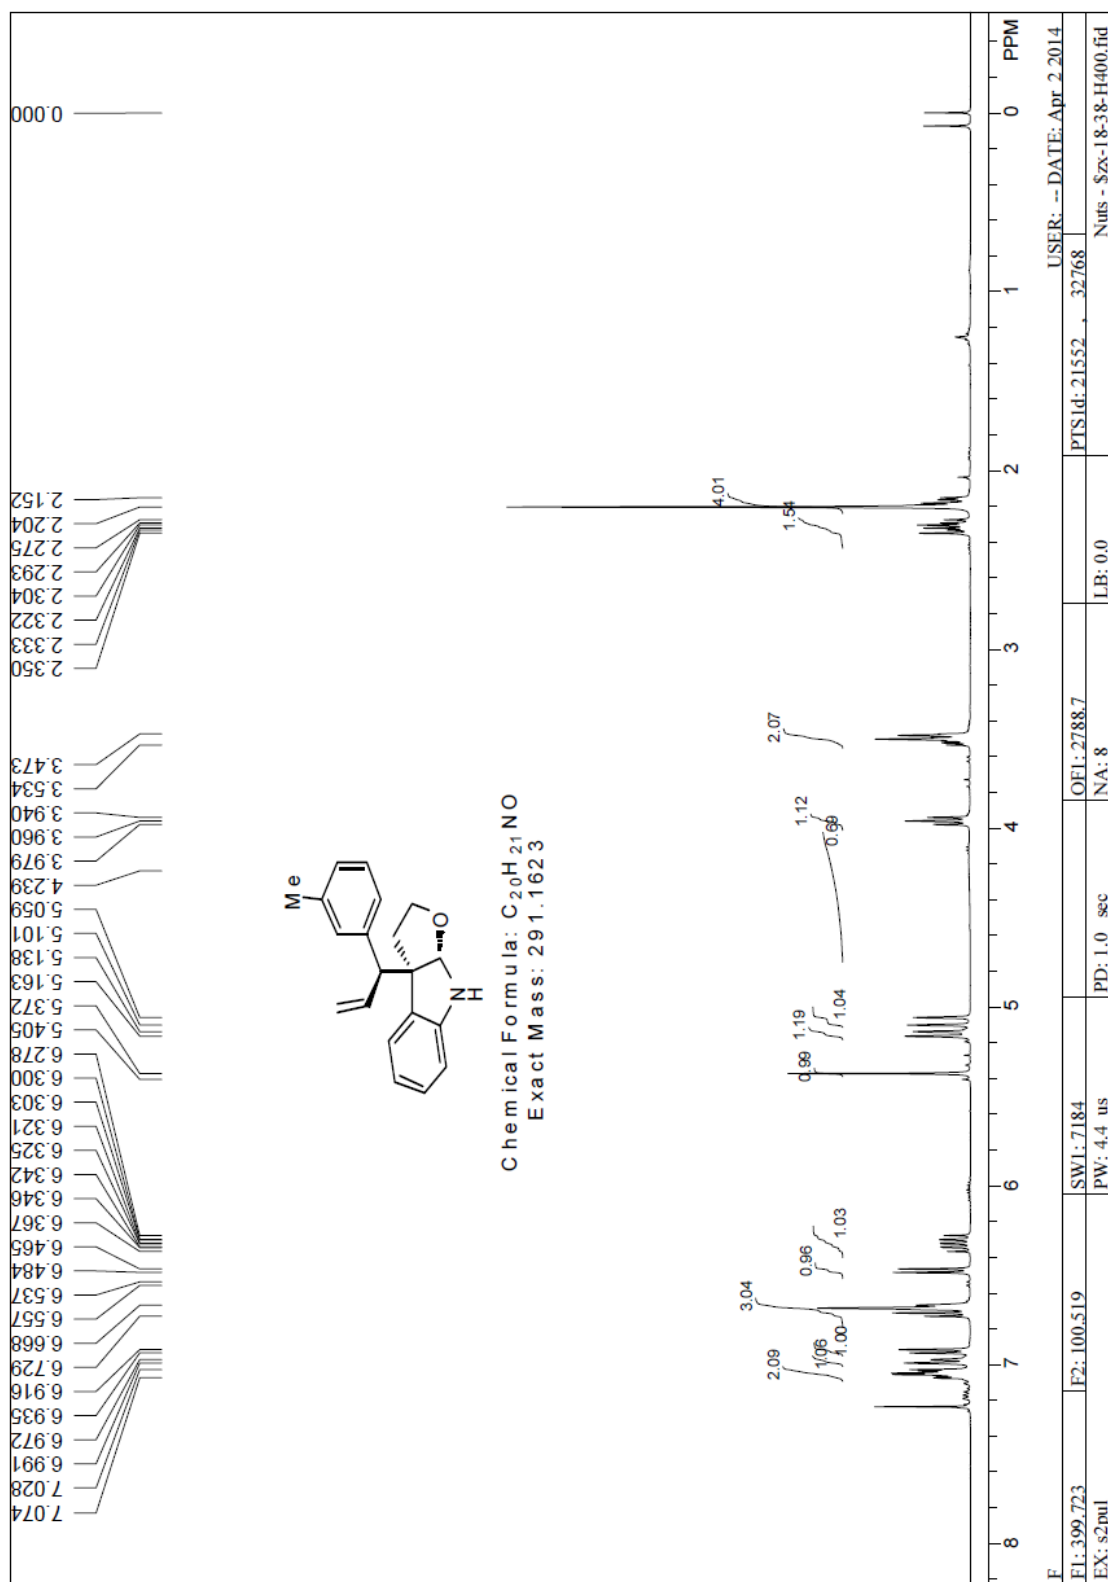

Compound **4ah**'s  $^{13}\text{C}$  NMR Spectra

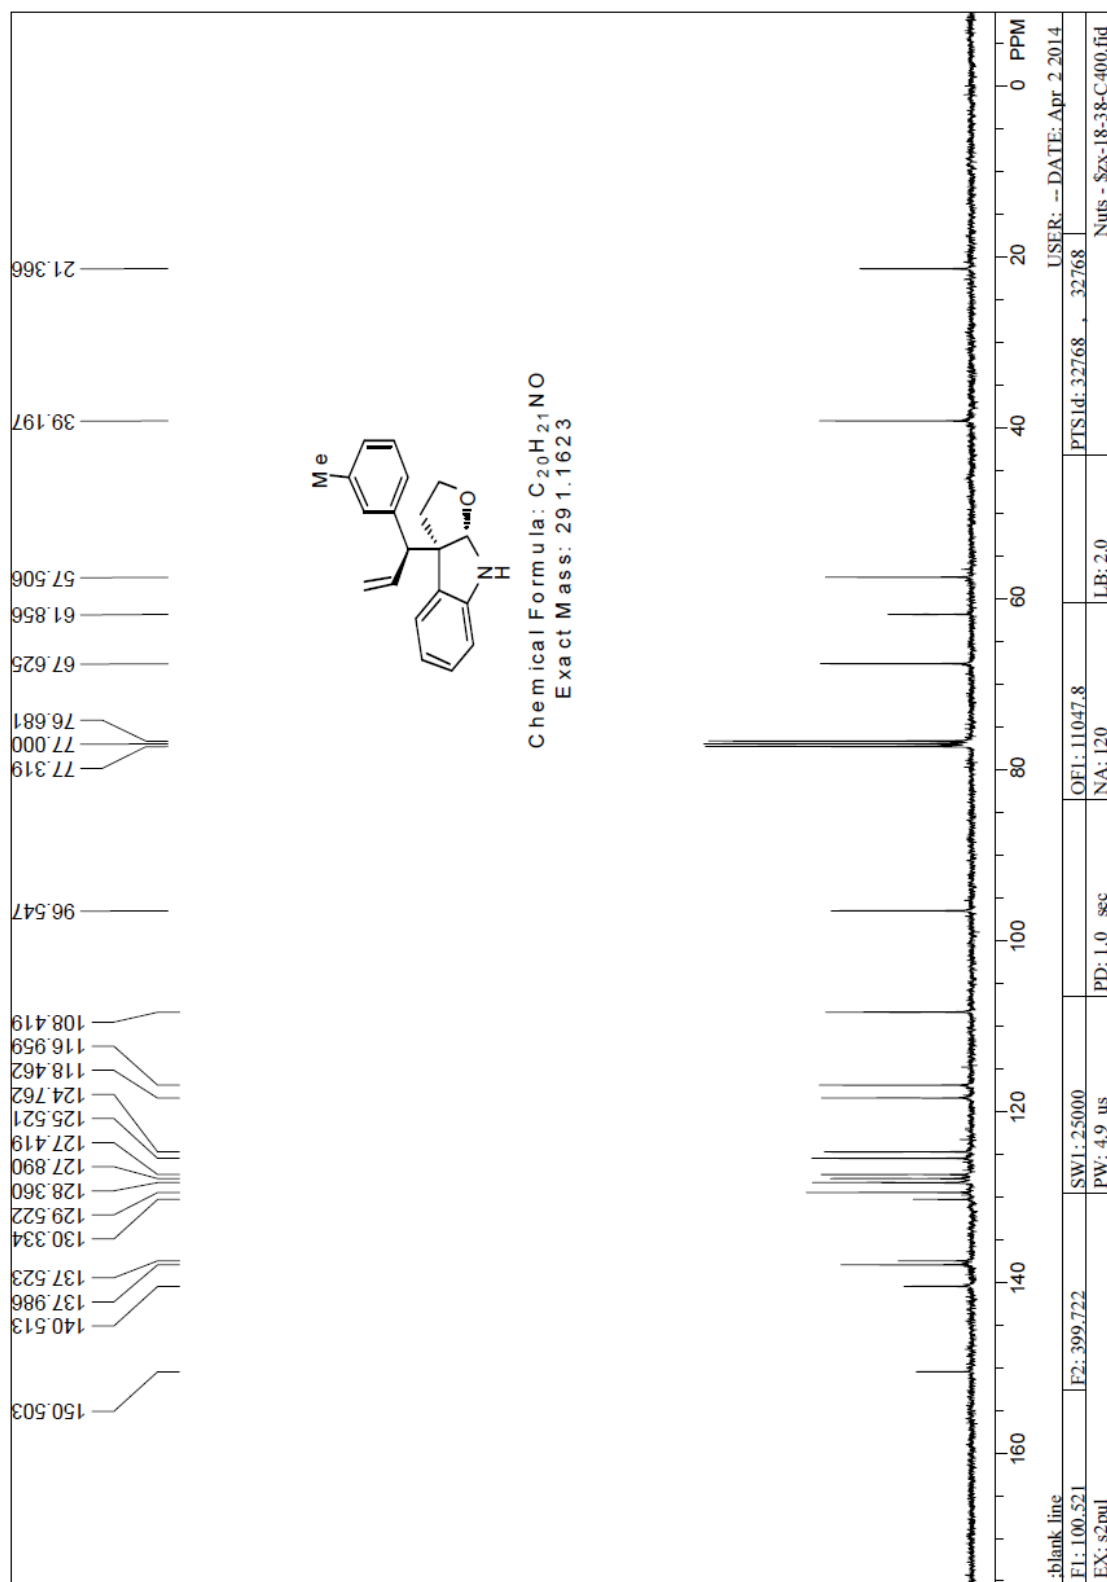



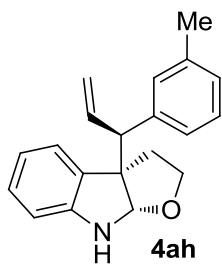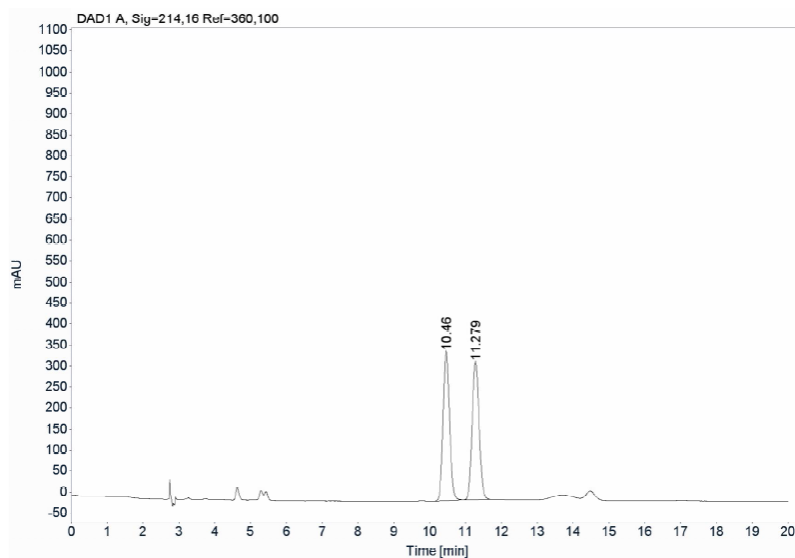

Signal: DAD1 A, Sig=214, 16 Ref=360,100

| RT [min] | Type | Width [min] | Area      | Height   | Area%   |
|----------|------|-------------|-----------|----------|---------|
| 10.460   | BB   | 0.1989      | 4502.0894 | 355.2287 | 50.1594 |
| 11.279   | BB   | 0.2142      | 4473.4771 | 327.7354 | 49.8406 |
|          |      | Sum         | 8975.5664 |          |         |

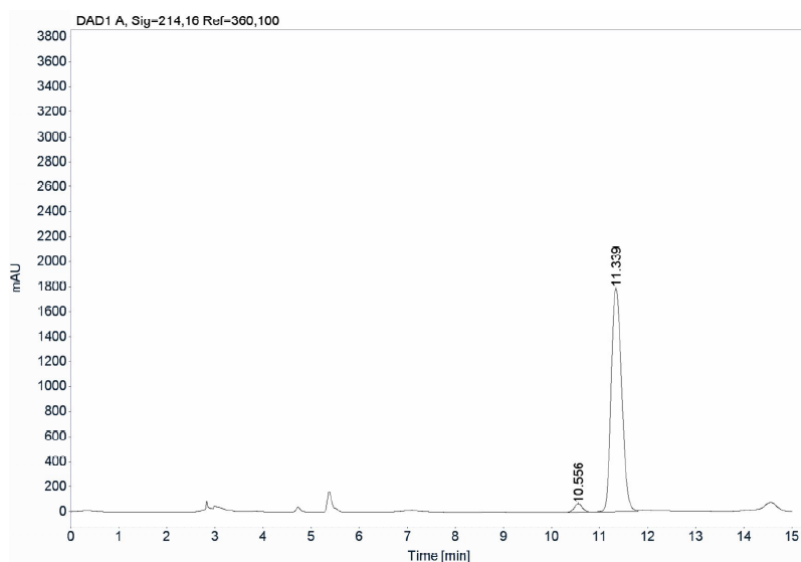

Signal: DAD1 A, Sig=214, 16 Ref=360,100

| RT [min] | Type | Width [min] | Area       | Height    | Area%   |
|----------|------|-------------|------------|-----------|---------|
| 10.556   | BB   | 0.1928      | 808.2638   | 66.0229   | 2.8743  |
| 11.339   | BV   | 0.2422      | 27312.2109 | 1788.2399 | 97.1257 |
|          |      | Sum         | 28120.4747 |           |         |

Compound **4ai**'s  $^1\text{H}$  NMR Spectra

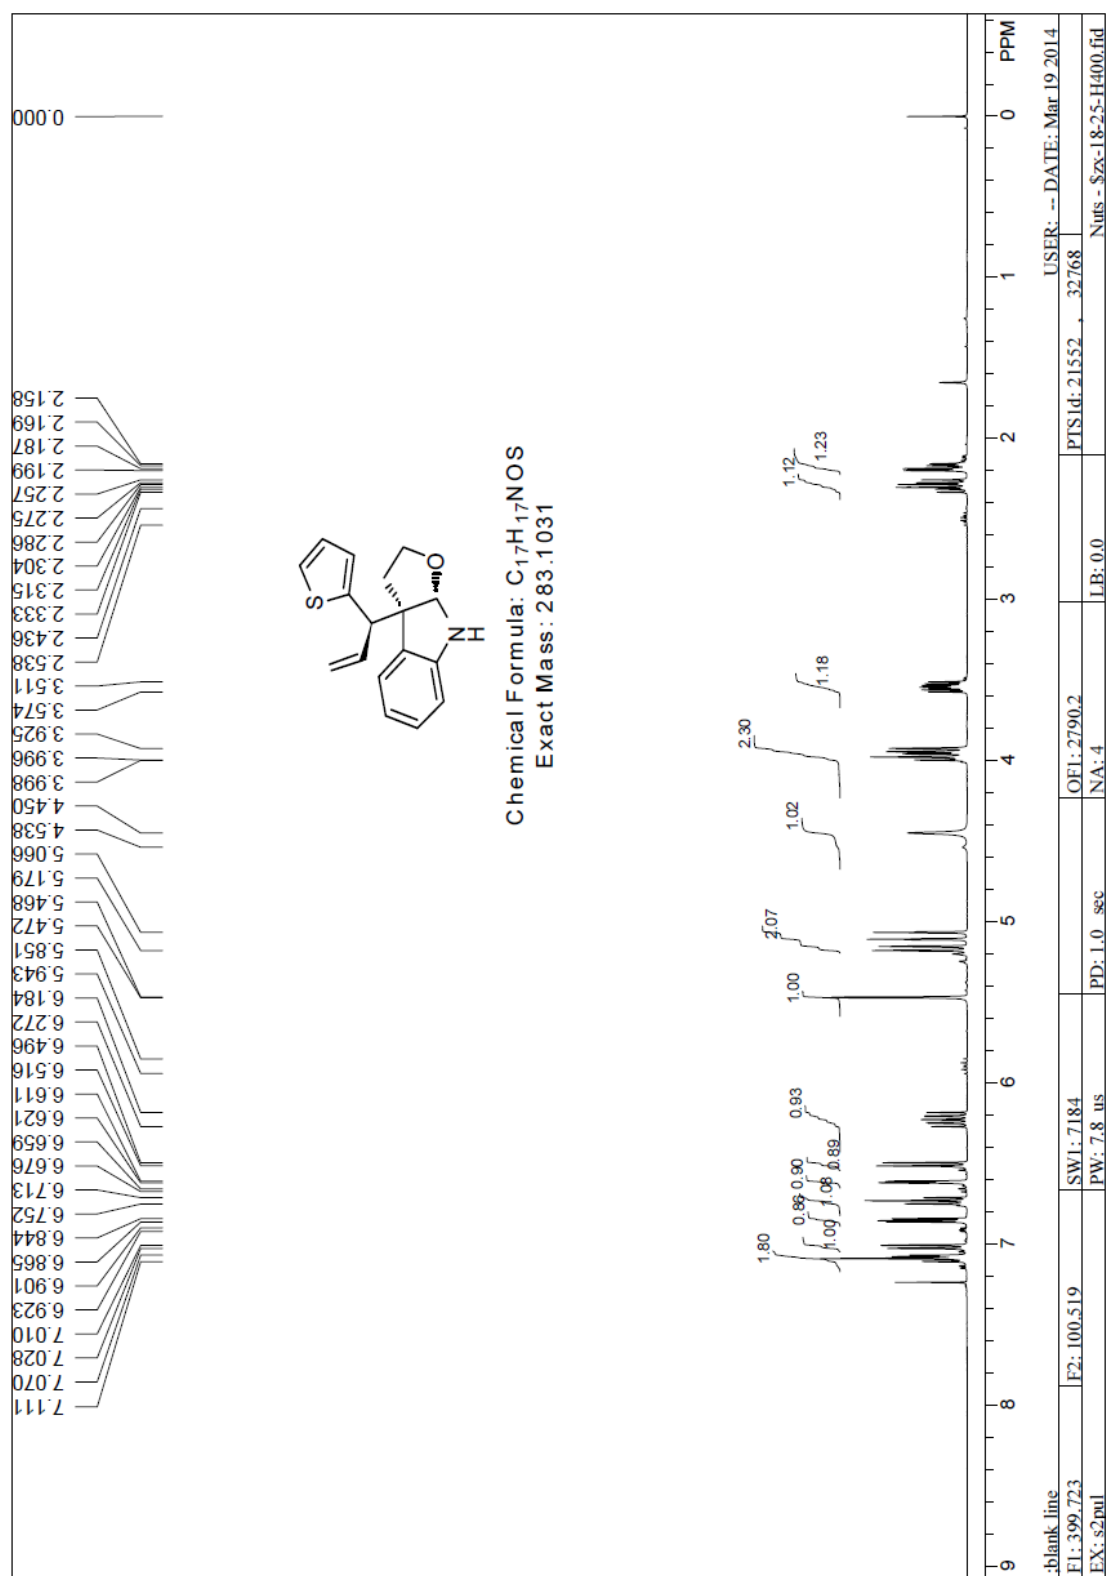

Compound **4ai**'s  $^{13}\text{C}$  NMR Spectra

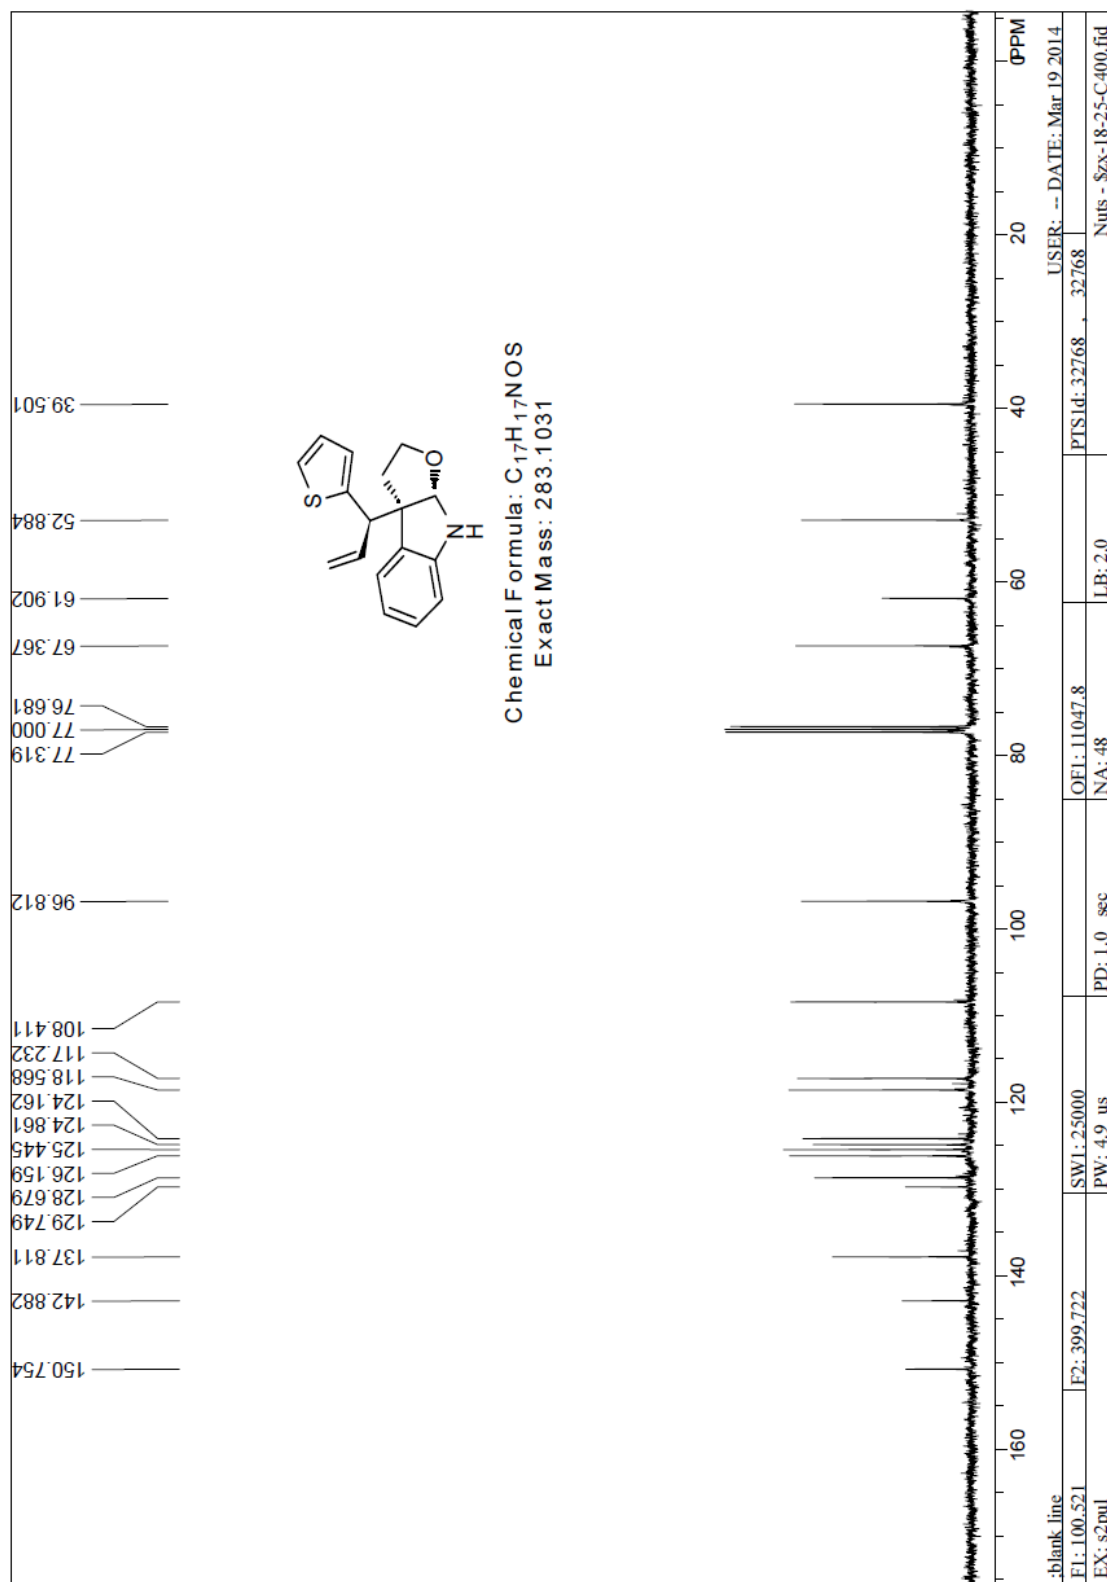

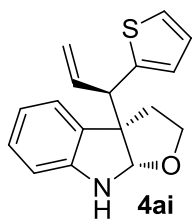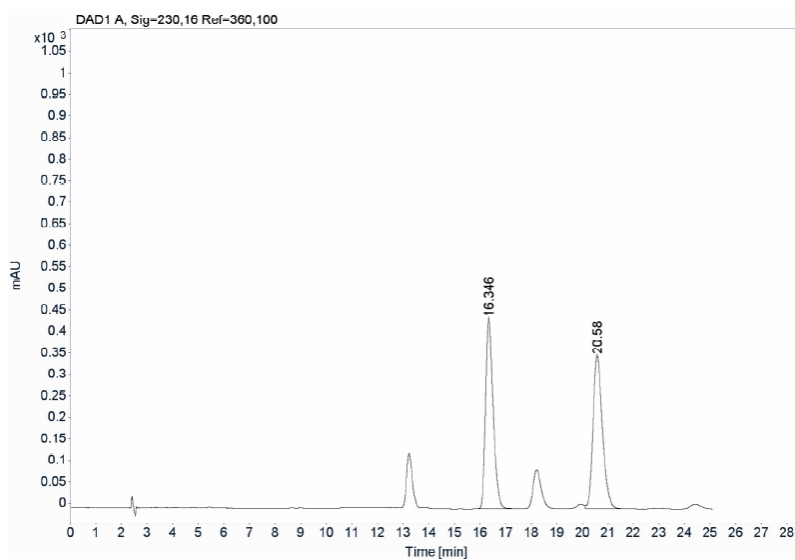

Signal: DAD1 A, Sig=230,16 Ref=360,100

| RT [min] | Type | Width [min] | Area       | Height   | Area%   |
|----------|------|-------------|------------|----------|---------|
| 16.346   | BB   | 0.3143      | 9079.8027  | 442.7292 | 49.8705 |
| 20.580   | VB   | 0.3899      | 9126.9639  | 356.2337 | 50.1295 |
|          |      | Sum         | 18206.7666 |          |         |

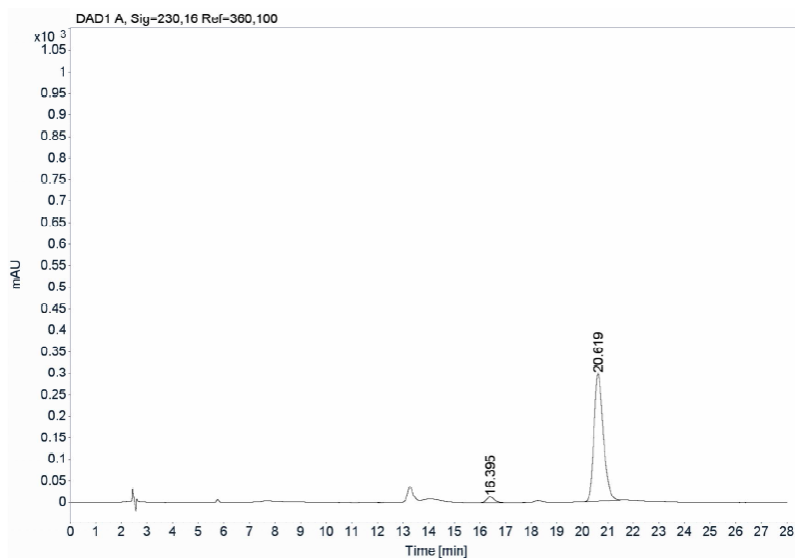

Signal: DAD1 A, Sig=230,16 Ref=360,100

| RT [min] | Type | Width [min] | Area      | Height   | Area%   |
|----------|------|-------------|-----------|----------|---------|
| 16.395   | BB   | 0.2602      | 263.4116  | 13.2341  | 3.3652  |
| 20.619   | BB   | 0.3922      | 7563.9995 | 296.9719 | 96.6348 |
|          |      | Sum         | 7827.4111 |          |         |

Compound **4aj**'s  $^1\text{H}$  NMR Spectra

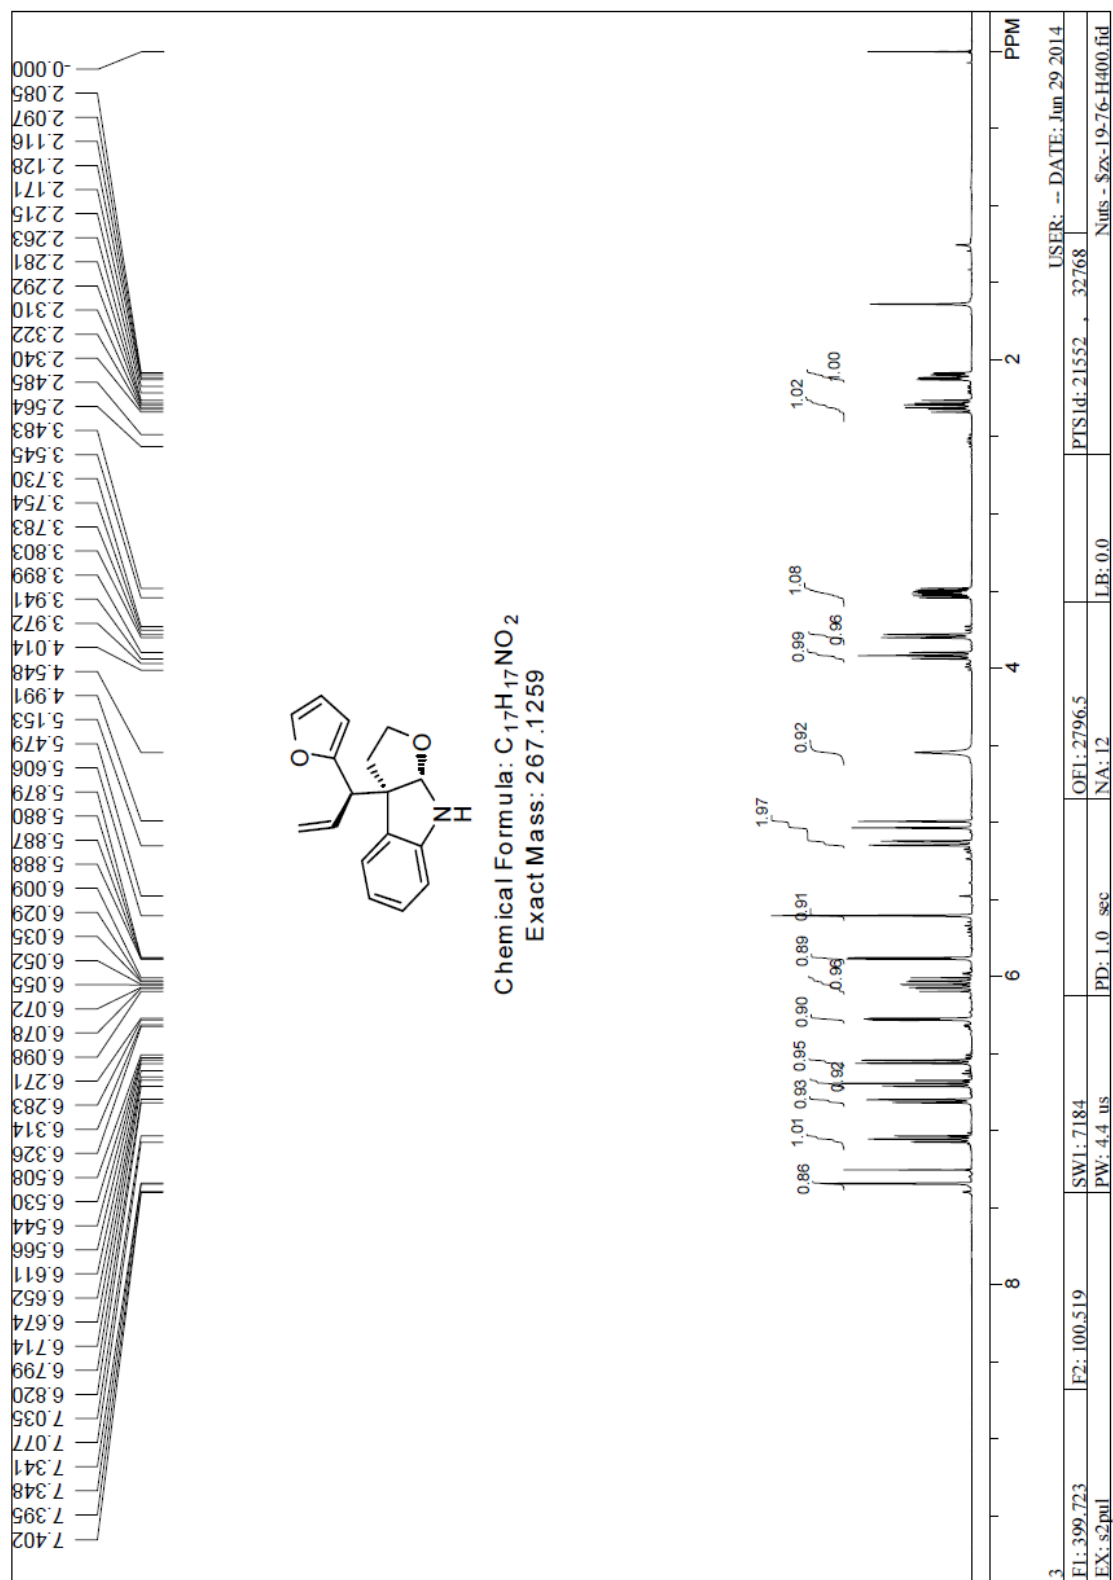

Compound **4aj**'s  $^{13}\text{C}$  NMR Spectra

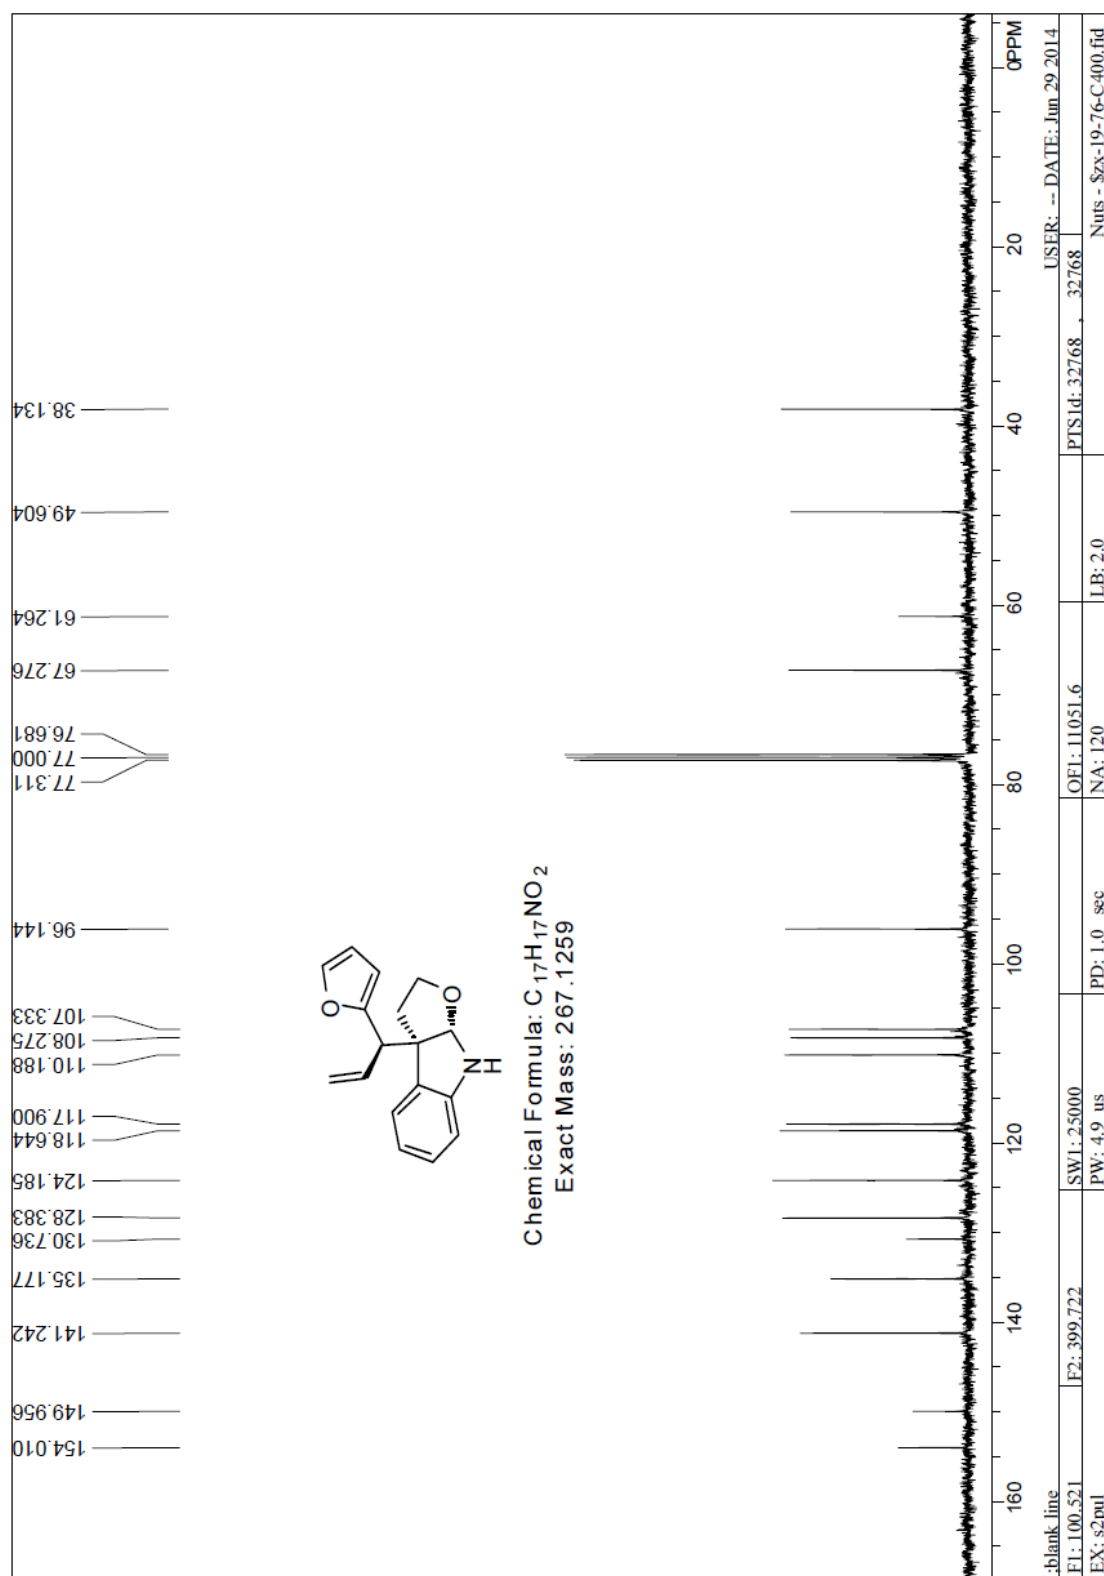

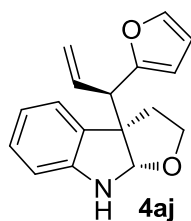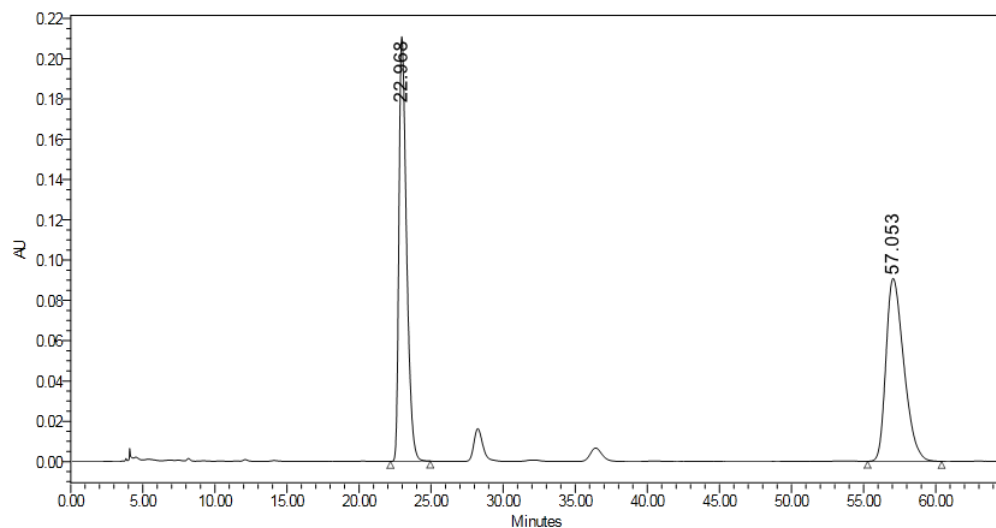

|   | RT<br>(min) | Area<br>(μV*sec) | % Area | Height<br>(μV) | %<br>Height |
|---|-------------|------------------|--------|----------------|-------------|
| 1 | 22.968      | 7750585          | 49.73  | 210893         | 69.89       |
| 2 | 57.053      | 7833332          | 50.27  | 90849          | 30.11       |

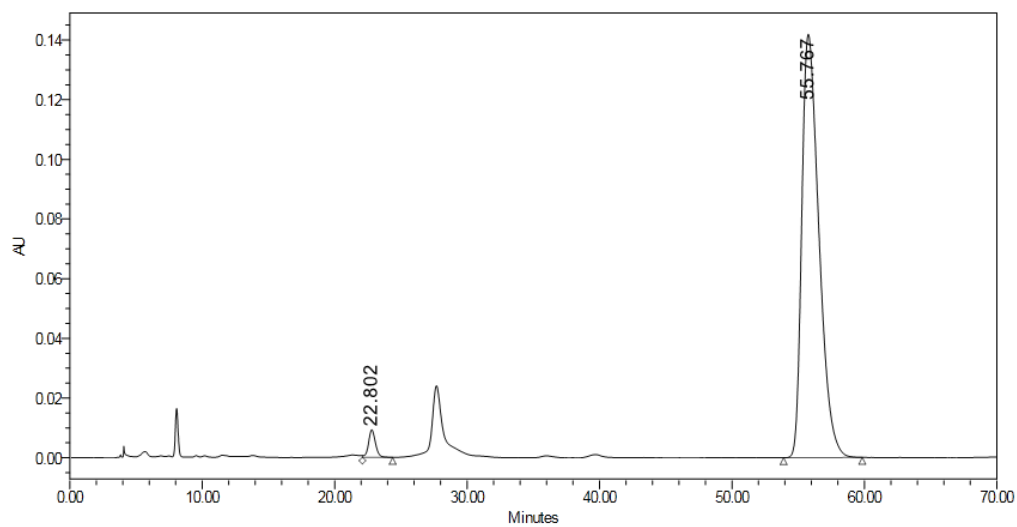

|   | RT<br>(min) | Area<br>(μV*sec) | % Area | Height<br>(μV) | %<br>Height |
|---|-------------|------------------|--------|----------------|-------------|
| 1 | 22.802      | 331890           | 2.54   | 9217           | 6.10        |
| 2 | 55.767      | 12734040         | 97.46  | 141930         | 93.90       |

Compound **4ak**'s  $^1\text{H}$  NMR Spectra

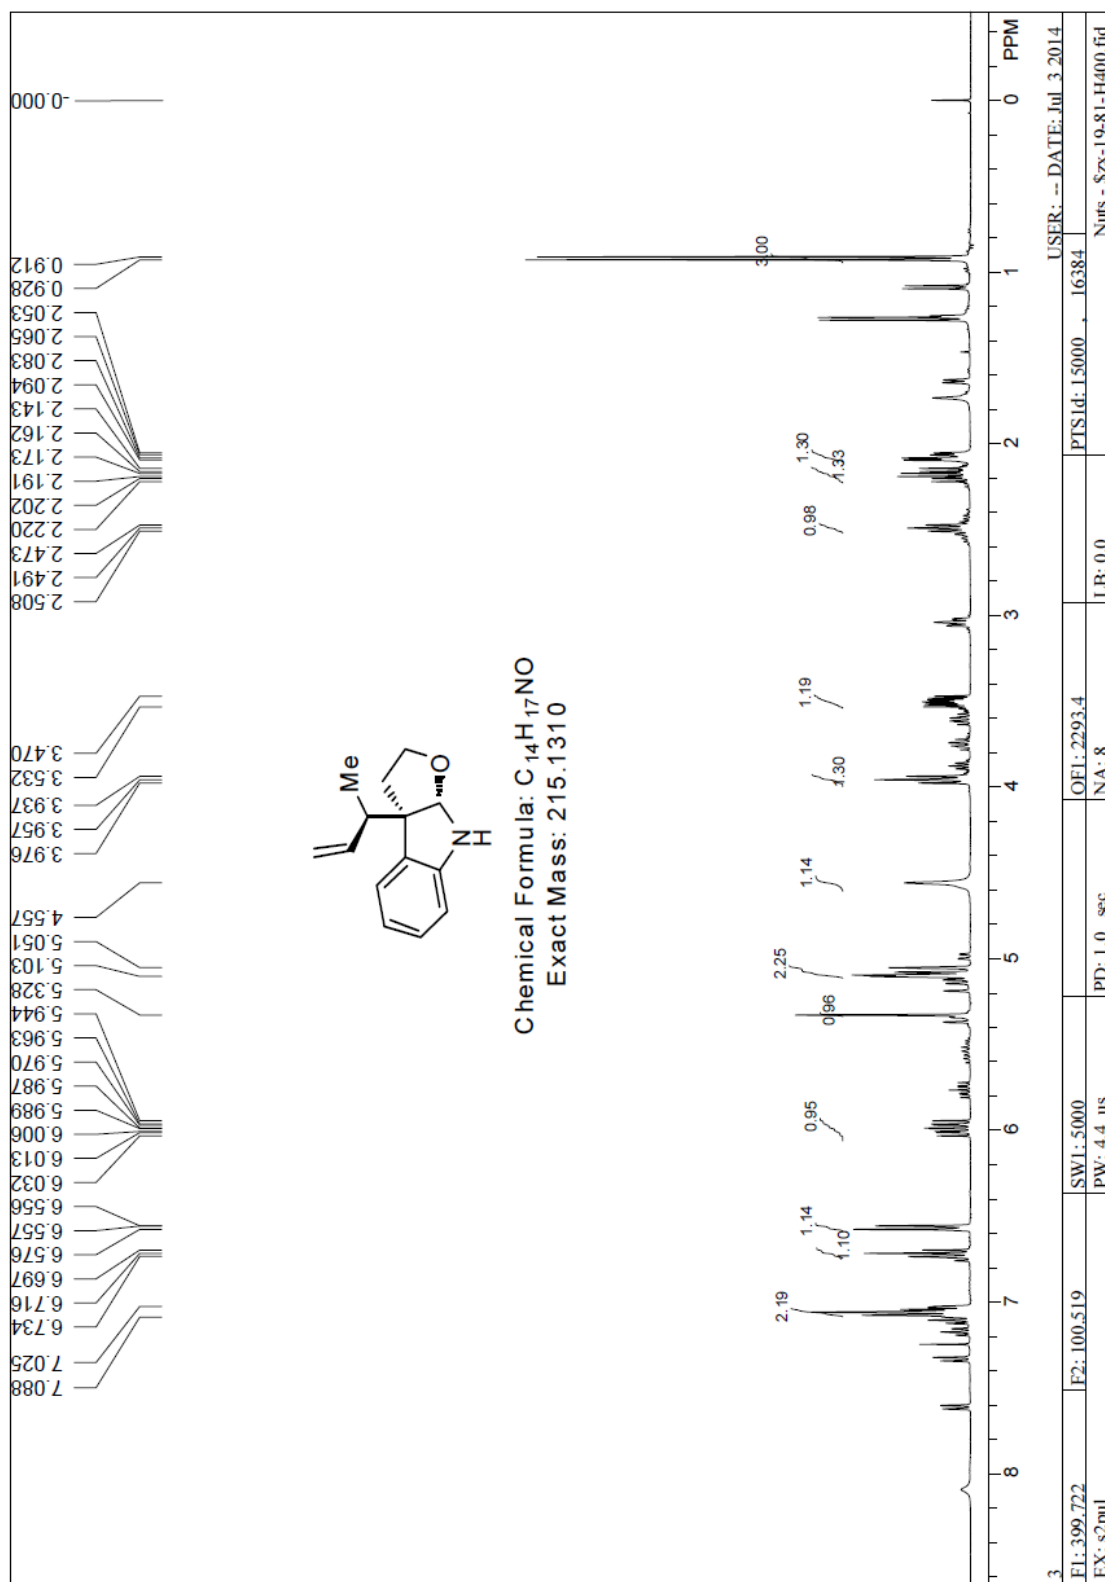



Compound **4ak**'s  $^{13}\text{C}$  NMR Spectra

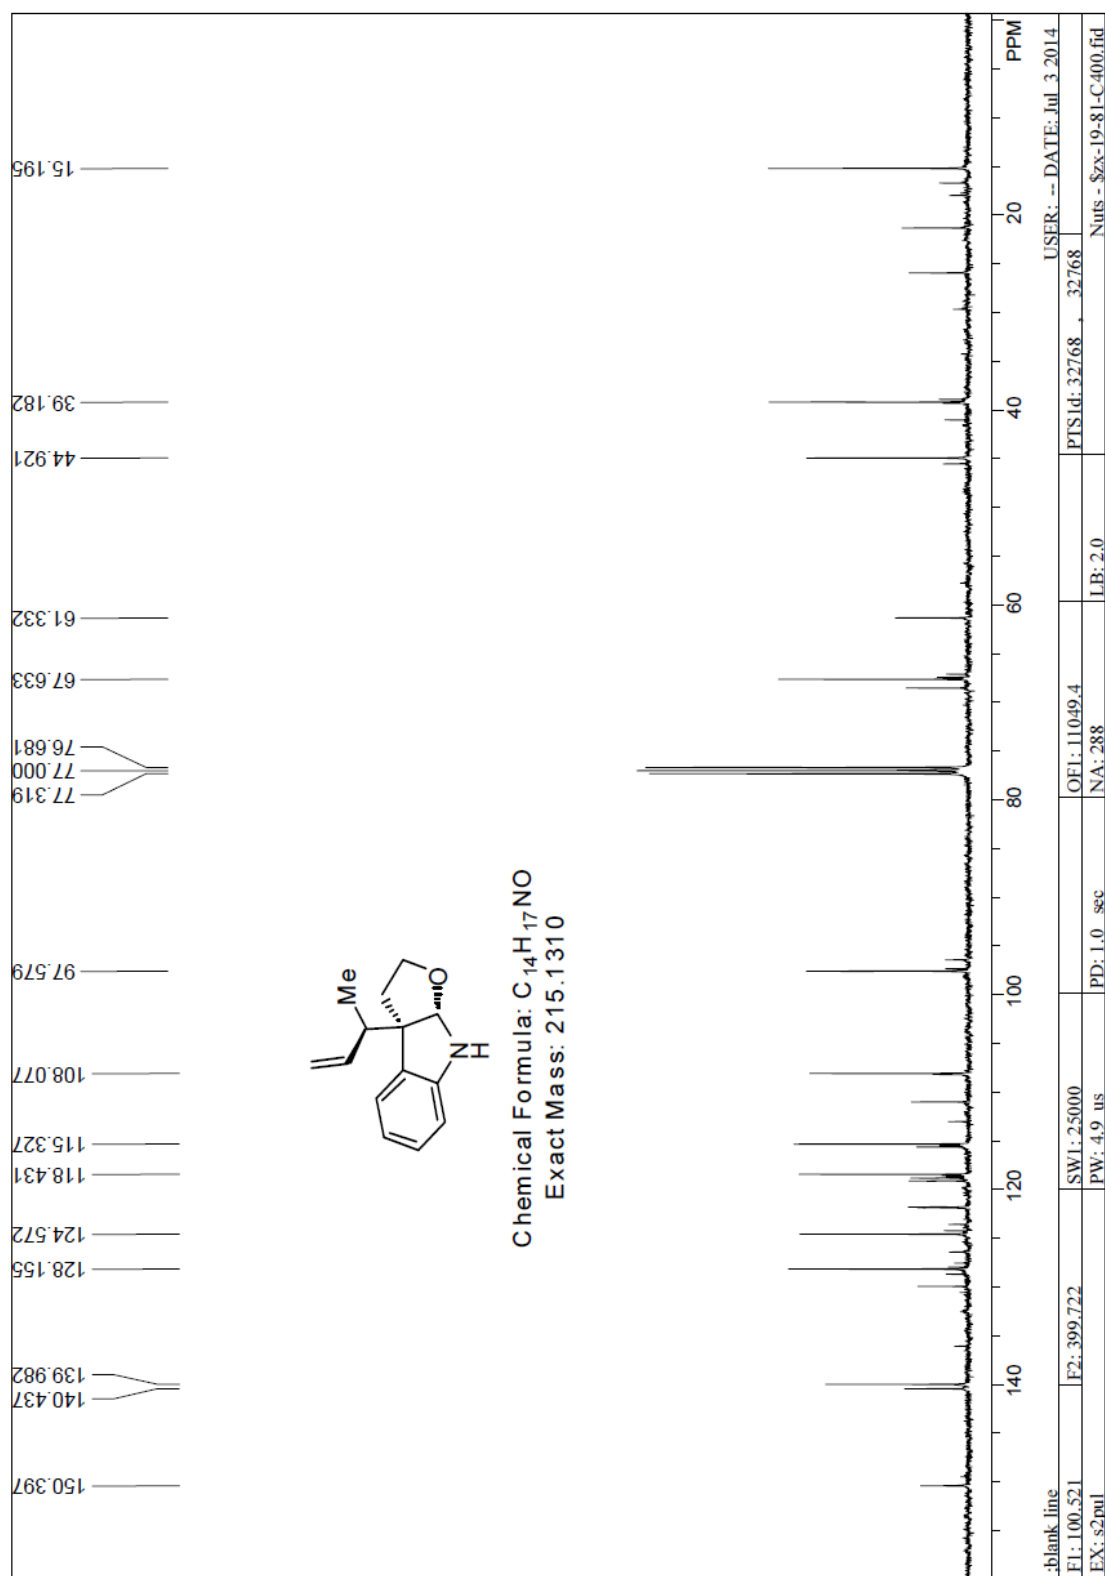

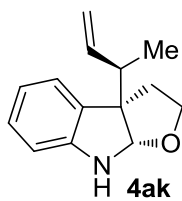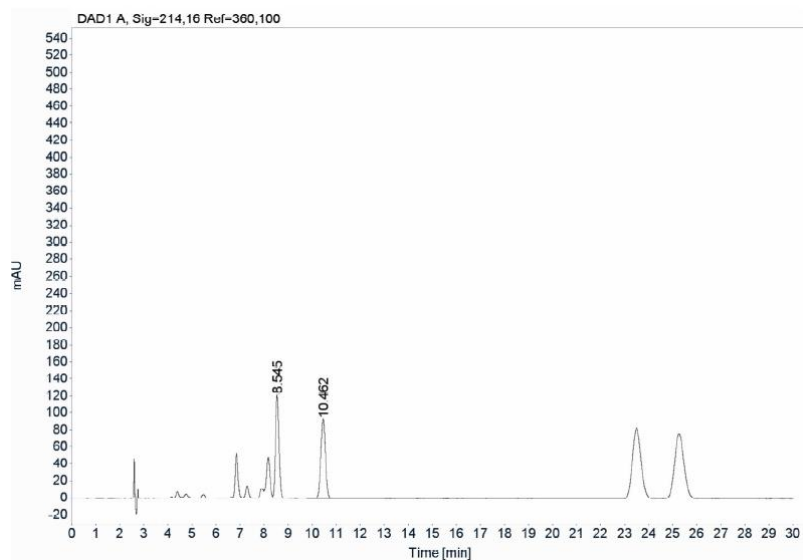

Signal: DAD1 A, Sig=214, 16 Ref=360, 100

| RT [min] | Type | Width [min] | Area      | Height   | Area%   |
|----------|------|-------------|-----------|----------|---------|
| 8.545    | VB   | 0.1532      | 1188.3176 | 120.3872 | 49.5048 |
| 10.462   | BB   | 0.2032      | 1212.0892 | 92.3072  | 50.4952 |
|          |      | Sum         | 2400.4069 |          |         |

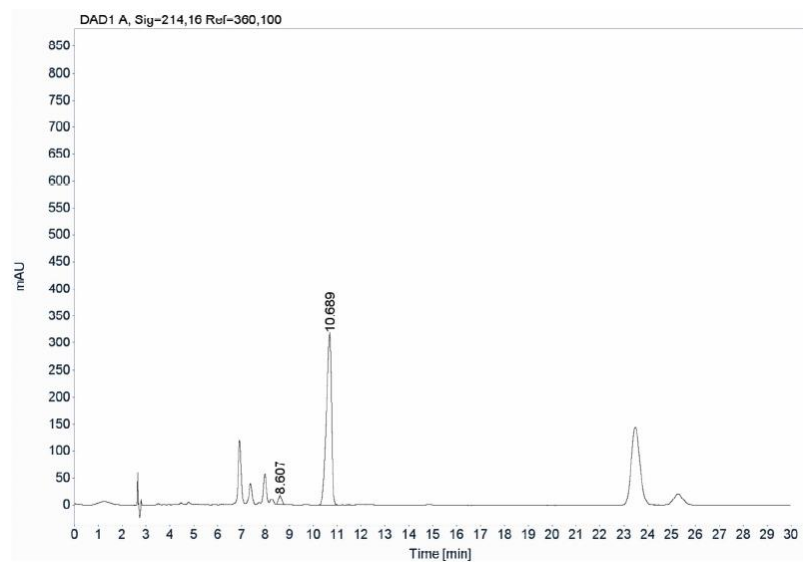

Signal: DAD1 A, Sig=214, 16 Ref=360, 100

| RT [min] | Type | Width [min] | Area      | Height   | Area%   |
|----------|------|-------------|-----------|----------|---------|
| 8.607    | BB   | 0.1432      | 159.0965  | 16.9912  | 3.2793  |
| 10.689   | BB   | 0.2222      | 4692.3721 | 316.1453 | 96.7207 |
|          |      | Sum         | 4851.4686 |          |         |

Compound **4ba**'s  $^1\text{H}$  NMR Spectra

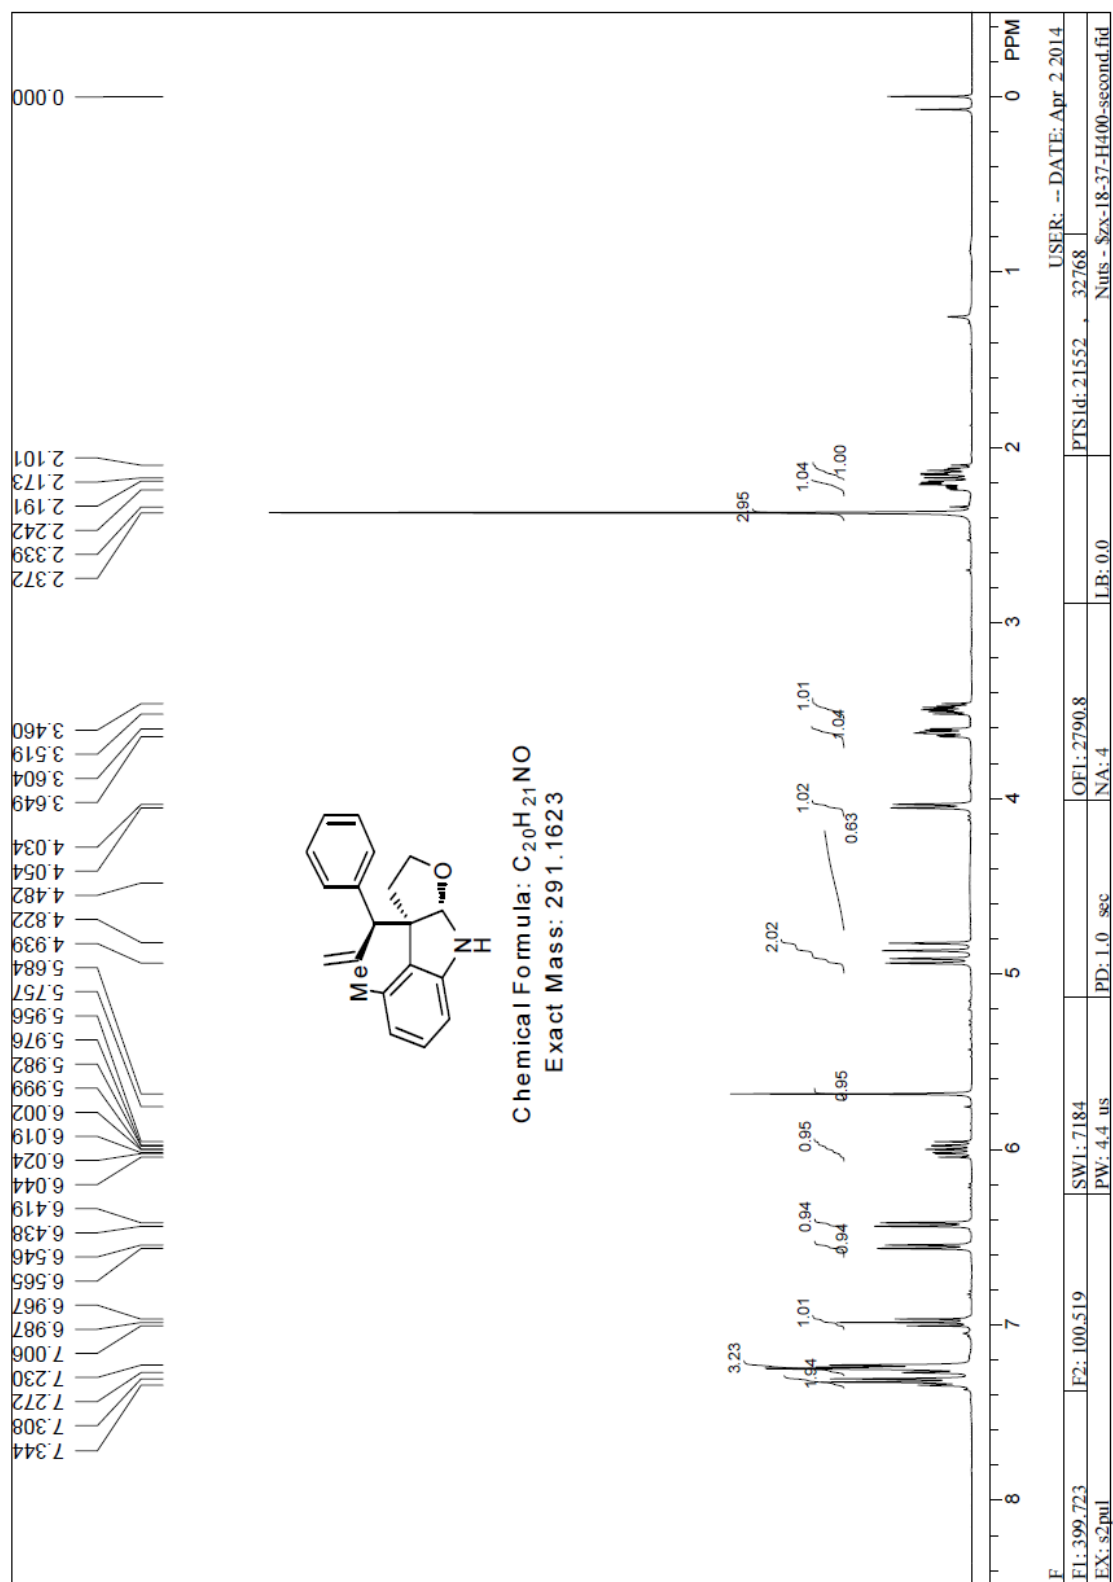

Compound **4ba**'s  $^{13}\text{C}$  NMR Spectra

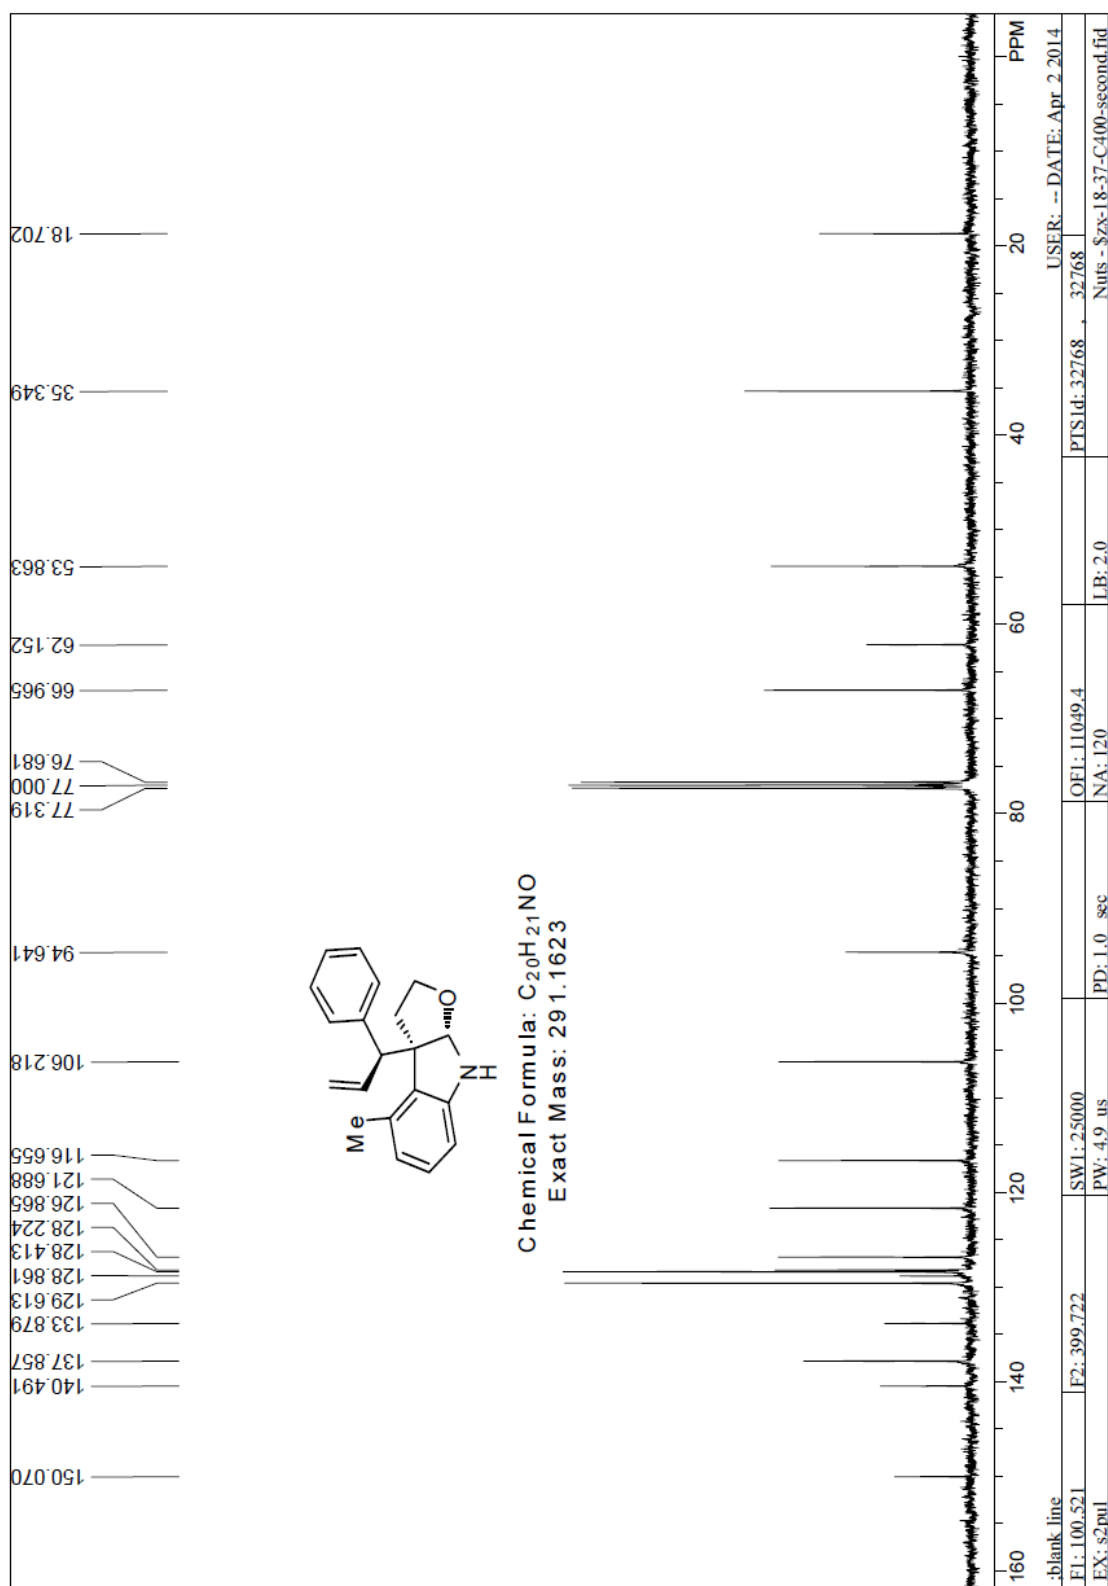

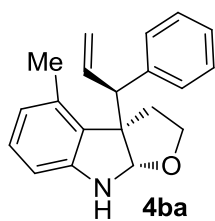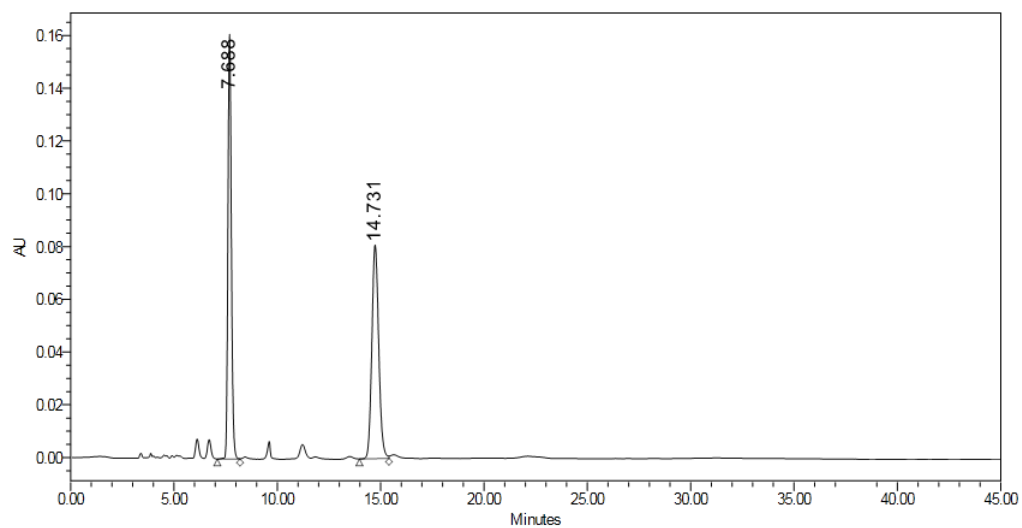

|   | RT<br>(min) | Area<br>(μV*sec) | % Area | Height<br>(μV) | %<br>Height |
|---|-------------|------------------|--------|----------------|-------------|
| 1 | 7.688       | 1842495          | 49.74  | 161040         | 66.53       |
| 2 | 14.731      | 1861528          | 50.26  | 81002          | 33.47       |

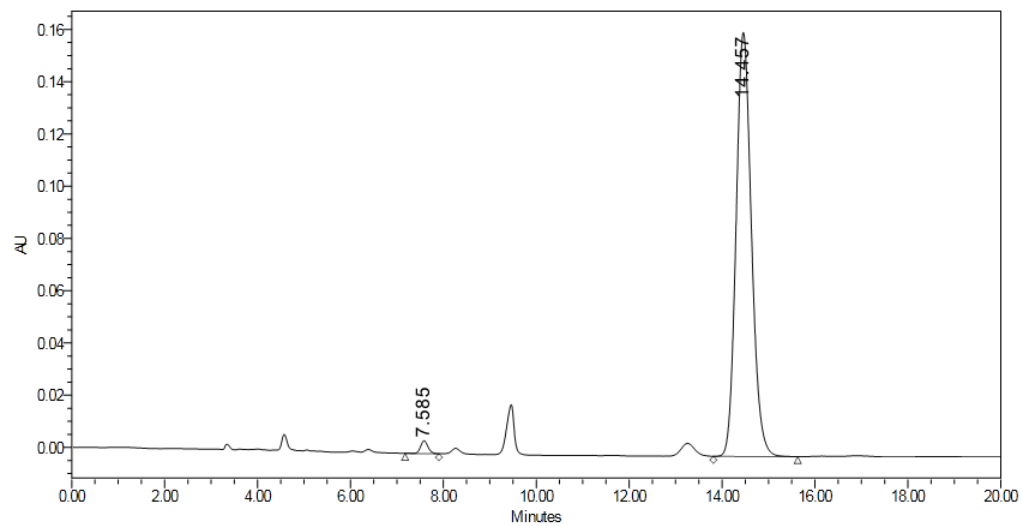

|   | RT<br>(min) | Area<br>(μV*sec) | % Area | Height<br>(μV) | %<br>Height |
|---|-------------|------------------|--------|----------------|-------------|
| 1 | 7.585       | 56049            | 1.48   | 4946           | 2.96        |
| 2 | 14.457      | 3728139          | 98.52  | 162303         | 97.04       |

Compound **4ca**'s  $^1\text{H}$  NMR Spectra

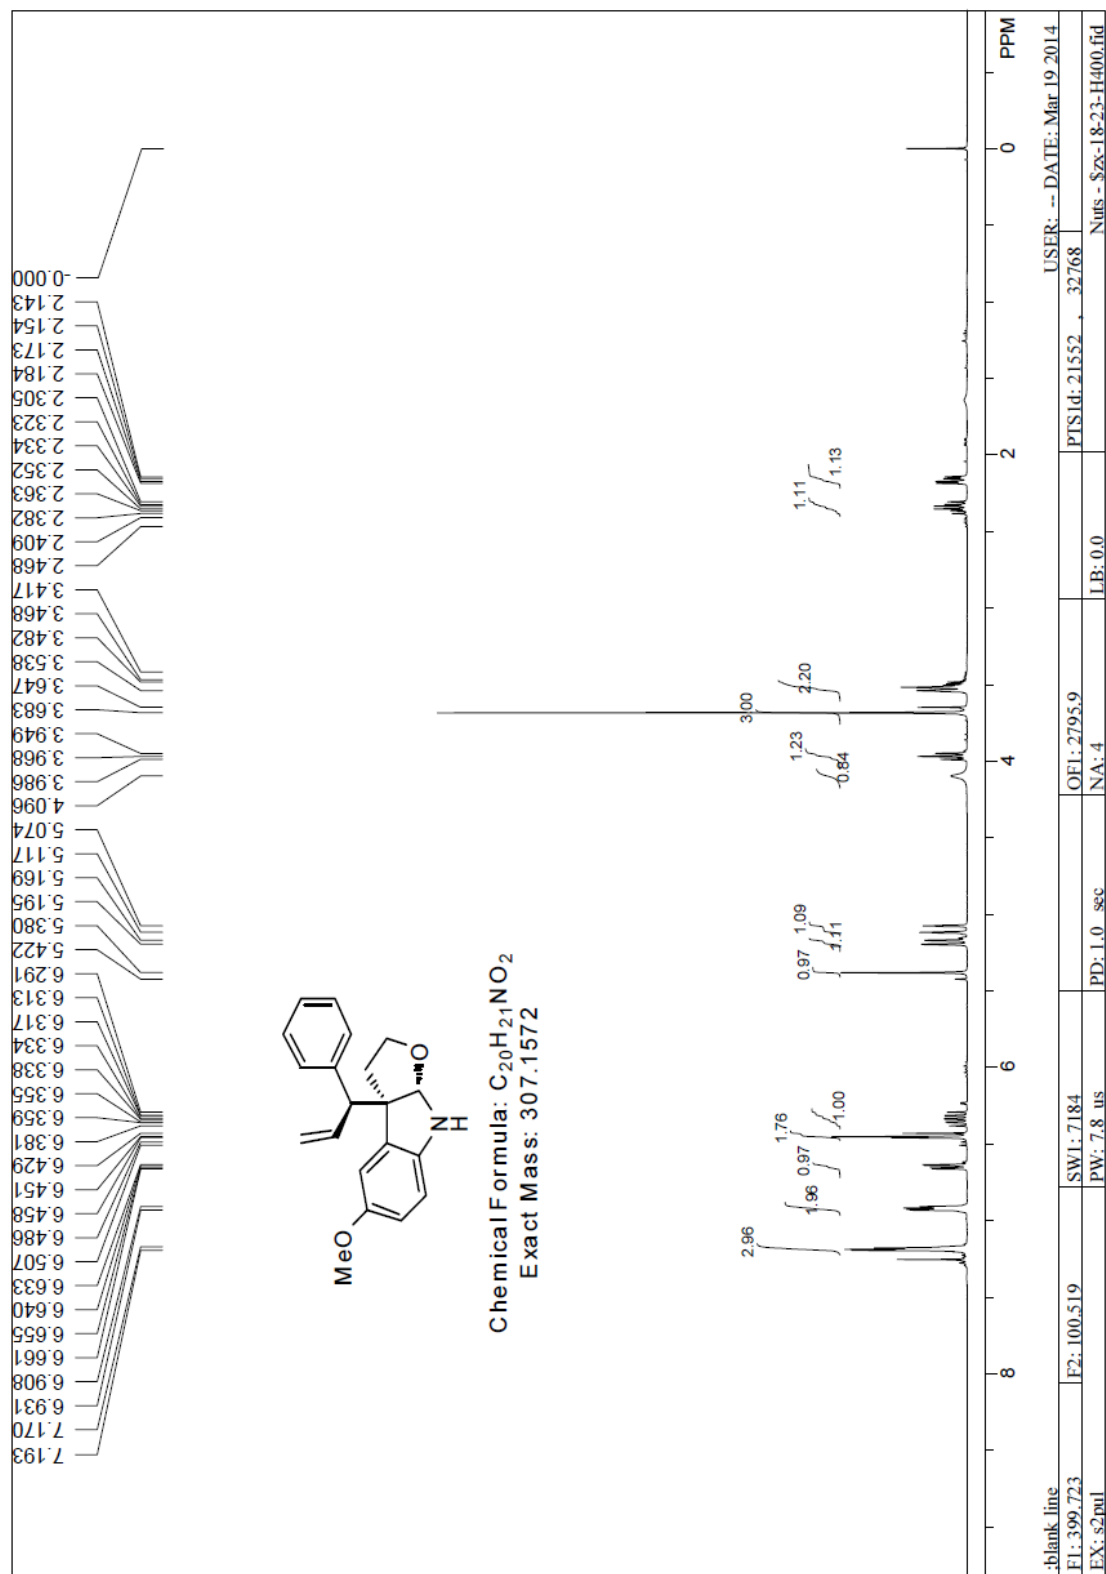

Compound **4ca**'s  $^{13}\text{C}$  NMR Spectra

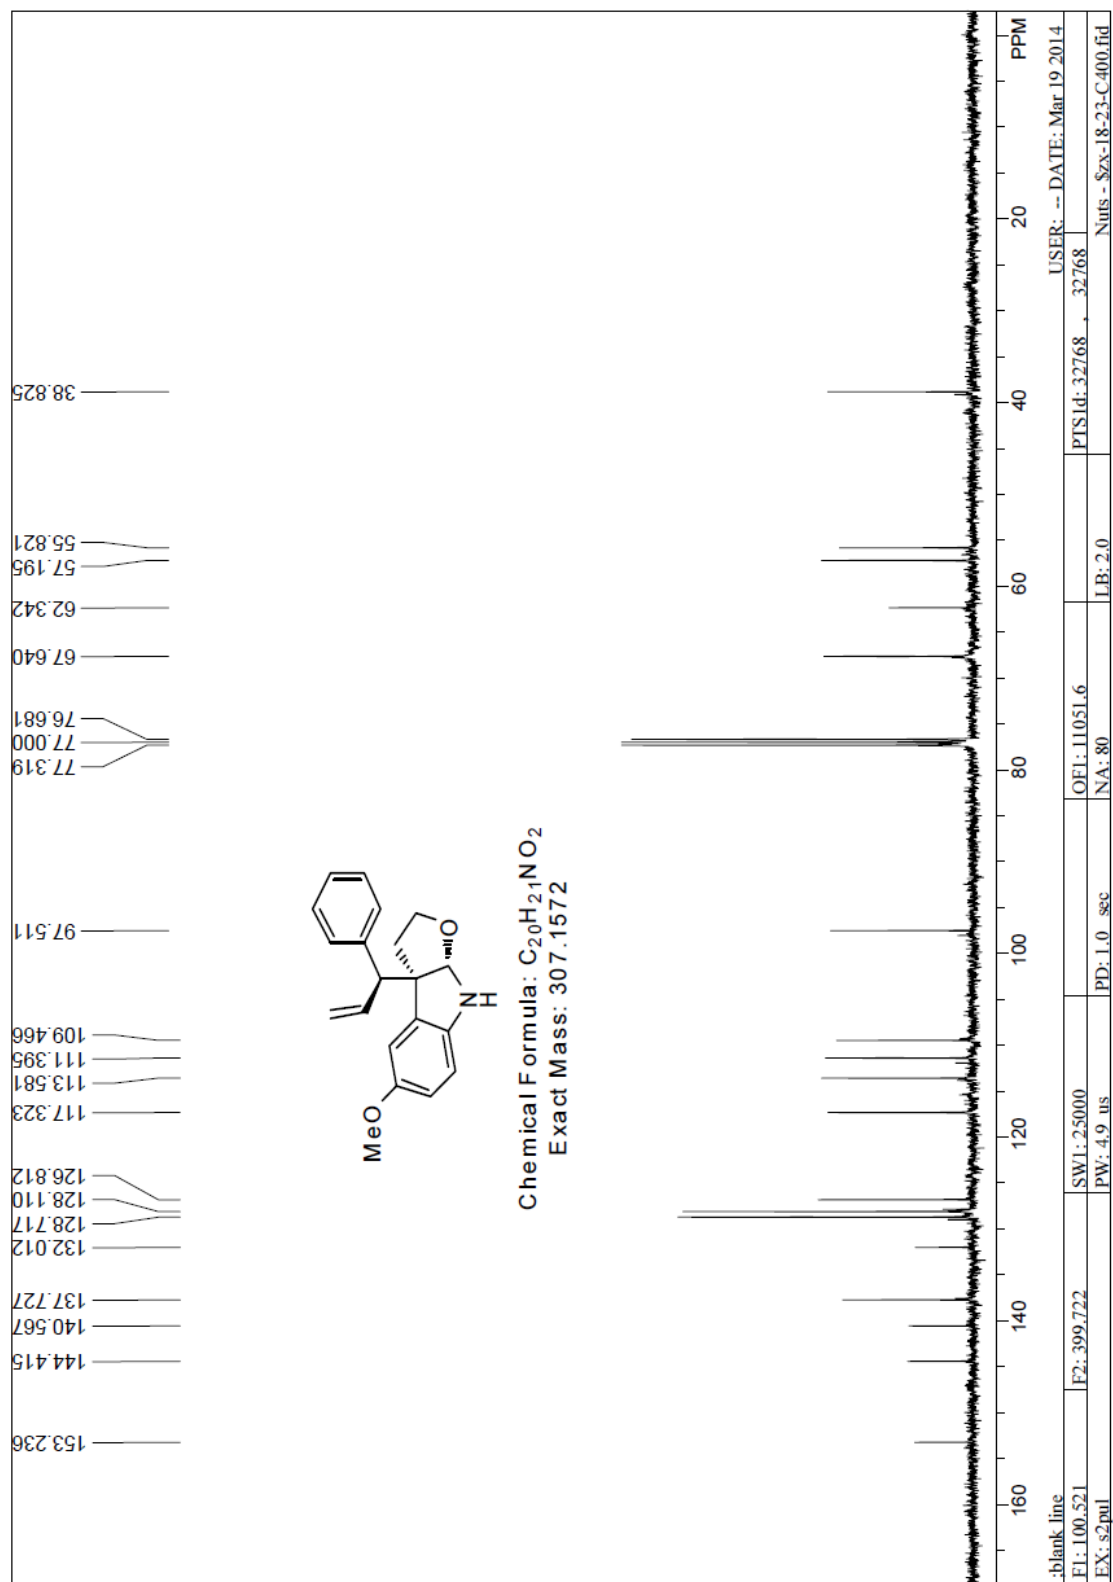

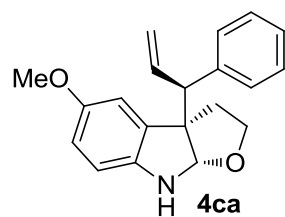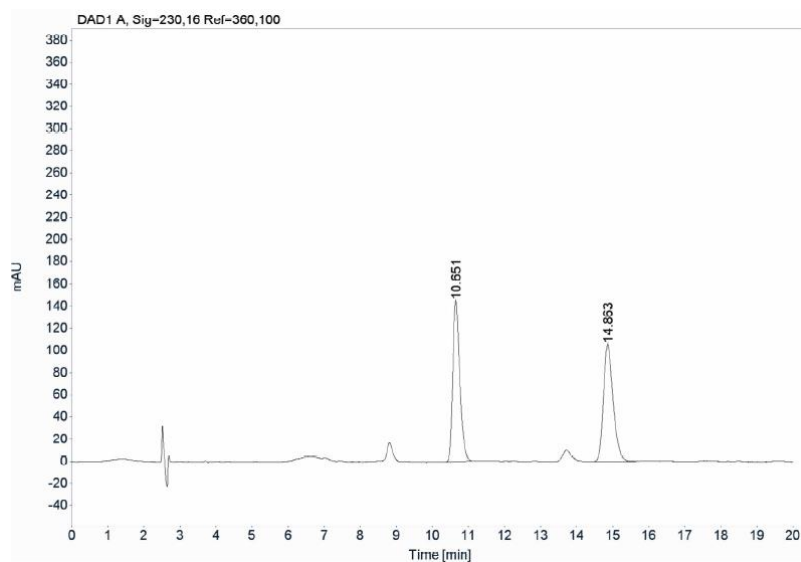

Signal: DAD1 A, Sig=230,16 Ref=360,100

| RT [min] | Type | Width [min] | Area      | Height   | Area%   |
|----------|------|-------------|-----------|----------|---------|
| 10.651   | BB   | 0.2041      | 1949.9290 | 144.7741 | 49.8333 |
| 14.863   | BB   | 0.2819      | 1962.9778 | 105.5728 | 50.1667 |
|          |      | Sum         | 3912.9067 |          |         |

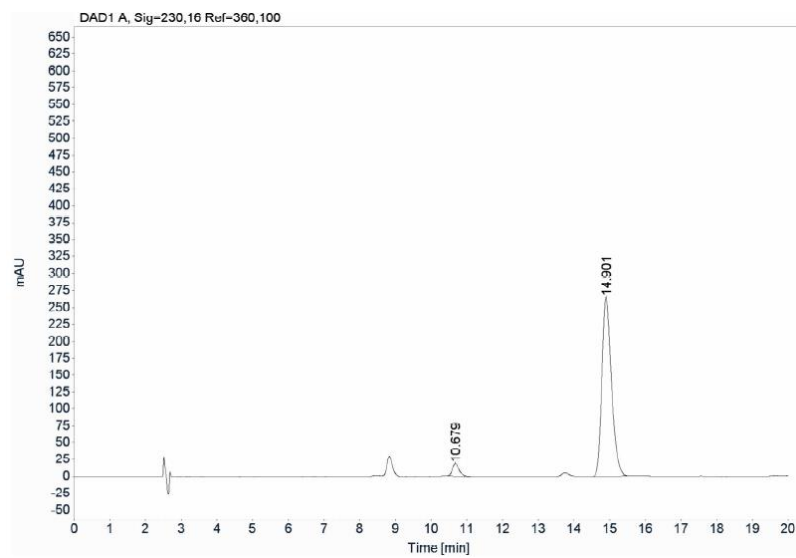

Signal: DAD1 A, Sig=230,16 Ref=360,100

| RT [min] | Type | Width [min] | Area      | Height   | Area%   |
|----------|------|-------------|-----------|----------|---------|
| 10.679   | BB   | 0.1976      | 243.1077  | 18.2250  | 4.6779  |
| 14.901   | BB   | 0.2819      | 4953.8779 | 265.1873 | 95.3221 |
|          |      | Sum         | 5196.9856 |          |         |



Compound **4da**'s  $^1\text{H}$  NMR Spectra

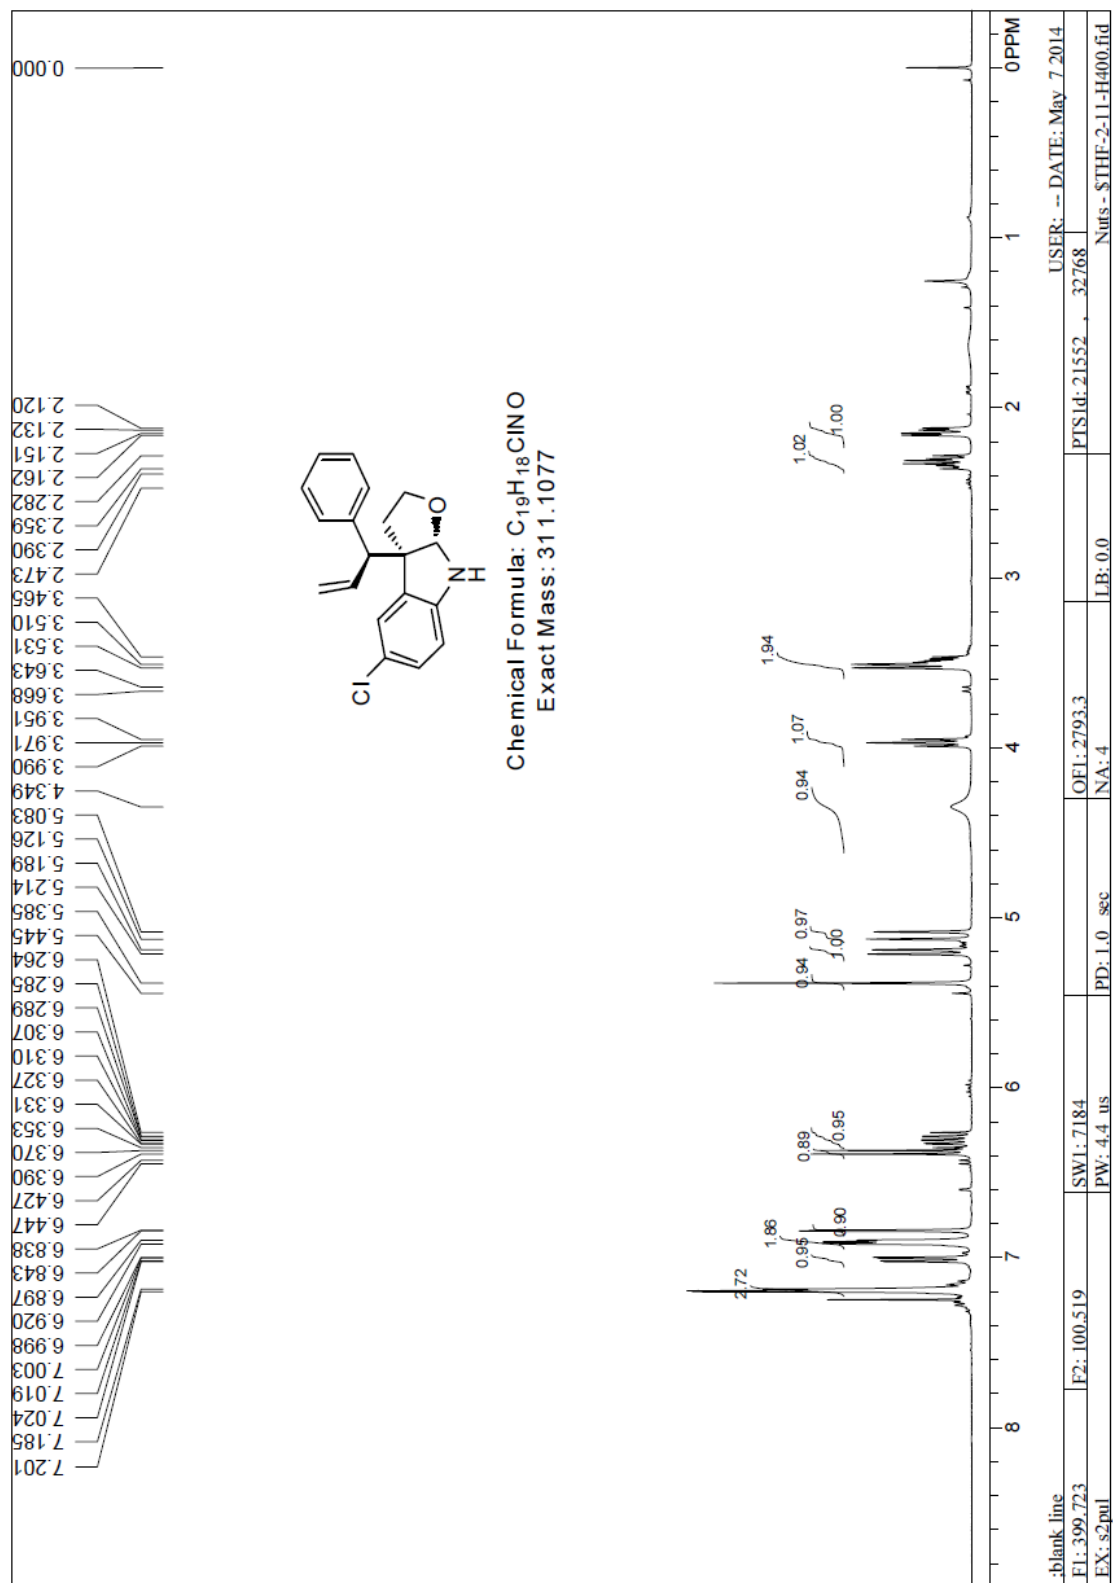

Compound **4da**'s  $^{13}\text{C}$  NMR Spectra

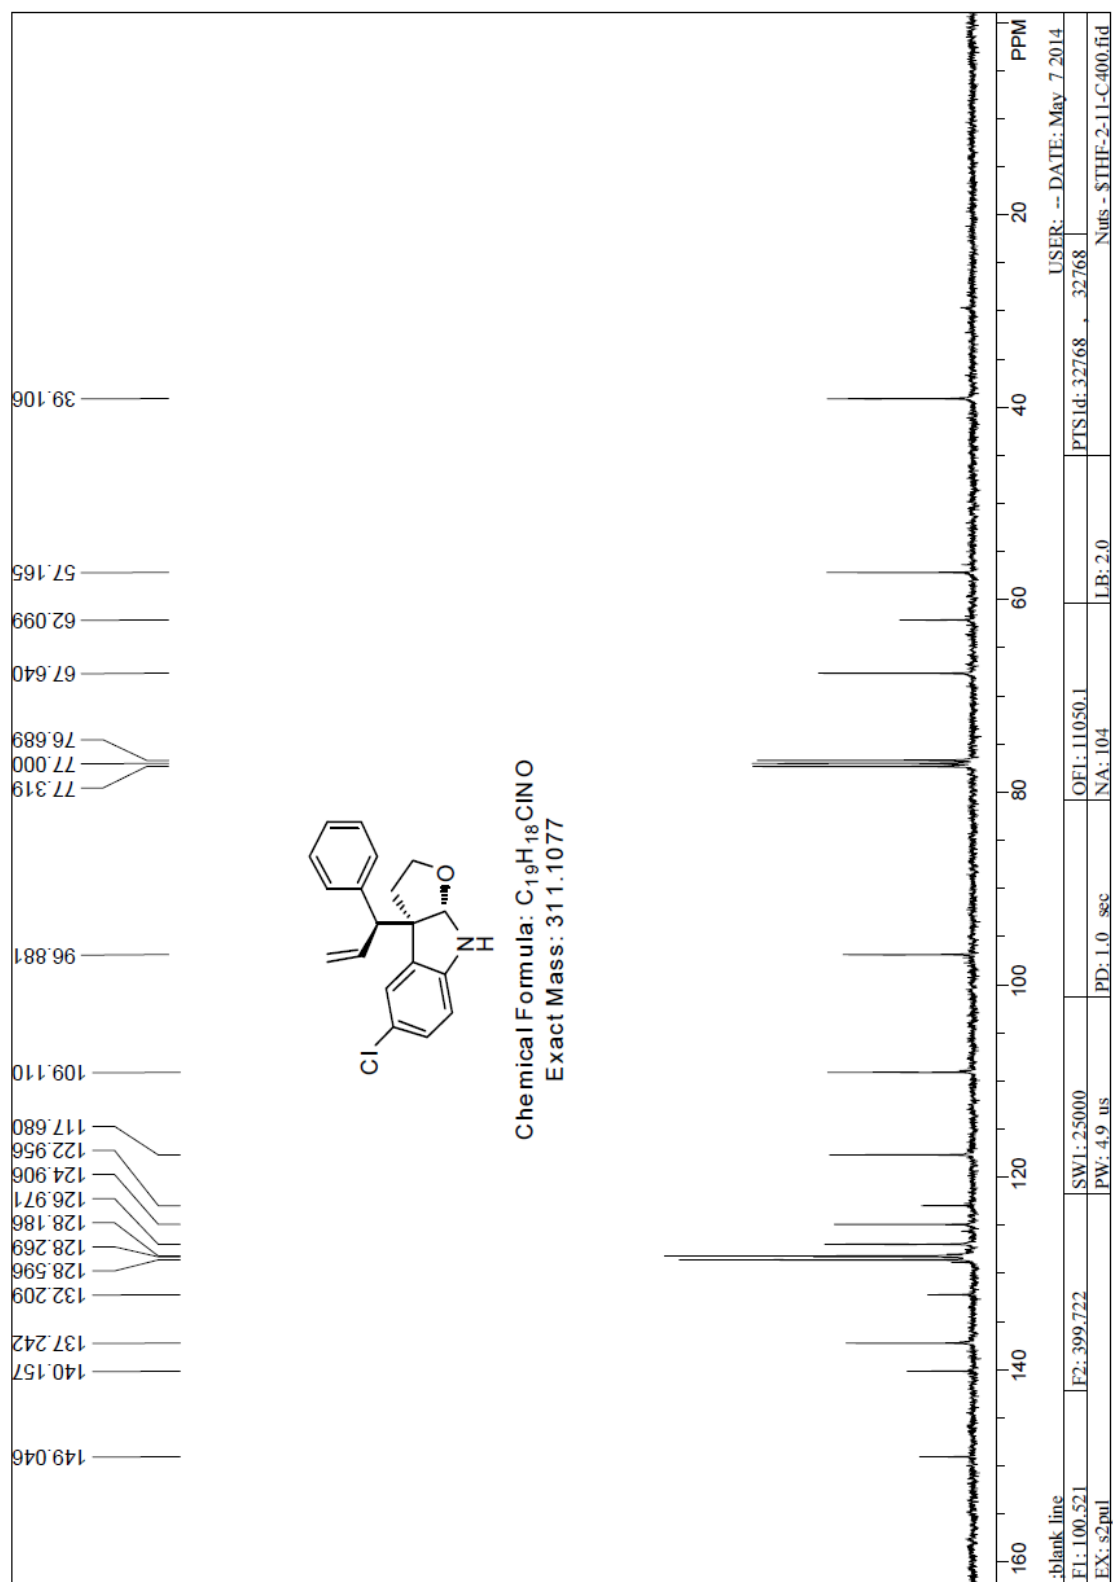

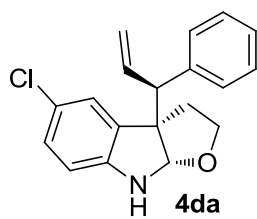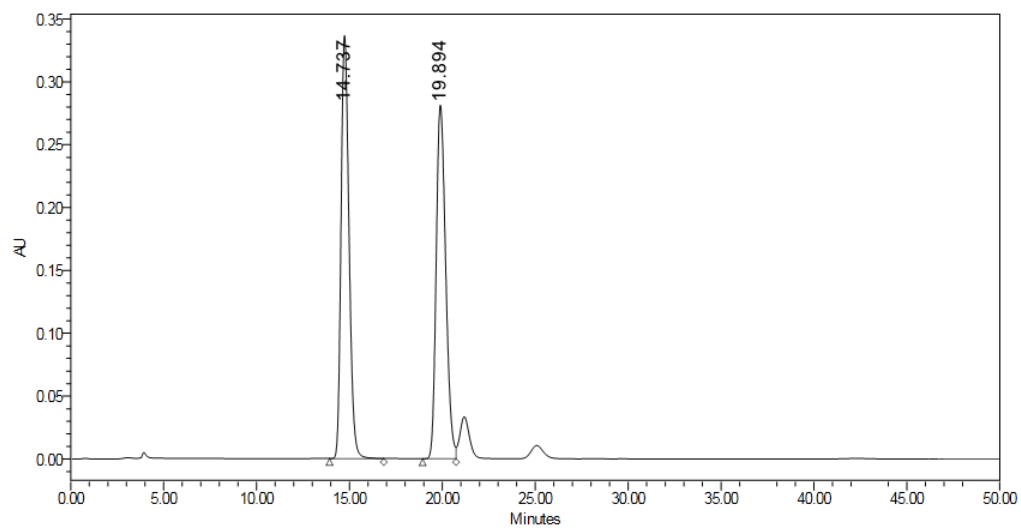

|   | RT<br>(min) | Area<br>(μV*sec) | % Area | Height<br>(μV) | %<br>Height |
|---|-------------|------------------|--------|----------------|-------------|
| 1 | 14.737      | 10014085         | 50.06  | 336639         | 54.48       |
| 2 | 19.894      | 9989428          | 49.94  | 281275         | 45.52       |

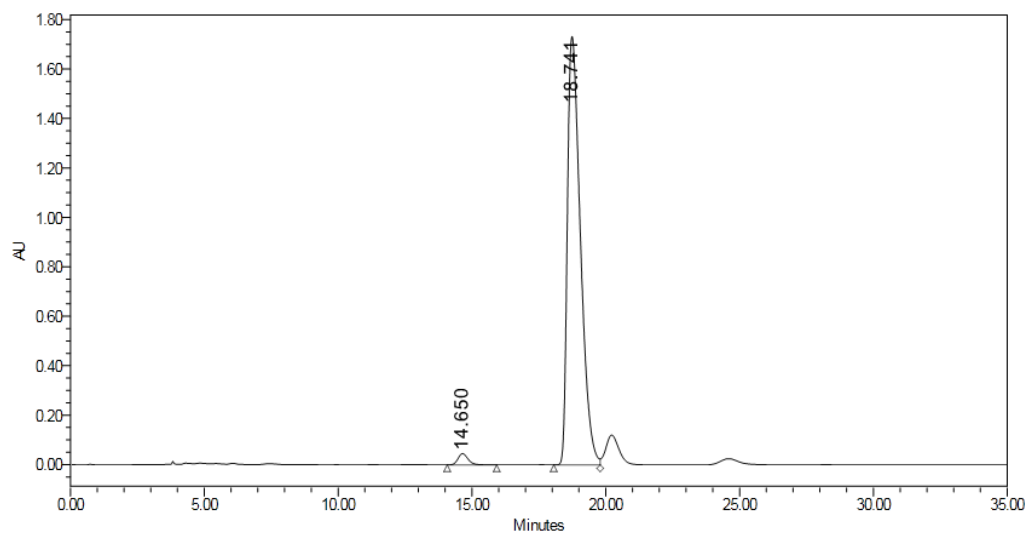

|   | RT<br>(min) | Area<br>(μV*sec) | % Area | Height<br>(μV) | %<br>Height |
|---|-------------|------------------|--------|----------------|-------------|
| 1 | 14.650      | 1186715          | 1.99   | 45626          | 2.56        |
| 2 | 18.741      | 58548380         | 98.01  | 1733400        | 97.44       |

Compound **4ea**'s  $^1\text{H}$  NMR Spectra

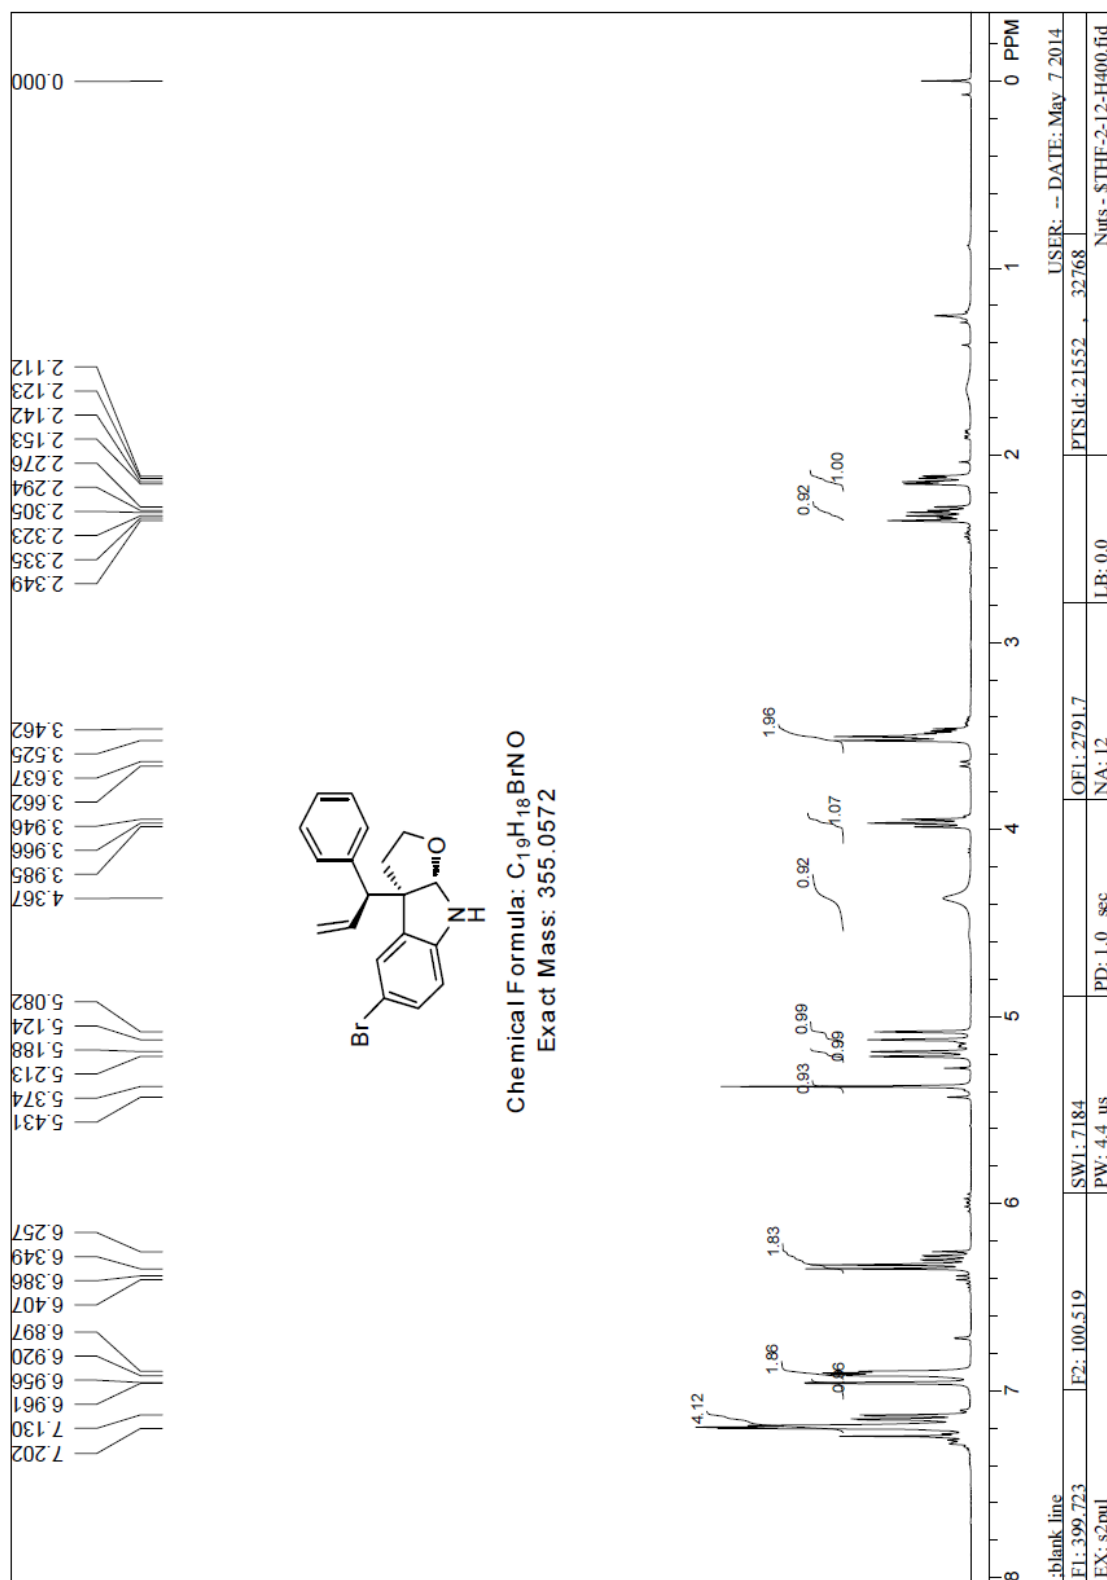

Compound **4ea**'s  $^{13}\text{C}$  NMR Spectra

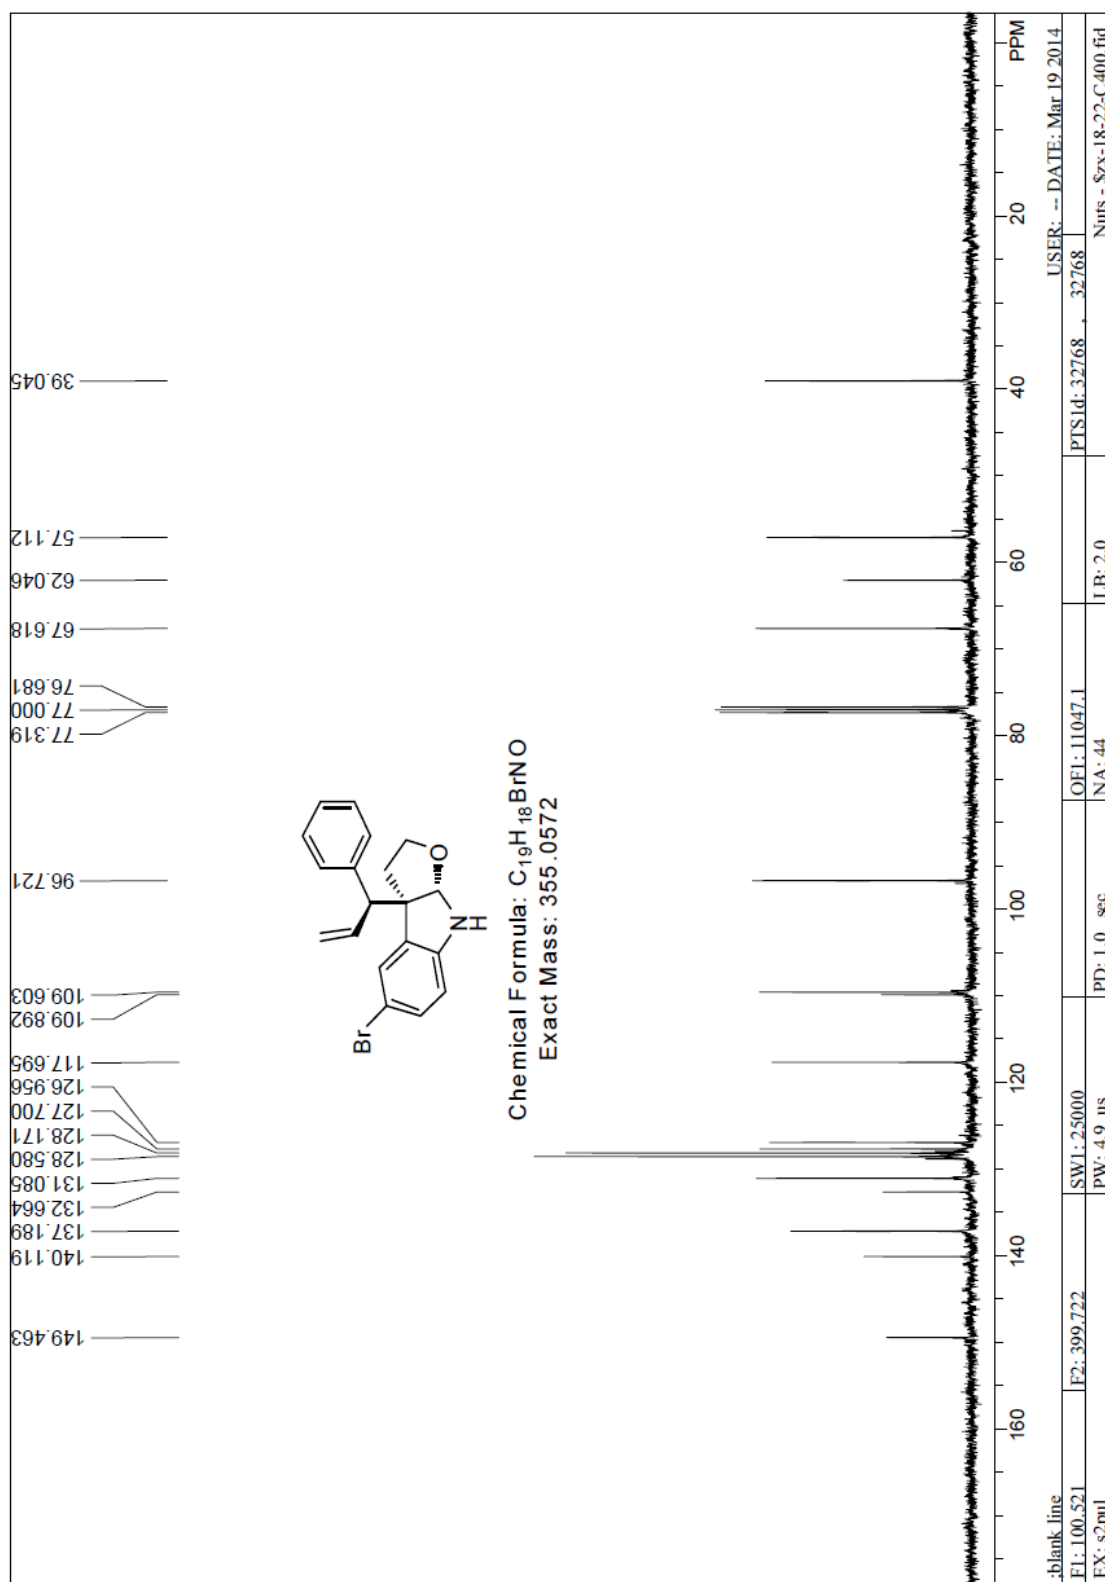

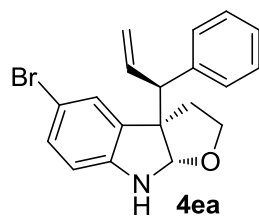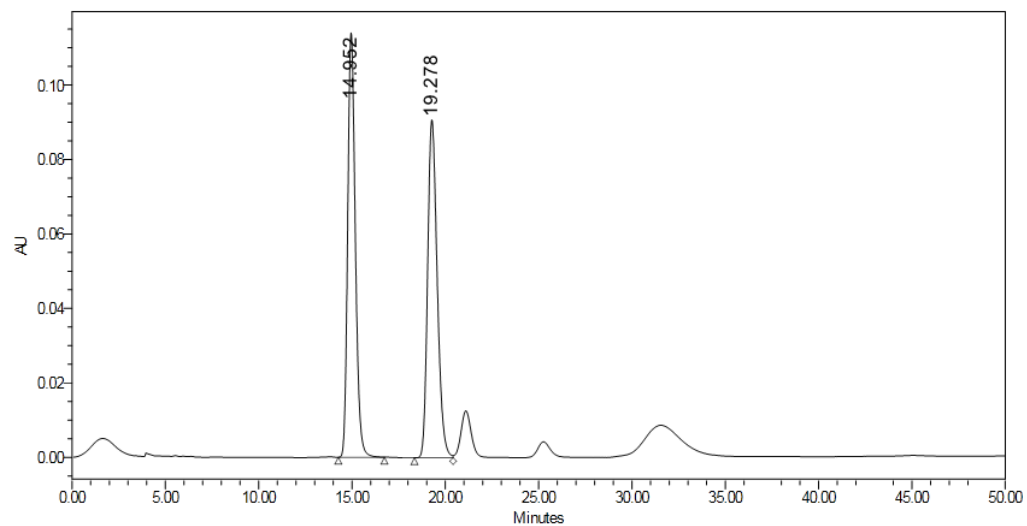

|   | RT<br>(min) | Area<br>( $\mu\text{V}\cdot\text{sec}$ ) | % Area | Height<br>( $\mu\text{V}$ ) | % Height |
|---|-------------|------------------------------------------|--------|-----------------------------|----------|
| 1 | 14.952      | 3230780                                  | 50.01  | 113974                      | 55.68    |
| 2 | 19.278      | 3229544                                  | 49.99  | 90723                       | 44.32    |

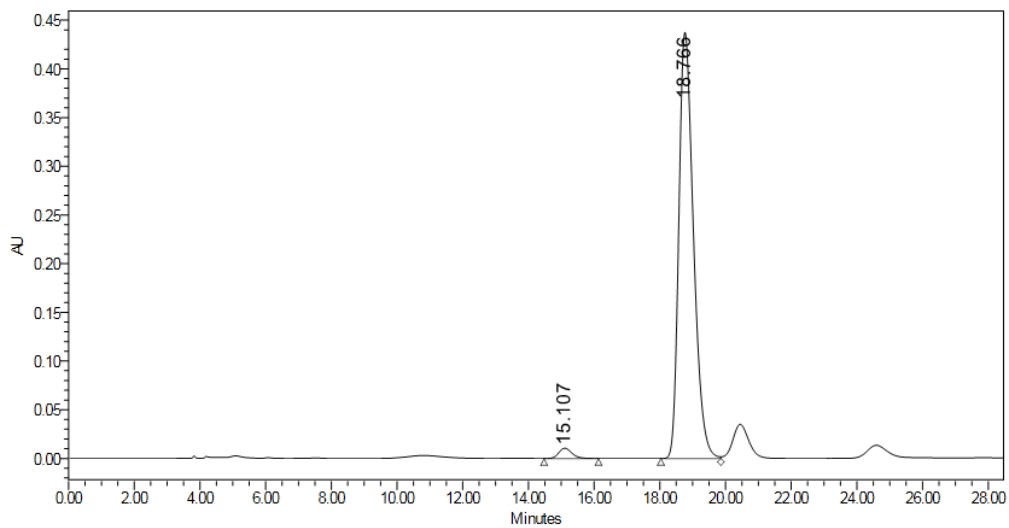

|   | RT<br>(min) | Area<br>( $\mu\text{V}\cdot\text{sec}$ ) | % Area | Height<br>( $\mu\text{V}$ ) | % Height |
|---|-------------|------------------------------------------|--------|-----------------------------|----------|
| 1 | 15.107      | 293327                                   | 2.13   | 10610                       | 2.37     |
| 2 | 18.766      | 13503892                                 | 97.87  | 437543                      | 97.63    |

Compound **4fa**'s  $^1\text{H}$  NMR Spectra

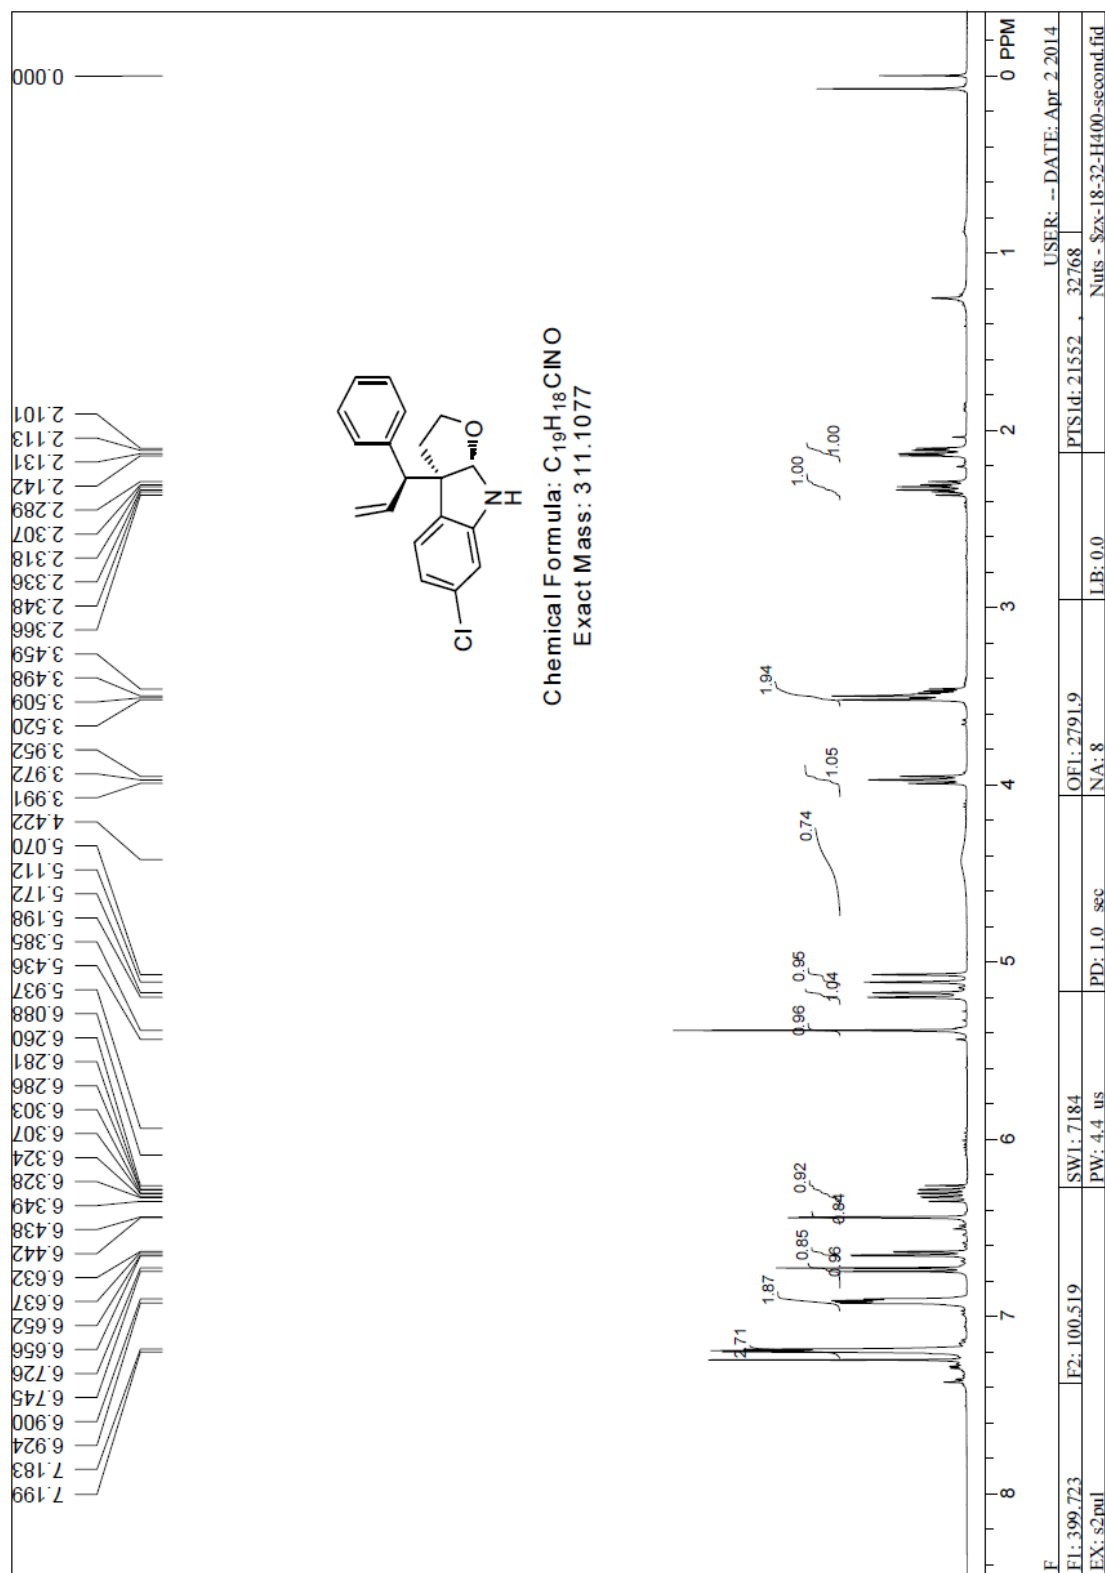

Compound **4fa**'s  $^{13}\text{C}$  NMR Spectra

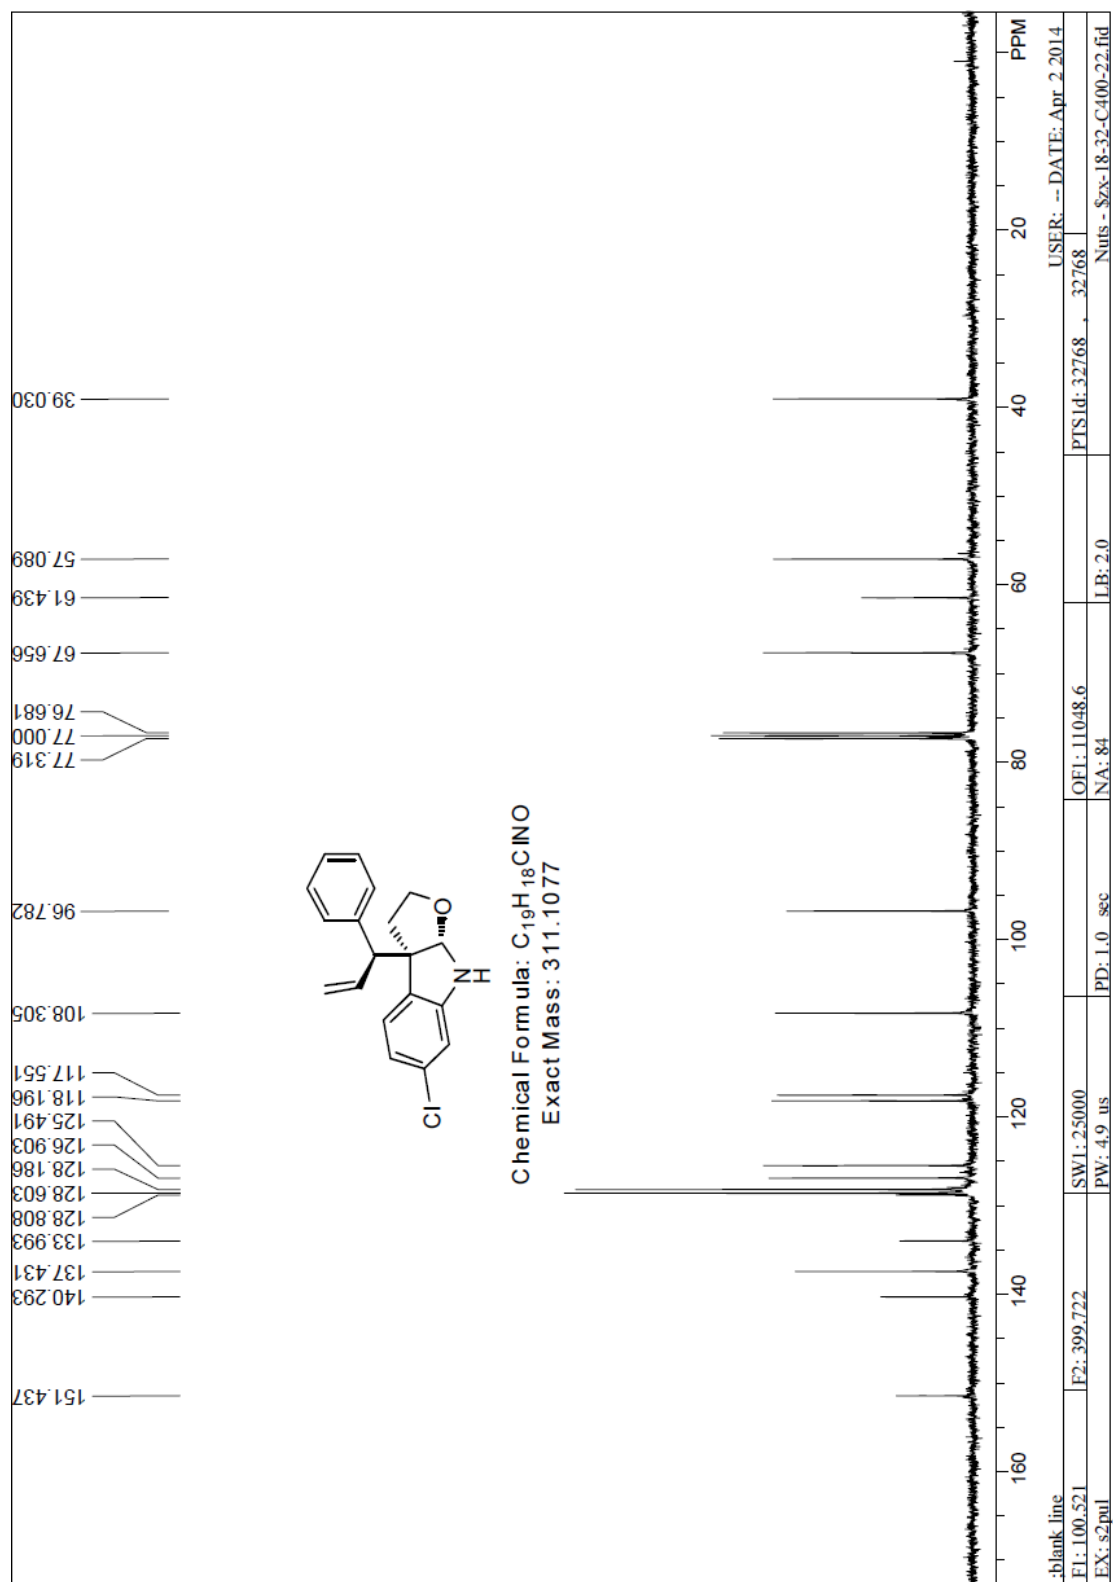



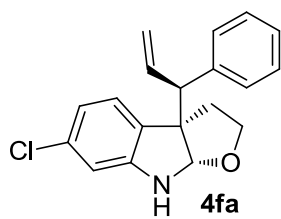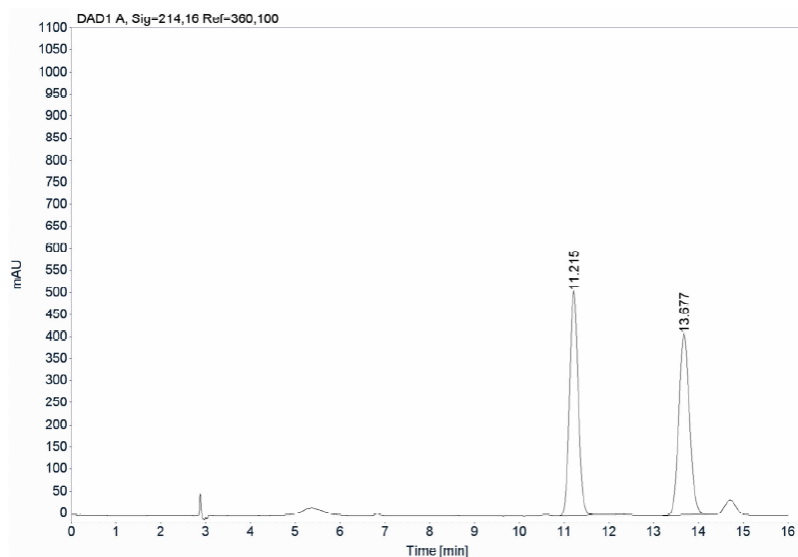

Signal: DAD1 A, Sig=214,16 Ref=360,100

| RT [min] | Type | Width [min] | Area       | Height   | Area%   |
|----------|------|-------------|------------|----------|---------|
| 11.215   | BB   | 0.2076      | 6742.8496  | 505.6886 | 49.7880 |
| 13.677   | MM R | 0.2684      | 6800.2817  | 408.8831 | 50.2120 |
|          | Sum  |             | 13543.1313 |          |         |

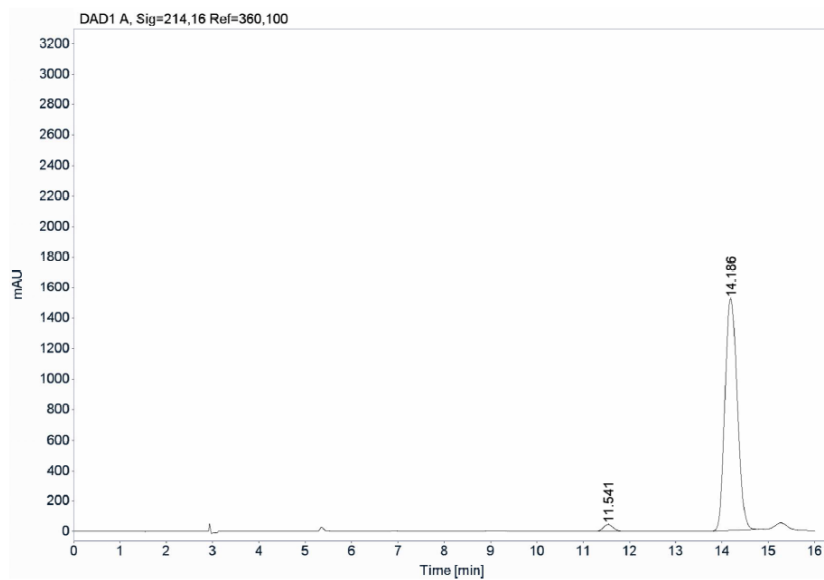

Signal: DAD1 A, Sig=214,16 Ref=360,100

| RT [min] | Type | Width [min] | Area       | Height    | Area%   |
|----------|------|-------------|------------|-----------|---------|
| 11.541   | MM R | 0.2437      | 678.4547   | 45.7319   | 2.3628  |
| 14.186   | BB   | 0.2914      | 28036.0645 | 1518.6459 | 97.6372 |
|          | Sum  |             | 28714.5192 |           |         |

Compound **4ga**'s  $^1\text{H}$  NMR Spectra

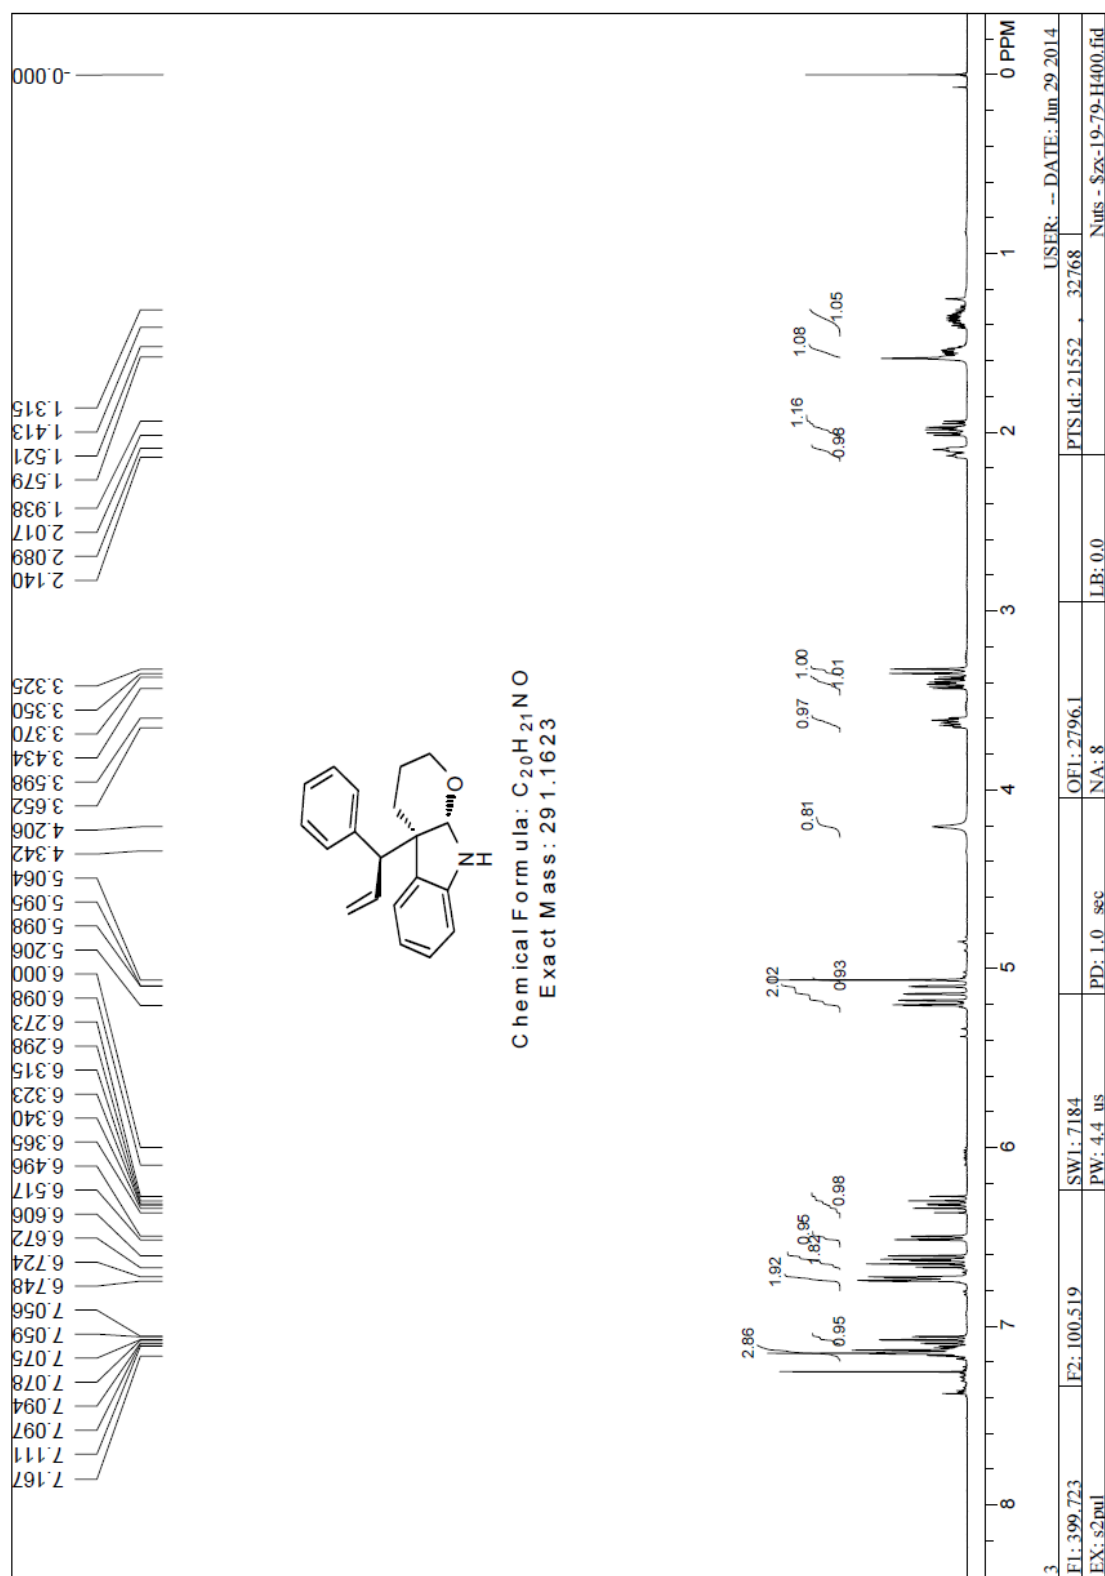

Compound **4ga**'s  $^{13}\text{C}$  NMR Spectra

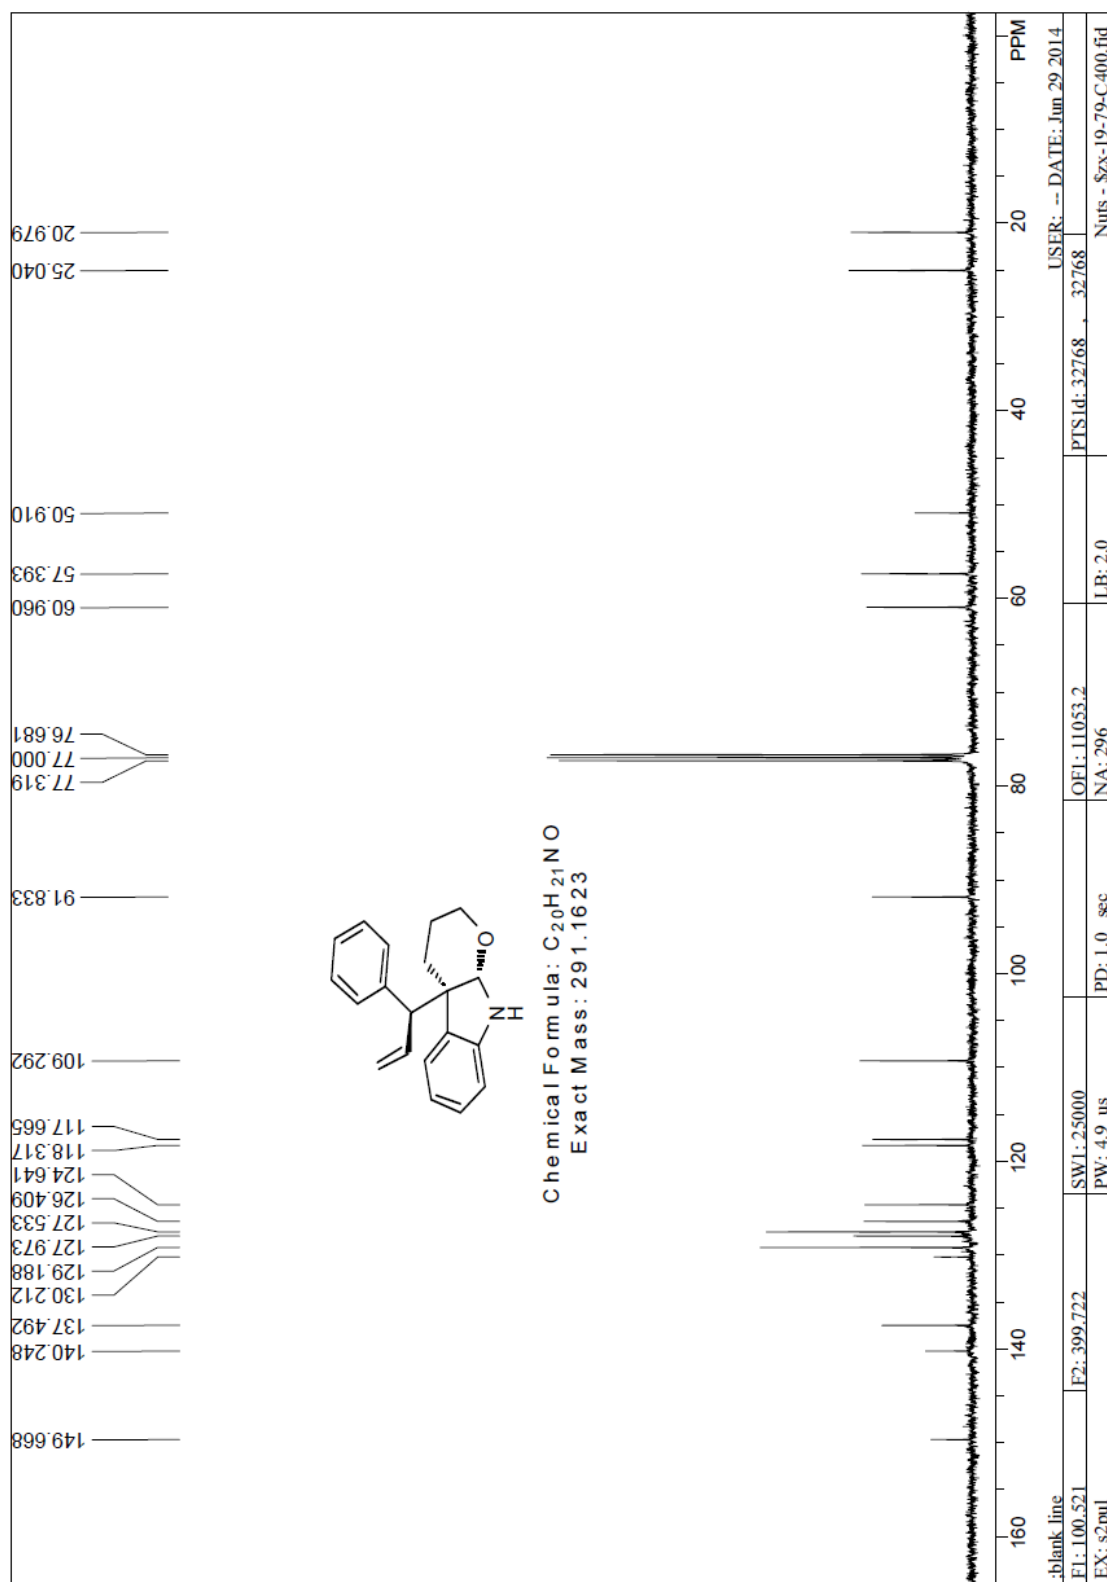

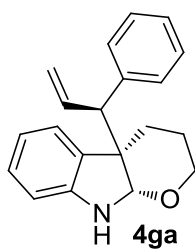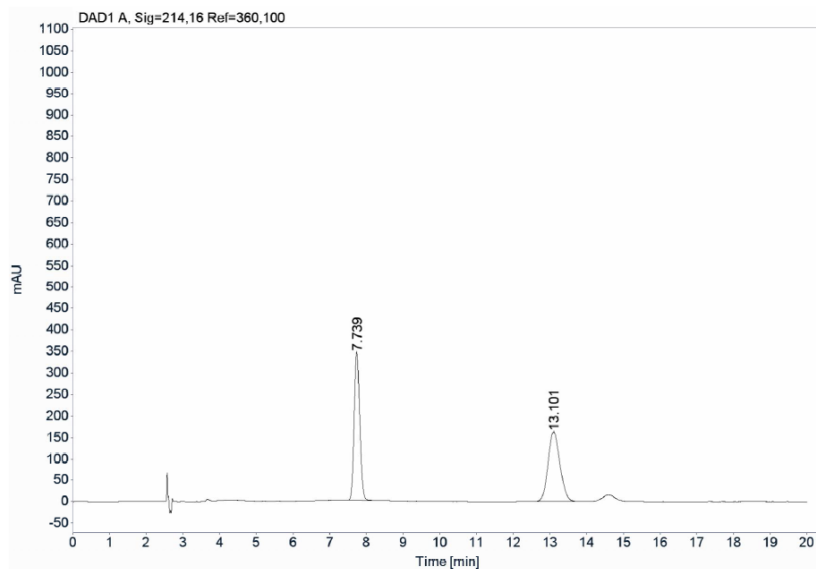

Signal: DAD1 A, Sig=214,16 Ref=360,100

| RT [min] | Type | Width [min] | Area      | Height   | Area%   |
|----------|------|-------------|-----------|----------|---------|
| 7.739    | BV   | 0.1658      | 3622.7561 | 344.1260 | 49.7159 |
| 13.101   | BB   | 0.3490      | 3664.1548 | 162.5724 | 50.2841 |
|          | Sum  |             | 7286.9109 |          |         |

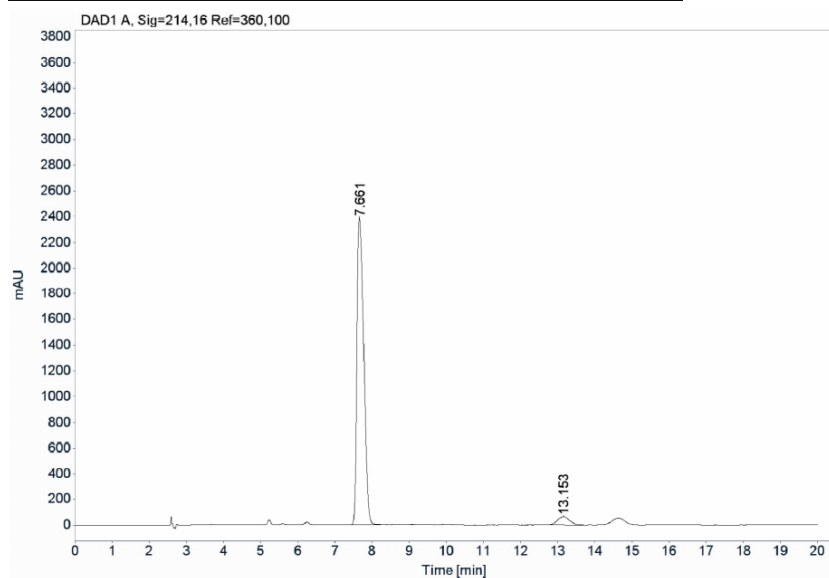

Signal: DAD1 A, Sig=214,16 Ref=360,100

| RT [min] | Type | Width [min] | Area       | Height    | Area%   |
|----------|------|-------------|------------|-----------|---------|
| 7.661    | BV   | 0.2121      | 30921.7695 | 2387.7576 | 95.5608 |
| 13.153   | BB   | 0.3437      | 1436.4531  | 63.5545   | 4.4392  |
|          | Sum  |             | 32358.2227 |           |         |

Compound **4ha**'s  $^1\text{H}$  NMR Spectra

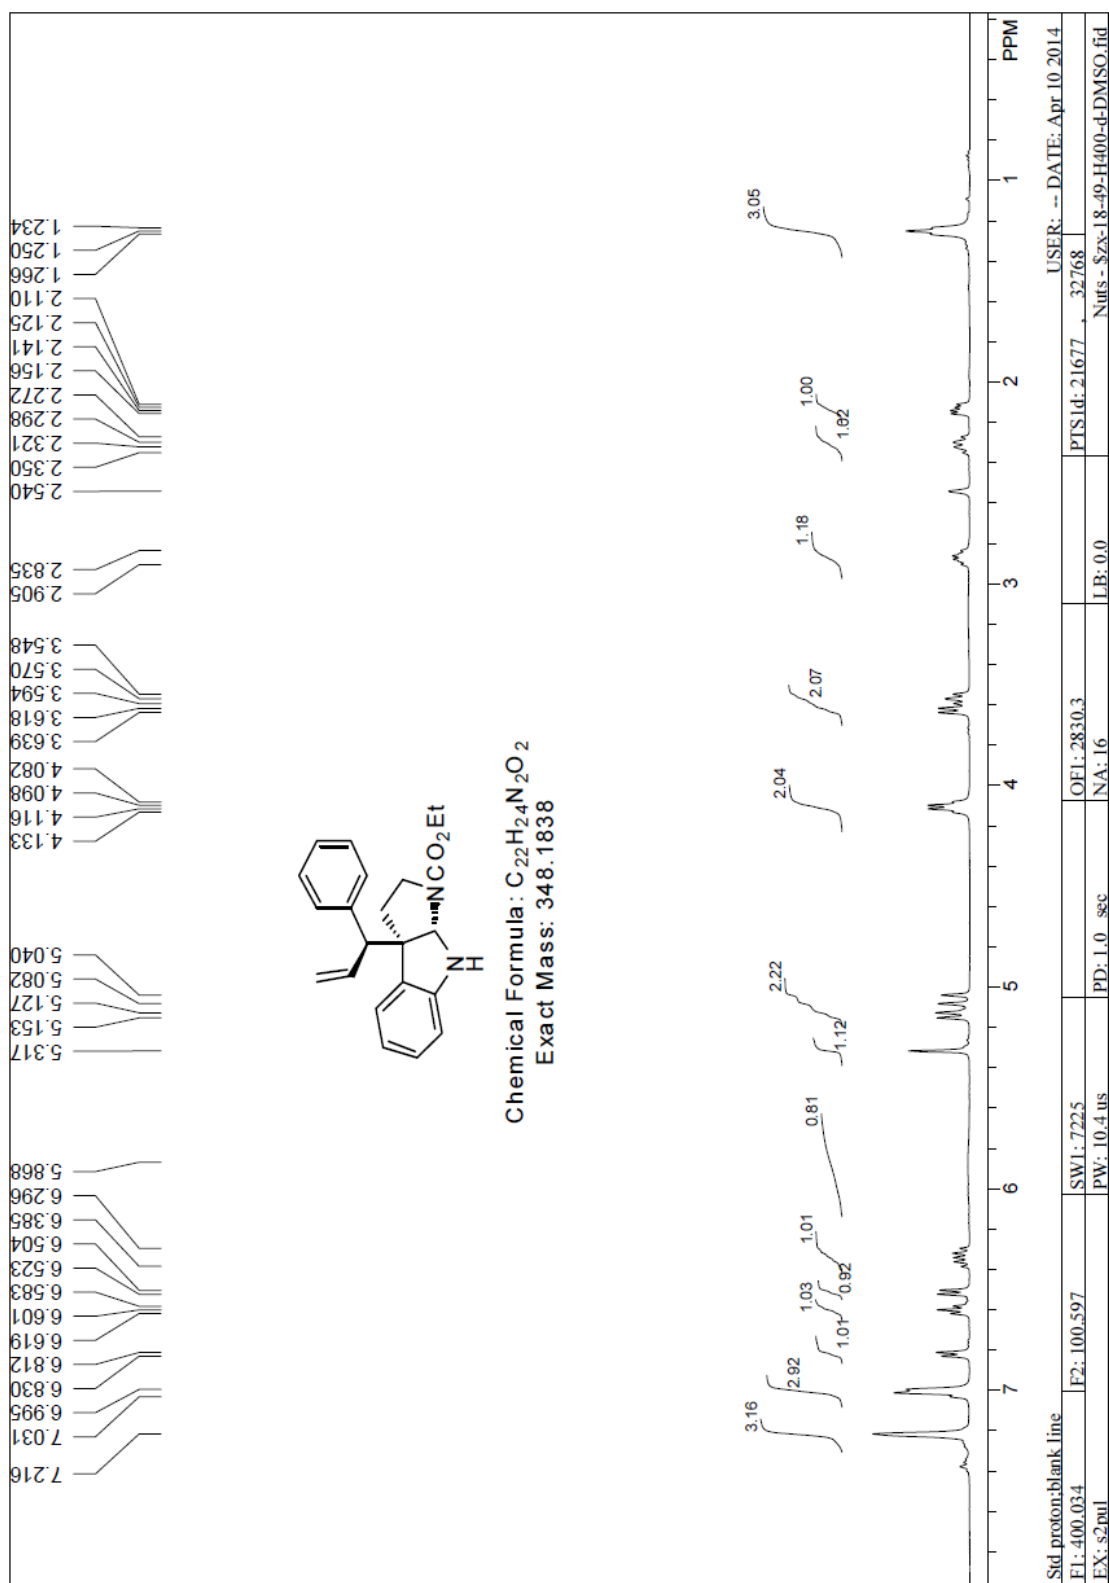

Compound **4ha**'s  $^{13}\text{C}$  NMR Spectra

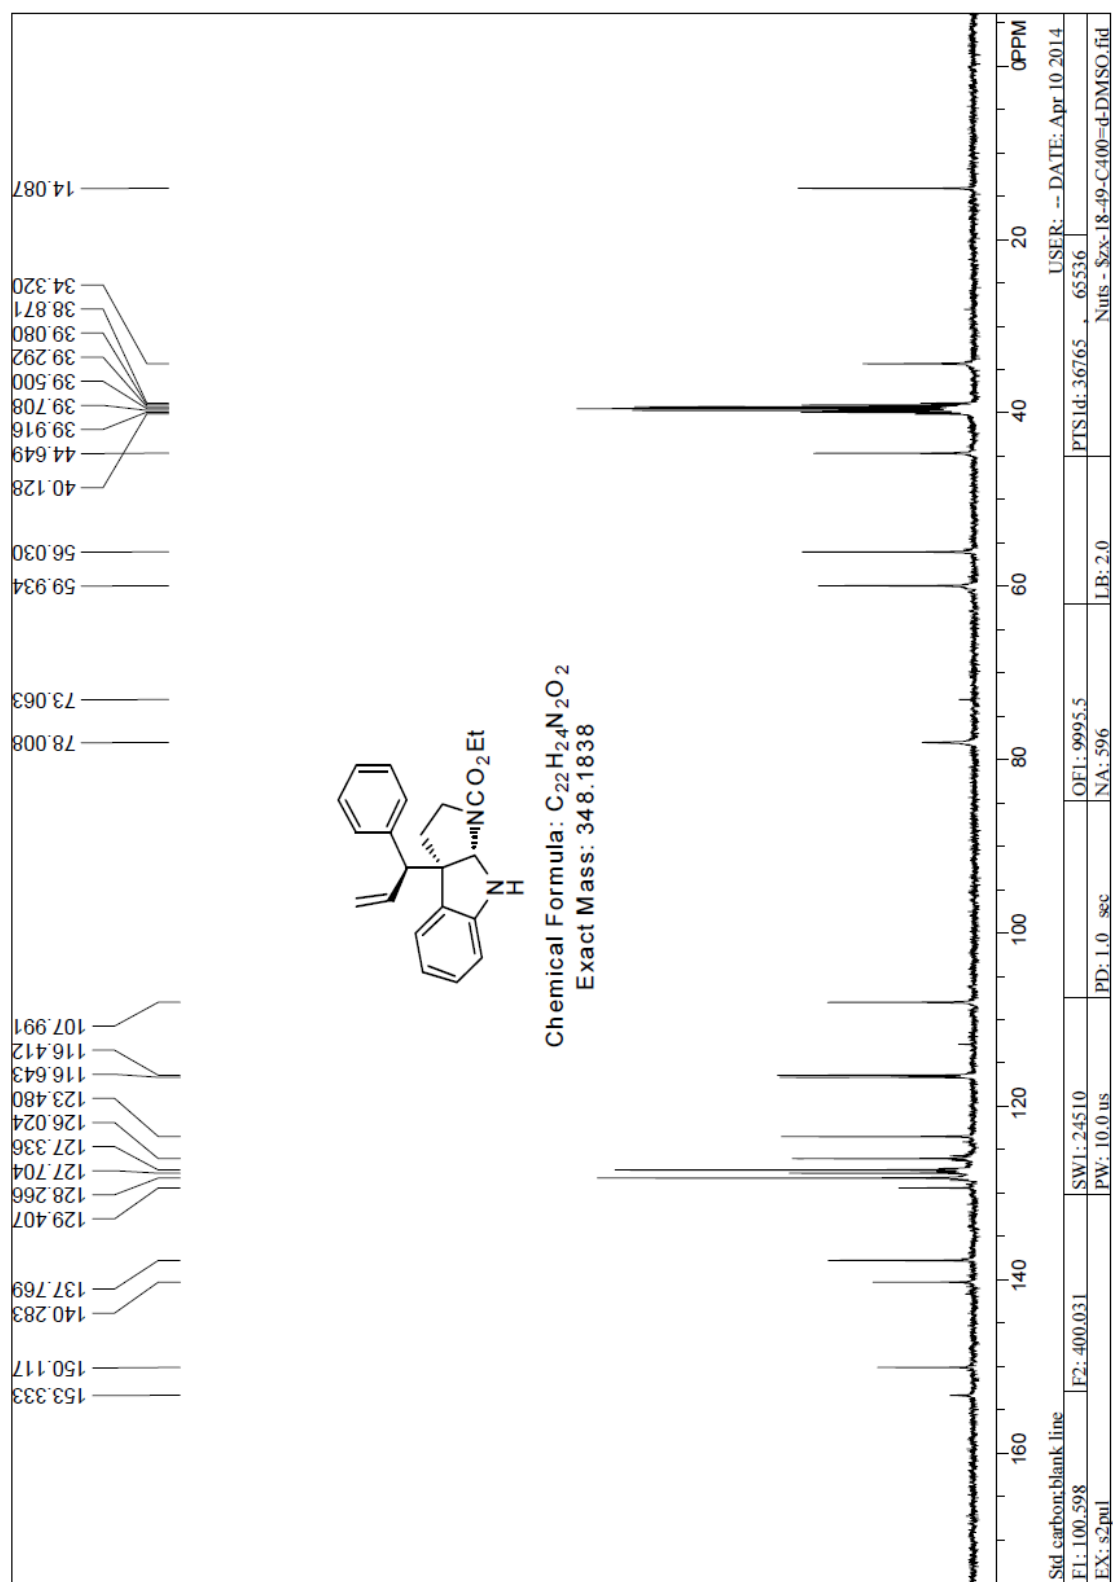

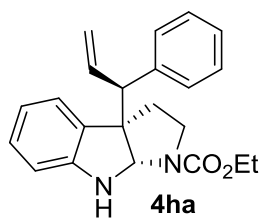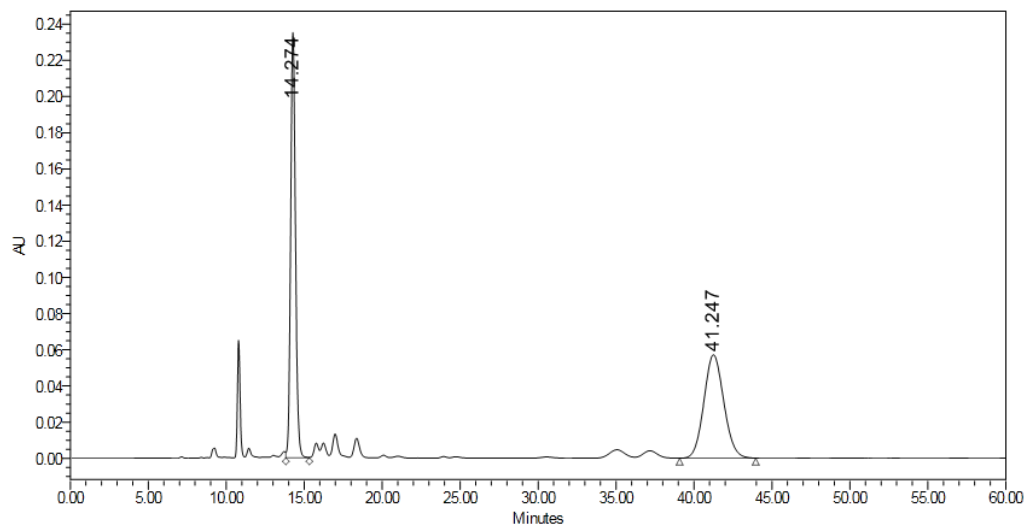

|   | RT<br>(min) | Area<br>( $\mu\text{V}\cdot\text{sec}$ ) | % Area | Height<br>( $\mu\text{V}$ ) | % Height |
|---|-------------|------------------------------------------|--------|-----------------------------|----------|
| 1 | 14.274      | 5081346                                  | 50.06  | 235135                      | 80.45    |
| 2 | 41.247      | 5069507                                  | 49.94  | 57125                       | 19.55    |

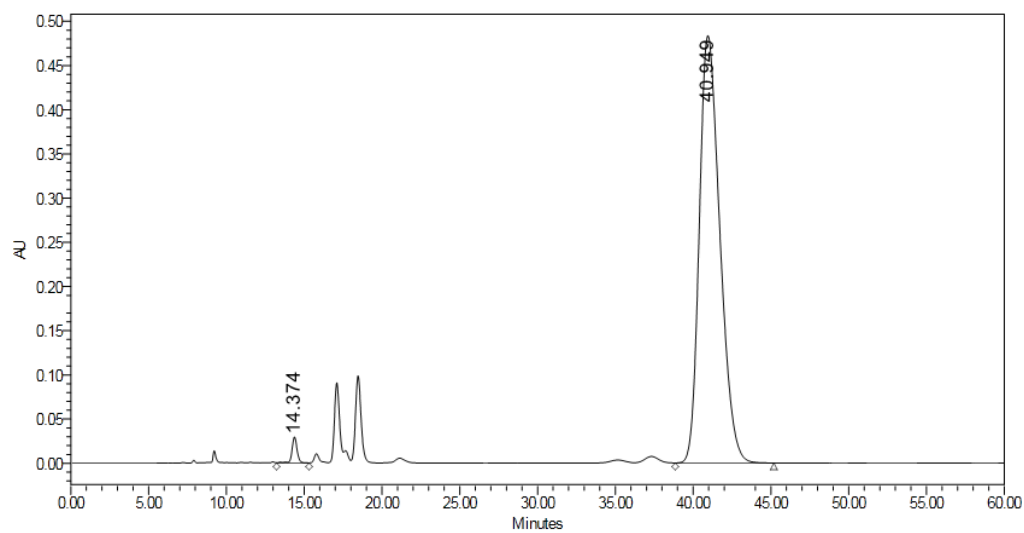

|   | RT<br>(min) | Area<br>( $\mu\text{V}\cdot\text{sec}$ ) | % Area | Height<br>( $\mu\text{V}$ ) | % Height |
|---|-------------|------------------------------------------|--------|-----------------------------|----------|
| 1 | 14.374      | 692763                                   | 1.54   | 29551                       | 5.76     |
| 2 | 40.949      | 44379925                                 | 98.46  | 483594                      | 94.24    |

Compound **4ia**'s  $^1\text{H}$  NMR Spectra

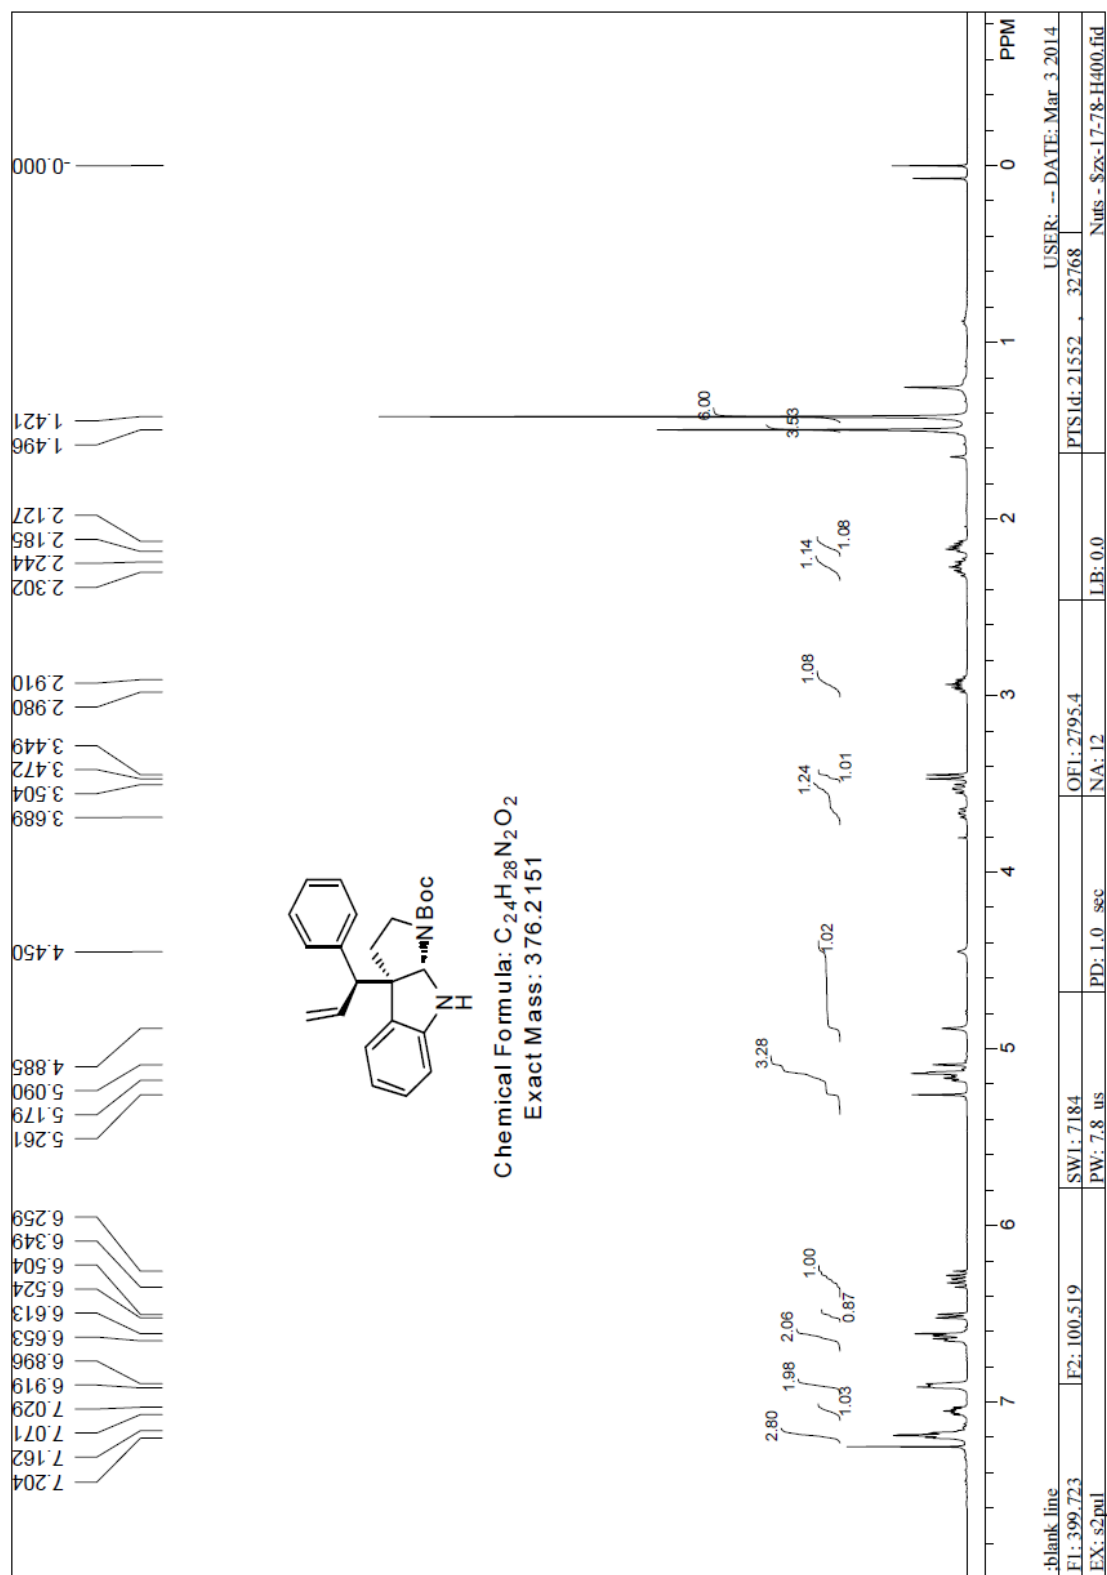



Compound **4ia**'s  $^{13}\text{C}$  NMR Spectra

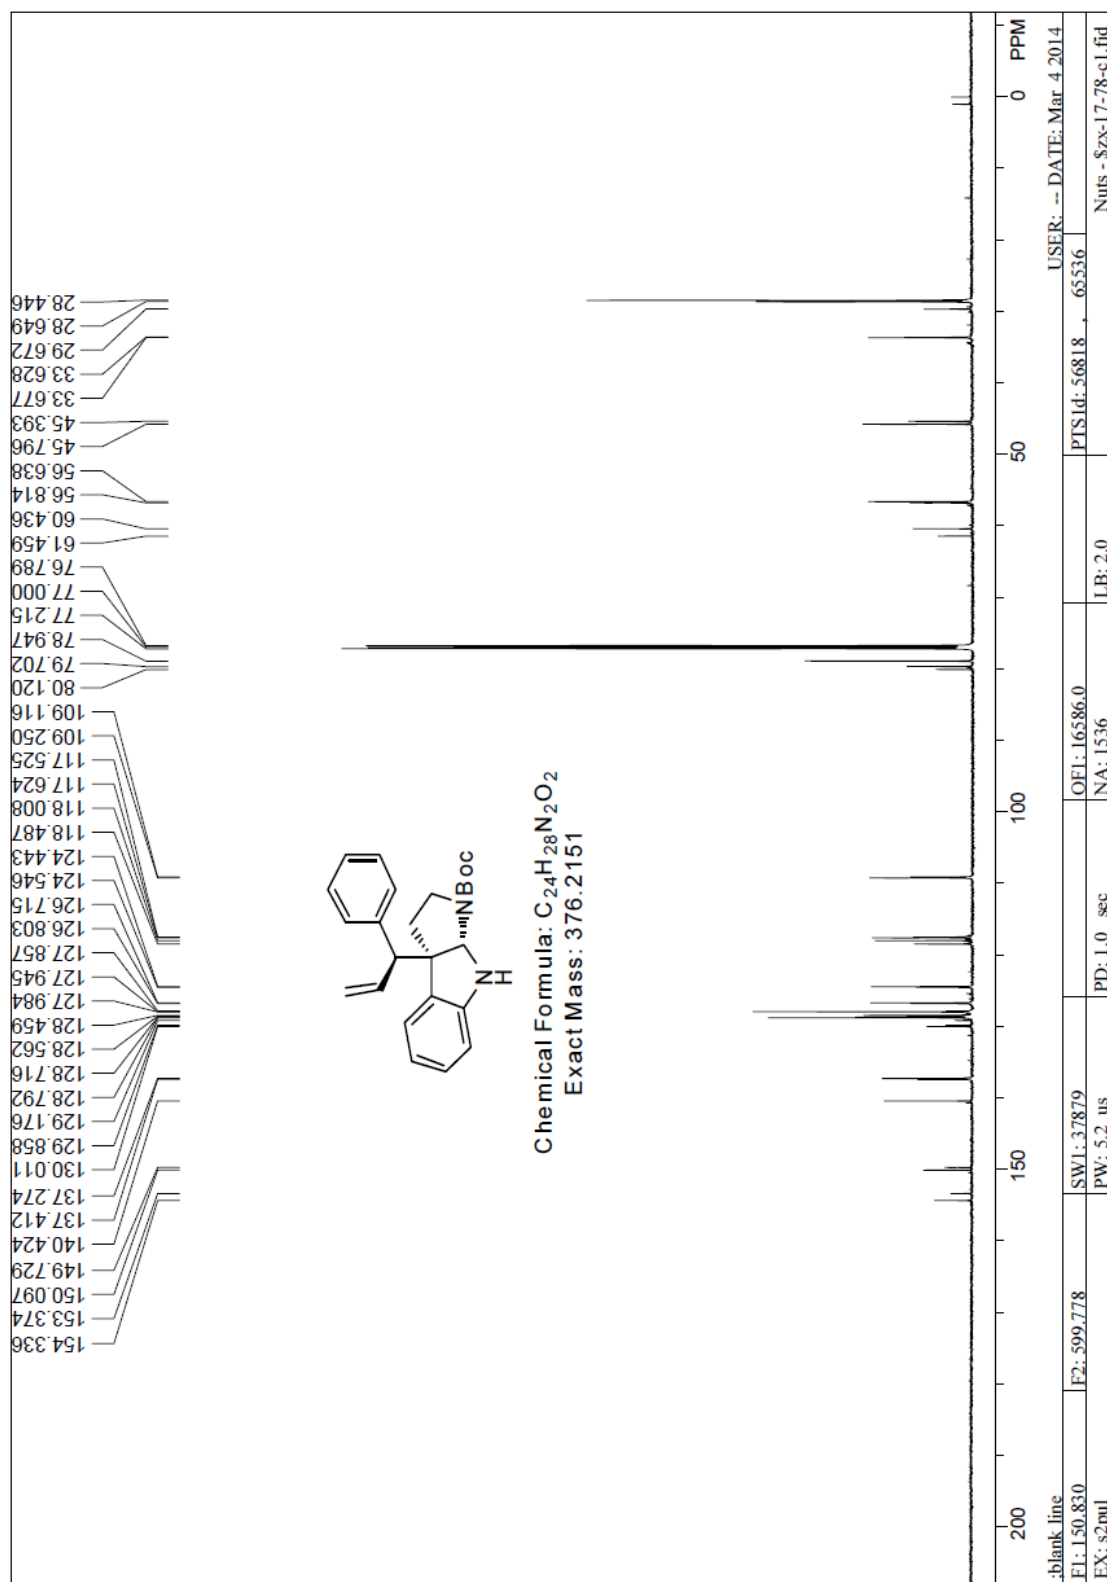

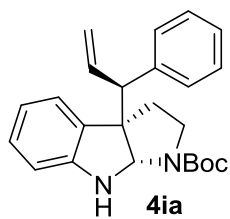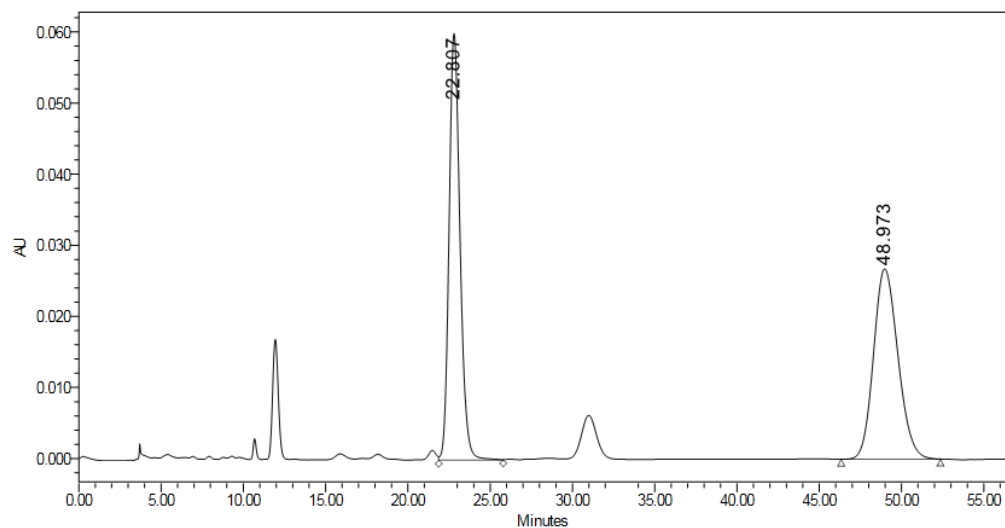

|   | RT<br>(min) | Area<br>(μV*sec) | % Area | Height<br>(μV) | % Height |
|---|-------------|------------------|--------|----------------|----------|
| 1 | 22.807      | 2762480          | 50.03  | 59982          | 69.15    |
| 2 | 48.973      | 2759411          | 49.97  | 26761          | 30.85    |

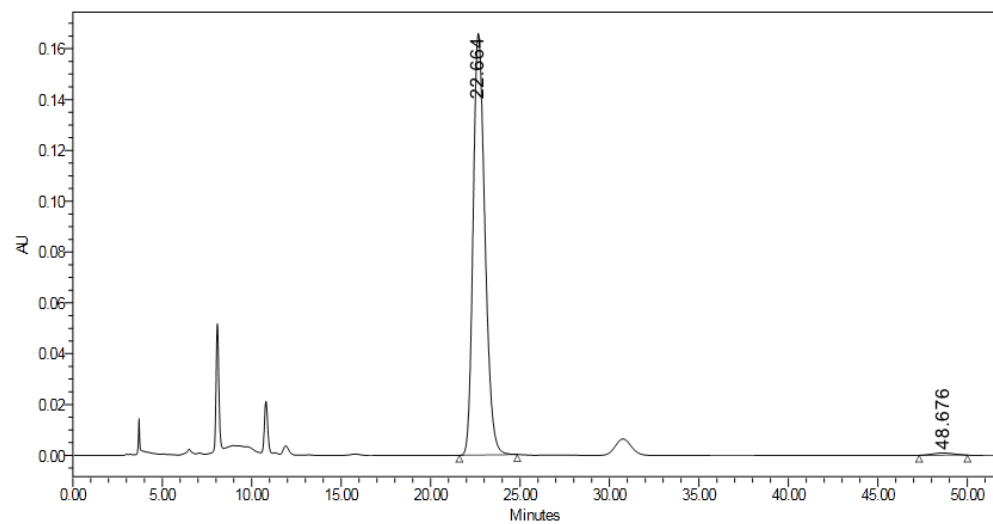

|   | RT<br>(min) | Area<br>(μV*sec) | % Area | Height<br>(μV) | % Height |
|---|-------------|------------------|--------|----------------|----------|
| 1 | 22.664      | 7612679          | 99.08  | 165937         | 99.48    |
| 2 | 48.676      | 71059            | 0.92   | 859            | 0.52     |

Compound **4ja**'s  $^1\text{H}$  NMR Spectra

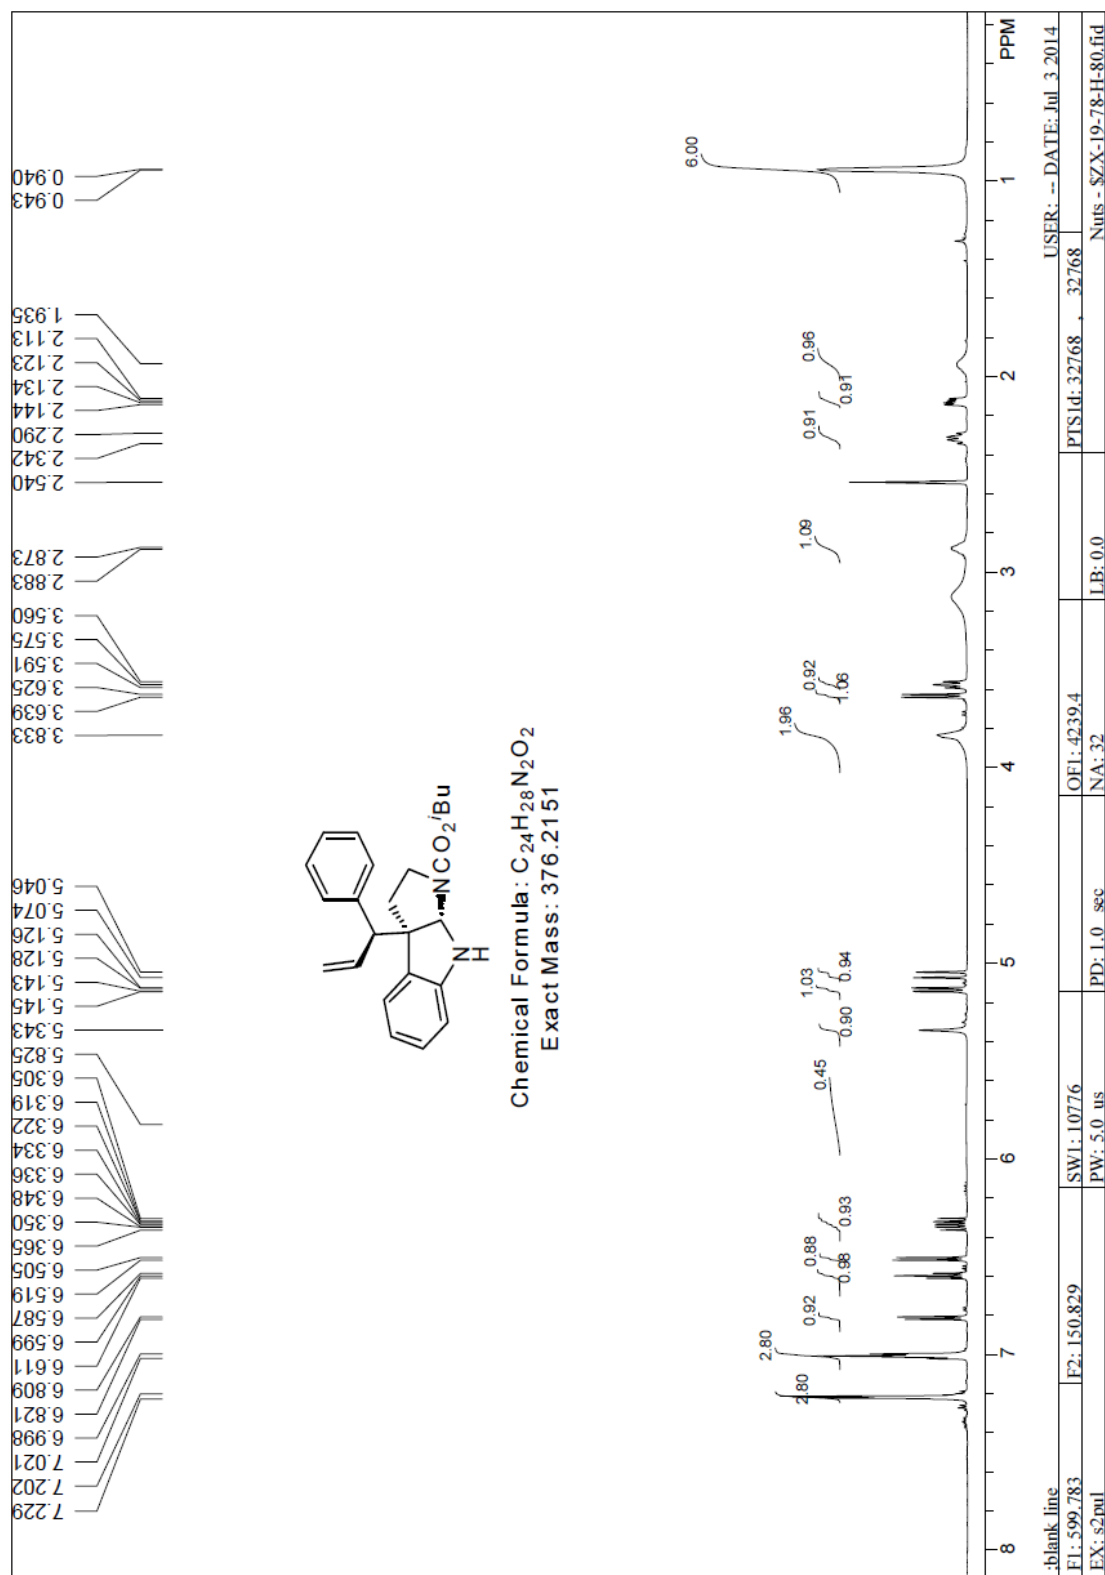

Compound **4ja**'s  $^{13}\text{C}$  NMR Spectra

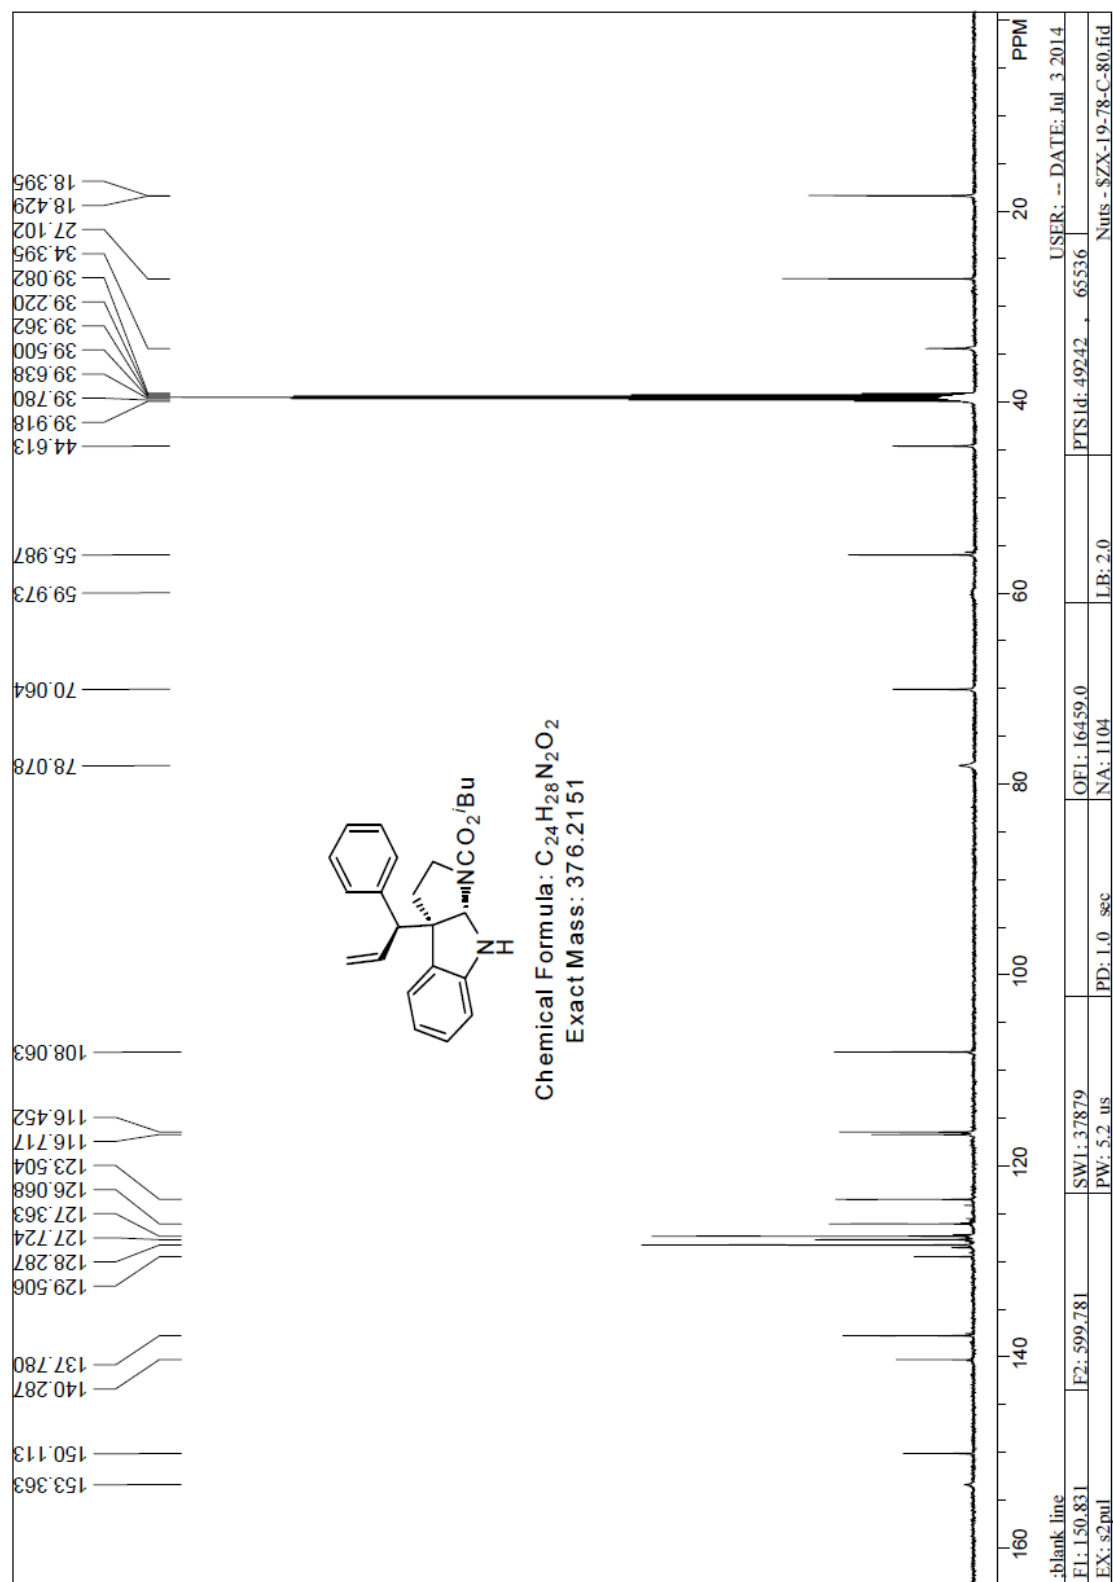

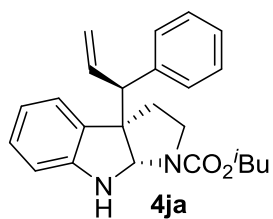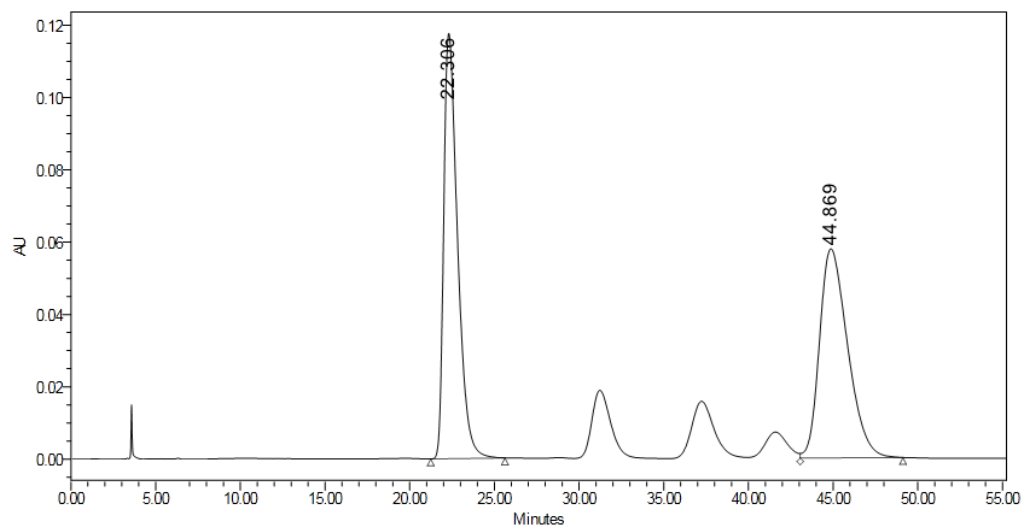

|   | RT<br>(min) | Area<br>( $\mu\text{V}\cdot\text{sec}$ ) | % Area | Height<br>( $\mu\text{V}$ ) | % Height |
|---|-------------|------------------------------------------|--------|-----------------------------|----------|
| 1 | 22.306      | 6659938                                  | 49.97  | 117663                      | 67.04    |
| 2 | 44.869      | 6668700                                  | 50.03  | 57853                       | 32.96    |

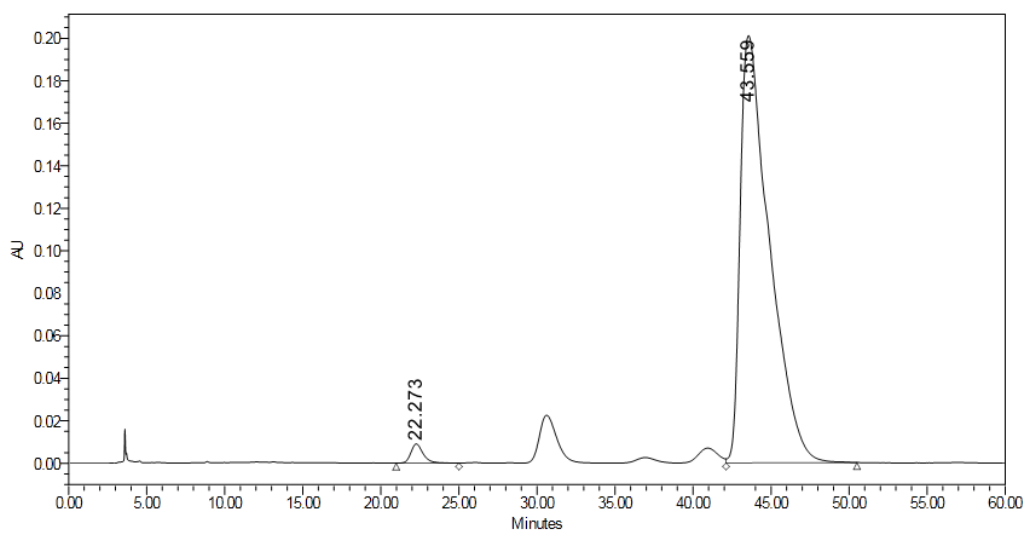

|   | RT<br>(min) | Area<br>( $\mu\text{V}\cdot\text{sec}$ ) | % Area | Height<br>( $\mu\text{V}$ ) | % Height |
|---|-------------|------------------------------------------|--------|-----------------------------|----------|
| 1 | 22.273      | 497125                                   | 1.87   | 9018                        | 4.29     |
| 2 | 43.559      | 26125650                                 | 98.13  | 201056                      | 95.71    |

Compound **4ka**'s  $^1\text{H}$  NMR Spectra

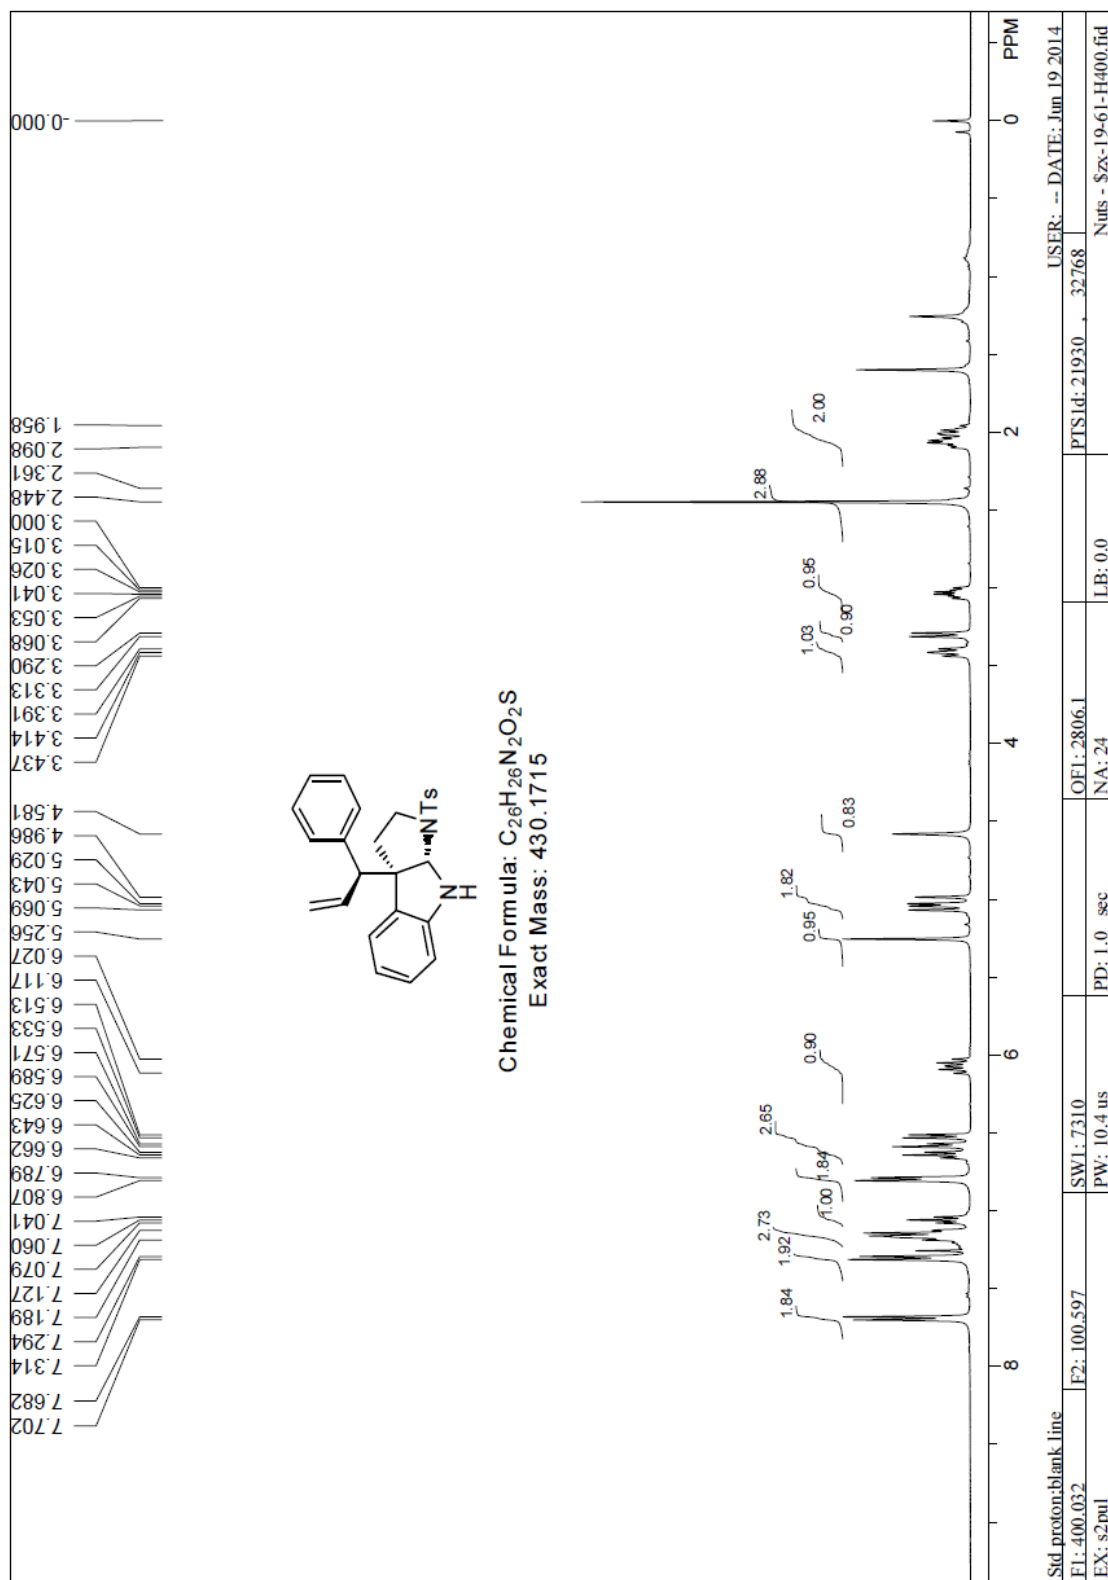

Compound **4ka**'s  $^{13}\text{C}$  NMR Spectra

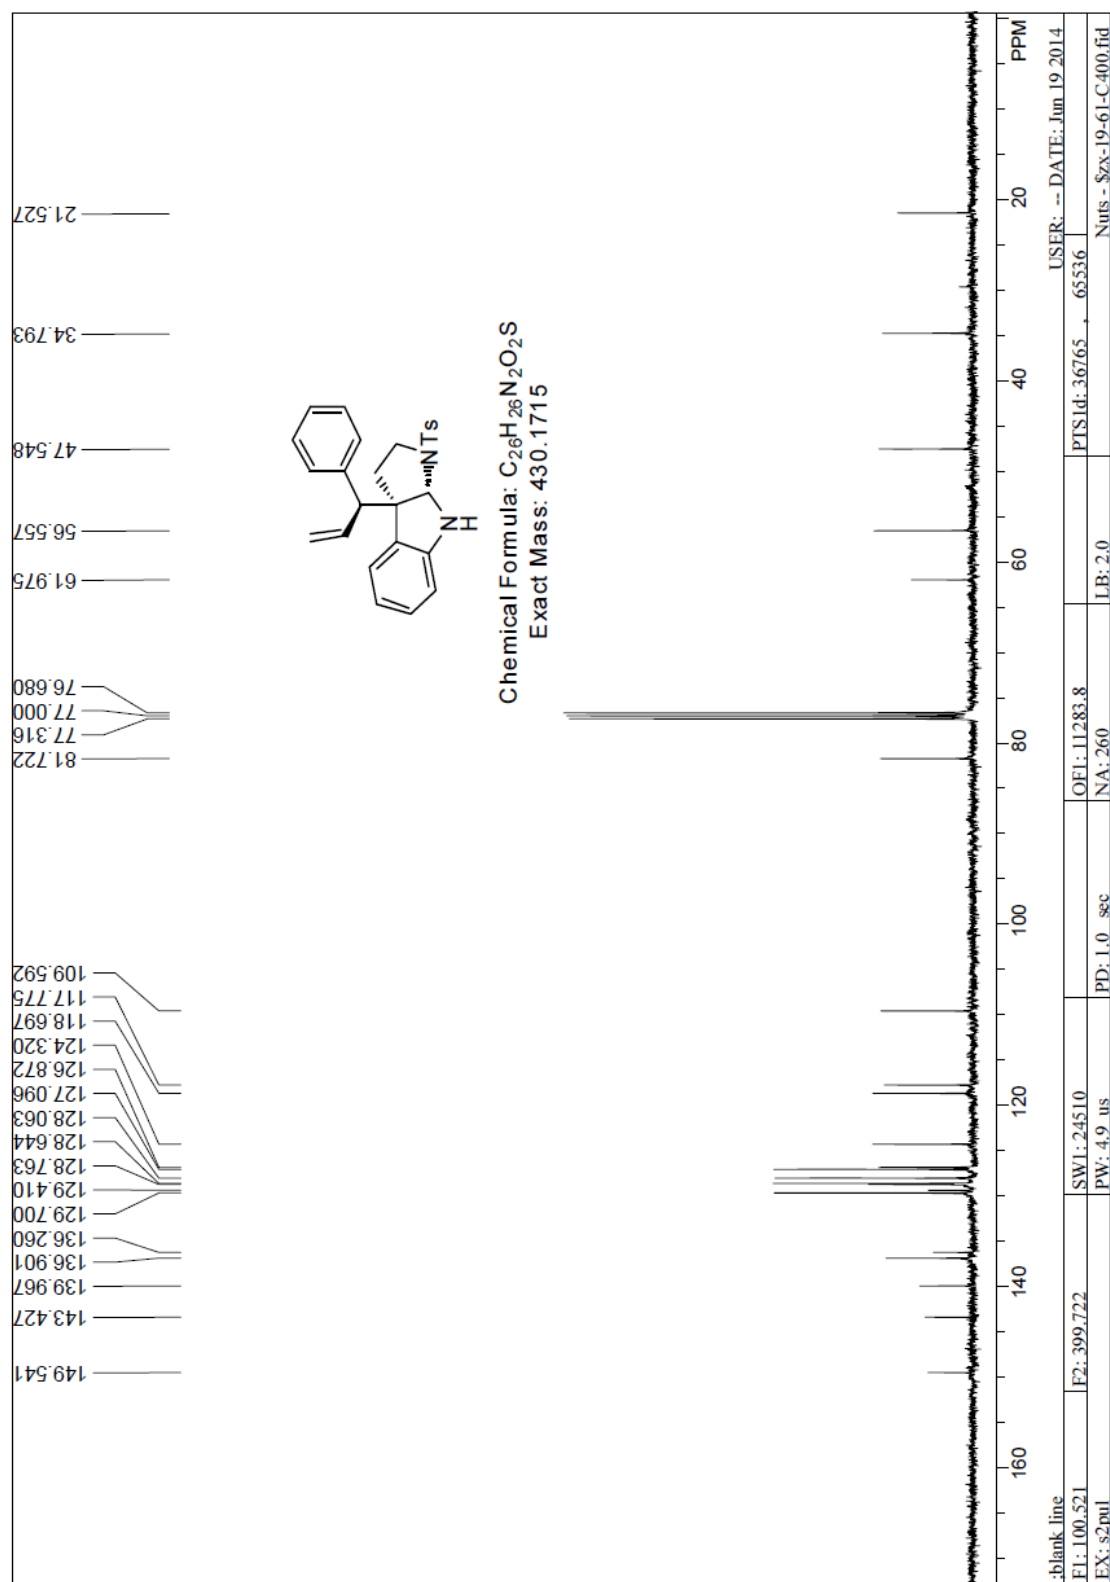

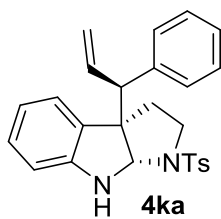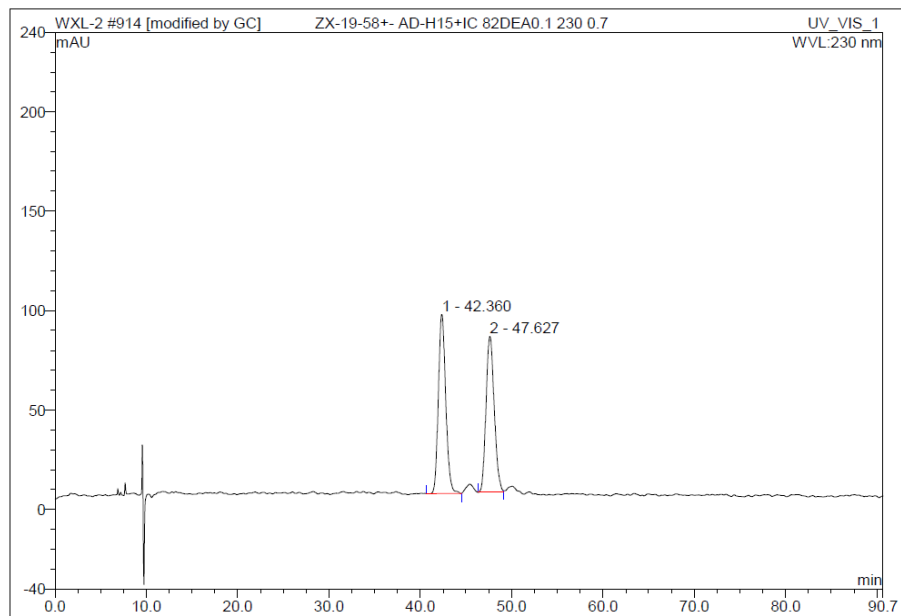

| No.           | Ret.Time<br>min | Peak Name | Height<br>mAU | Area<br>mAU*min | Rel.Area<br>% | Amount | Type |
|---------------|-----------------|-----------|---------------|-----------------|---------------|--------|------|
| 1             | 42.36           | n.a.      | 90.189        | 84.603          | 50.76         | n.a.   | BMB* |
| 2             | 47.63           | n.a.      | 78.491        | 82.064          | 49.24         | n.a.   | BM * |
| <b>Total:</b> |                 |           | 168.680       | 166.668         | 100.00        | 0.000  |      |

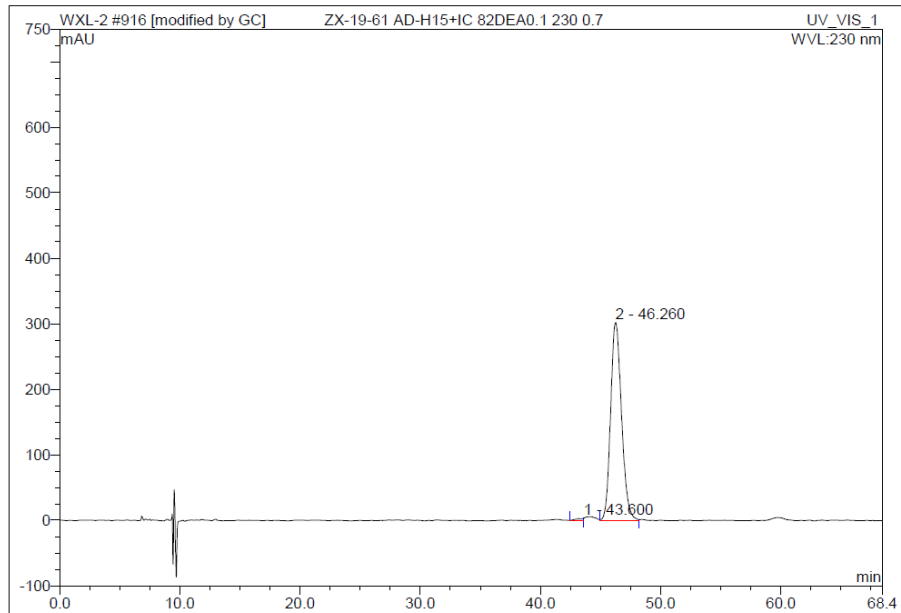

| No.           | Ret.Time<br>min | Peak Name | Height<br>mAU | Area<br>mAU*min | Rel.Area<br>% | Amount | Type |
|---------------|-----------------|-----------|---------------|-----------------|---------------|--------|------|
| 1             | 43.60           | n.a.      | 3.065         | 1.807           | 0.57          | n.a.   | BM * |
| 2             | 46.26           | n.a.      | 302.217       | 317.271         | 99.43         | n.a.   | M *  |
| <b>Total:</b> |                 |           | 305.283       | 319.078         | 100.00        | 0.000  |      |



Compound **4la**'s  $^1\text{H}$  NMR Spectra

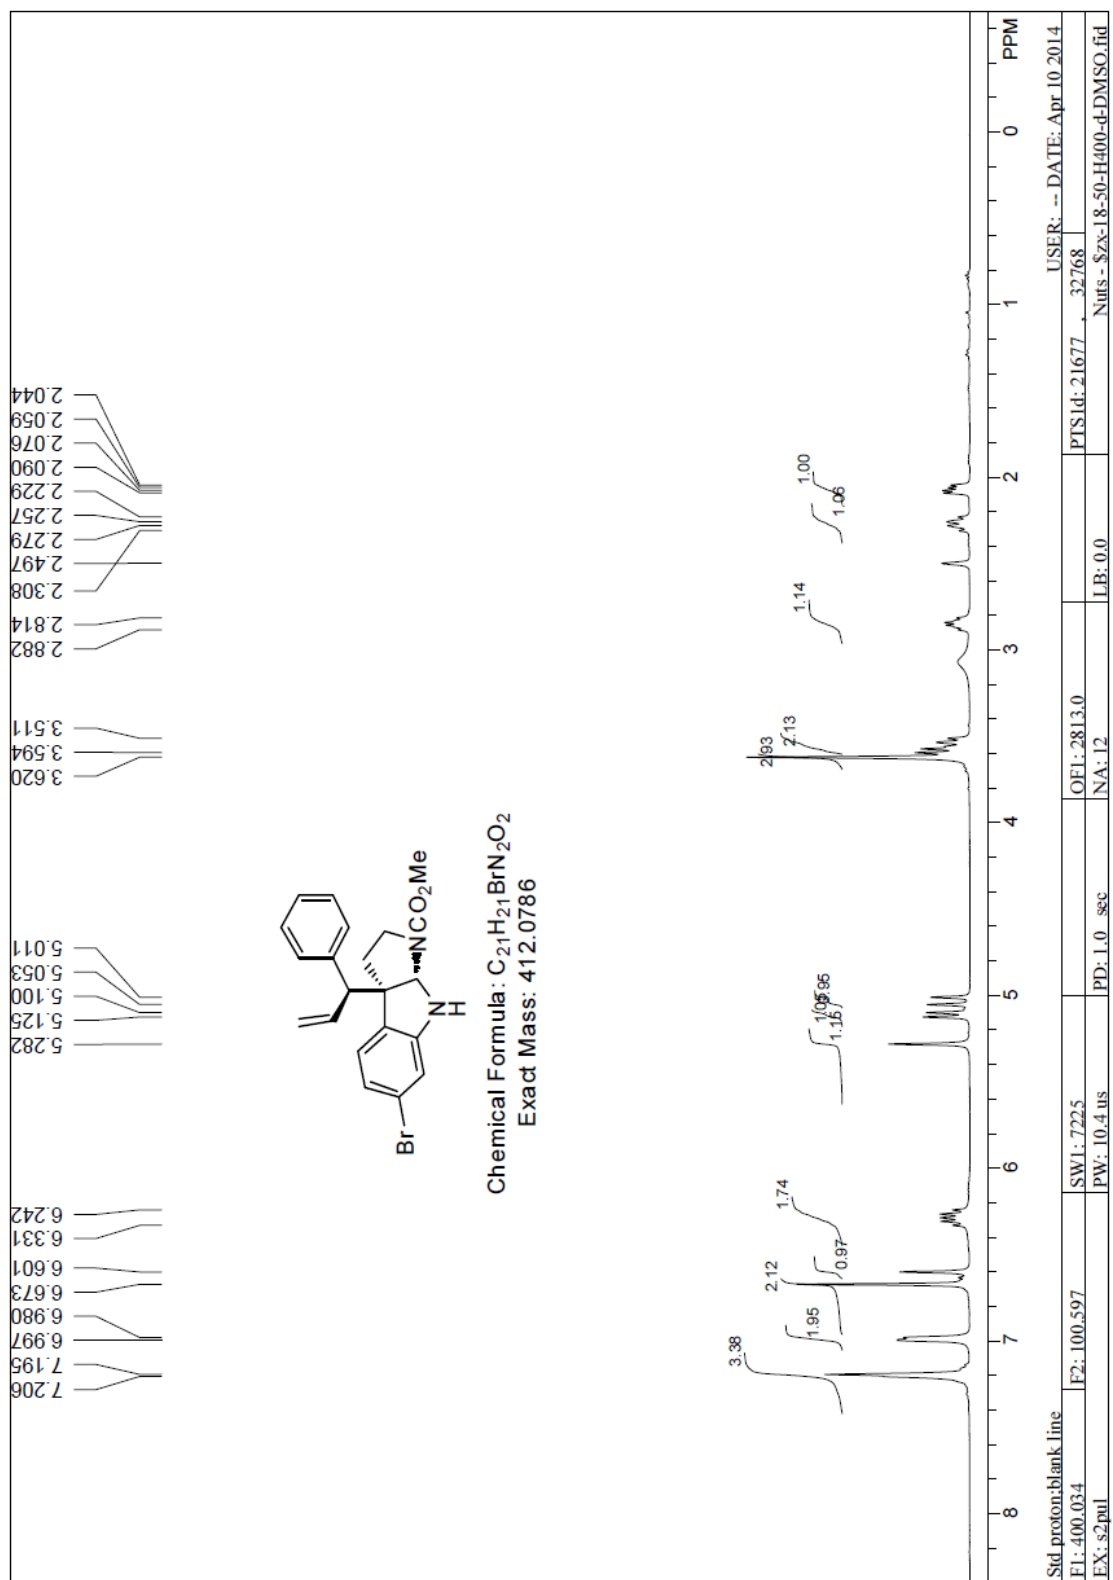

Compound **4la**'s  $^{13}\text{C}$  NMR Spectra

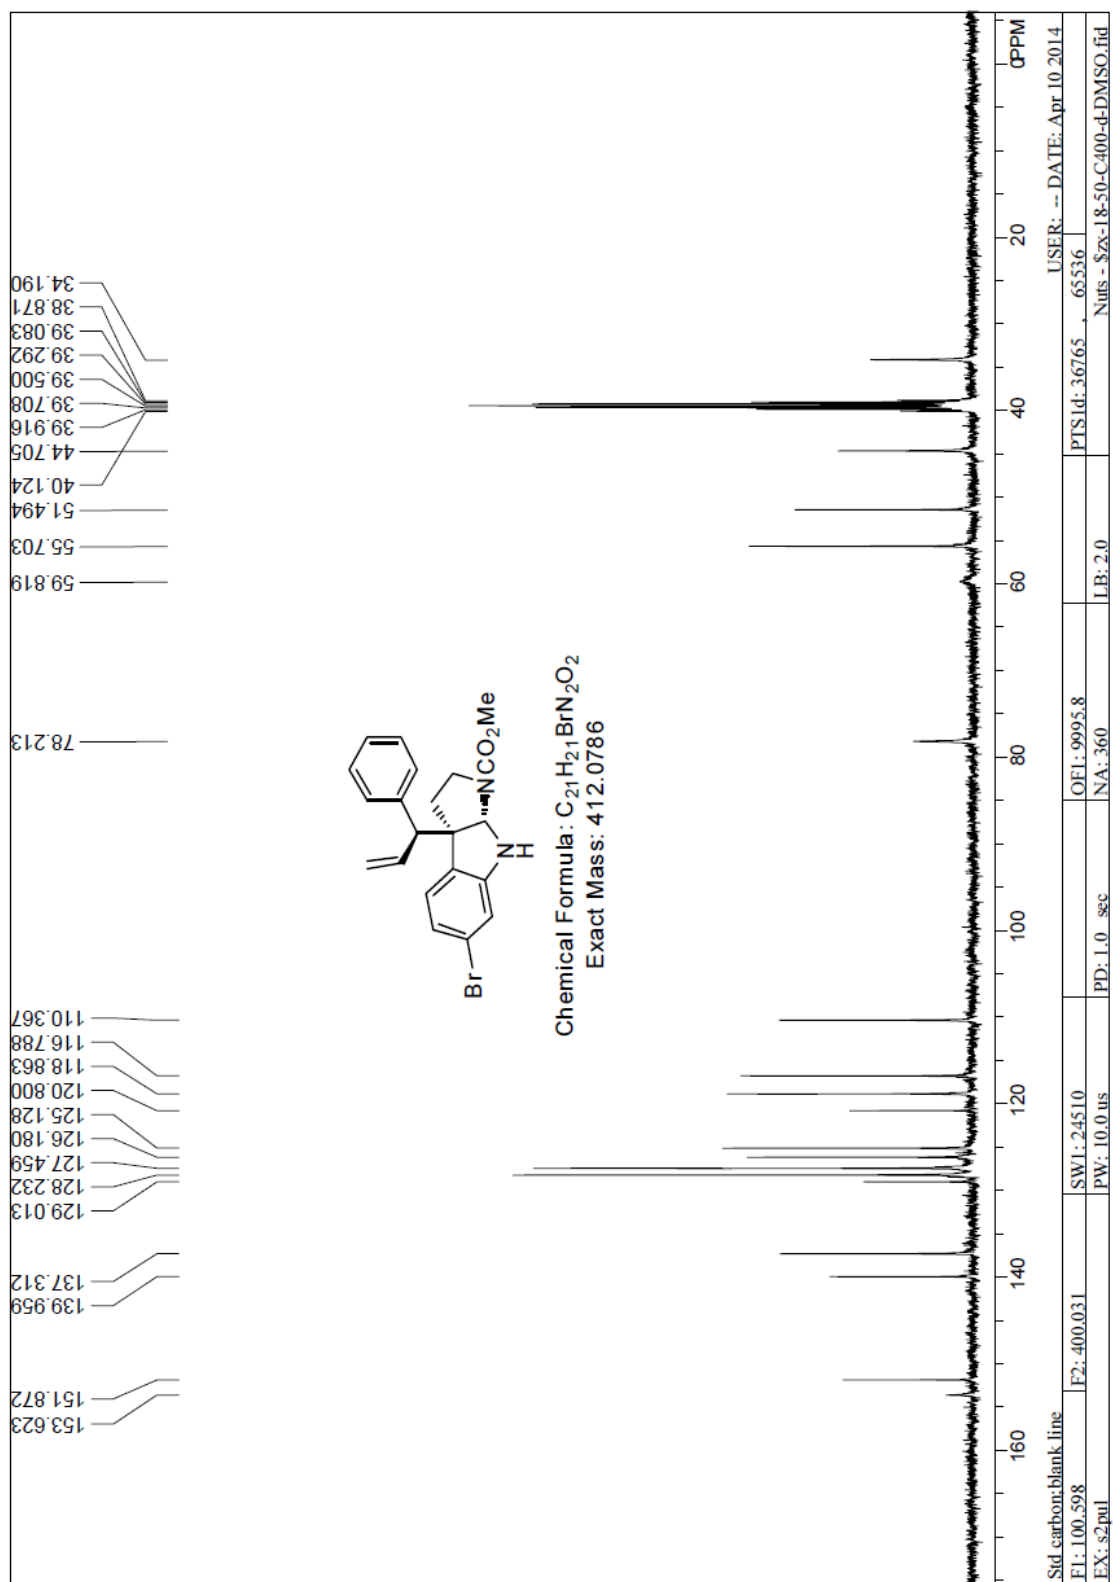

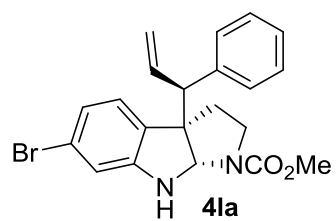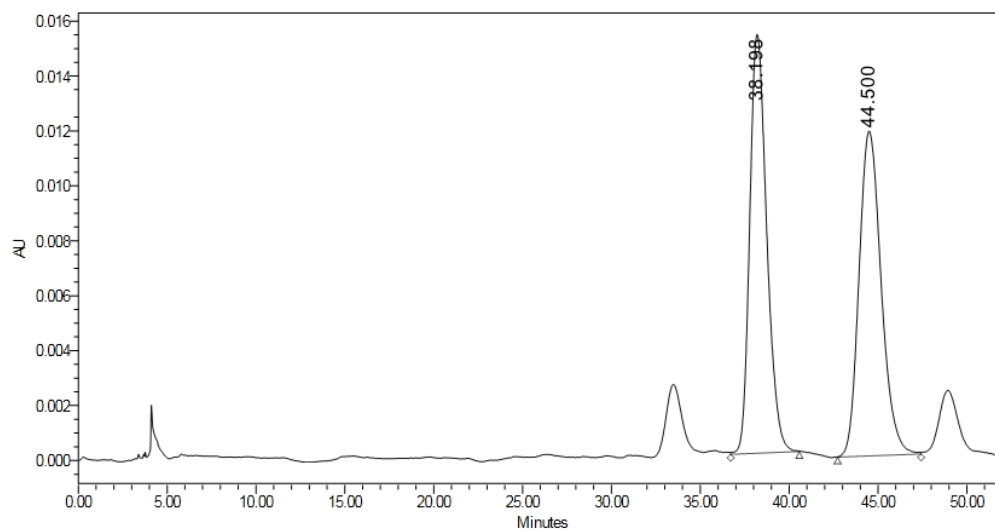

|   | RT<br>(min) | Area<br>( $\mu\text{V}\cdot\text{sec}$ ) | % Area | Height<br>( $\mu\text{V}$ ) | % Height |
|---|-------------|------------------------------------------|--------|-----------------------------|----------|
| 1 | 38.198      | 1013238                                  | 49.73  | 15247                       | 56.32    |
| 2 | 44.500      | 1024309                                  | 50.27  | 11825                       | 43.68    |

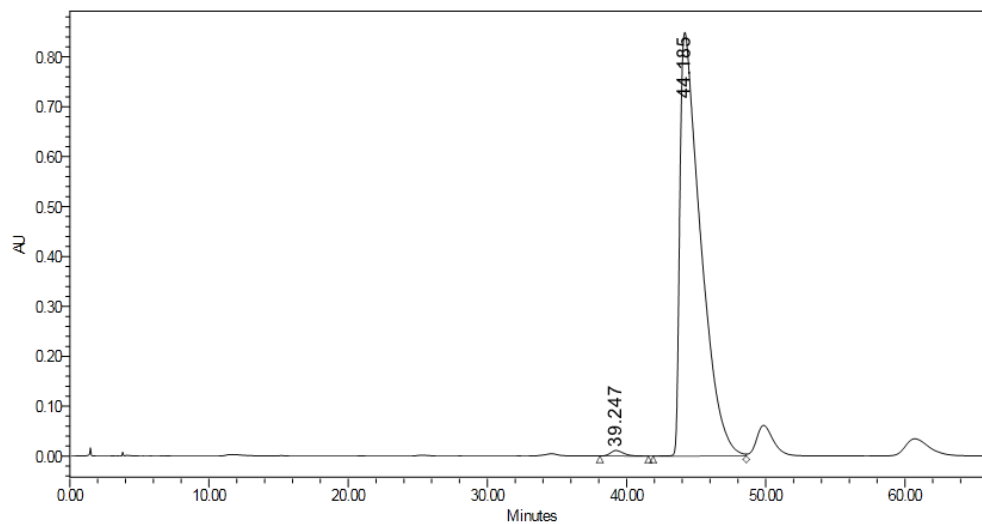

|   | RT<br>(min) | Area<br>( $\mu\text{V}\cdot\text{sec}$ ) | % Area | Height<br>( $\mu\text{V}$ ) | % Height |
|---|-------------|------------------------------------------|--------|-----------------------------|----------|
| 1 | 39.247      | 704846                                   | 0.80   | 10965                       | 1.28     |
| 2 | 44.185      | 87788145                                 | 99.20  | 848839                      | 98.72    |

Compound **4ma**'s  $^1\text{H}$  NMR Spectra

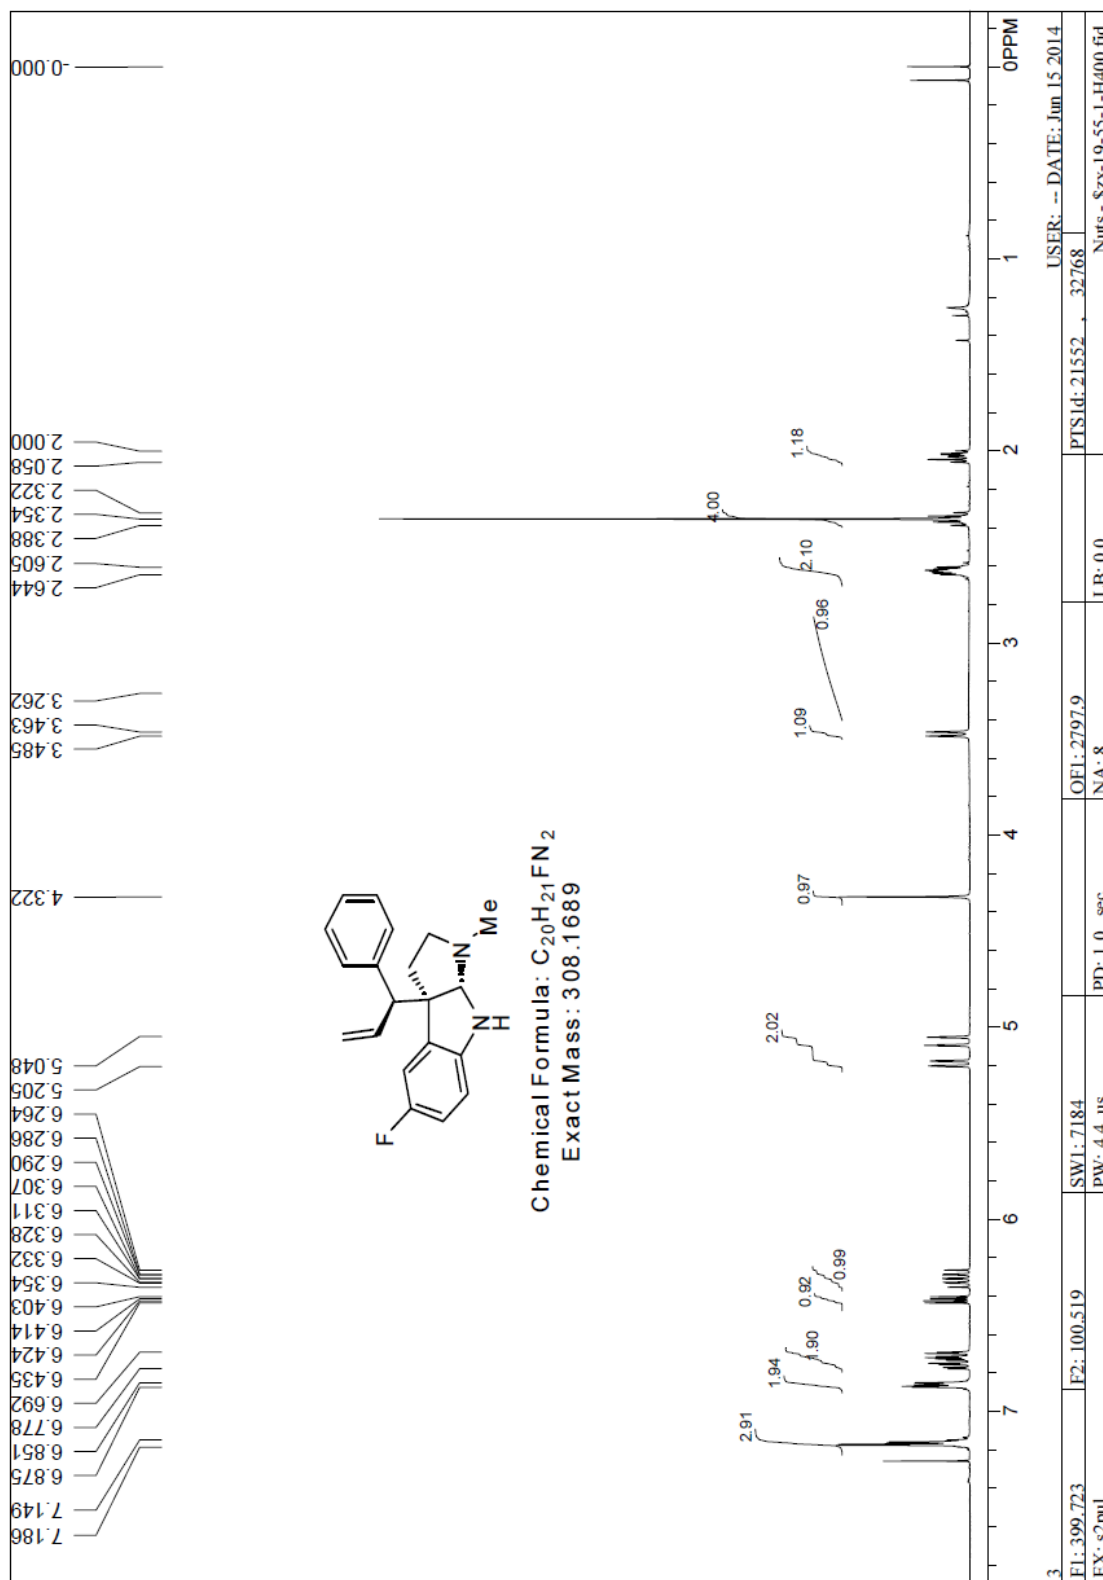

Compound **4ma**'s  $^{13}\text{C}$  NMR Spectra

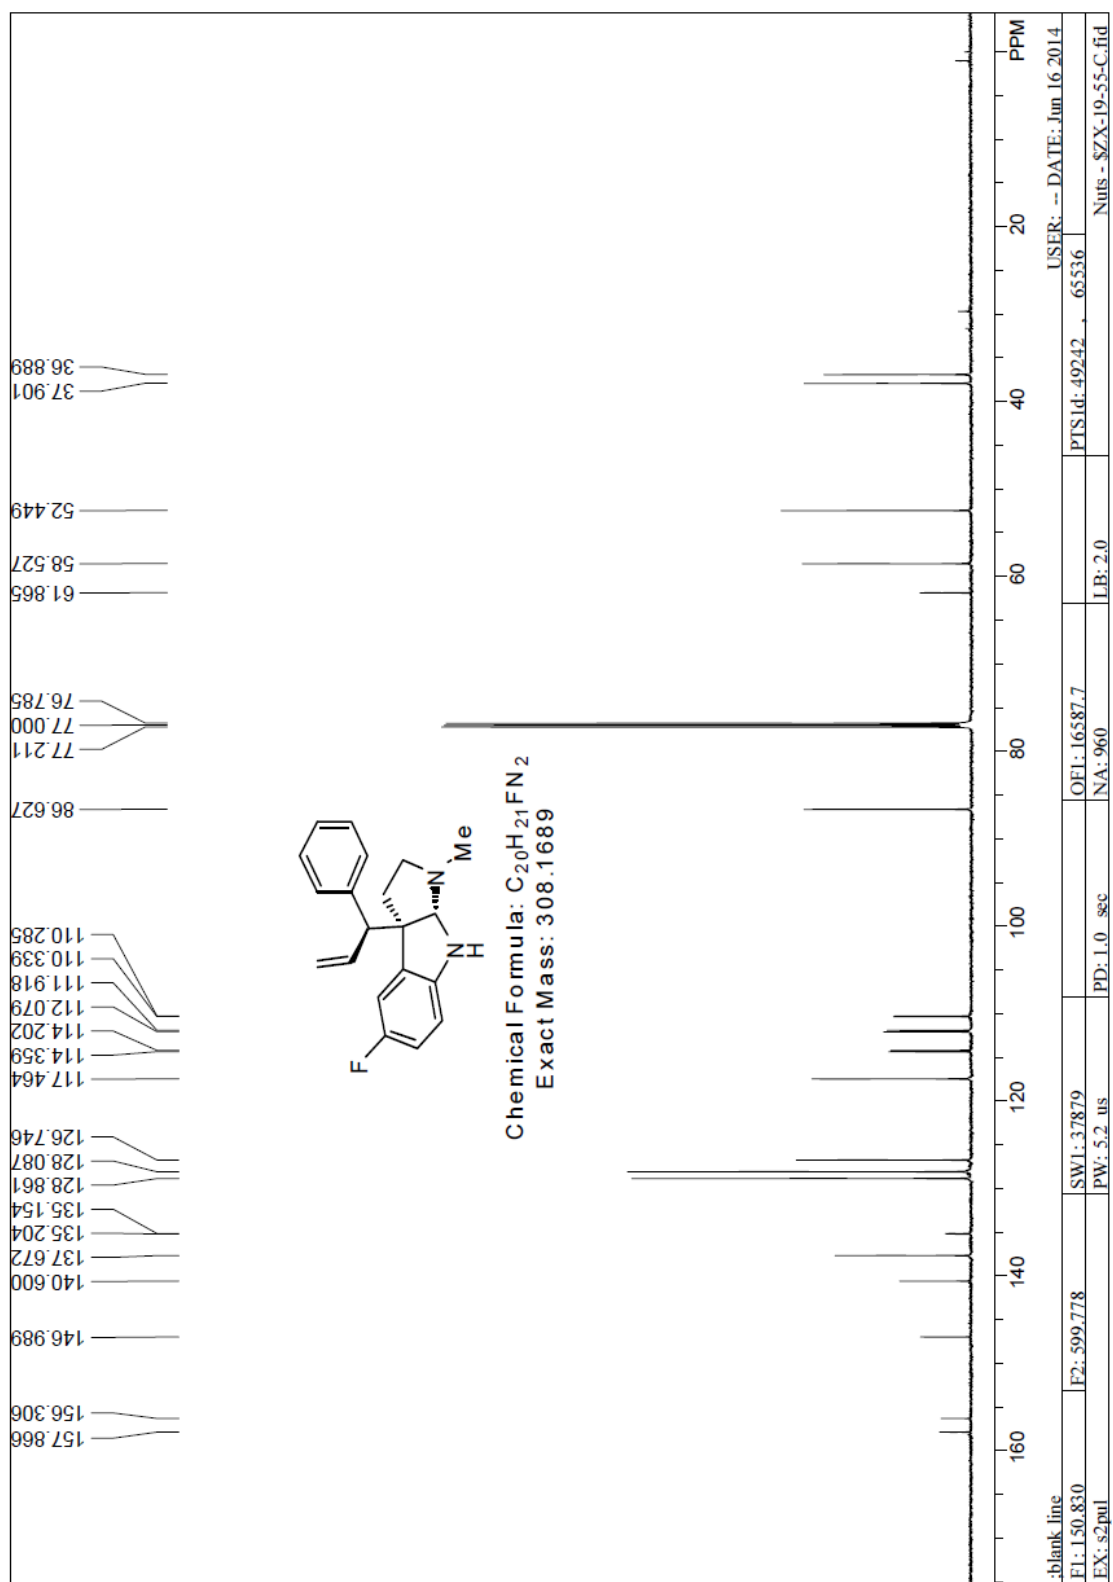

Compound **4ma**'s  $^{19}\text{F}$  NMR Spectra

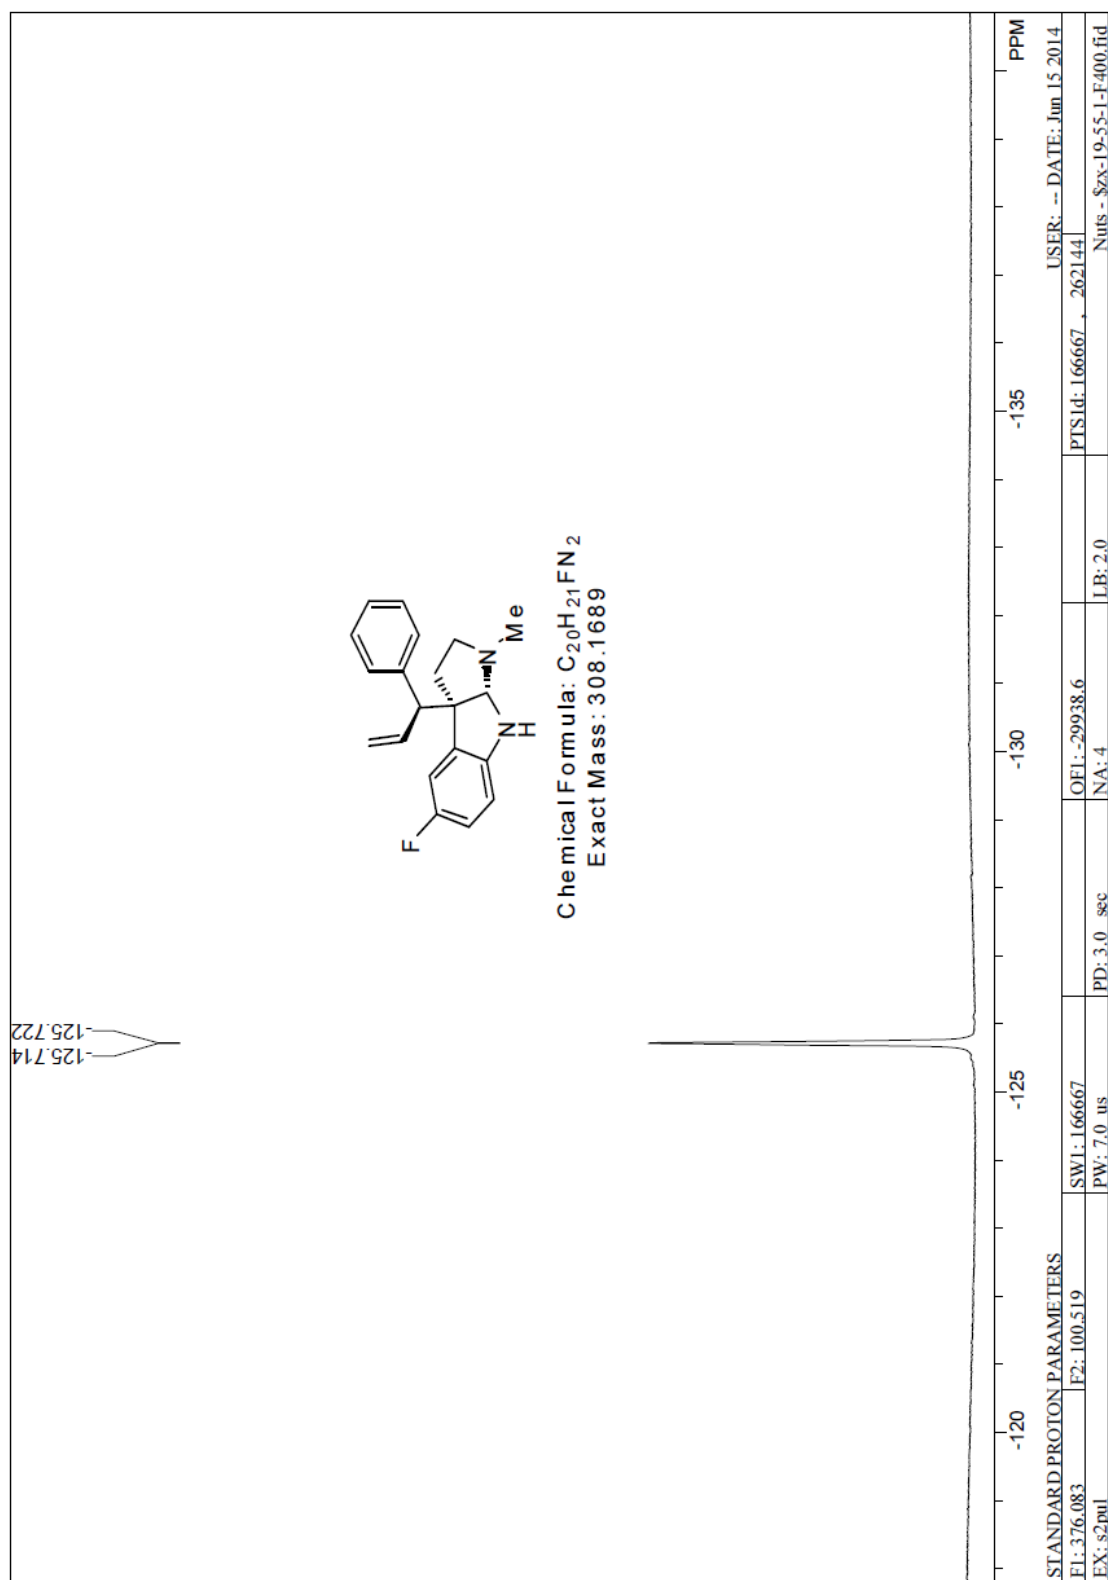

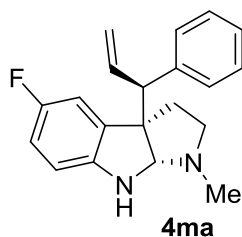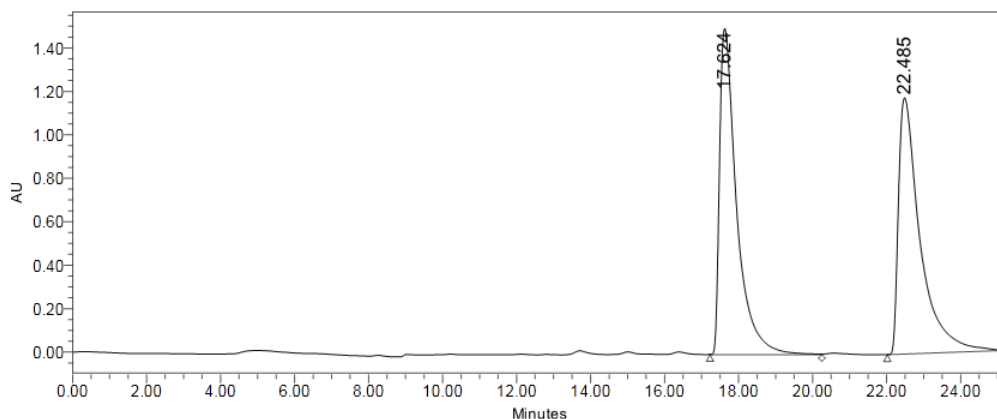

**Peak Name:**

|           | Injection | RT     | Area     | % Area | Height  |
|-----------|-----------|--------|----------|--------|---------|
| 1         | 1         | 22.485 | 47838783 | 49.85  | 1179045 |
| 2         | 1         | 17.624 | 48121729 | 50.15  | 1501299 |
| Mean      |           | 20.055 |          |        |         |
| Std. Dev. |           | 3.438  |          |        |         |
| % RSD     |           | 17.14  |          |        |         |

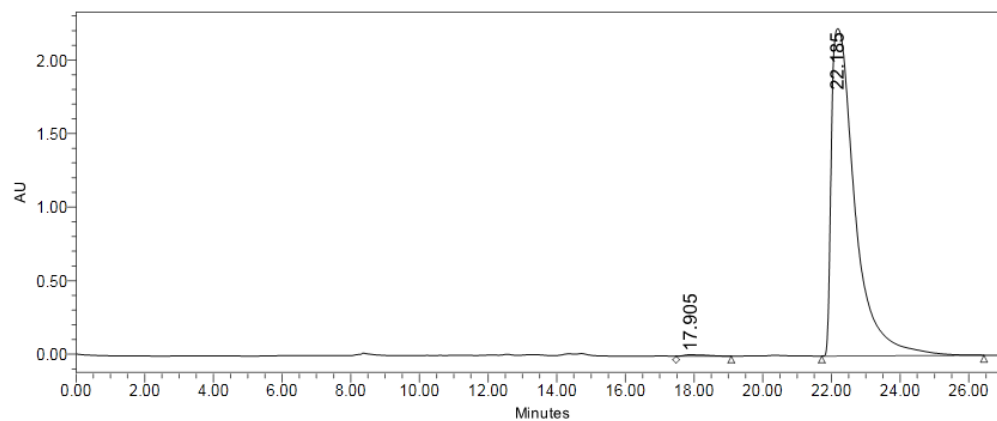

**Peak Name:**

|           | Injection | RT     | Area      | % Area | Height  |
|-----------|-----------|--------|-----------|--------|---------|
| 1         | 1         | 22.185 | 106358335 | 99.58  | 2225673 |
| 2         | 1         | 17.905 | 449010    | 0.42   | 10887   |
| Mean      |           | 20.045 |           |        |         |
| Std. Dev. |           | 3.026  |           |        |         |
| % RSD     |           | 15.10  |           |        |         |

Compound **4na**'s  $^1\text{H}$  NMR Spectra

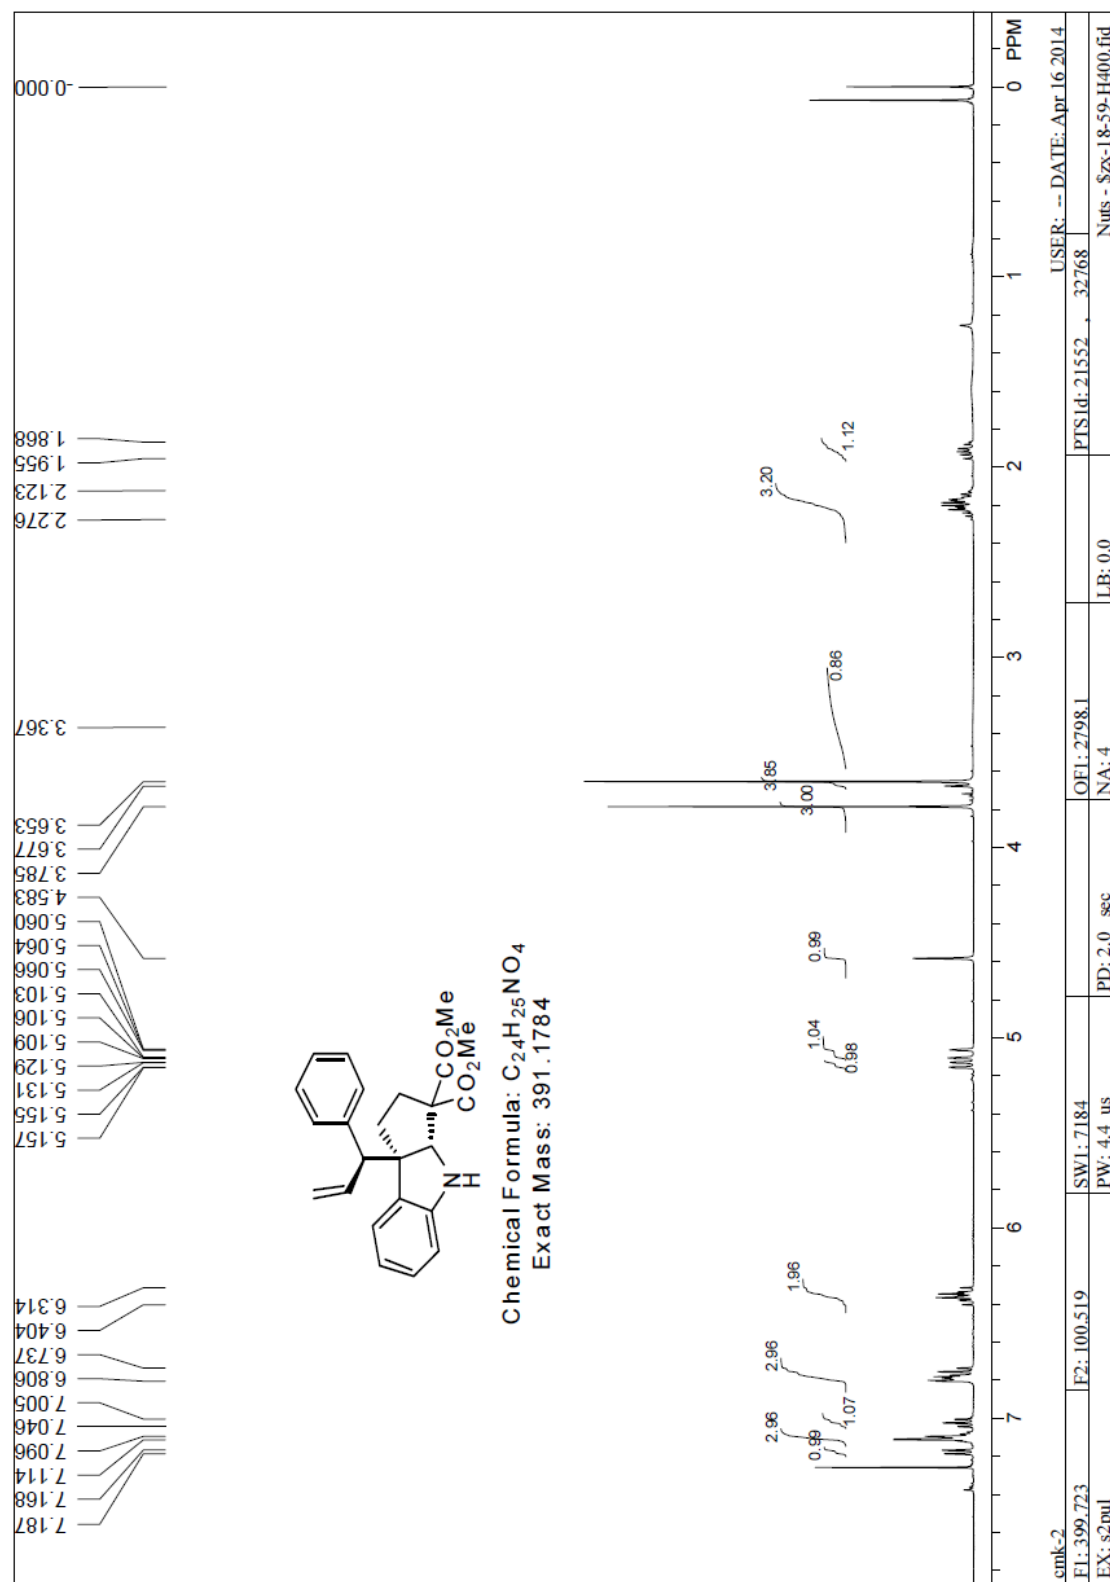



Compound **4na**'s  $^{13}\text{C}$  NMR Spectra

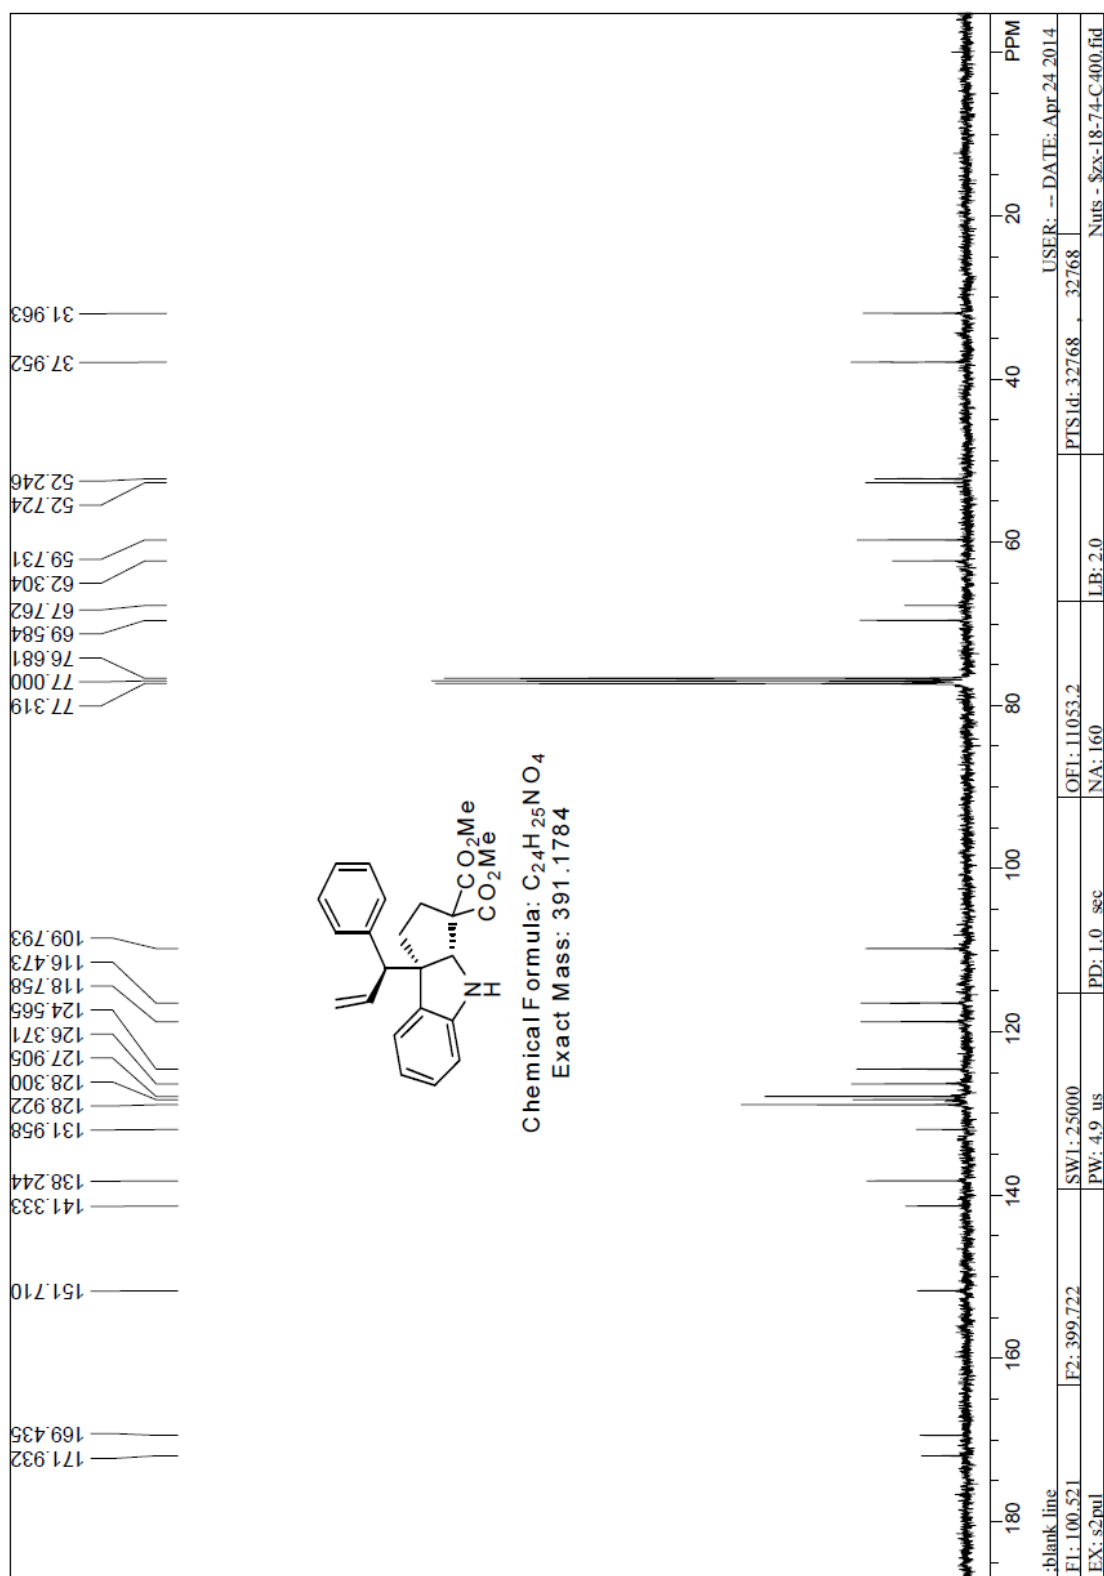

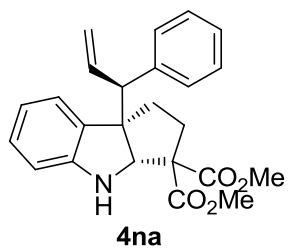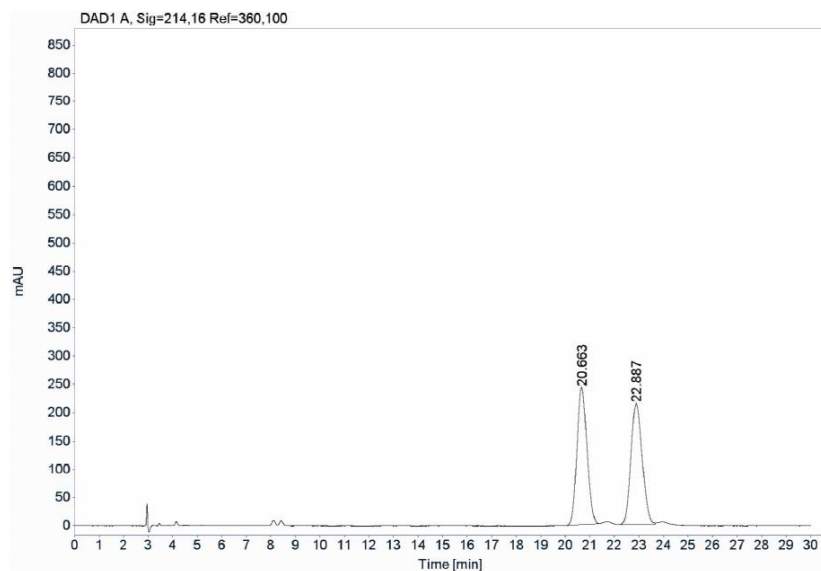

Signal: DAD1 A, Sig=214,16 Ref=360,100

| RT [min] | Type | Width [min] | Area       | Height   | Area%   |
|----------|------|-------------|------------|----------|---------|
| 20.663   | BB   | 0.4270      | 6924.3062  | 242.5693 | 49.9690 |
| 22.887   | BV   | 0.4585      | 6932.8911  | 214.2695 | 50.0310 |
|          | Sum  |             | 13857.1973 |          |         |

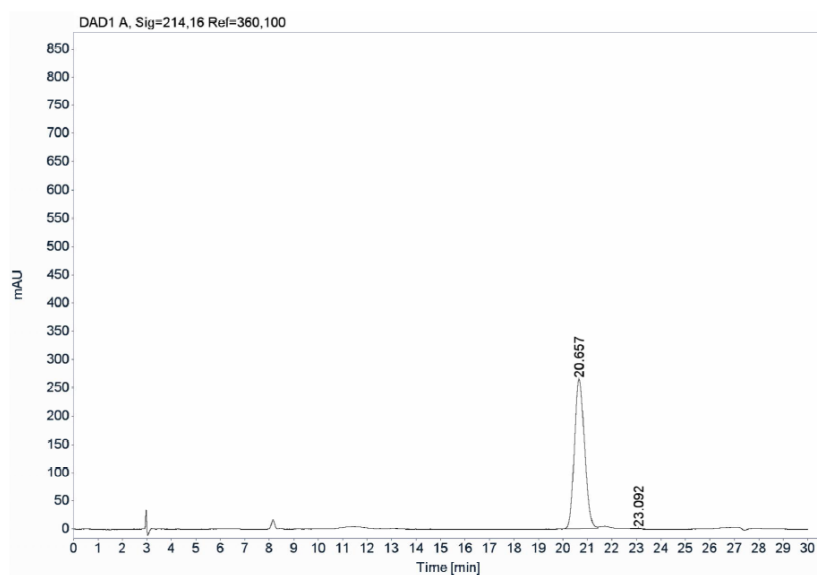

Signal: DAD1 A, Sig=214,16 Ref=360,100

| RT [min] | Type | Width [min] | Area      | Height   | Area%   |
|----------|------|-------------|-----------|----------|---------|
| 20.657   | BV   | 0.4441      | 7656.1157 | 264.9999 | 99.5629 |
| 23.092   | MM R | 0.5352      | 33.6144   | 1.0467   | 0.4371  |
|          | Sum  |             | 7689.7302 |          |         |

Compound **40a**'s  $^1\text{H}$  NMR Spectra

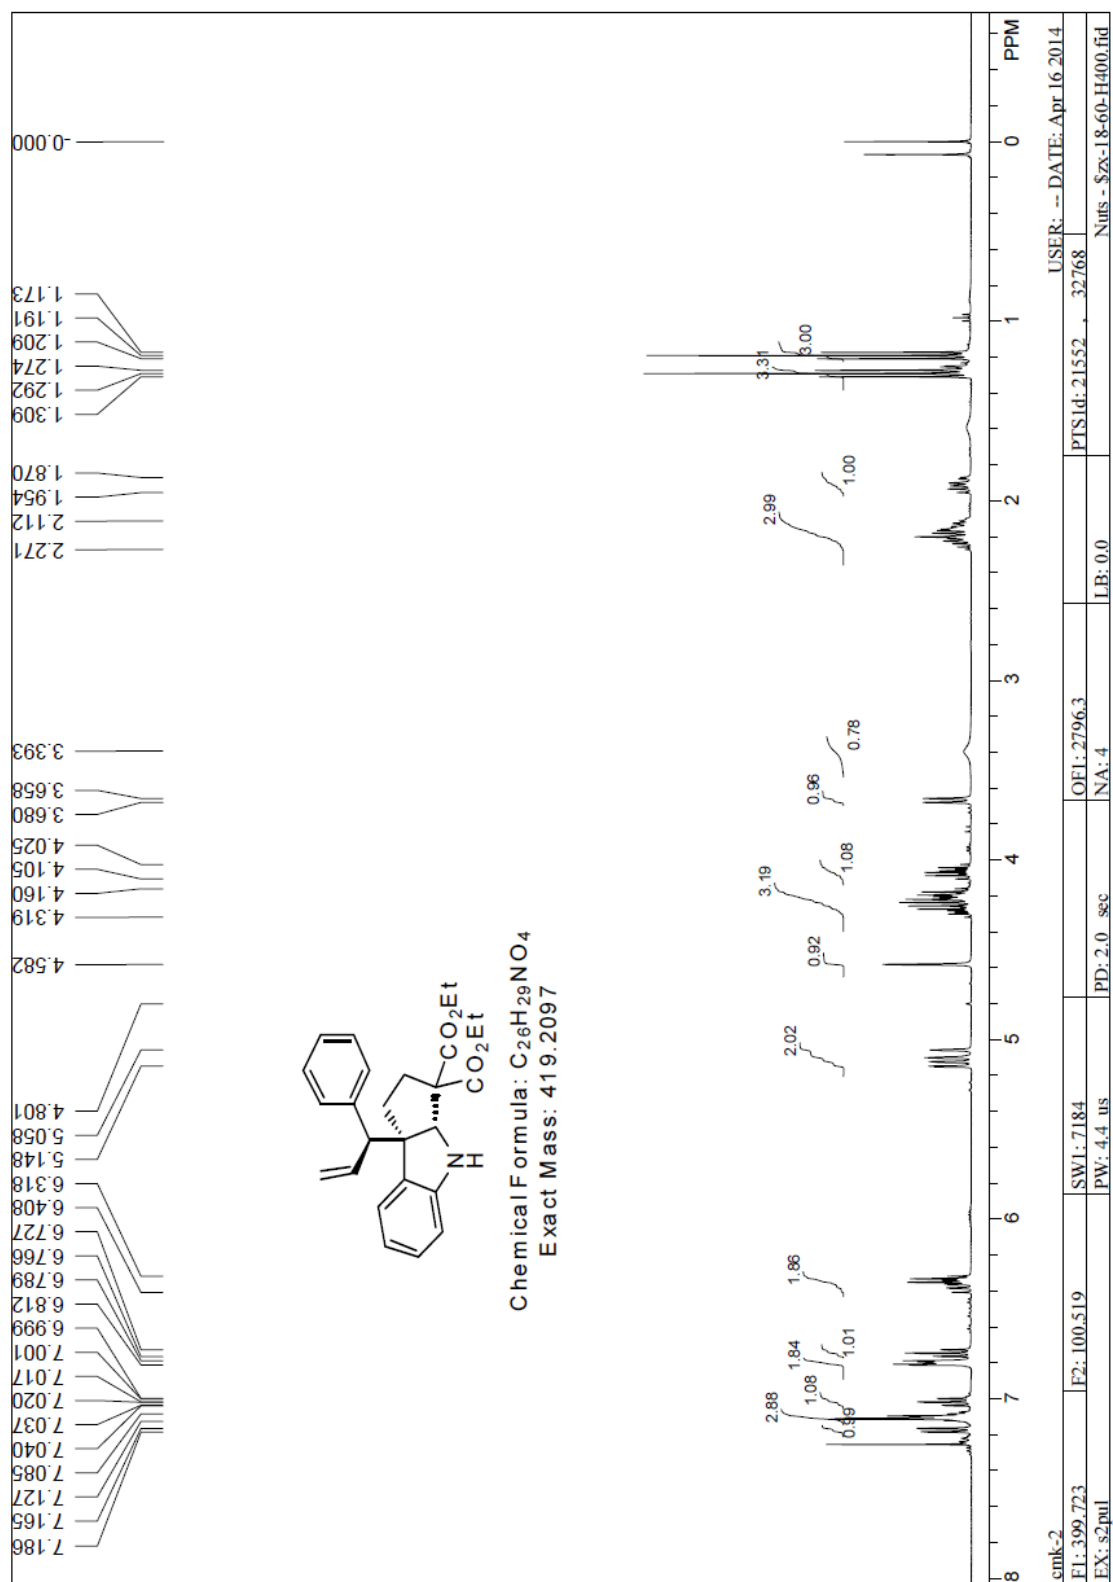

Compound **4oa**'s  $^{13}\text{C}$  NMR Spectra

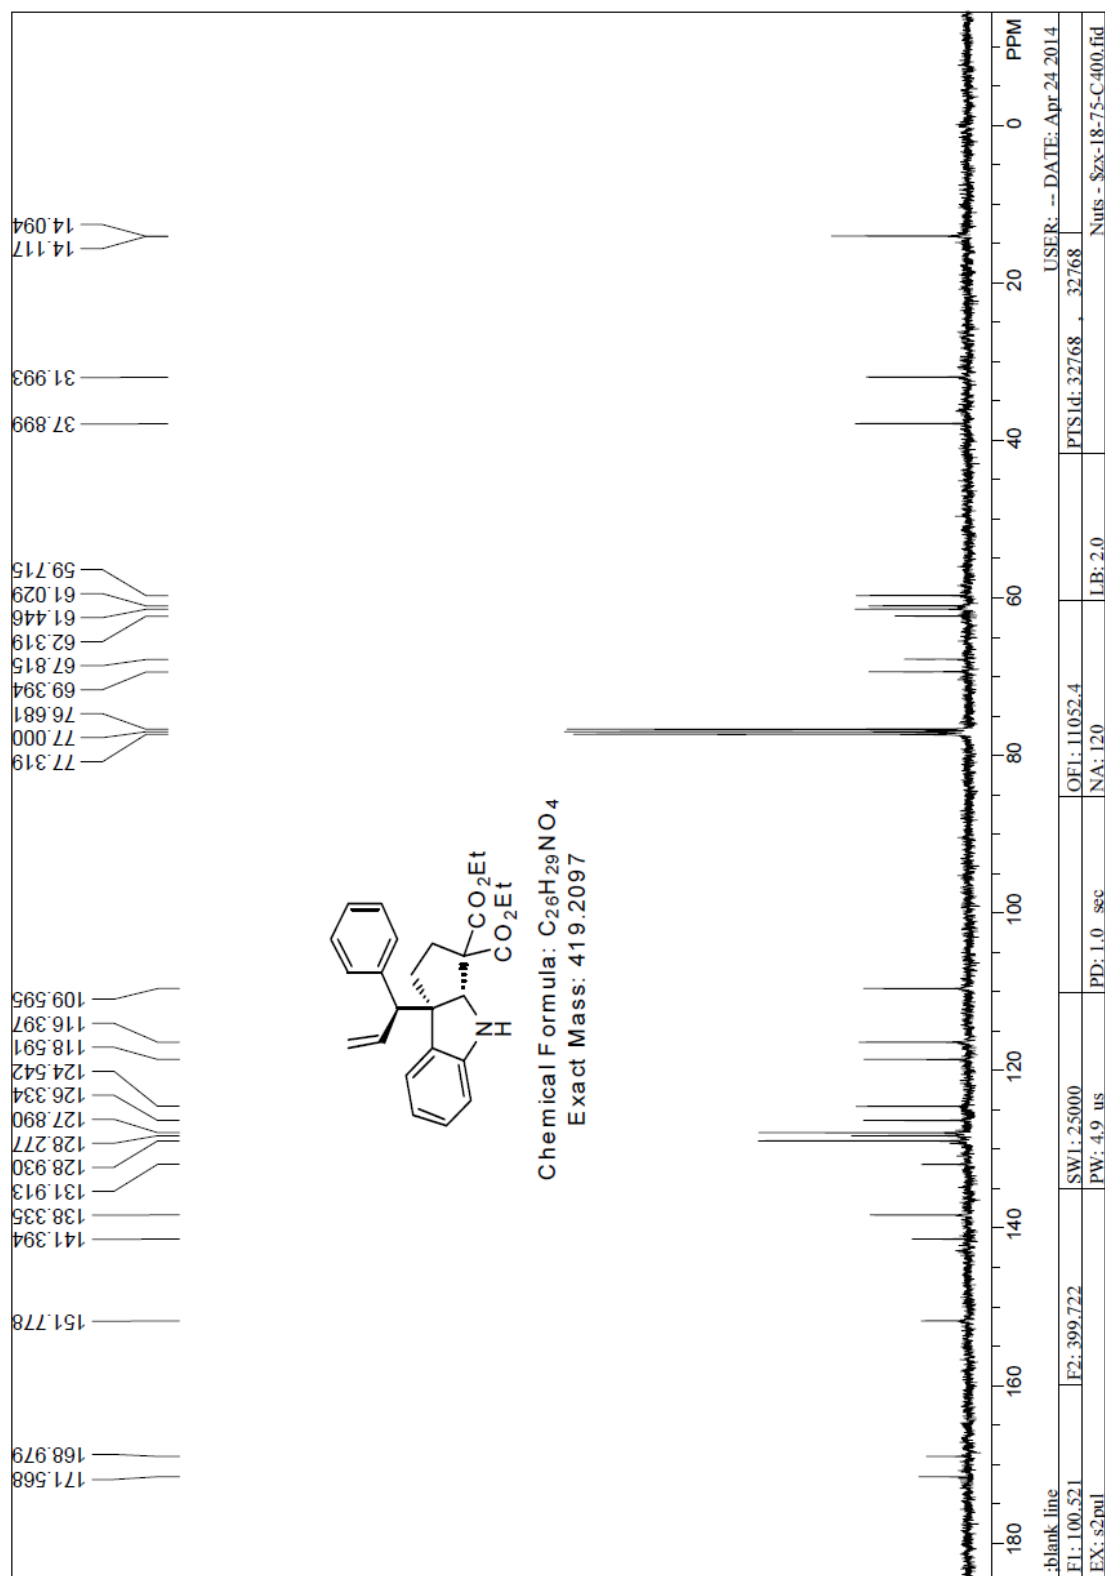

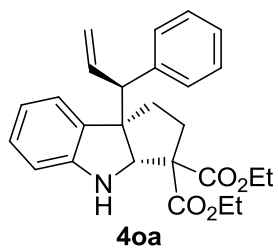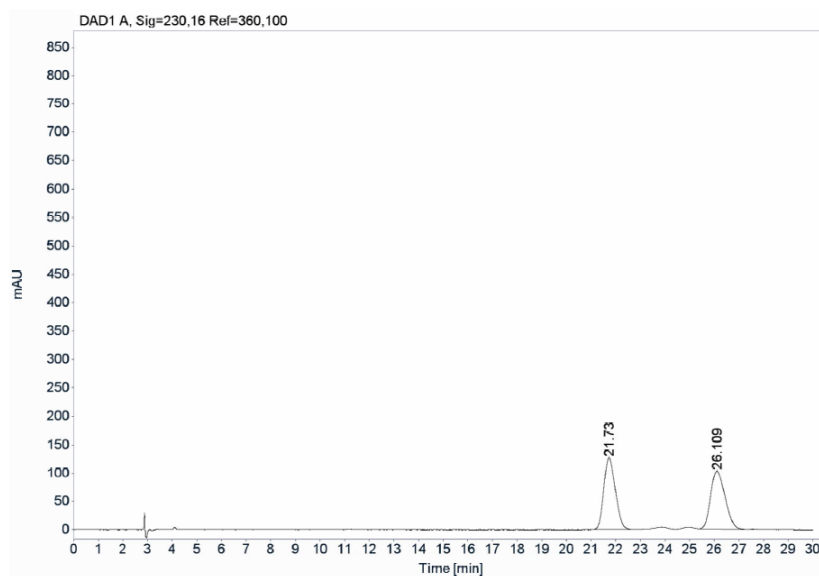

Signal: DAD1 A, Sig=230,16 Ref=360,100

| RT [min] | Type | Width [min] | Area      | Height   | Area%   |
|----------|------|-------------|-----------|----------|---------|
| 21.730   | BB   | 0.4728      | 4132.1968 | 127.2657 | 49.8984 |
| 26.109   | BB   | 0.5366      | 4149.0244 | 102.8496 | 50.1016 |
|          | Sum  |             | 8281.2212 |          |         |

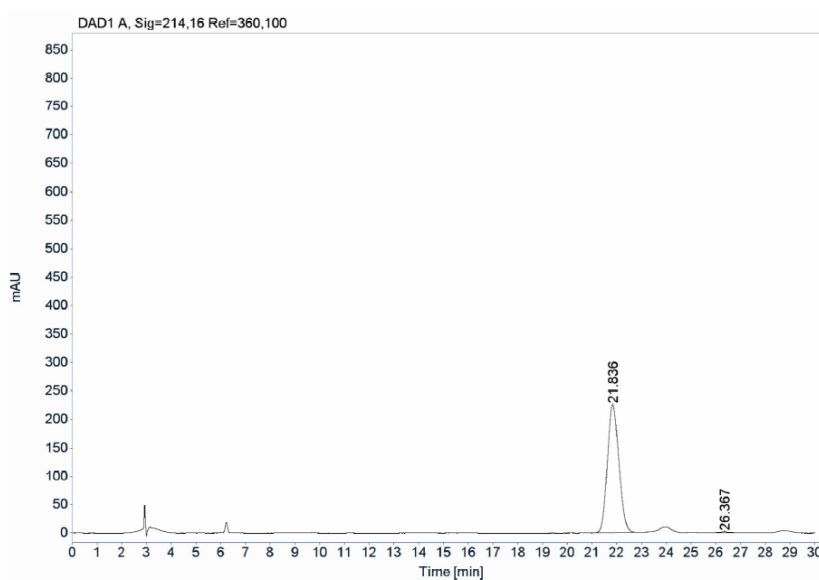

Signal: DAD1 A, Sig=214,16 Ref=360,100

| RT [min] | Type | Width [min] | Area      | Height   | Area%   |
|----------|------|-------------|-----------|----------|---------|
| 21.836   | VB   | 0.4733      | 7285.8862 | 225.2725 | 99.0480 |
| 26.367   | MM R | 0.6248      | 70.0285   | 1.8679   | 0.9520  |
|          | Sum  |             | 7355.9147 |          |         |

Compound **4pa**'s  $^1\text{H}$  NMR Spectra

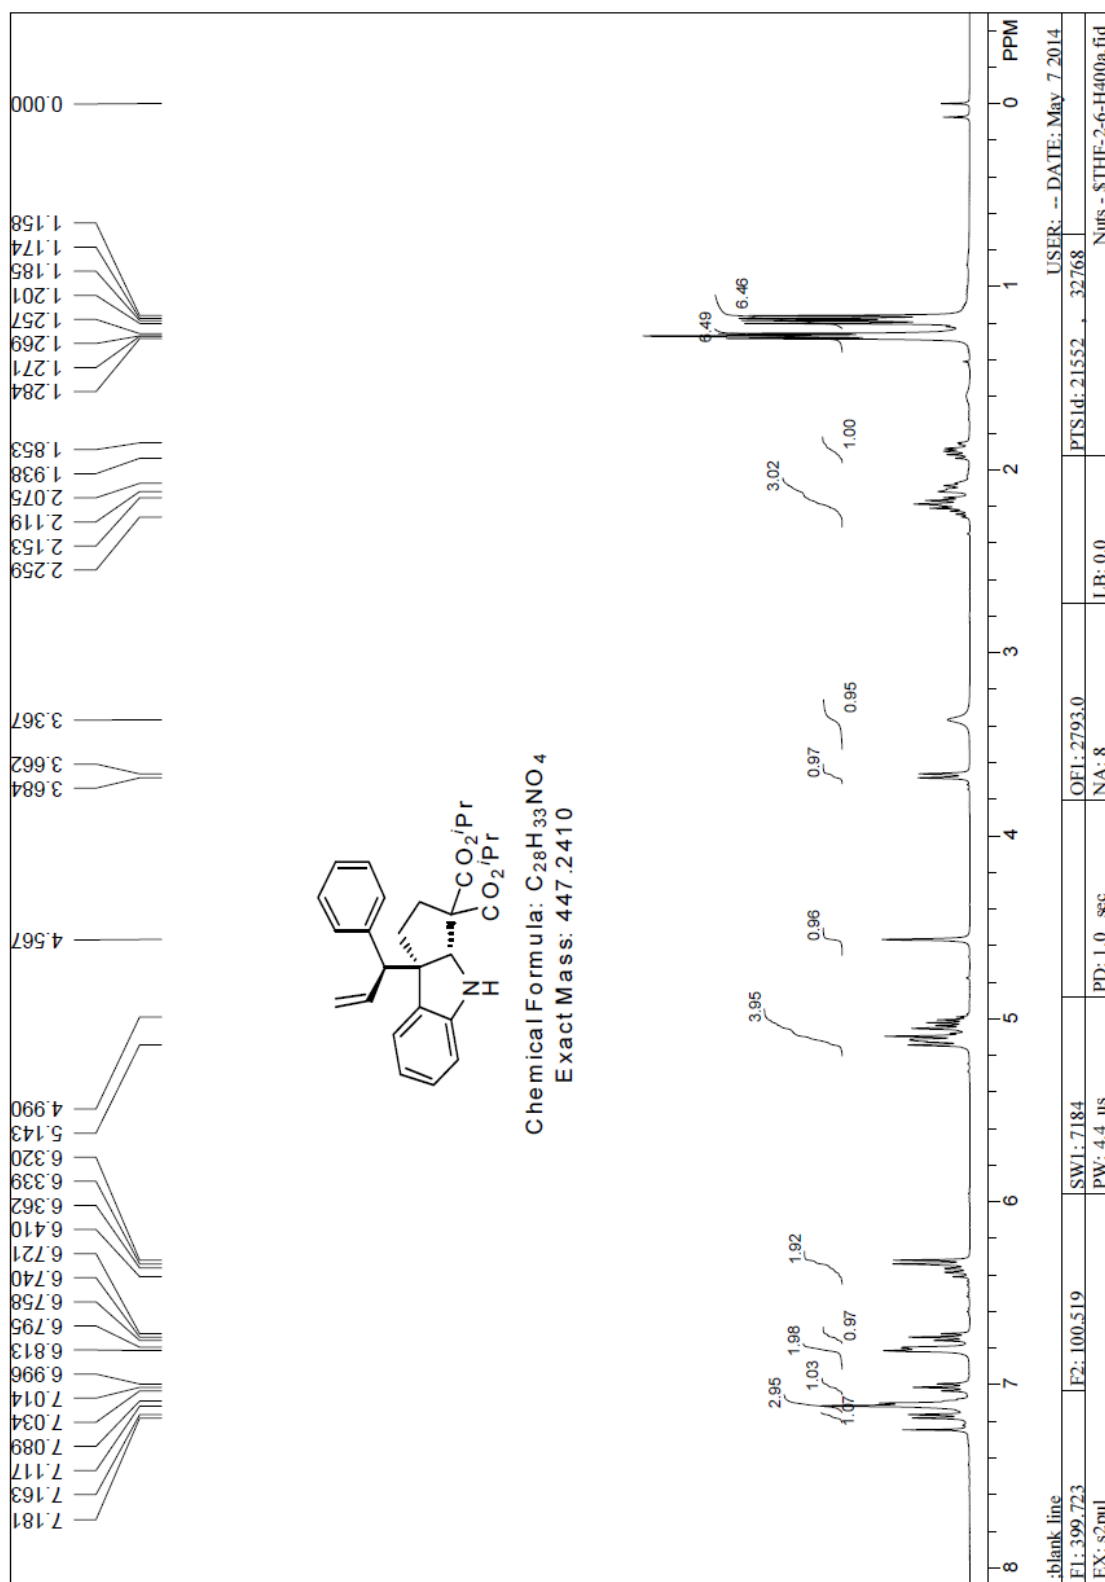

Compound **4pa**'s  $^{13}\text{C}$  NMR Spectra

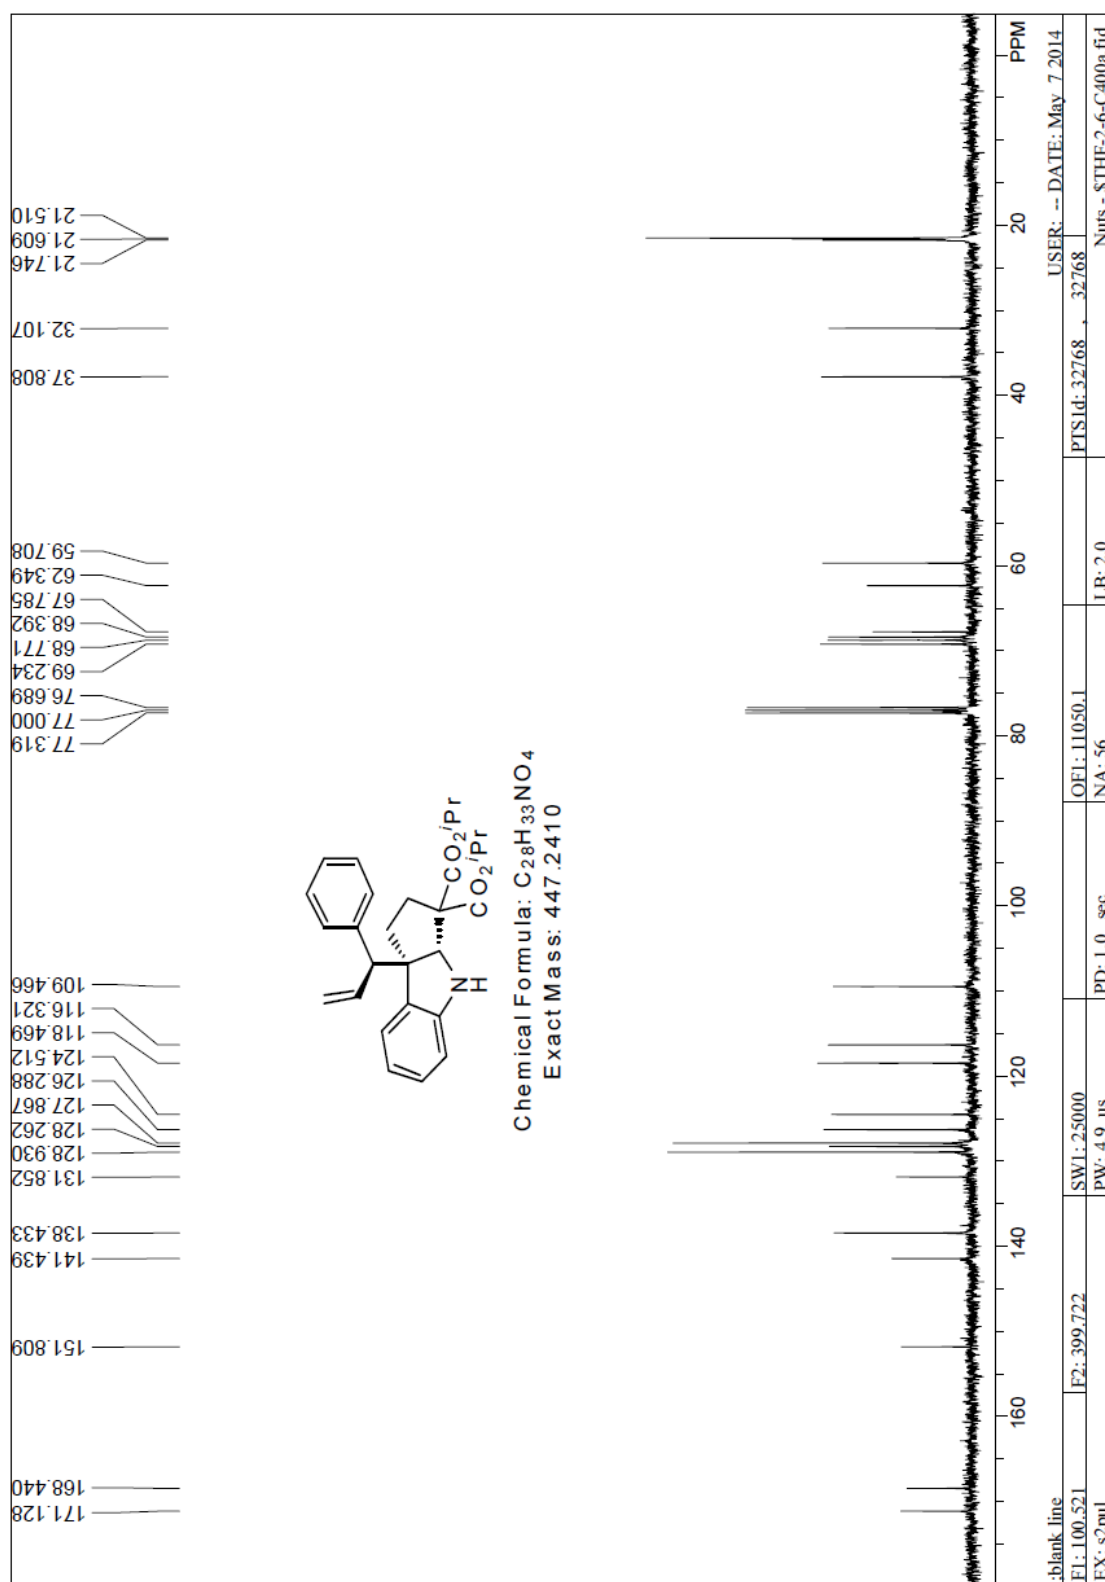

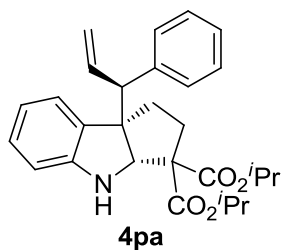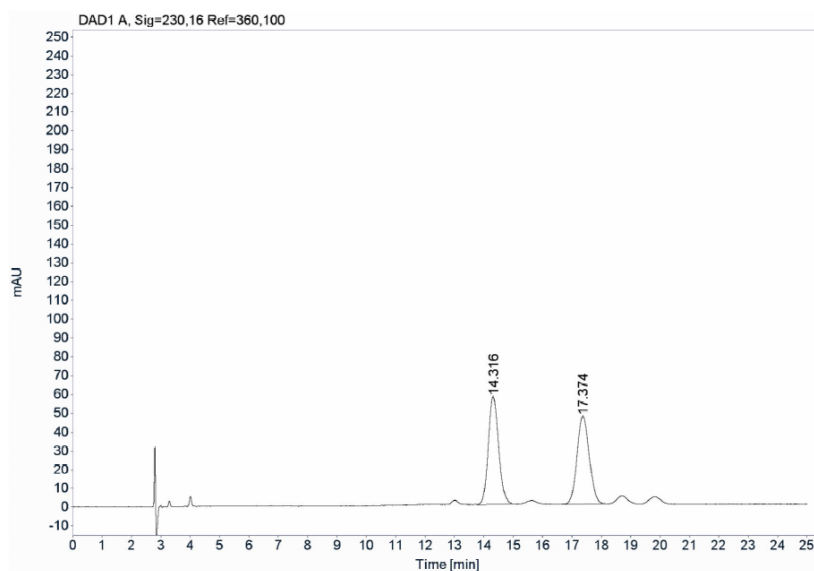

Signal: DAD1 A, Sig=230,16 Ref=360,100

| RT [min] | Type | Width [min] | Area      | Height  | Area%   |
|----------|------|-------------|-----------|---------|---------|
| 14.316   | BB   | 0.3506      | 1403.9894 | 57.3497 | 50.9972 |
| 17.374   | BV   | 0.4111      | 1349.0835 | 46.6965 | 49.0028 |
|          | Sum  |             | 2753.0729 |         |         |

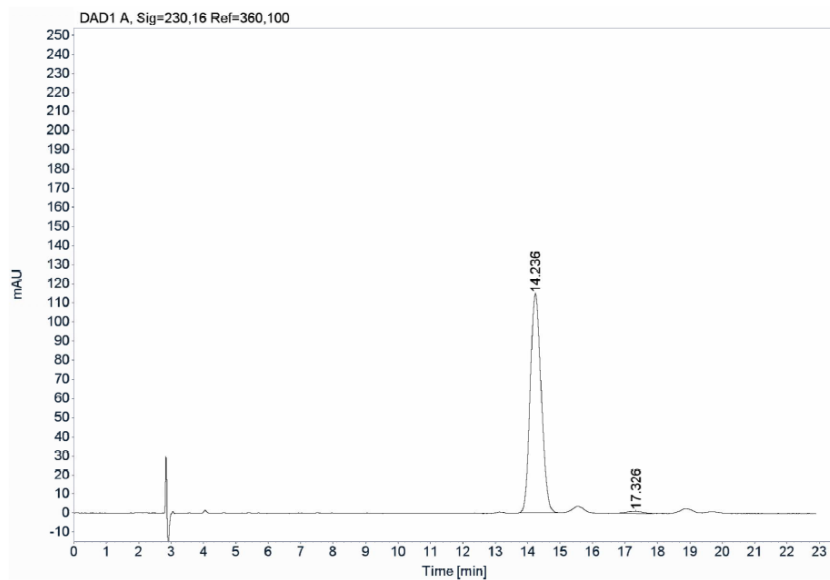

Signal: DAD1 A, Sig=230,16 Ref=360,100

| RT [min] | Type | Width [min] | Area      | Height   | Area%   |
|----------|------|-------------|-----------|----------|---------|
| 14.236   | BB   | 0.3664      | 2701.6035 | 114.4654 | 98.5628 |
| 17.326   | MM R | 0.5300      | 39.3942   | 1.2387   | 1.4372  |
|          | Sum  |             | 2740.9978 |          |         |



Compound **4qa**'s  $^1\text{H}$  NMR Spectra

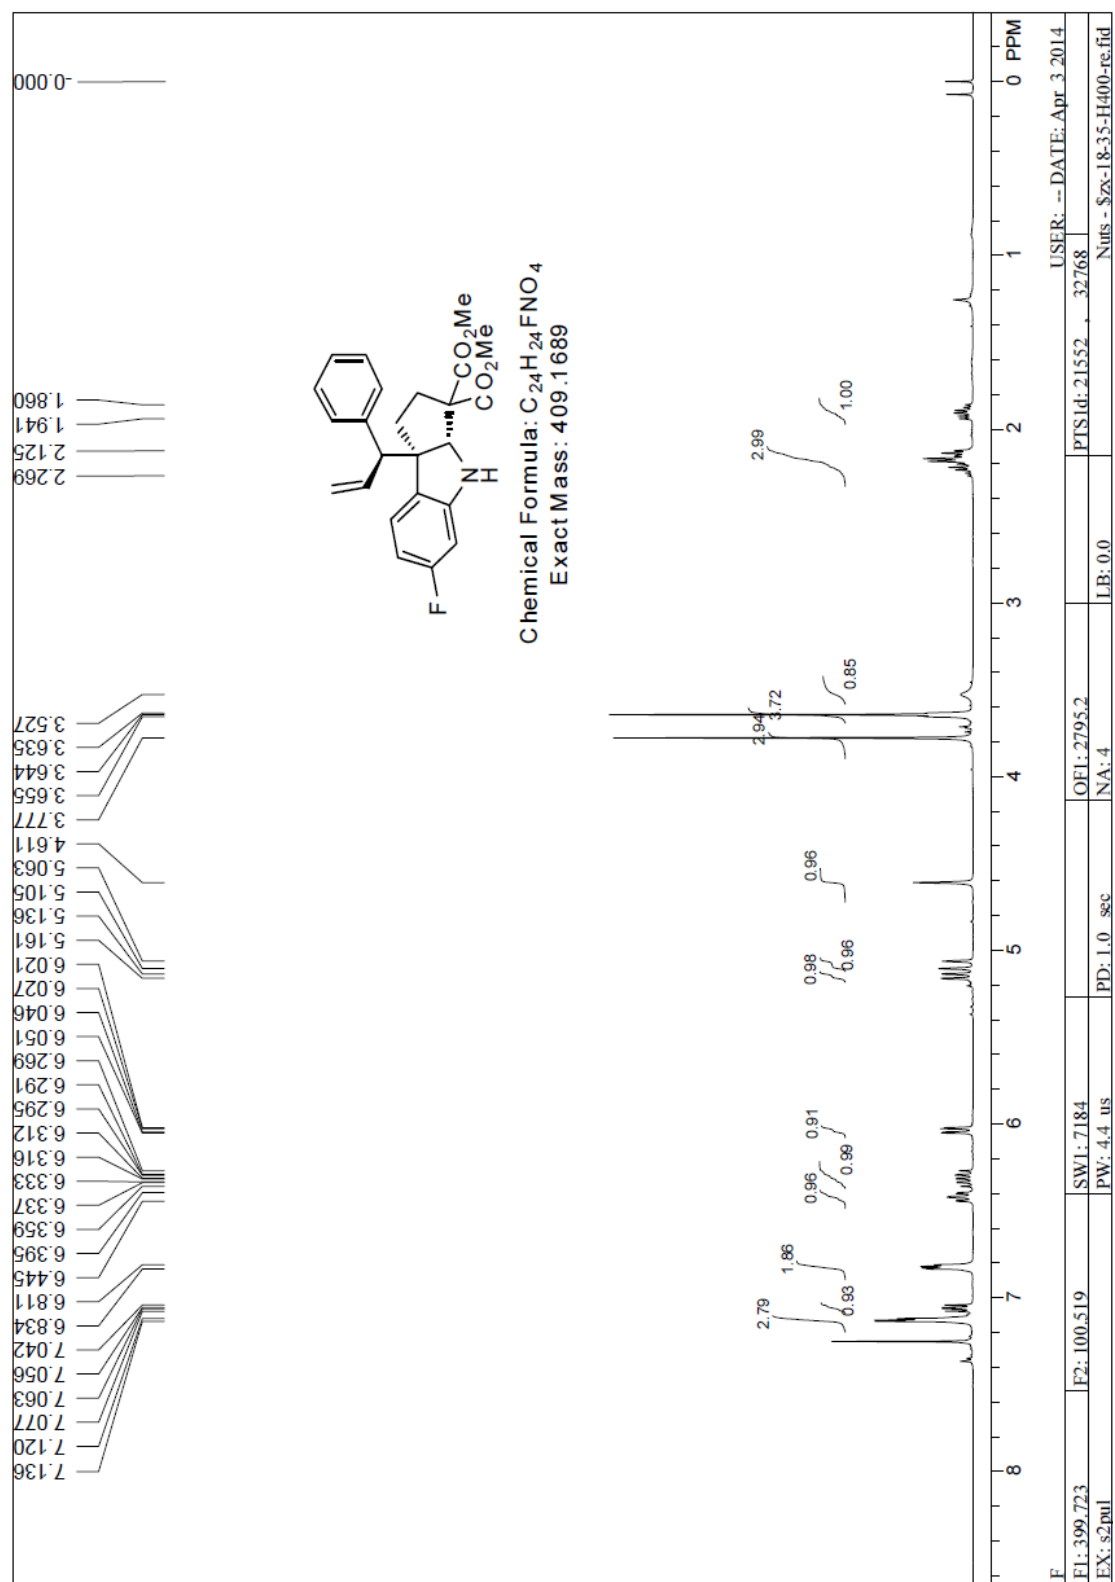

Compound **4qa**'s  $^{13}\text{C}$  NMR Spectra

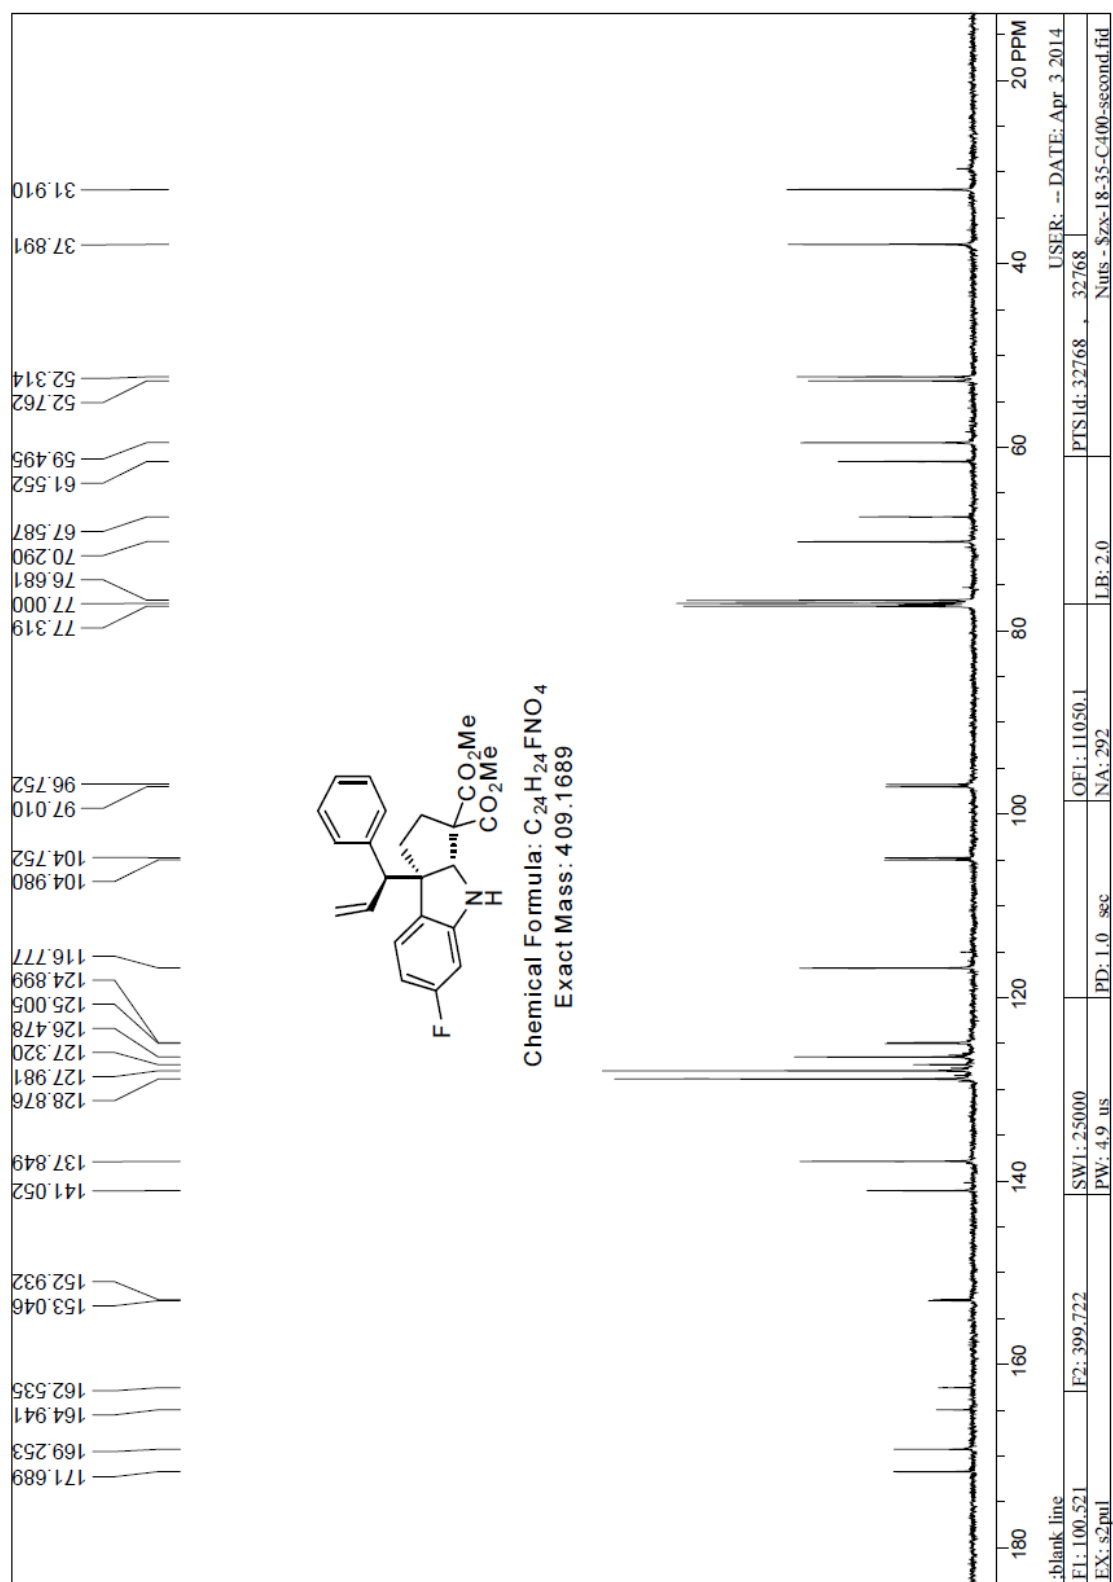

Compound **4qa**'s  $^{19}\text{F}$  NMR Spectra

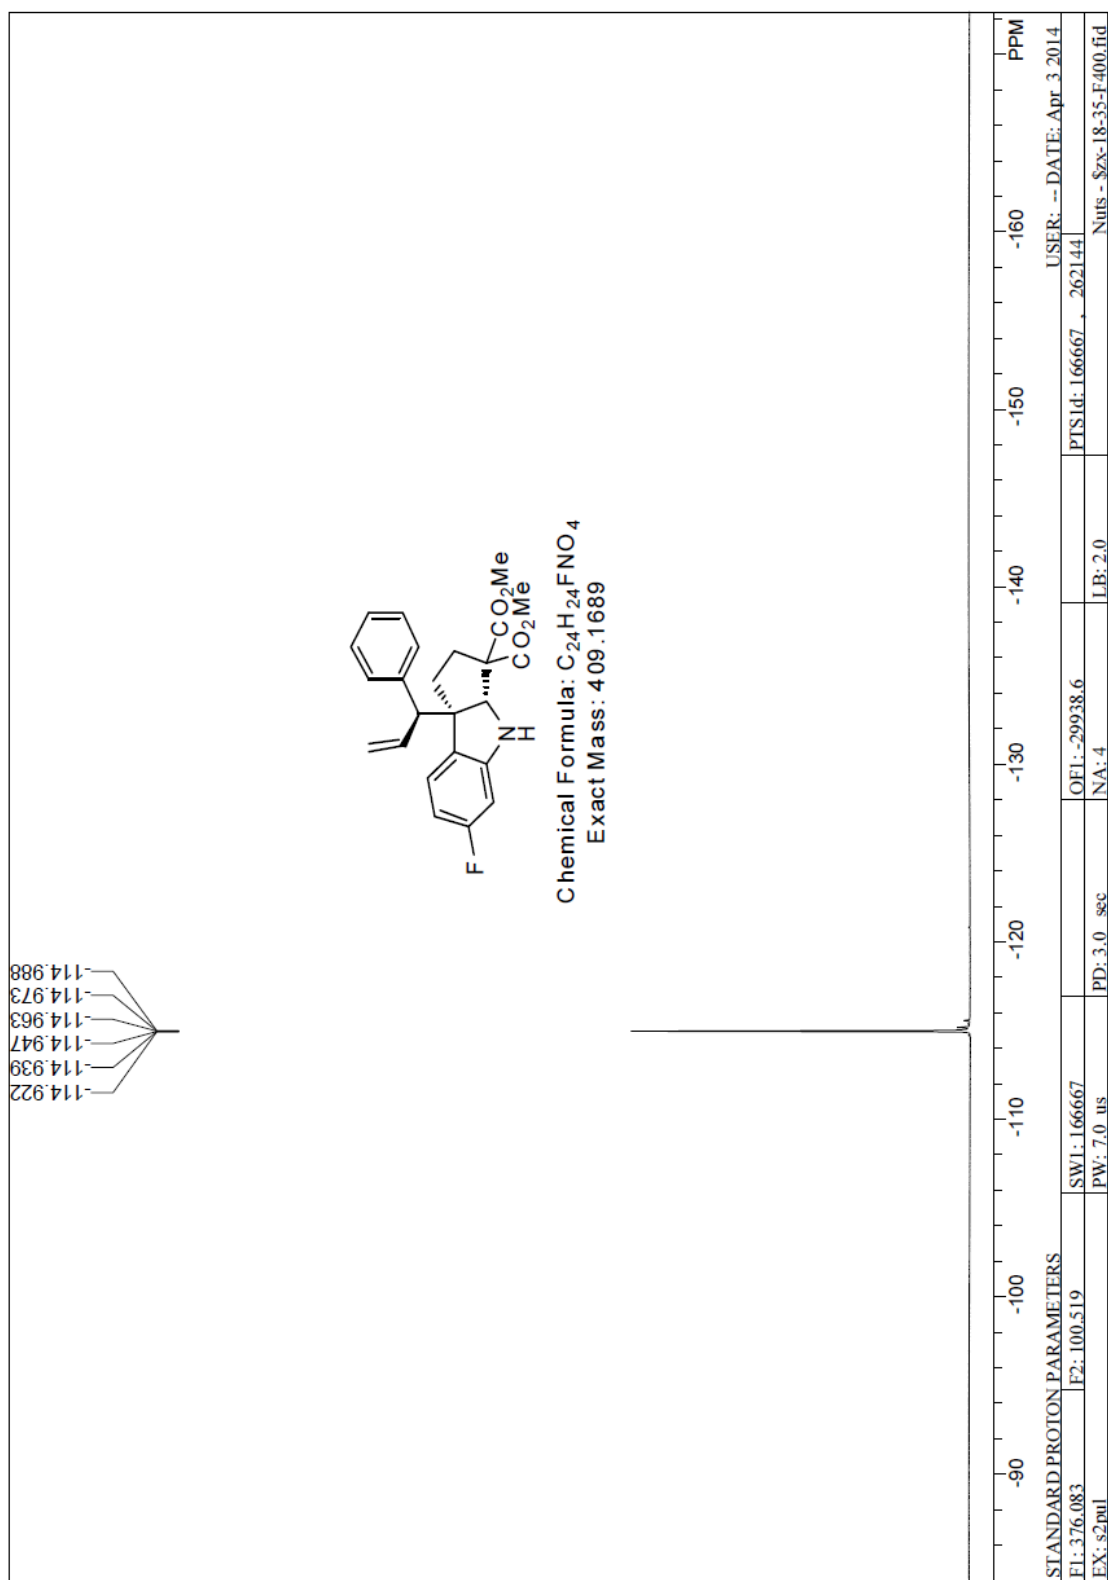

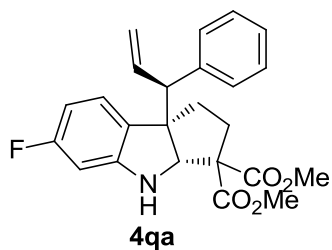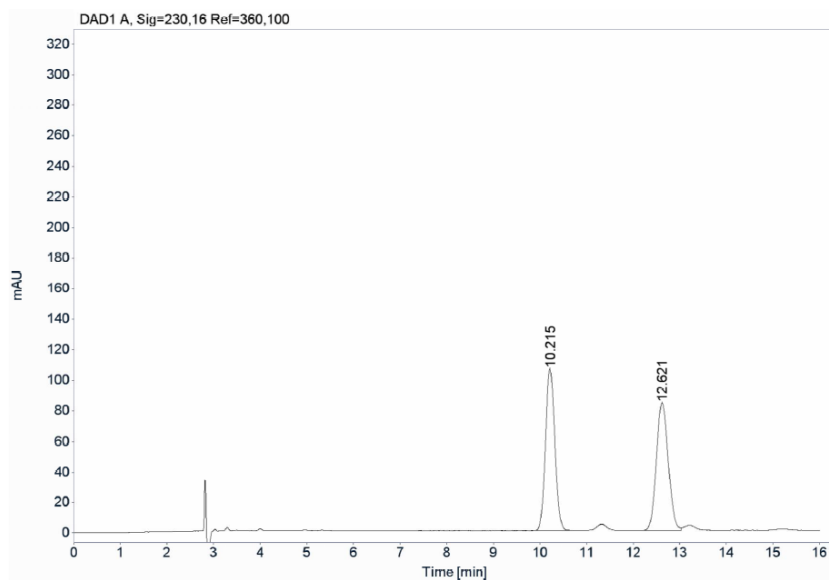

Signal: DAD1 A, Sig=230,16 Ref=360,100

| RT [min] | Type | Width [min] | Area      | Height   | Area%   |
|----------|------|-------------|-----------|----------|---------|
| 10.215   | BB   | 0.2155      | 1473.0198 | 105.7437 | 49.8572 |
| 12.621   | BV   | 0.2759      | 1481.4584 | 83.5192  | 50.1428 |
|          |      | Sum         | 2954.4781 |          |         |

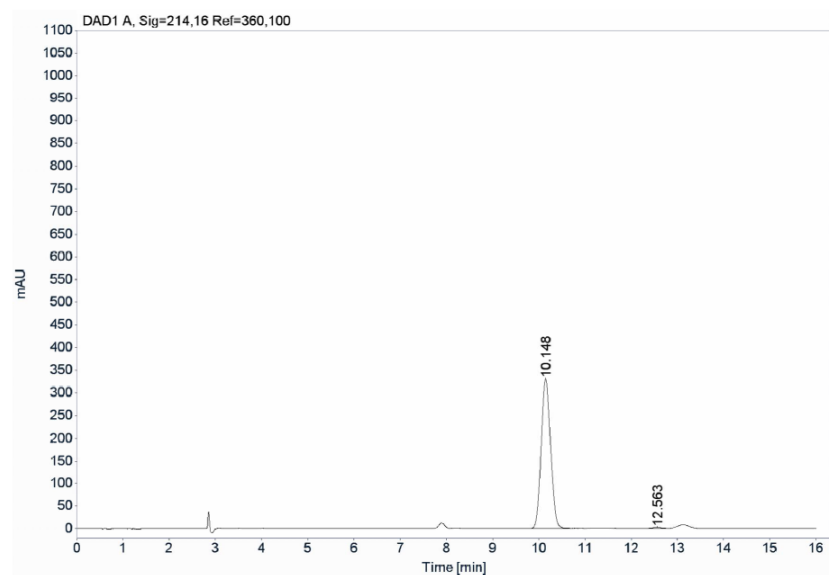

Signal: DAD1 A, Sig=214,16 Ref=360,100

| RT [min] | Type | Width [min] | Area      | Height   | Area%   |
|----------|------|-------------|-----------|----------|---------|
| 10.148   | VB   | 0.2228      | 4695.8584 | 330.4548 | 99.4048 |
| 12.563   | MM R | 0.2486      | 28.1167   | 1.8852   | 0.5952  |
|          |      | Sum         | 4723.9751 |          |         |

Compound *cis*-**4ra**'s  $^1\text{H}$  NMR Spectra

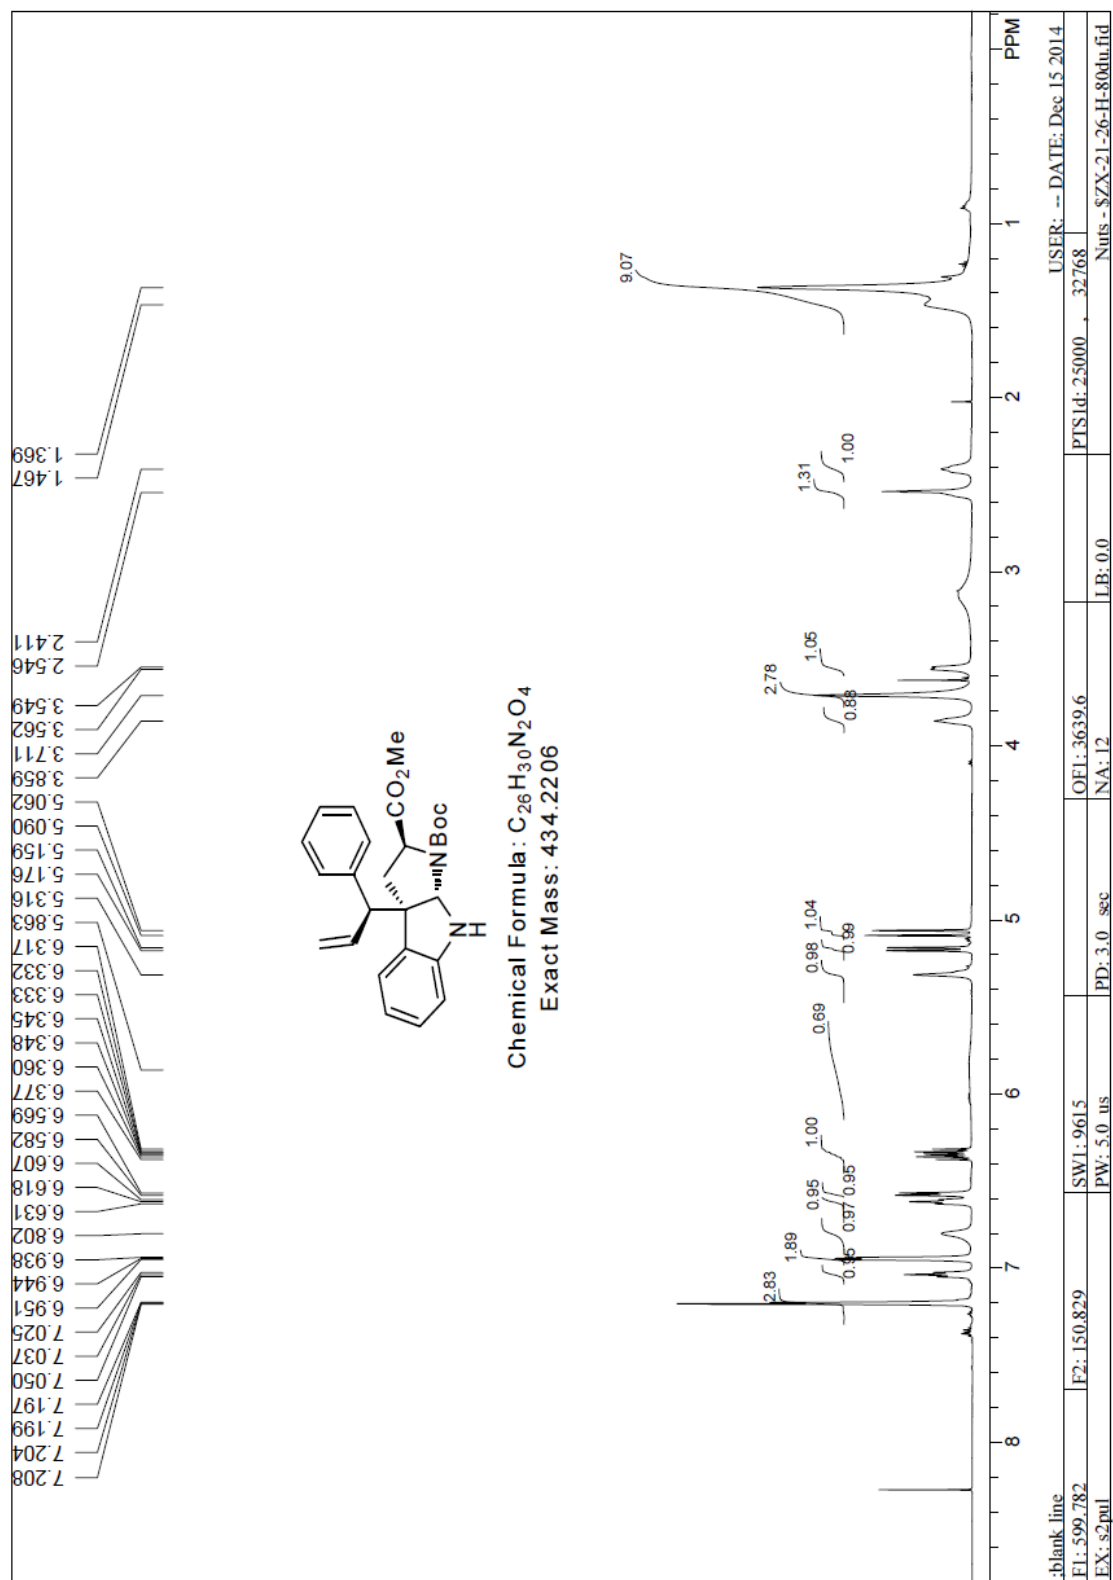

Compound *cis*-**4ra**'s  $^{13}\text{C}$  NMR Spectra

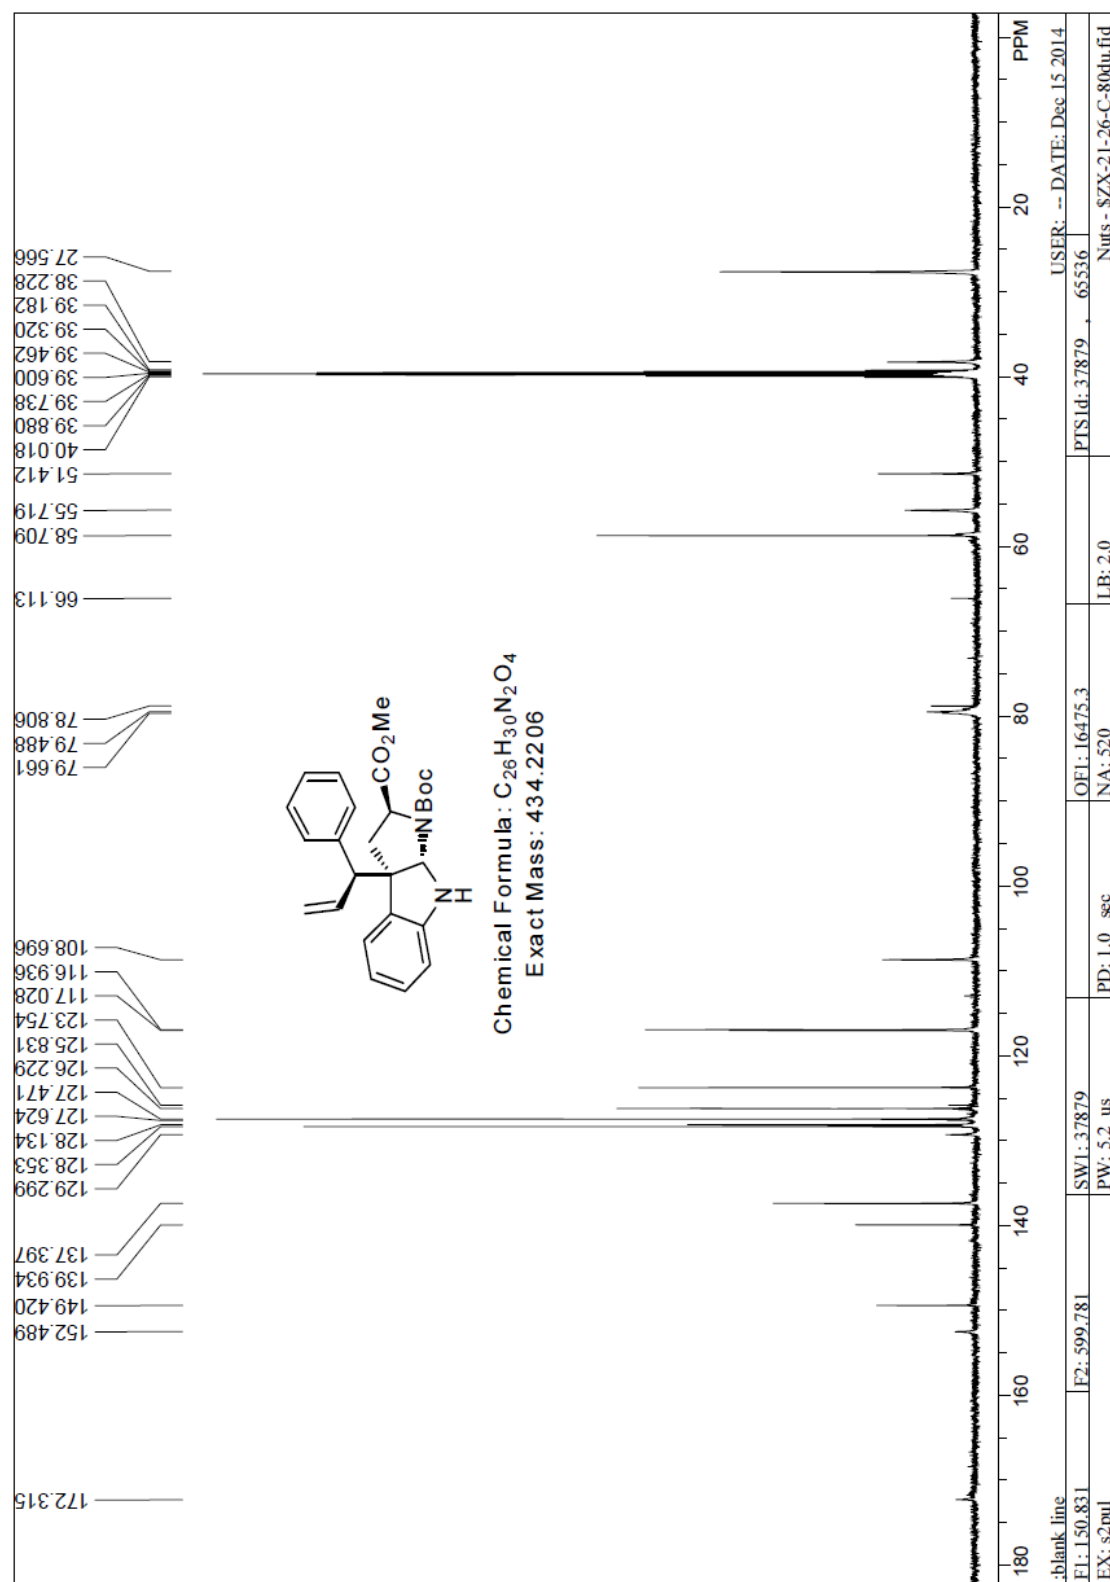

# Compound *cis-4ra*'s $^1\text{H}$ - $^1\text{H}$ COSY Spectra

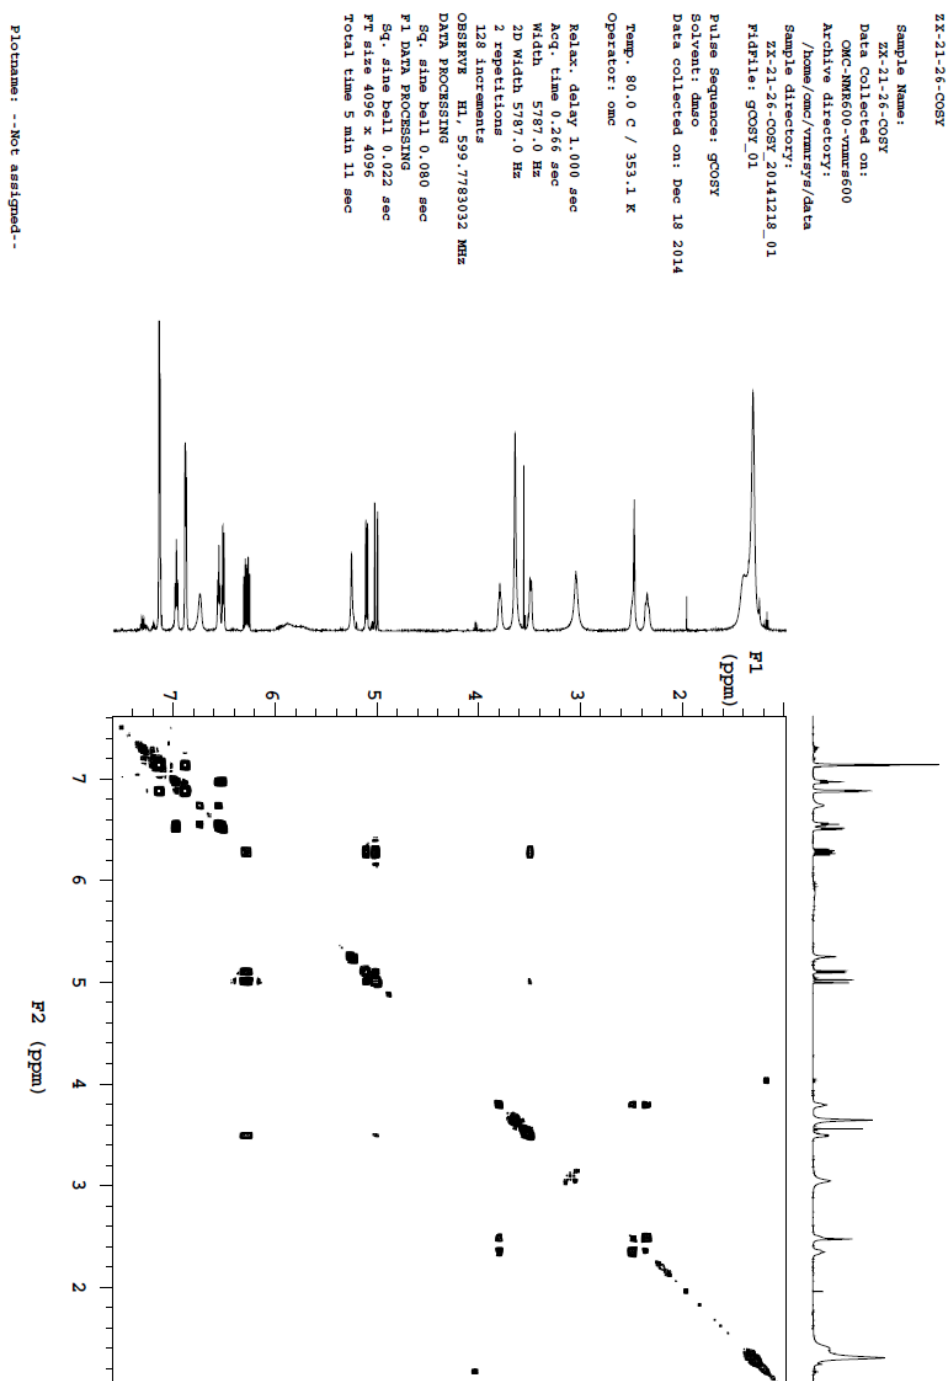

# Compound *cis*-**4ra**'s 2D-NOESY Spectra

ZX-21-26-NOESY

Sample Name:

ZX-21-26-NOESY

Data Collected on:

OMC-NMR600-vnmr600

Archive directory:

/home/omc/vnmr600/data

Sample directory:

ZX-21-26-NOESY\_20141217\_01

F1File: NOESY

Pulse Sequence: NOESY

Solvent: dmsc

Data collected on: Dec 17 2014

Temp. 80.0 C / 353.1 K

Operator: omc

Relax. delay 1.000 sec

Acq. time 0.273 sec

Width 5630.6 Hz

2D Width 5630.6 Hz

8 repetitions

2 x 128 increments

OBSERVE HL 599.7783032 MHz

DATA PROCESSING

Line broadening 3.0 Hz

Gauss apodization 0.039 sec

F1 DATA PROCESSING

Line broadening 3.0 Hz

Gauss apodization 0.012 sec

FT size 4096 x 4096

Total time 1 hr, 4 min

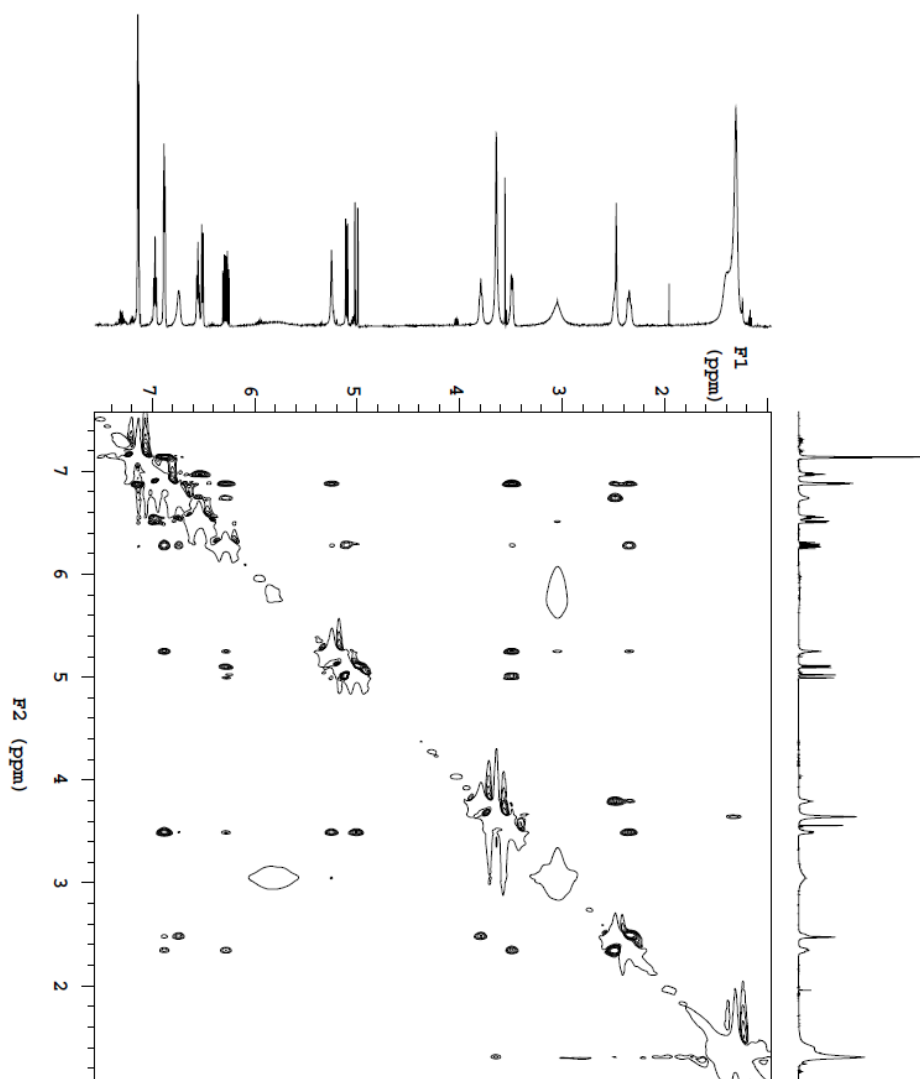



Compound *trans*-**4ra**'s  $^1\text{H}$  NMR Spectra

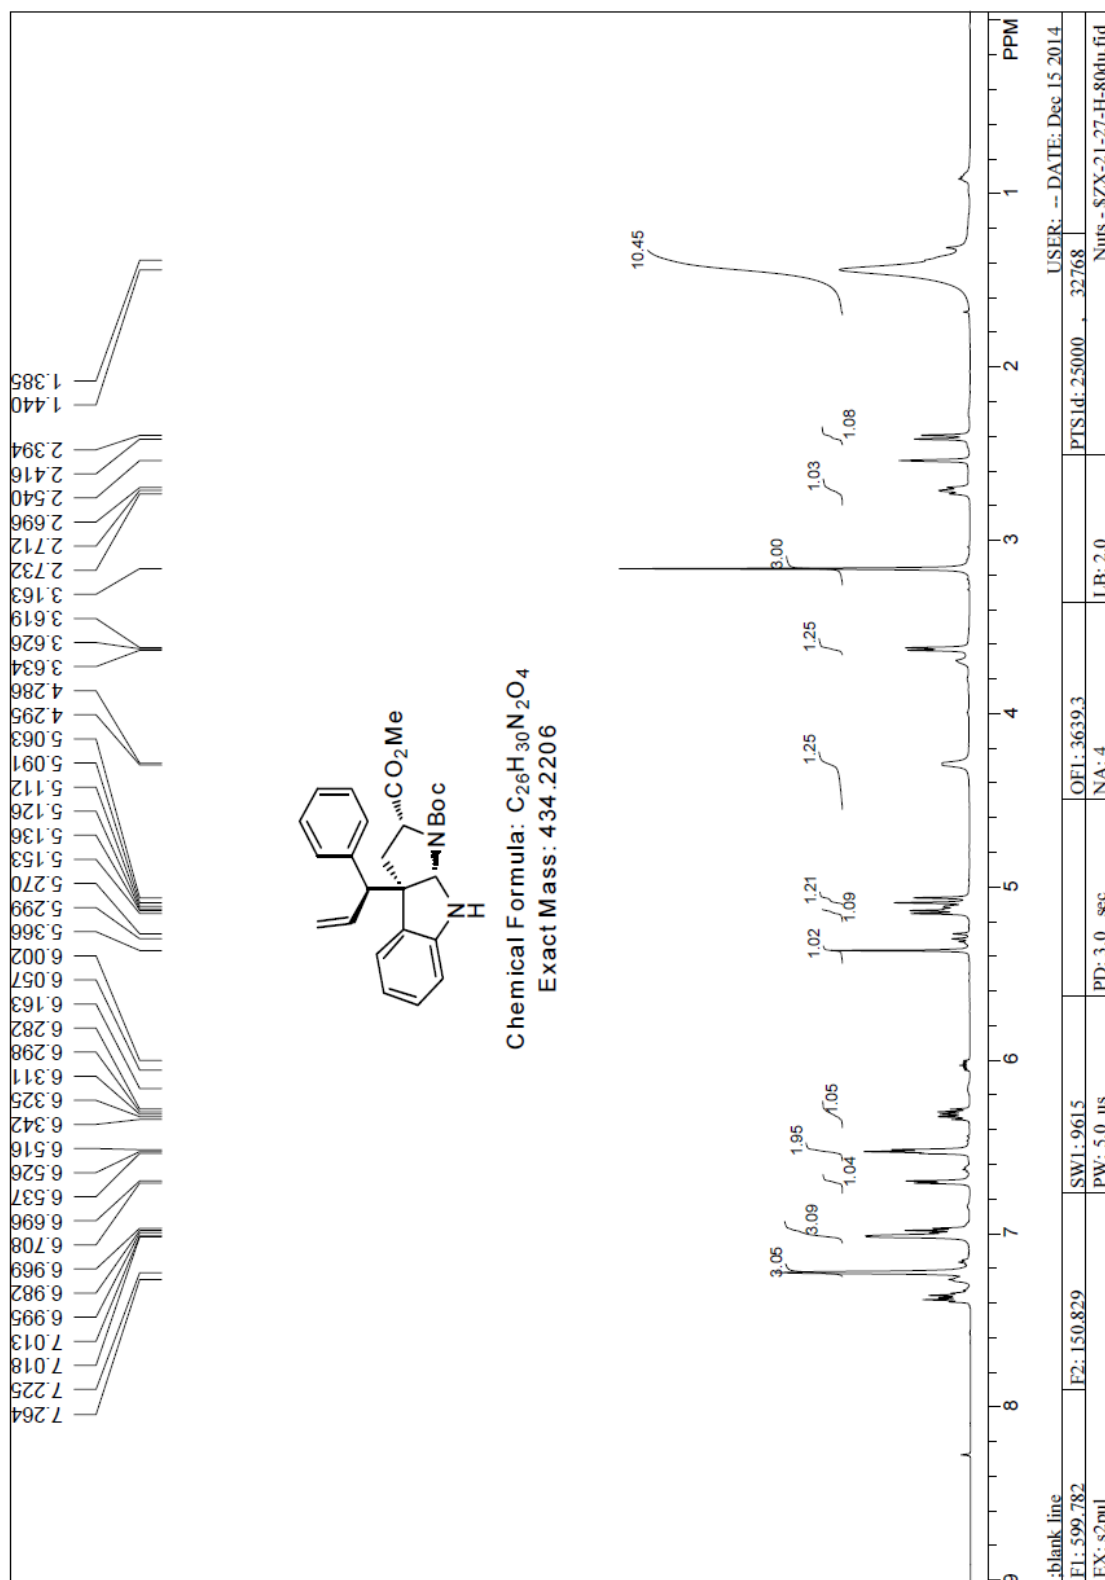

Compound *trans*-**4ra**'s  $^{13}\text{C}$  NMR Spectra

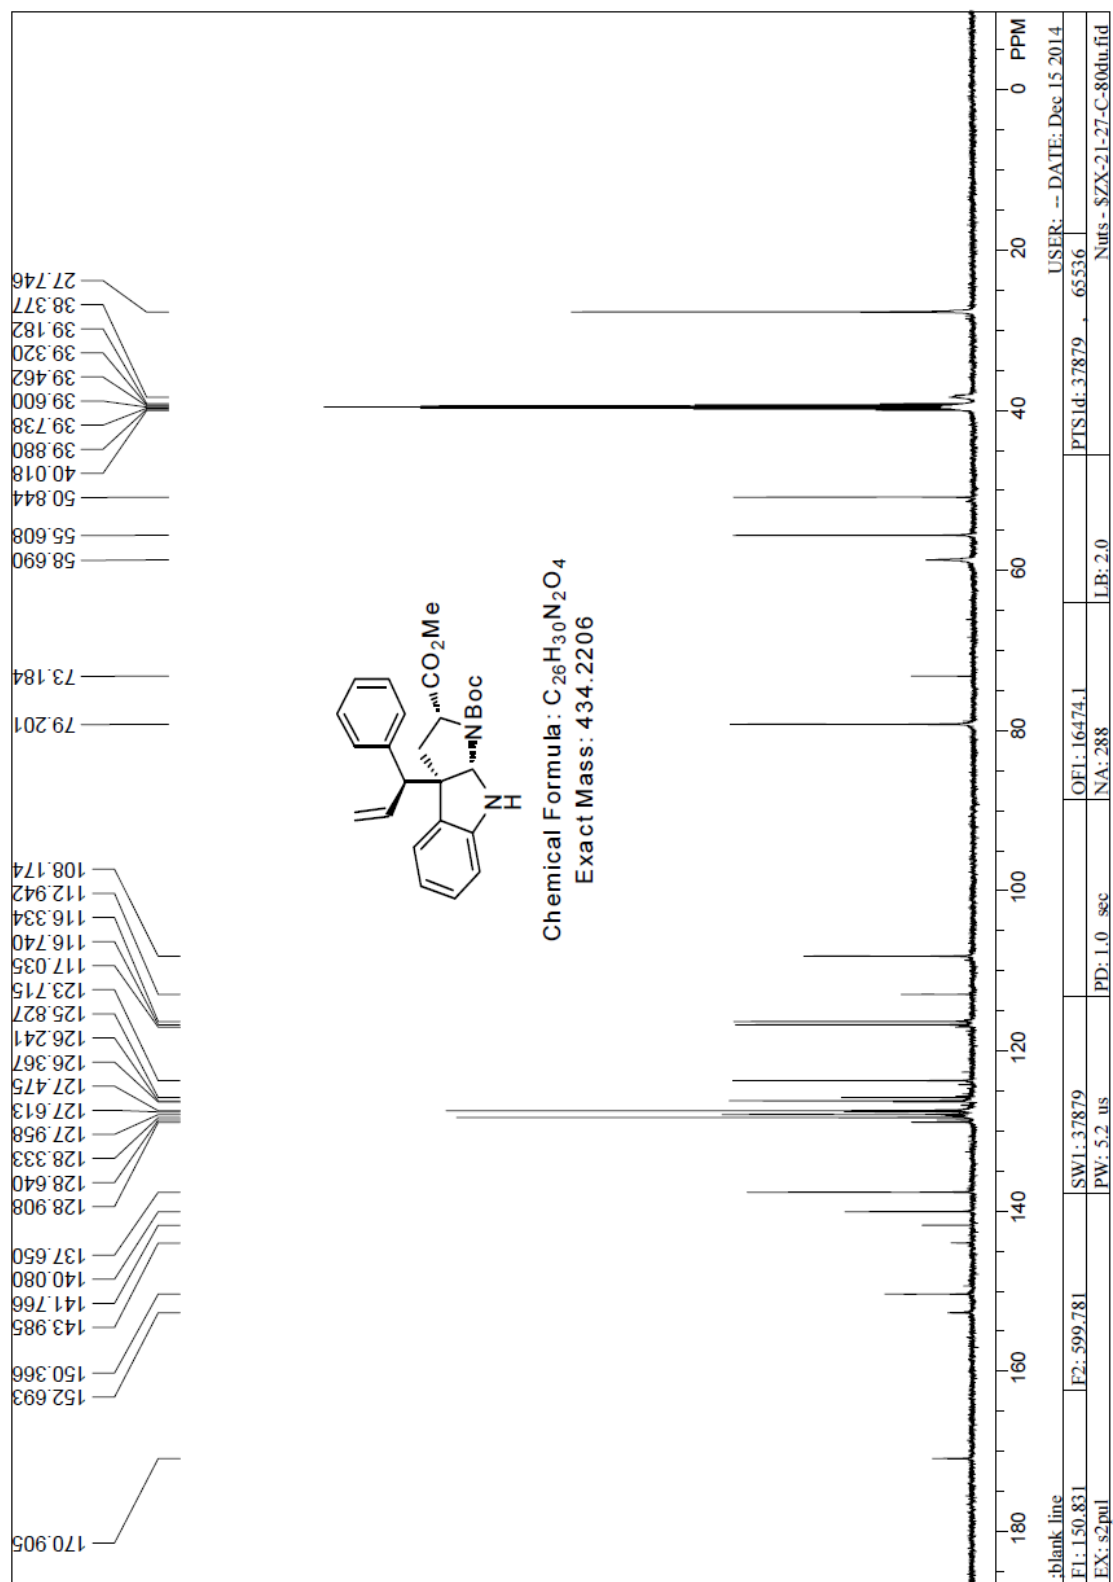

# Compound *trans*-**4ra**'s <sup>1</sup>H-<sup>1</sup>H COSY Spectra

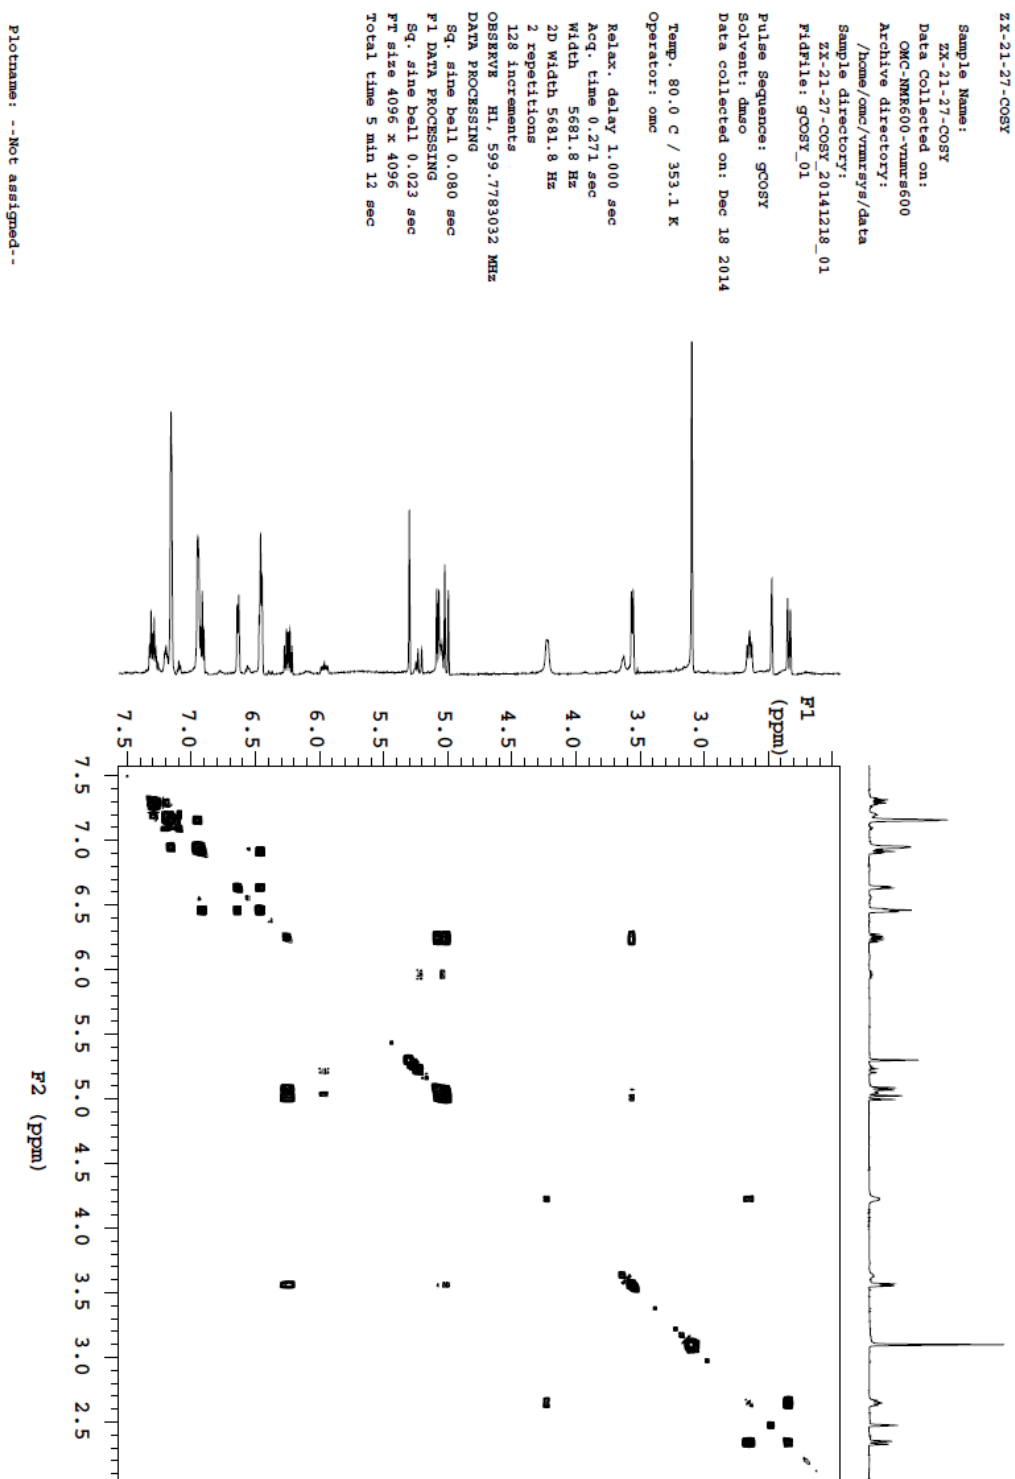

# Compound *trans*-**4ra**'s 2D-NOESY Spectra

ZX-21-27-NOESY

Sample Name:

ZX-21-27-NOESY

Data Collected on:

OMC-NMR600-vnmrs600

Archive directory:

/home/omc/vnmrs/data

Sample directory:

ZX-21-27-NOESY\_20141217\_01

FidFile: NOESY\_01

Pulse Sequence: NOESY

Solvent: dms

Data collected on: Dec 17 2014

Temp. 70.0 C / 343.1 K

Operator: omc

Relax. delay 1.000 sec

Acq. time 0.196 sec

Width 7861.6 Hz

2D Width 7861.6 Hz

8 repetitions

2 x 128 increments

OBSERVE H1, 599.7783032 MHz

DATA PROCESSING

Line broadening 3.0 Hz

Gauss apodization 0.036 sec

F1 DATA PROCESSING

Line broadening 3.0 Hz

Gauss apodization 0.012 sec

FT size 4096 x 4096

Total time 1 hr

Plotname: --Not assigned--

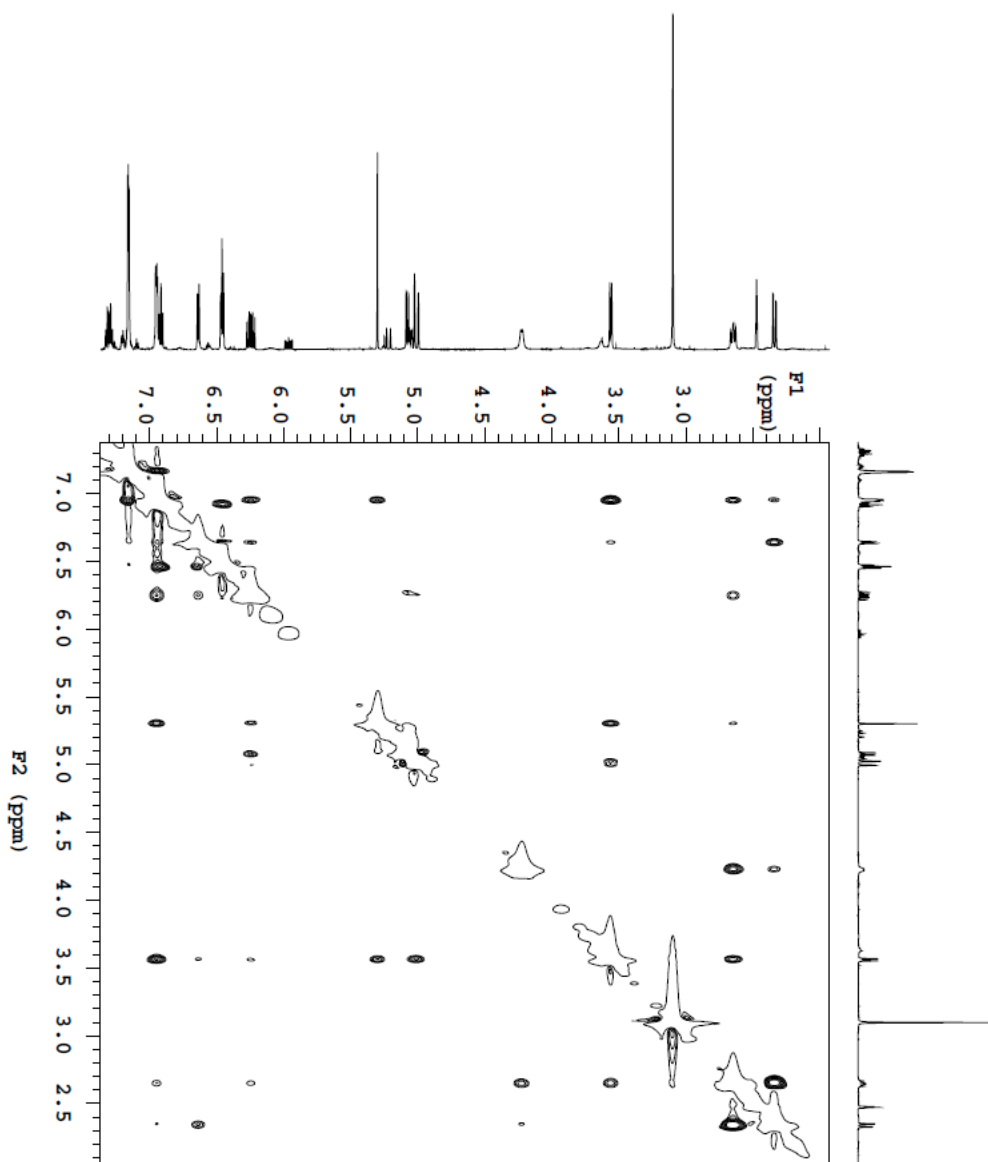

Compound 7's  $^1\text{H}$  NMR Spectra

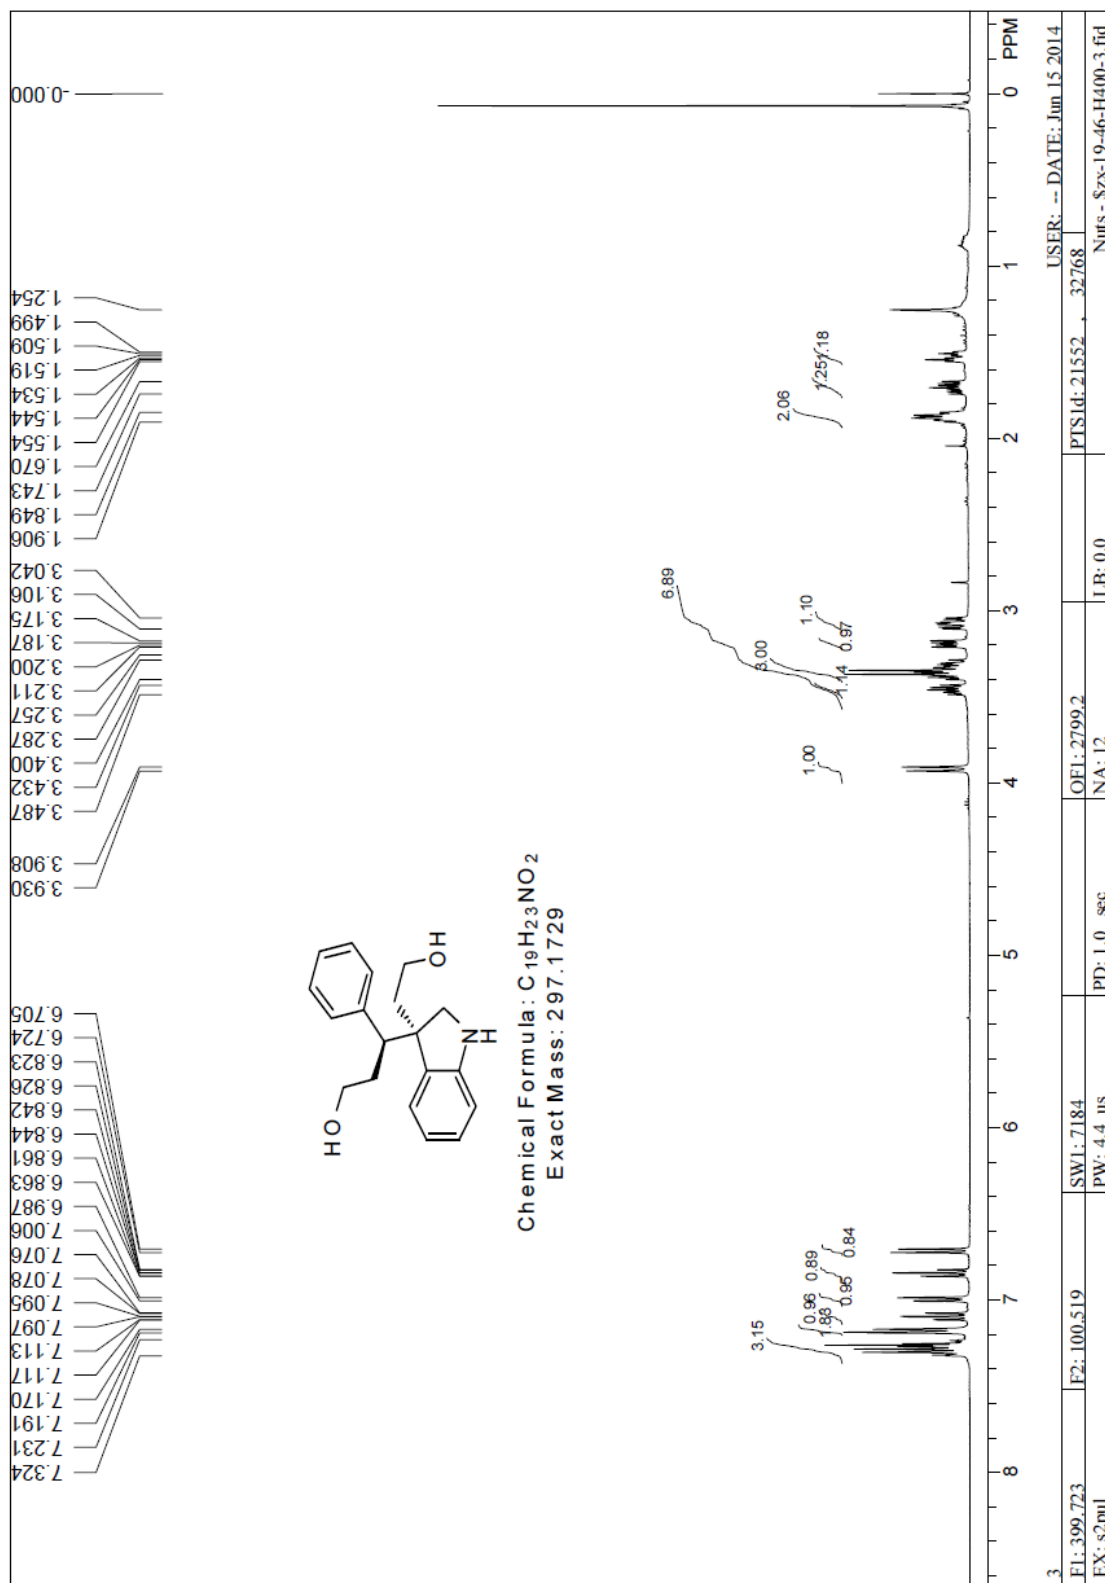

Compound 7's  $^{13}\text{C}$  NMR Spectra

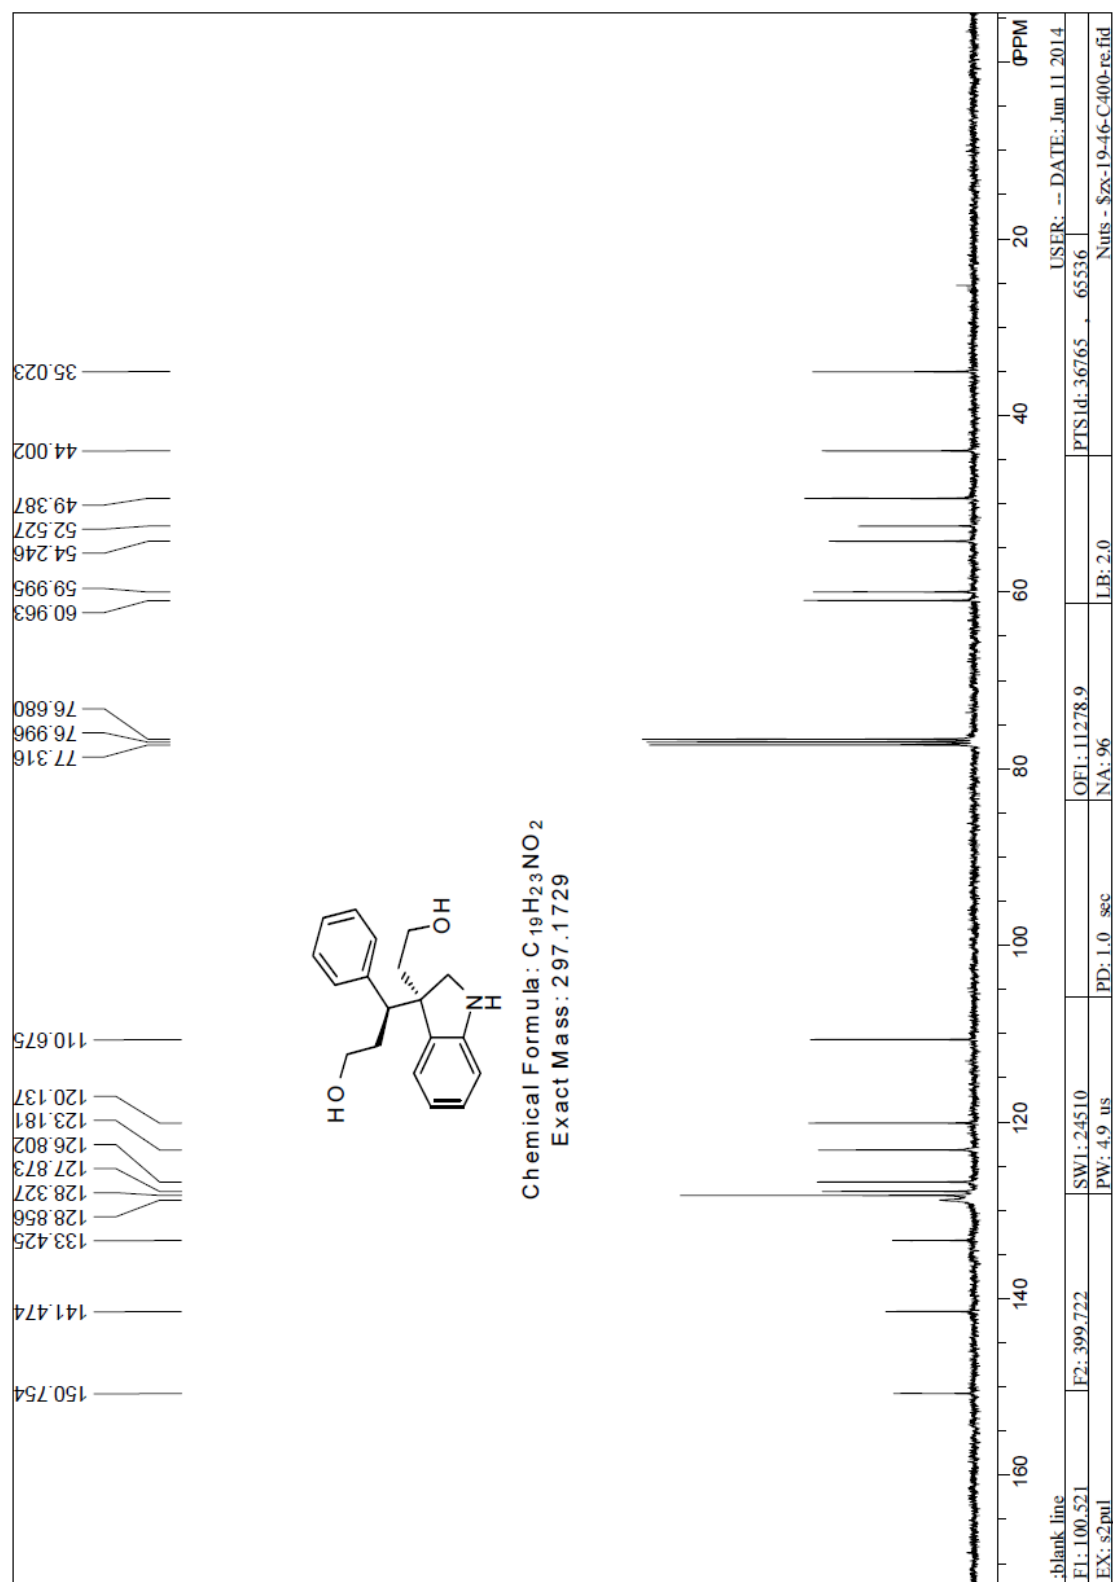

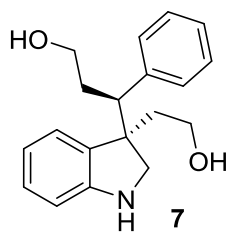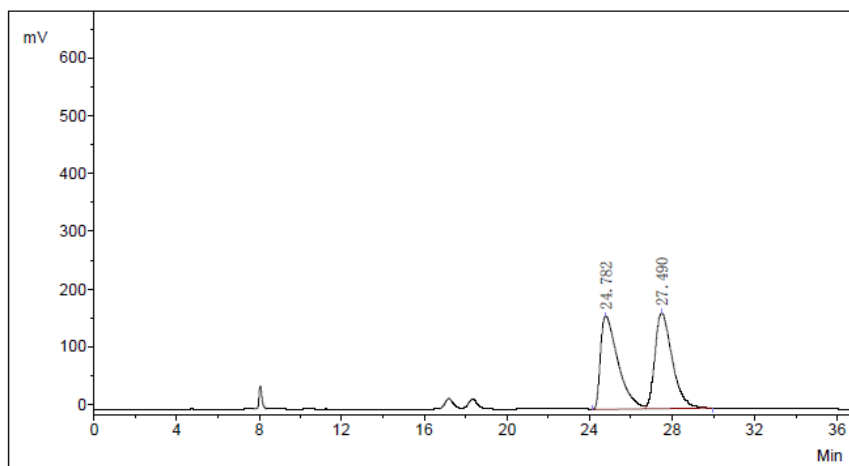

| No.   | PeakNo | ID. Name | R. Time | PeakHeight | PeakArea   | PerCent  |
|-------|--------|----------|---------|------------|------------|----------|
| 1     | 1      | Unknown  | 24.782  | 161251.8   | 9465163.5  | 49.6670  |
| 2     | 2      | Unknown  | 27.490  | 165357.4   | 9592086.8  | 50.3330  |
| Total |        |          |         | 326609.2   | 19057250.4 | 100.0000 |

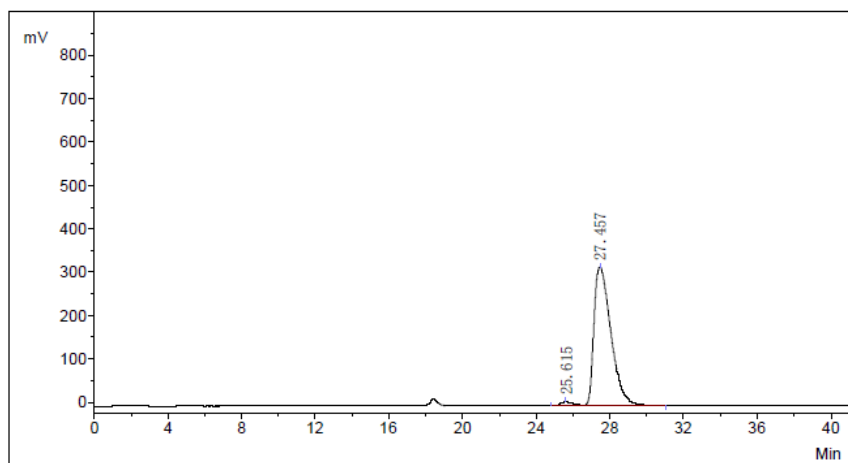

| No.   | PeakNo | ID. Name | R. Time | PeakHeight | PeakArea   | PerCent  |
|-------|--------|----------|---------|------------|------------|----------|
| 1     | 1      | Unknown  | 25.615  | 9945.7     | 527741.2   | 2.5085   |
| 2     | 2      | Unknown  | 27.457  | 320568.4   | 20510002.0 | 97.4915  |
| Total |        |          |         | 330514.1   | 21037743.2 | 100.0000 |

Compound **8**'s  $^1\text{H}$  NMR Spectra

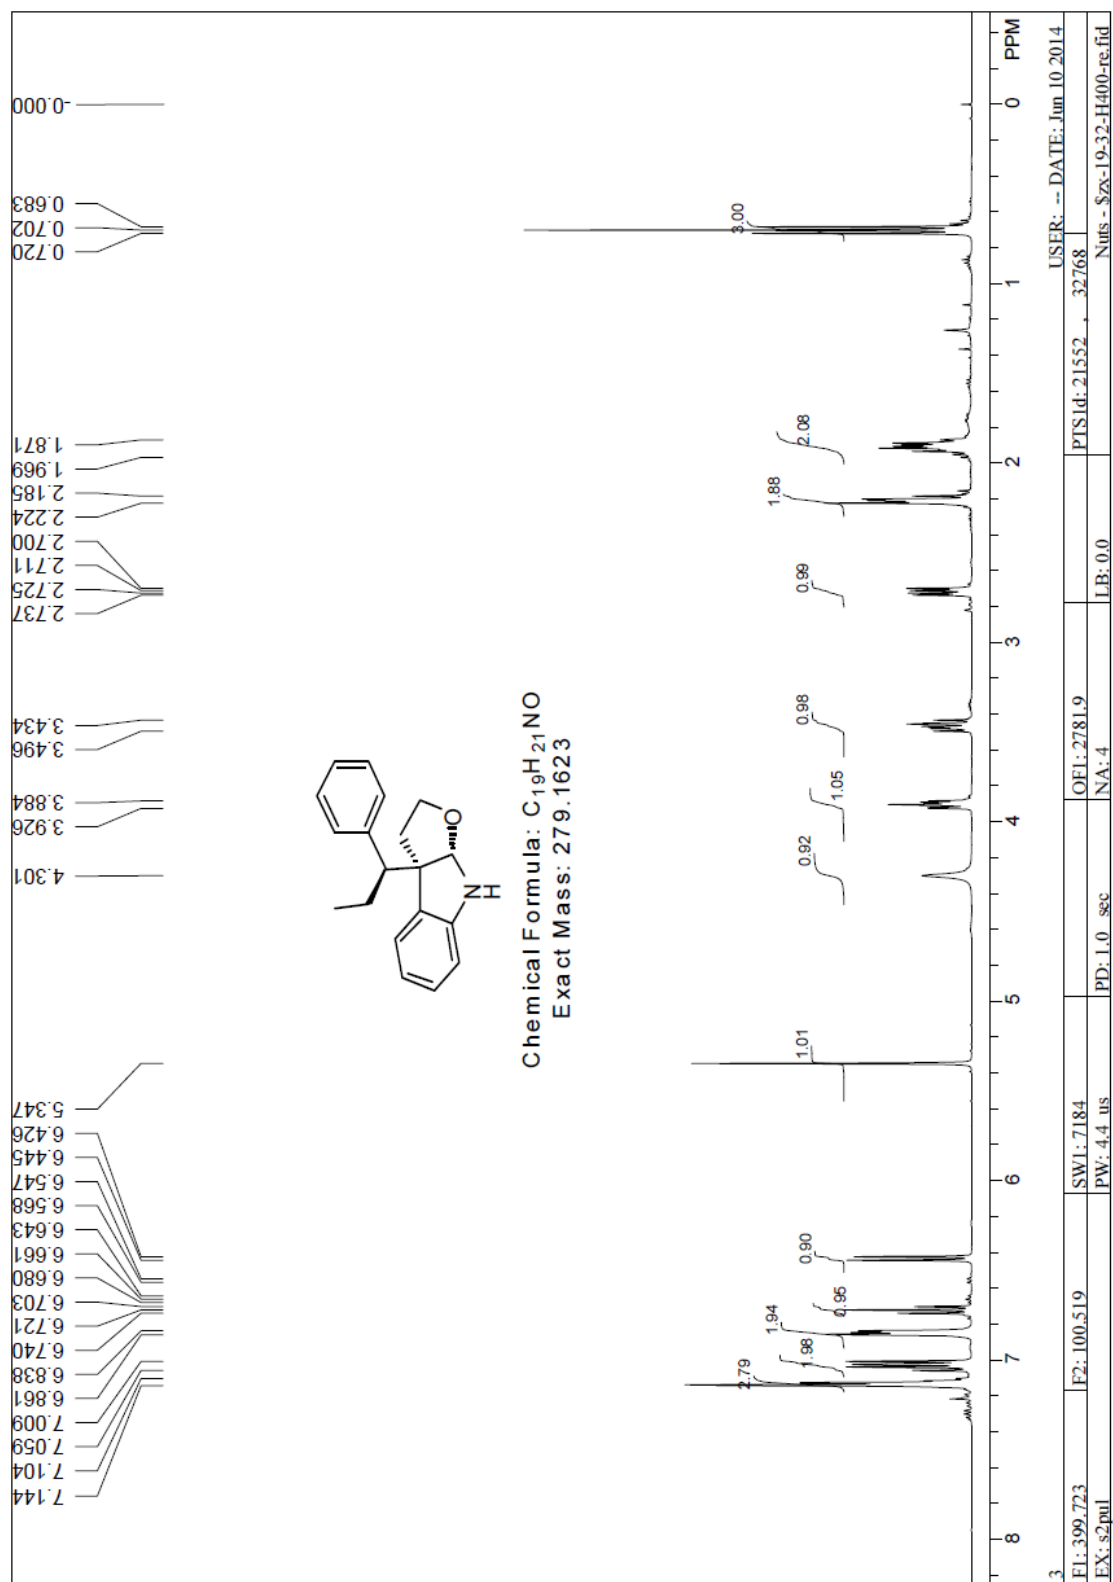



Compound **8**'s  $^{13}\text{C}$  NMR Spectra

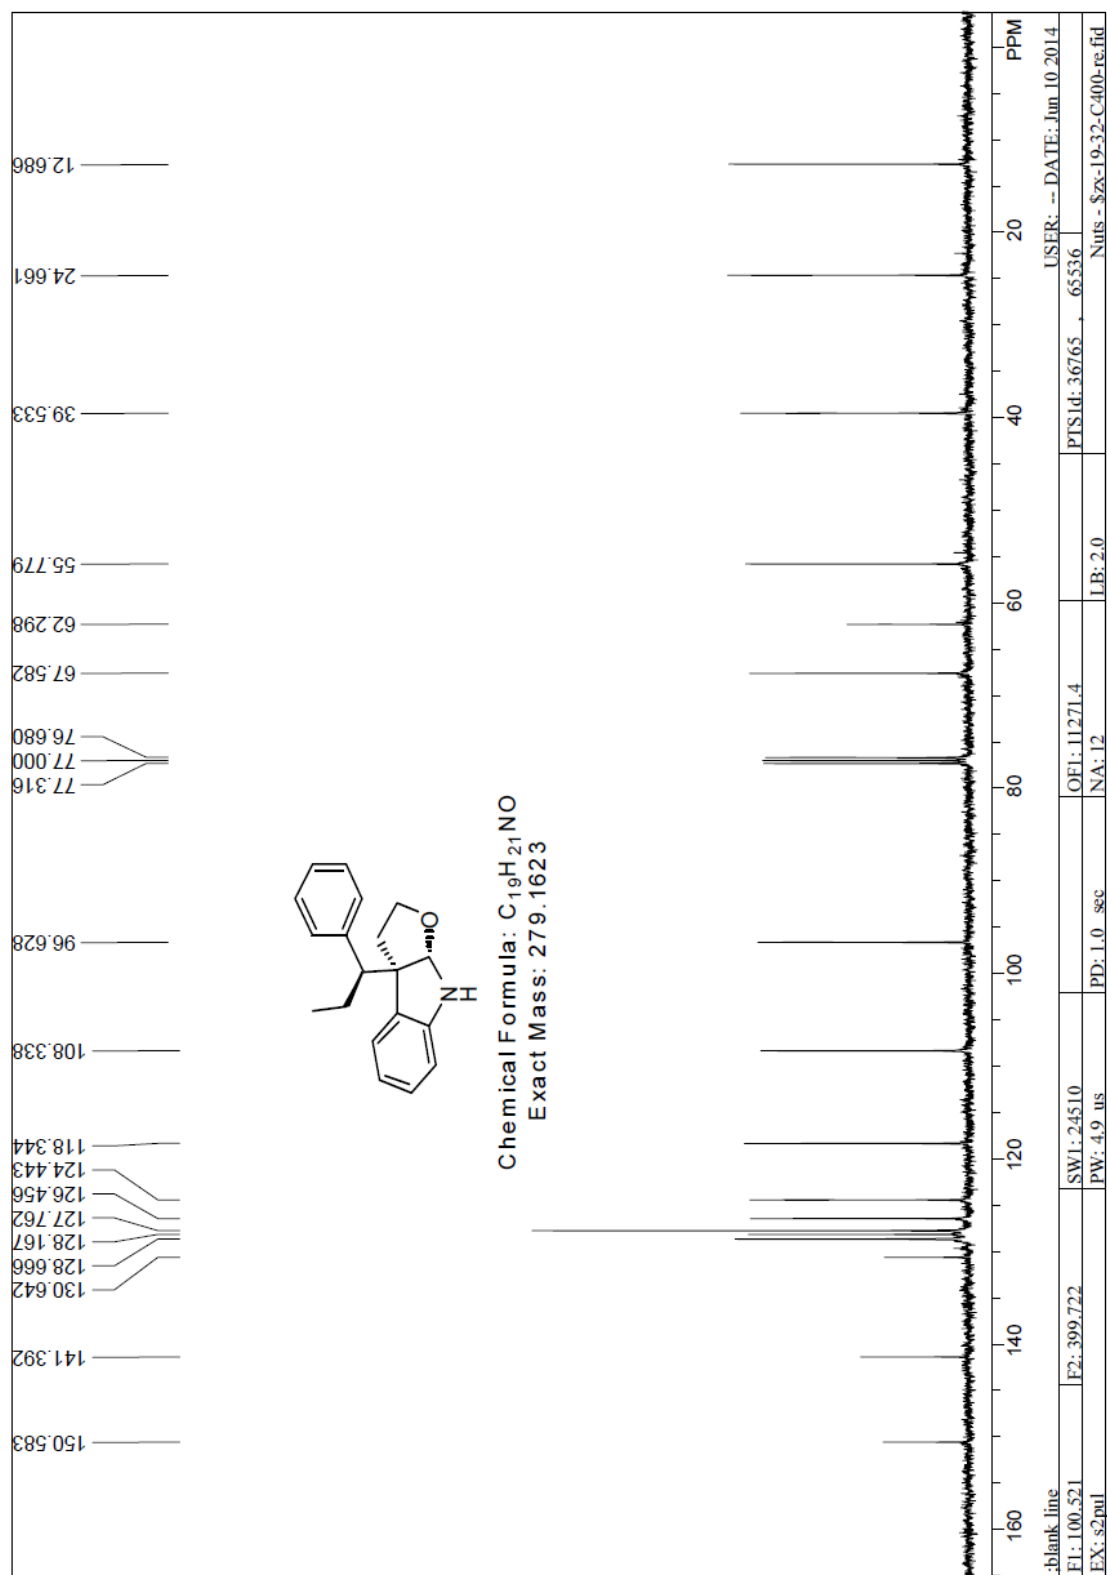

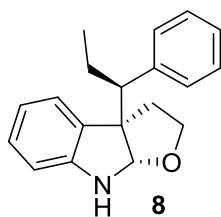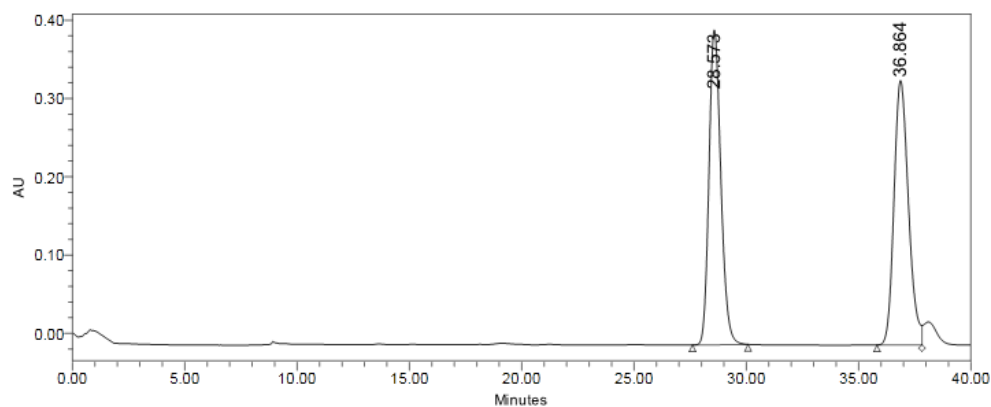

Channel: W2489 ChA; Processed Channel: W2489 ChA 254nm; Injection: 1; Date Acquired: 6/10/2014  
7:38:38 AM CST; Result Id: 1246; Processing Method: 1

**Peak Name:**

|           | Injection | RT     | Area     | % Area | Height |
|-----------|-----------|--------|----------|--------|--------|
| 1         | 1         | 36.864 | 15085666 | 50.58  | 337880 |
| 2         | 1         | 28.573 | 14738620 | 49.42  | 402181 |
| Mean      |           | 32.719 |          |        |        |
| Std. Dev. |           | 5.863  |          |        |        |
| % RSD     |           | 17.92  |          |        |        |

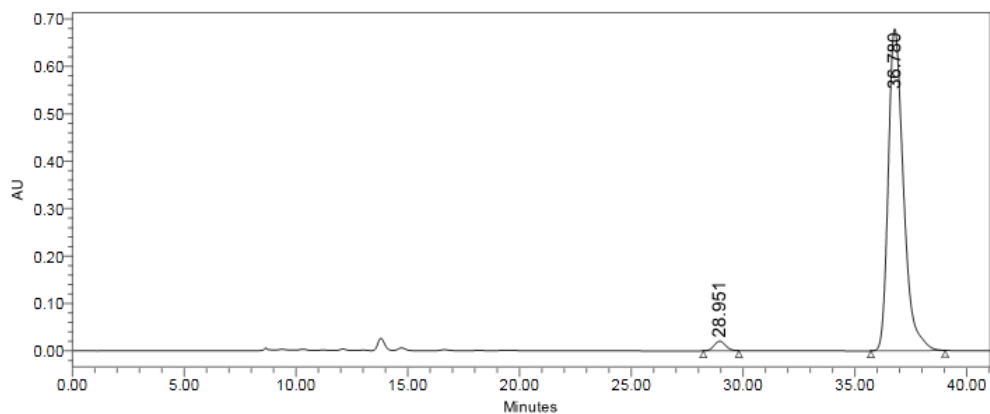

Channel: W2489 ChA; Processed Channel: W2489 ChA 254nm; Injection: 1; Date Acquired: 6/10/2014  
8:19:04 AM CST; Result Id: 1191; Processing Method: 1

**Peak Name:**

|           | Injection | RT     | Area     | % Area | Height |
|-----------|-----------|--------|----------|--------|--------|
| 1         | 1         | 36.780 | 32067662 | 97.78  | 678875 |
| 2         | 1         | 28.951 | 728629   | 2.22   | 20326  |
| Mean      |           | 32.866 |          |        |        |
| Std. Dev. |           | 5.536  |          |        |        |
| % RSD     |           | 16.84  |          |        |        |

Compound **9**'s  $^1\text{H}$  NMR Spectra

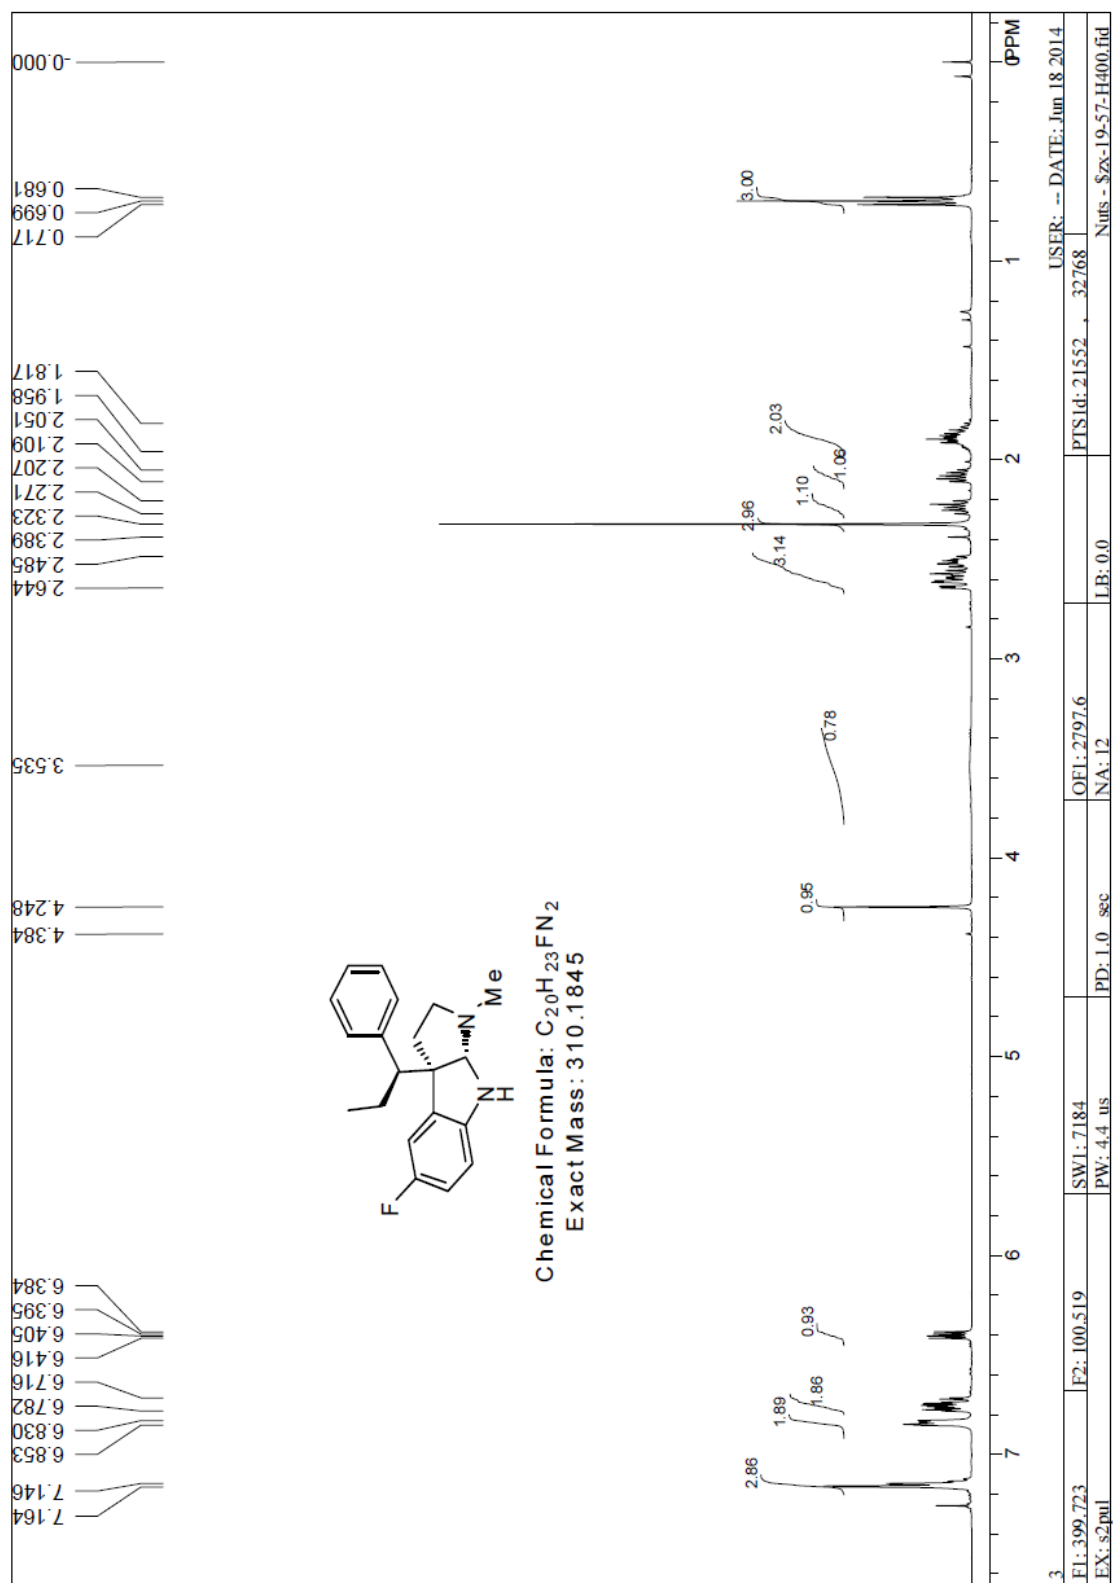

Compound **9**'s  $^{13}\text{C}$  NMR Spectra

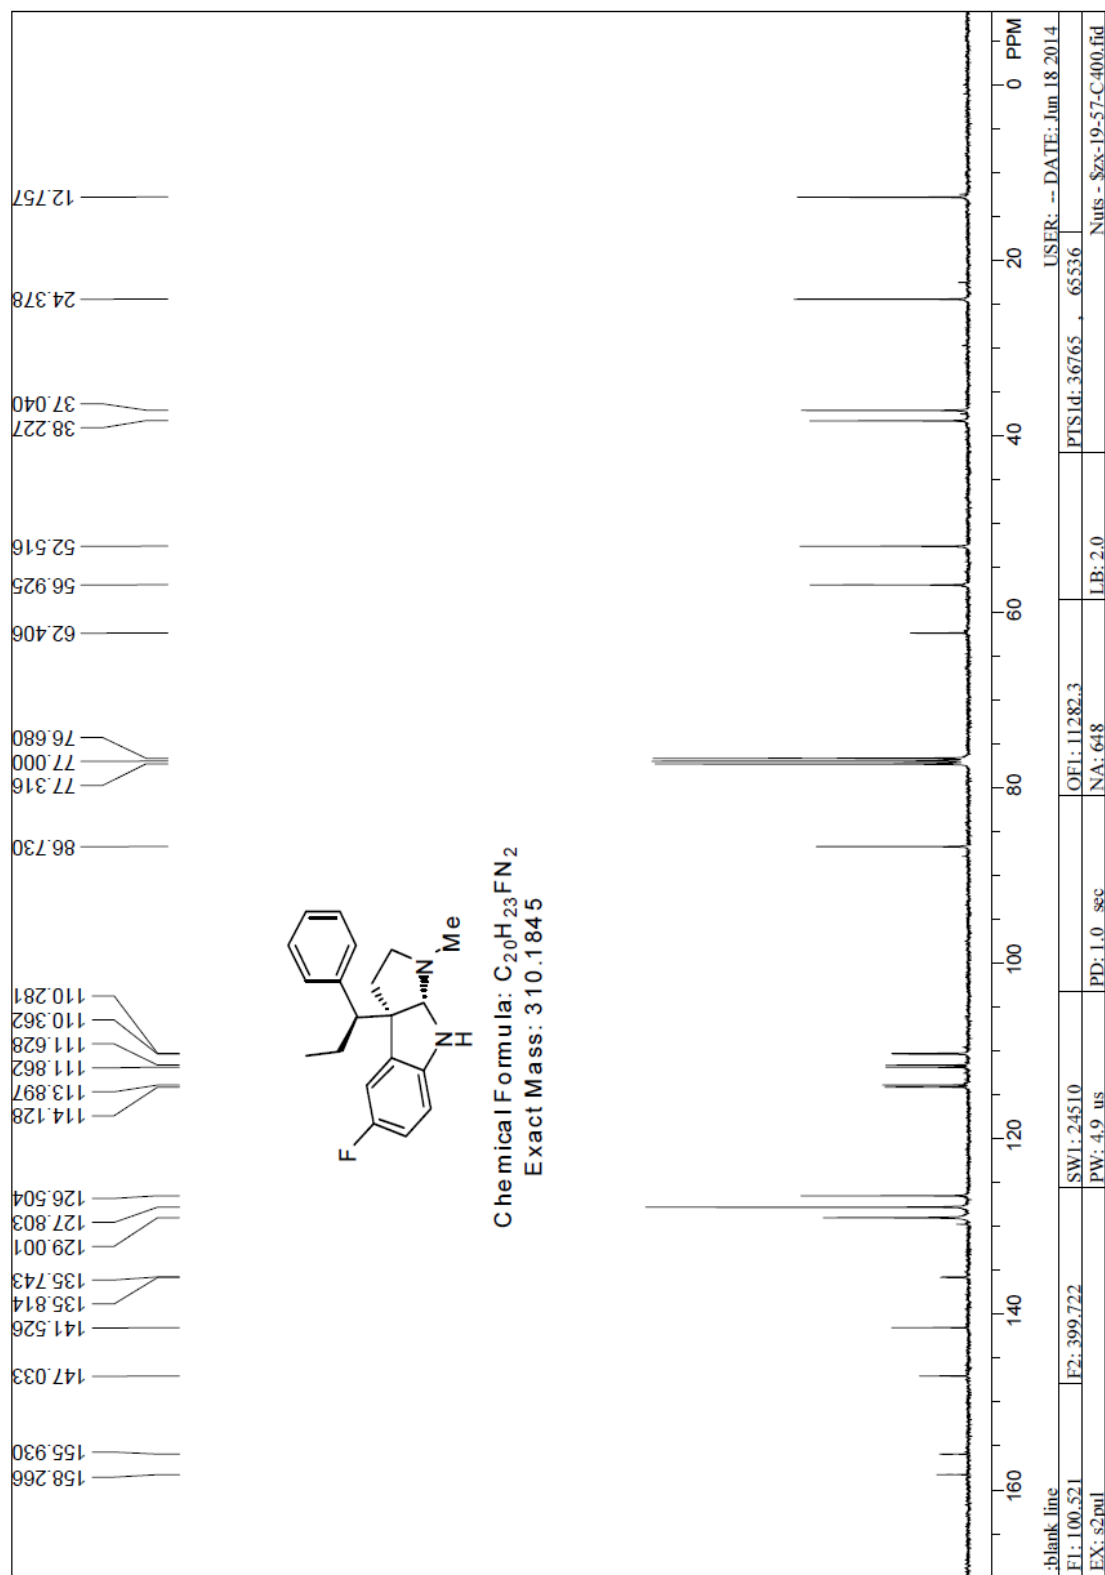

Compound **9**'s  $^{19}\text{F}$  NMR Spectra

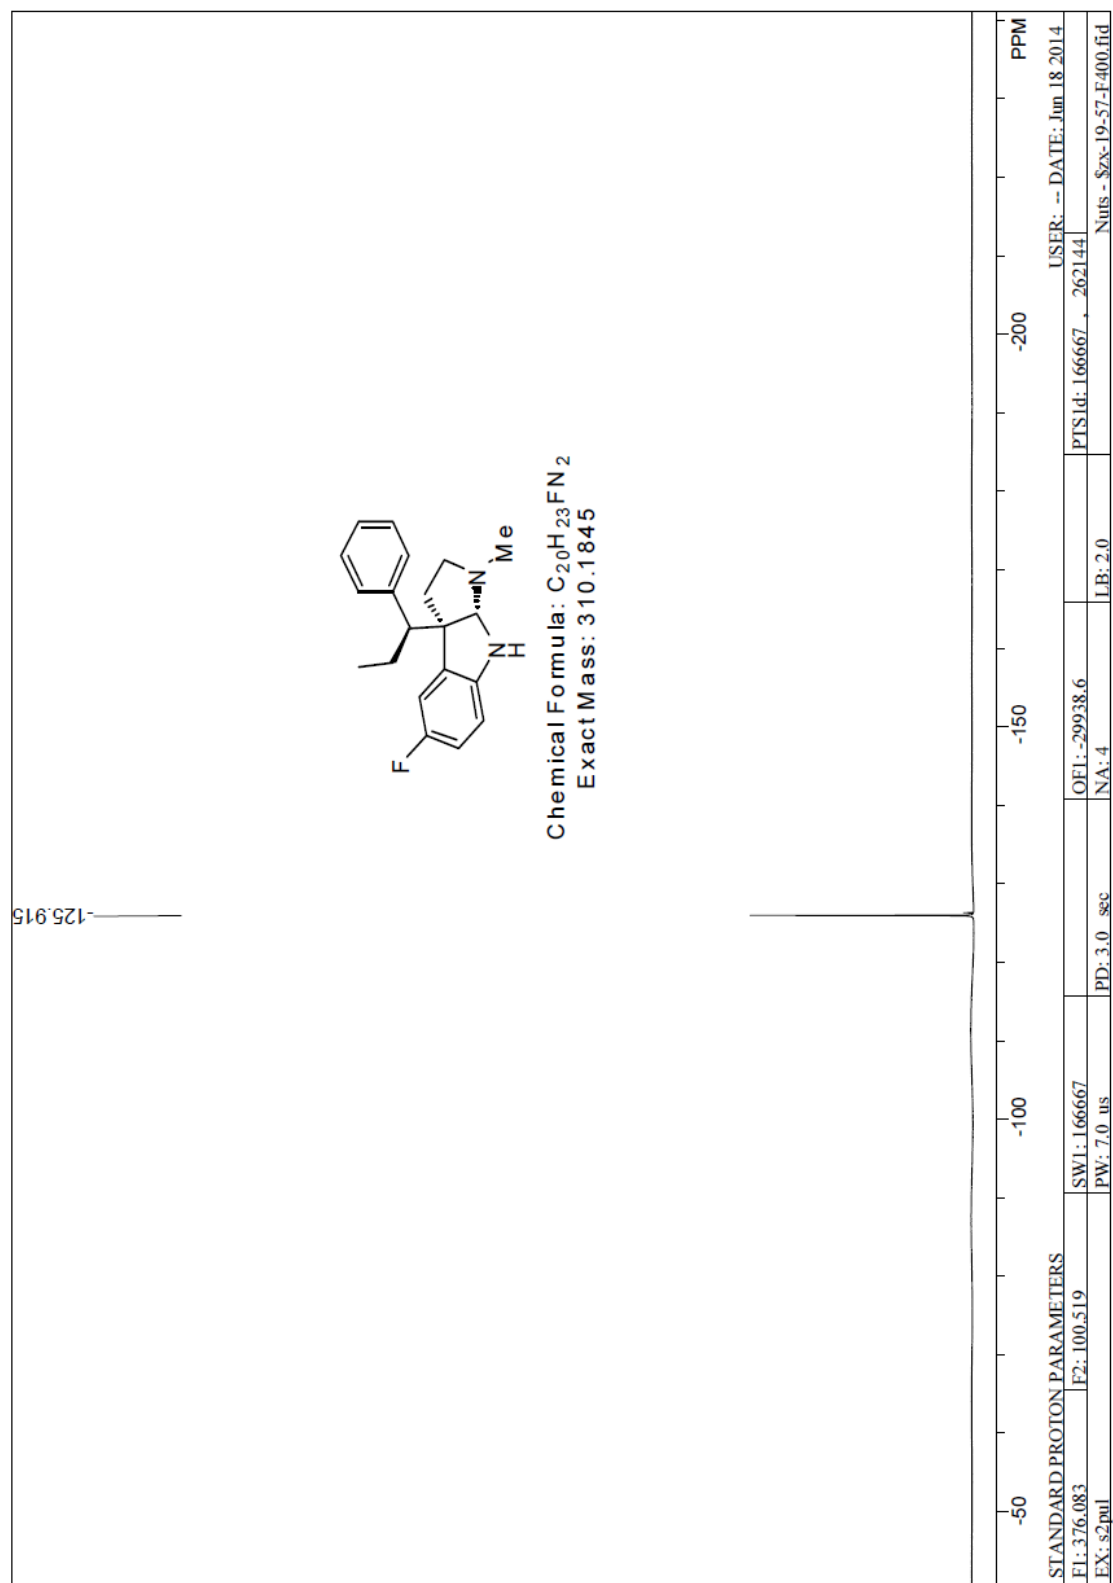

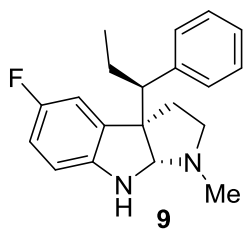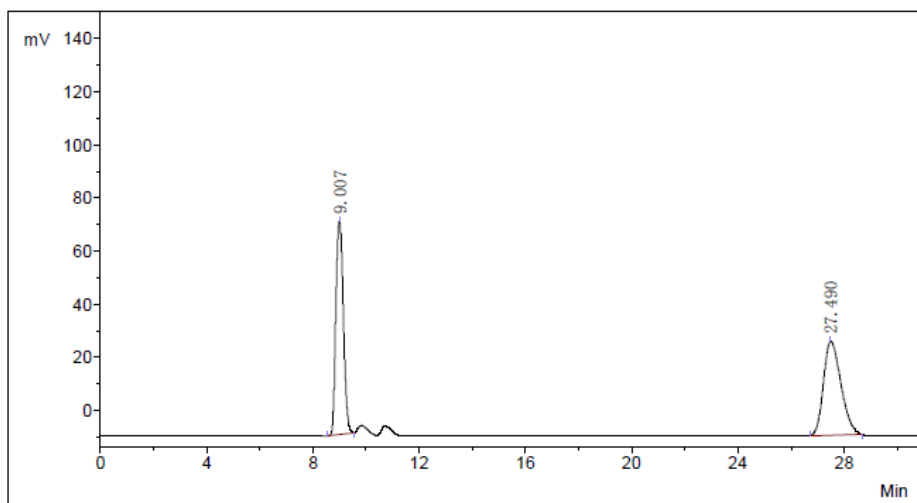

| No.   | PeakNo | ID. Name | R. Time | PeakHeight | PeakArea  | PerCent  |
|-------|--------|----------|---------|------------|-----------|----------|
| 1     | 1      | Unknown  | 9.007   | 80213.0    | 1582908.0 | 49.5378  |
| 2     | 2      | Unknown  | 27.490  | 35356.8    | 1612447.3 | 50.4622  |
| Total |        |          |         | 115569.8   | 3195355.3 | 100.0000 |

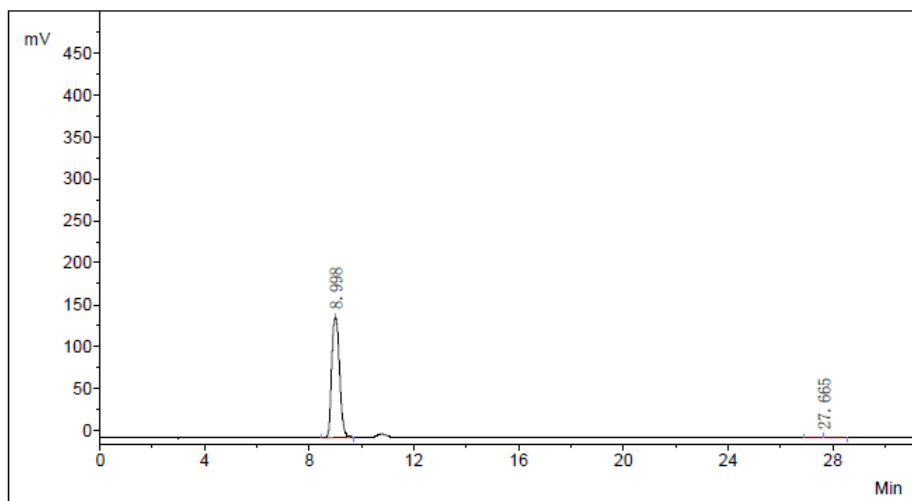

| No.   | PeakNo | ID. Name | R. Time | PeakHeight | PeakArea  | PerCent  |
|-------|--------|----------|---------|------------|-----------|----------|
| 1     | 1      | Unknown  | 8.998   | 144005.0   | 3001531.3 | 98.9876  |
| 2     | 2      | Unknown  | 27.665  | 647.4      | 30697.9   | 1.0124   |
| Total |        |          |         | 144652.4   | 3032229.2 | 100.0000 |

# Compound 6's <sup>1</sup>H NMR Spectra

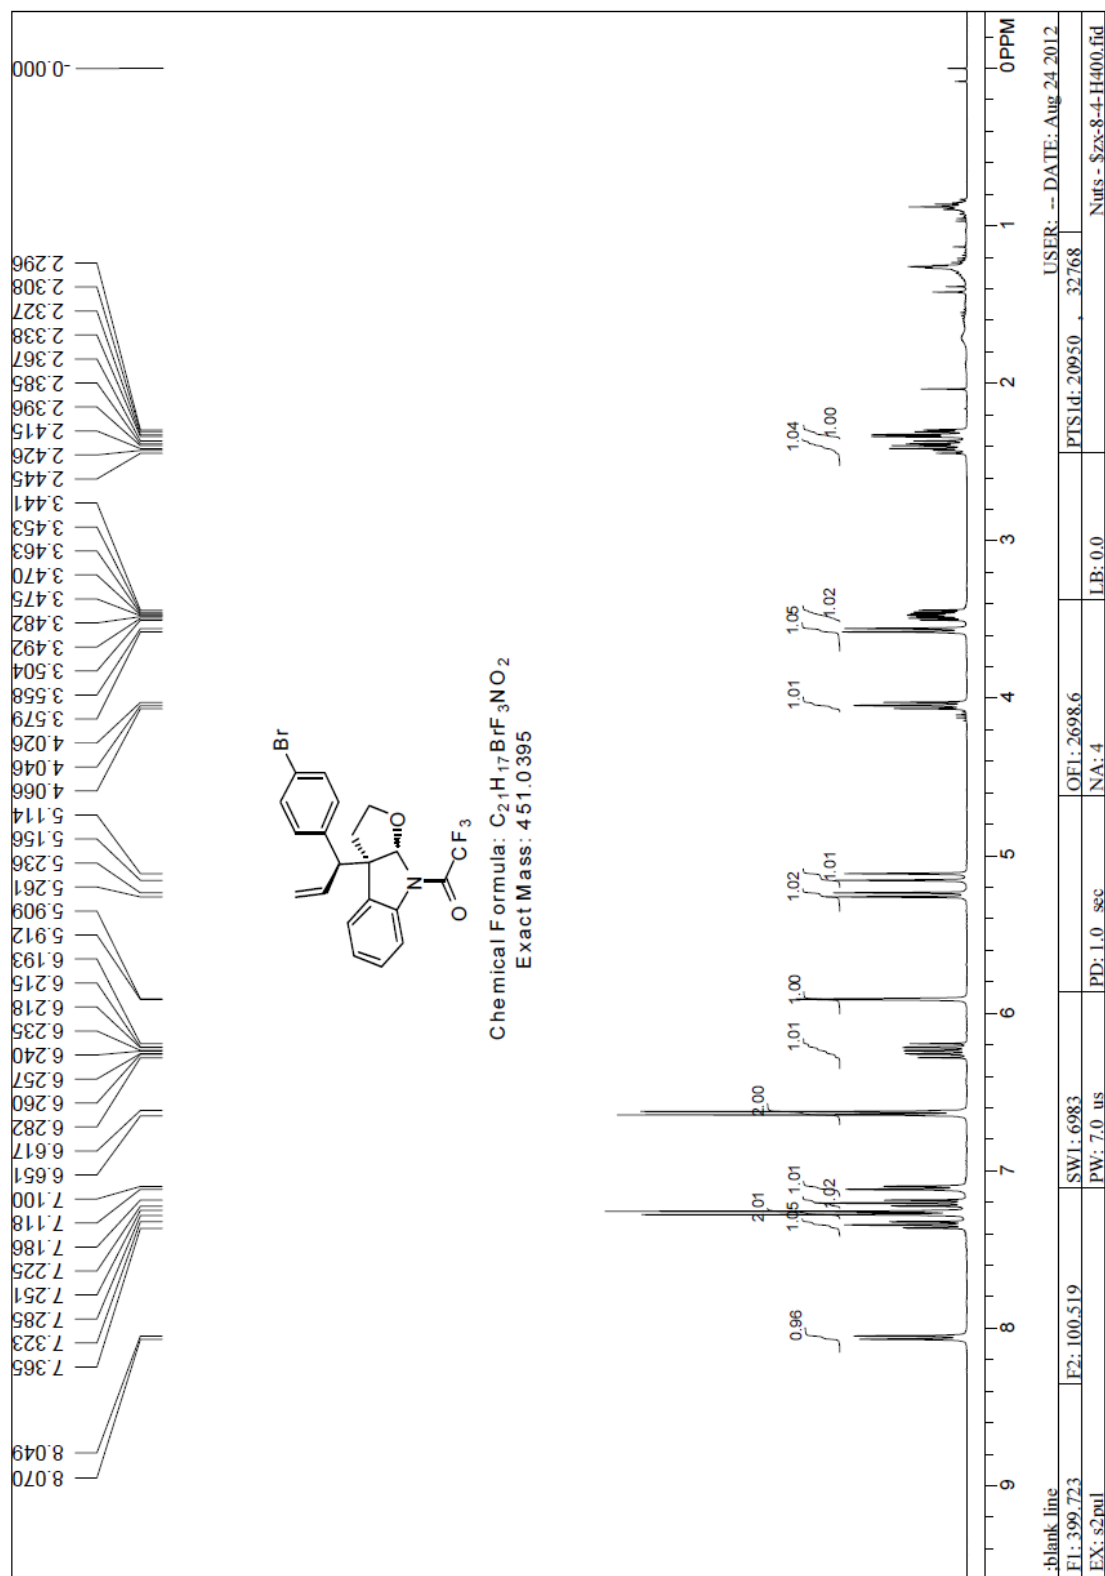

# Compound 6's <sup>13</sup>C NMR Spectra

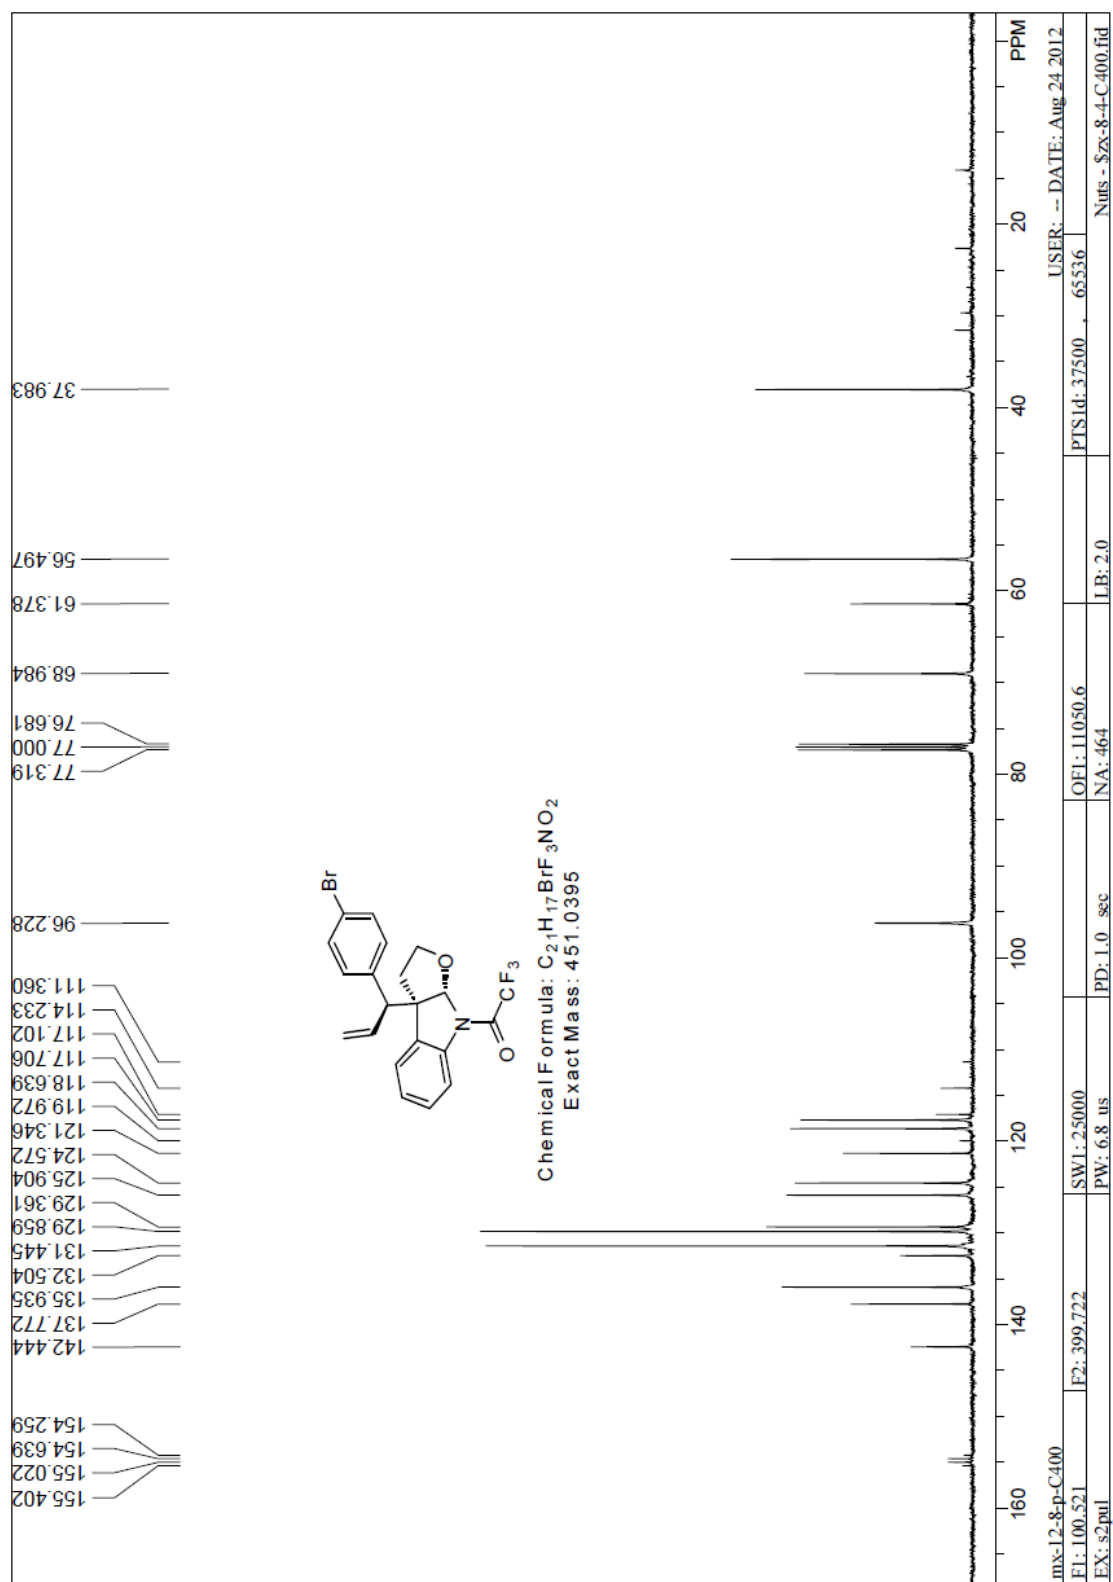



Compound **6**'s  $^{19}\text{F}$  NMR Spectra

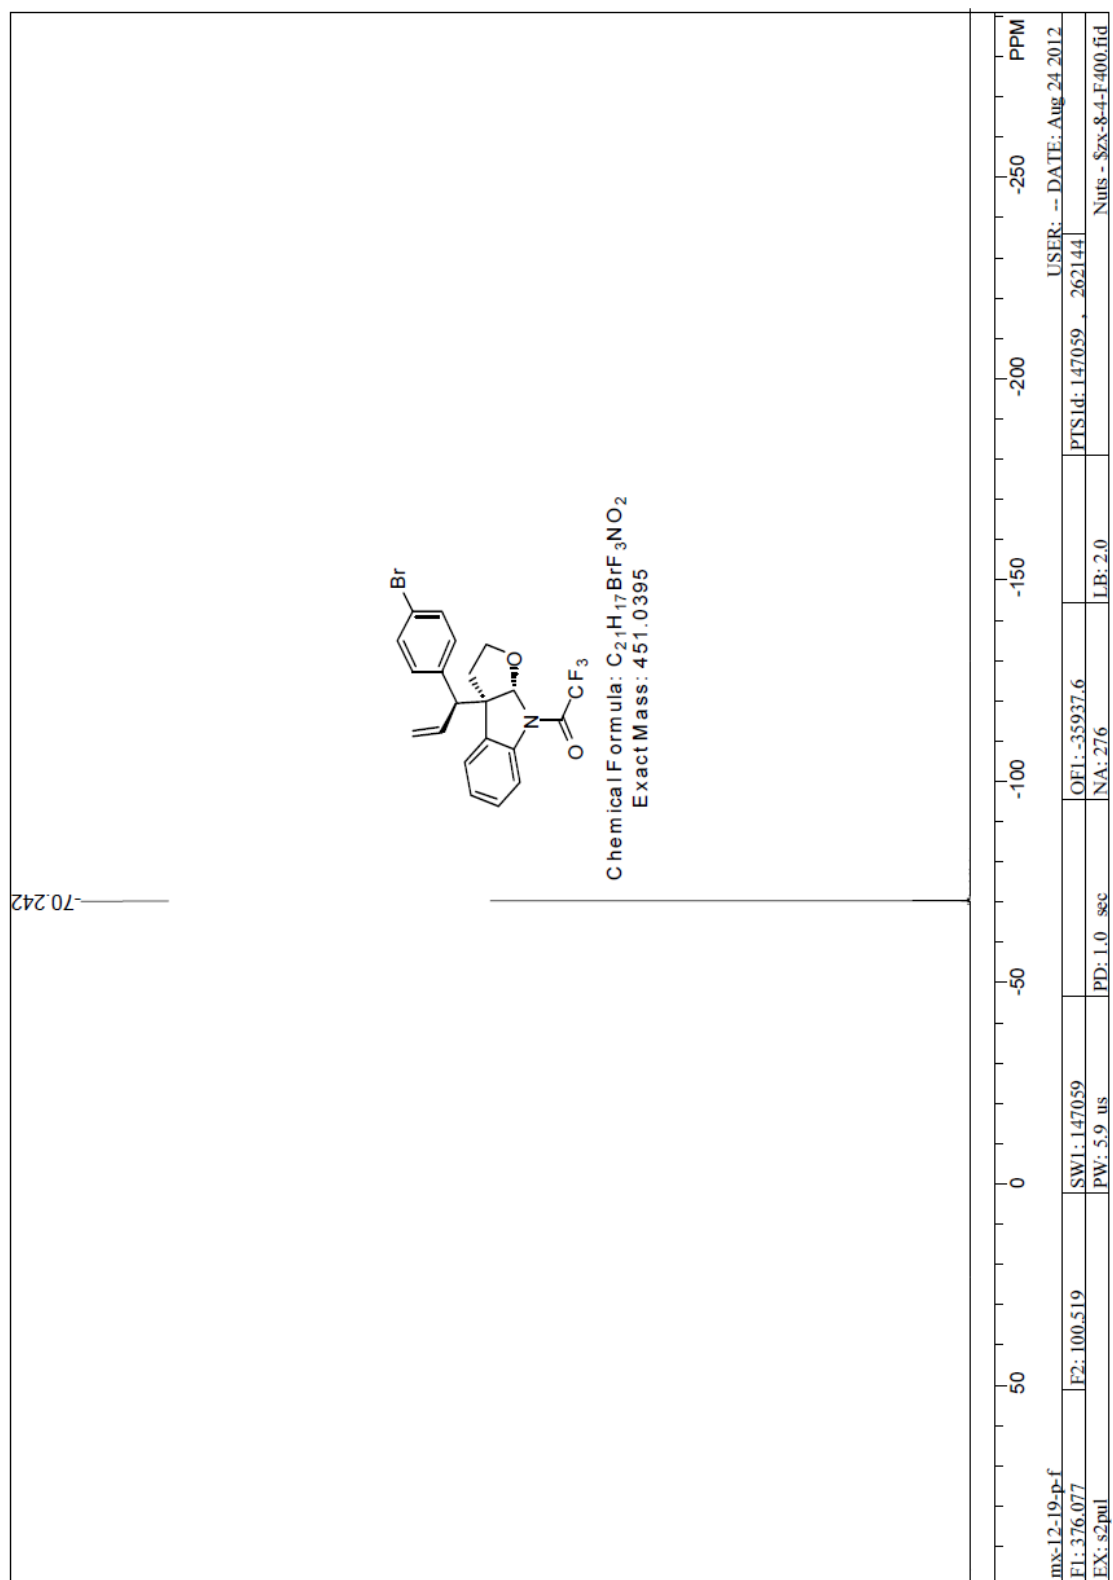

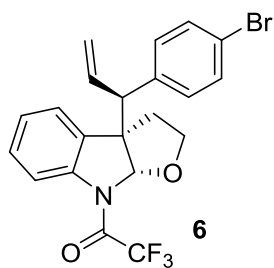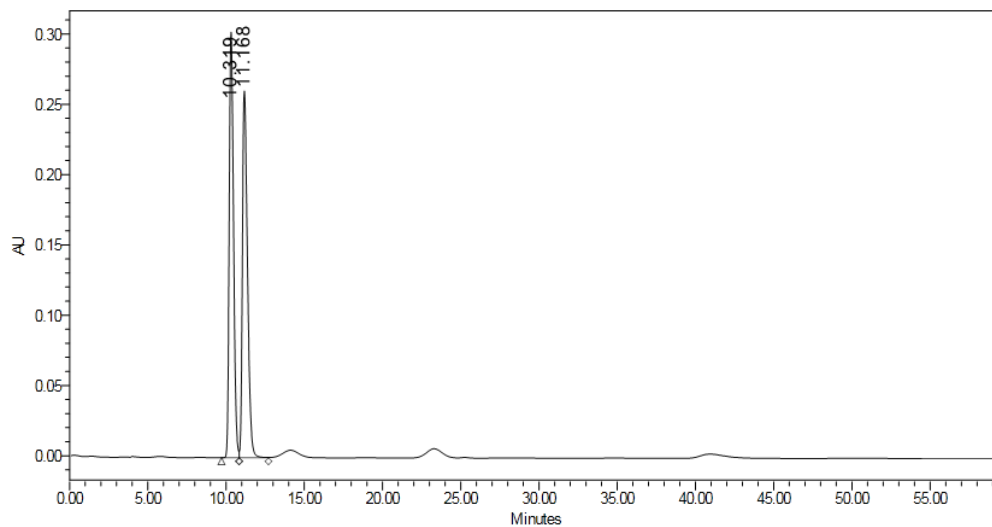

|   | RT<br>(min) | Area<br>( $\mu\text{V}\cdot\text{sec}$ ) | % Area | Height<br>( $\mu\text{V}$ ) | % Height |
|---|-------------|------------------------------------------|--------|-----------------------------|----------|
| 1 | 10.319      | 5815771                                  | 49.80  | 302720                      | 53.71    |
| 2 | 11.168      | 5862061                                  | 50.20  | 260935                      | 46.29    |

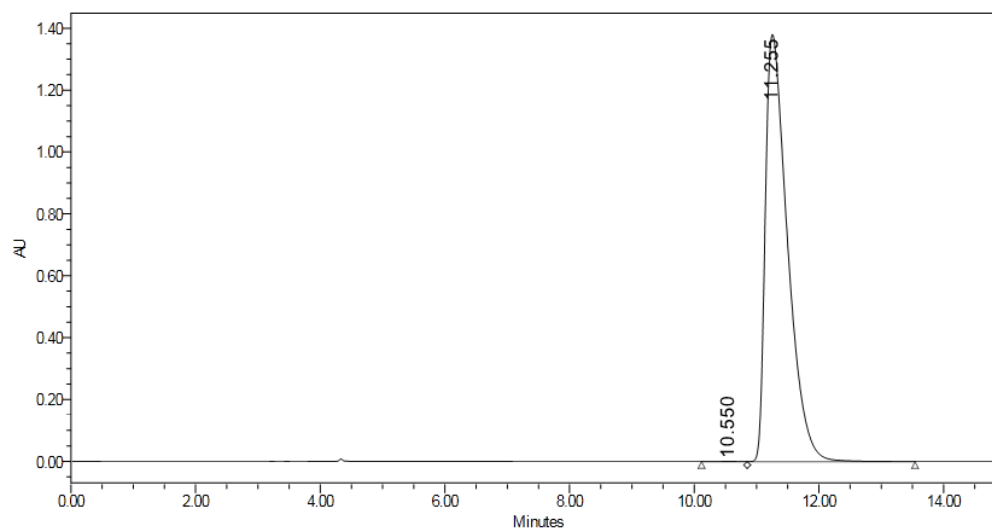

|   | RT<br>(min) | Area<br>( $\mu\text{V}\cdot\text{sec}$ ) | % Area | Height<br>( $\mu\text{V}$ ) | % Height |
|---|-------------|------------------------------------------|--------|-----------------------------|----------|
| 1 | 10.550      | 9359                                     | 0.03   | 447                         | 0.03     |
| 2 | 11.255      | 34057631                                 | 99.97  | 1380660                     | 99.97    |
